# Supplementary material
Source: Research Square preprint supplement (doi:10.21203/rs.3.rs-8683759/v1)
Supplement: Supplementary file 1 [file 1af7b779bd8dfea548b42d1a.pdf]

## **Structure-Driven Chirality-Induced Spin Selectivity in Self-Sorted Azahelicenes via Facile Electrosynthesis**

Zuowei Sun<sup>1,†</sup>, Shaokun Tao<sup>1,†</sup>, Haojie Zhang<sup>2</sup>, Yun Yang<sup>1</sup>, Minghui Wang<sup>1</sup>, Li  
Chen<sup>1</sup>, Yi Tan<sup>1</sup>, Haiyan Fu<sup>1</sup>, Ruixiang Li<sup>1</sup>, Dan Li<sup>2</sup>, Hua Chen<sup>1</sup>, Dong Luo<sup>\*,2</sup>, Xueli  
Zheng<sup>\*,1</sup> & Weichao Xue<sup>\*,1</sup>

*<sup>1</sup>Key Laboratory of Green Chemistry & Technology, Ministry of Education, College of  
Chemistry, Sichuan University  
Chengdu 610064, Sichuan, P. R. China.*

*<sup>2</sup>College of Chemistry and Materials Science, Guangdong Provincial Key Laboratory of  
Supramolecular Coordination Chemistry, Jinan University  
Guangzhou 510632, Guangdong, P. R. China*

*\*Corresponding author.*

*†These authors contributed equally.*

*Email: weichaoxue@scu.edu.cn; zhengxueli@scu.edu.cn; luodong@jnu.edu.cn*

## Supporting Information

### Table of Contents

|                                                                             |     |
|-----------------------------------------------------------------------------|-----|
| 1 General Information .....                                                 | S4  |
| 2 Optimization Study.....                                                   | S6  |
| 2.1 Optimization Study of Redox Mediators.....                              | S6  |
| 2.2 Optimization Study of Electrode .....                                   | S7  |
| 2.3 Optimization Study of Current .....                                     | S8  |
| 2.4 Optimization Study of Electrolyte.....                                  | S9  |
| 2.5 Optimization Study of Solvent .....                                     | S11 |
| 3 Experimental Details for the Substrate.....                               | S13 |
| 3.1 General Procedure for Synthesis of Substrate Type 1 ( <b>GP1</b> )..... | S13 |
| 3.2 General Procedure for Synthesis of Substrate Type 2 ( <b>GP2</b> )..... | S13 |
| 3.3 General Procedure for Synthesis of Substrate Type 3 ( <b>GP3</b> )..... | S14 |
| 3.4 Characterization Data of the Substrate .....                            | S15 |
| 4 Experimental Details for the Aza[5–9]helicenes.....                       | S38 |
| 4.1 General Procedure for Synthesis of Helicenes Type 1 ( <b>GP4</b> )..... | S38 |
| 4.2 General Procedure for Synthesis of Helicenes Type 2 ( <b>GP5</b> )..... | S38 |
| 4.3 General Procedure for Synthesis of Helicenes Type 3 ( <b>GP6</b> )..... | S39 |
| 4.4 Gram-Scale Experiment .....                                             | S39 |
| 4.5 Characterization Data of the Helicenes .....                            | S41 |
| 5 Mechanistic Studies.....                                                  | S64 |
| 5.1 Cyclic Voltammetry (CV) Experiments.....                                | S64 |
| 5.2 Cyclic Voltammetry (CV) Experiments of Substrate <b>5a</b> .....        | S64 |
| 5.3 Cyclic Voltammetry (CV) Experiments of Substrate <b>11a</b> .....       | S65 |
| 5.4 Radical probe experiments. ....                                         | S66 |
| 5.5 Proposed Mechanism.....                                                 | S67 |
| 6 Single Crystal Structures of Helicenes <b>11</b> and <b>20</b> .....      | S68 |
| 6.1 Chiral HPLC separations.....                                            | S91 |

---

|                                                                  |      |
|------------------------------------------------------------------|------|
| 7 Photophysical Properties .....                                 | S103 |
| 7.1 UV-Vis Absorption and Fluorescence.....                      | S103 |
| 7.2 Circular Dichroism (CD).....                                 | S106 |
| 7.3 Circularly Polarized Luminescence (CPL).....                 | S106 |
| 8 DFT Calculations .....                                         | S108 |
| 9 AFM Topography of the Thin Films of Helicene Enantiomers ..... | S110 |
| 10 Spin Polarization of Thin Films of Helicene Enantiomers.....  | S112 |
| 11 NMR Spectra.....                                              | S118 |
| 12 References .....                                              | S208 |

## 1 General Information

All reactions were performed in flame-dried glassware using conventional Schlenk techniques under a static pressure of nitrogen unless otherwise stated. Liquids and solutions were transferred with syringes. Unless otherwise specified, all reagents were purchased from commercial sources and used without further purification. All electrodes were commercially obtained and used as received: platinum plate (Shanghai Yueci Electronics, 99.99% purity), graphite felt (Tianjin Carbon Factory, 5 mm thickness), and graphite rod (Tianjin Carbon Factory, 5 mm diameter). Analytical thin layer chromatography (TLC) was performed on silica gel 60 F254/0.25 mm glass plates by *Merck*. Flash column chromatography was performed on silica gel 12–120 (40–63  $\mu\text{m}$ , 60  $\text{\AA}$ , 12–120 g) by *SepaBean machine* using the indicated solvents.  $^1\text{H}$  and  $^{13}\text{C}$  NMR spectra were recorded on *Bruker AVANCE IIIHD 400 NMR* spectrometers in  $\text{CDCl}_3$  or  $\text{DMSO-}d_6$  solutions. Chemical shifts are reported in parts per million (ppm) and are referenced to the residual solvent resonance as the internal standard. Chemical shifts of the NMR spectra are reported relative to  $\text{CDCl}_3$  ( $^1\text{H}$  NMR:  $\delta = 7.26$  ppm,  $^{13}\text{C}$  NMR:  $\delta = 77.0$  ppm),  $\text{DMSO-}d_6$  ( $^1\text{H}$  NMR:  $\delta = 2.50$  ppm,  $^{13}\text{C}$  NMR:  $\delta = 39.5$  ppm). Data are reported as follows: chemical shift, multiplicity (s = singlet, d = doublet, t = triplet, q = quartet, m = multiplet, br = broad signal), coupling constants (Hz), and integration. Enantiomeric analyses were determined by analytical high performance liquid chromatography (HPLC) on an *Agilent Technologies* 1220 Infinity II instrument. Chiral HPLC separations were carried out using a *Shimadzu LC-20AT* instrument. High resolution electrospray ionisation mass spectra (HR-ESI-MS) were recorded on a *SCIEX X500R QTOF* instrument. Cyclic voltammetry was performed using a *CHI760E* analyzer with a scan rate of 100 mV/s at room temperature to investigate the oxidation potentials. Single crystals suitable for X-ray diffraction analyses were obtained from their solution on a *Bruker APEX-II* CCD diffractometer. UV-Vis spectra were recorded on a *Thermo Scientific GENESYS 180* UV-Visible spectrophotometer, and the fluorescence spectra were recorded on a *Techcomp FL970* spectrometer at room temperature. CD spectra were recorded on automatic mode using a *Bio Logic MOS-500* multifunctional circular dichroism spectrometer, and the CPL spectra were measured with a *JASCO CPL-300* spectrophotometer at room temperature. The transient photoluminescence decay characteristics and absolute PL

quantum yield were measured on a *Horiba JobinYvon* Fluorolog-3 spectrofluorometer. AFM Topography and magnetic conductive probe atomic force microscope (mc-AFM) measurements were performed using Oxford MFP-3D Origin at room temperature.

## 2 Optimization Study

### 2.1 Optimization Study of Redox Mediators

**Table S1.** Screening of the optimal quantity of redox mediators<sup>[a]</sup>.

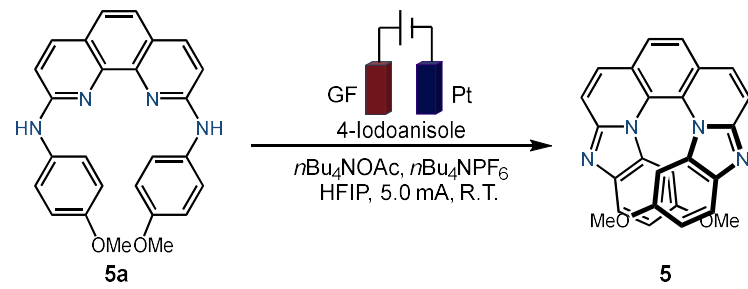

| Entry | 4-Iodoanisole [mol%] | Yield [%] <sup>[b]</sup> |
|-------|----------------------|--------------------------|
| 1     | 40                   | 59                       |
| 2     | 30                   | 60                       |
| 3     | 25                   | 69                       |
| 4     | 20                   | 68                       |
| 5     | 10                   | 56                       |
| 6     | 5                    | 64                       |
| 7     | 1                    | 60                       |
| 8     | 0                    | 66                       |

<sup>[a]</sup>Reaction conditions: undivided cell, GF as anode, Pt as cathode, **5a** (0.10 mmol), 4-iodoanisole, *n*Bu<sub>4</sub>NOAc (0.40 mmol), *n*Bu<sub>4</sub>NPF<sub>6</sub> (0.200 M), HFIP (2.50 mL), 5.0 mA, 2 h, R.T. <sup>[b]</sup><sup>1</sup>H NMR yield, using 1,3,5-trimethoxybenzene as internal standard.

## 2.2 Optimization Study of Electrode

**Table S2.** Screening of the electrode sheet<sup>[a]</sup>.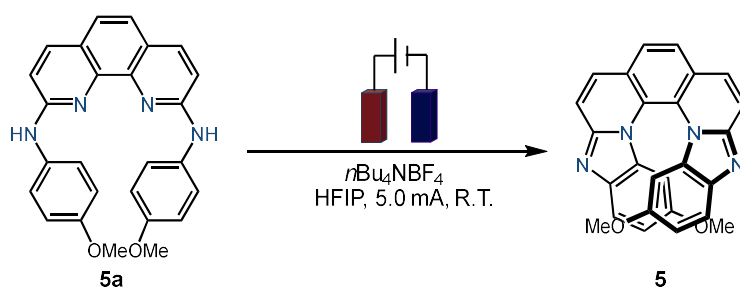

| Entry | Electrode           | Yield [%] <sup>[b]</sup> |
|-------|---------------------|--------------------------|
| 1     | GF   GF             | 66                       |
| 2     | GF   Pt             | 69                       |
| 3     | Pt   Pt             | 46                       |
| 4     | Graphite   Pt       | 27                       |
| 5     | Graphite   Graphite | 32                       |
| 6     | Pt   GF             | 22                       |
| 7     | Pt   Graphite       | 34                       |

<sup>[a]</sup>Reaction conditions: undivided cell, **5a** (0.10 mmol),  $n\text{Bu}_4\text{NBF}_4$  (0.100 M), HFIP (2.50 mL), 5.0 mA, 2 h, R.T. <sup>[b]</sup><sup>1</sup>H NMR yield, using 1,3,5-trimethoxybenzene as internal standard.

### 2.3 Optimization Study of Current

**Table S3.** Screening of the reaction current<sup>[a]</sup>.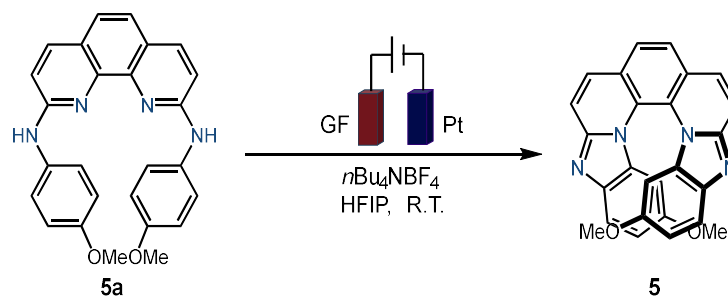

| Entry | Current [mA]   | Yield [%] <sup>b</sup> |
|-------|----------------|------------------------|
| 1     | 2.5 mA, 4.0 h  | 64                     |
| 2     | 5.0 mA, 2.0 h  | 69                     |
| 3     | 7.5 mA, 1.3 h  | 68                     |
| 4     | 10.0 mA, 1.0 h | 65                     |
| 5     | 12.5 mA, 0.8 h | 57                     |

<sup>[a]</sup>Reaction conditions: undivided cell, GF as anode, Pt as cathode, **5a** (0.10 mmol),  $n\text{Bu}_4\text{NBF}_4$  (0.100 M), HFIP (2.50 mL), R.T. <sup>[b]</sup><sup>1</sup>H NMR yield, using 1,3,5-trimethoxybenzene as internal standard.

## 2.4 Optimization Study of Electrolyte

Table S4. Screening of the type of electrolyte<sup>[a]</sup>.
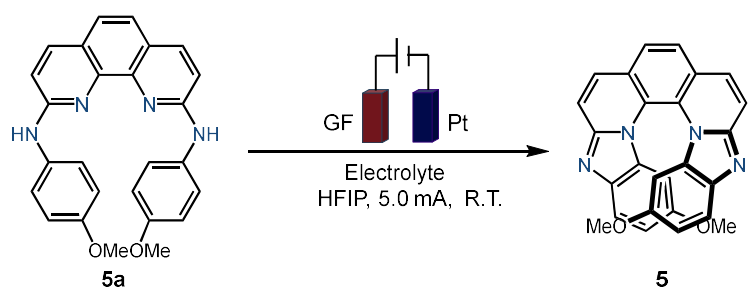

| Entry | Electrolyte                                | Yield [%] <sup>[b]</sup> |
|-------|--------------------------------------------|--------------------------|
| 1     | LiClO <sub>4</sub>                         | 49                       |
| 2     | LiBF <sub>4</sub>                          | 28                       |
| 3     | <i>n</i> Bu <sub>4</sub> NBF <sub>4</sub>  | 69                       |
| 4     | <i>n</i> Bu <sub>4</sub> NPF <sub>6</sub>  | 61                       |
| 5     | <i>n</i> Bu <sub>4</sub> NClO <sub>4</sub> | 54                       |
| 6     | <i>n</i> Bu <sub>4</sub> NI                | 40                       |

<sup>[a]</sup>Reaction conditions: undivided cell, GF as anode, Pt as cathode, **5a** (0.10 mmol), electrolyte (0.100 M), HFIP (2.50 mL), 5.0 mA, 2 h, R.T. <sup>[b]</sup><sup>1</sup>H NMR yield, using 1,3,5-trimethoxybenzene as internal standard. Unless otherwise stated, *n*Bu<sub>4</sub>NBF<sub>4</sub> was used as the supporting electrolyte due to its superior electrochemical stability under the reaction conditions.

**Table S5.** Screening of the electrolyte concentration<sup>[a]</sup>.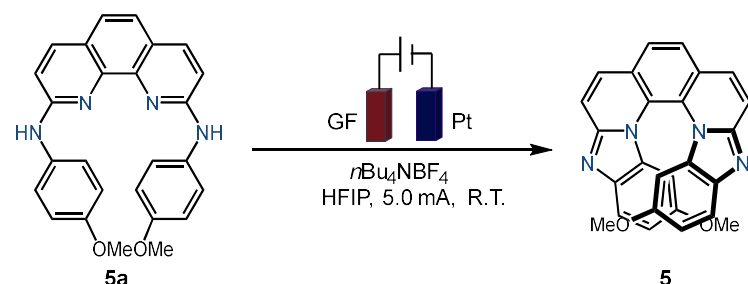

**5a**  $\xrightarrow[\text{HFIP, 5.0 mA, R.T.}]{\text{GF, Pt, } n\text{Bu}_4\text{NBF}_4}$  **5**

| Entry | $n\text{Bu}_4\text{NBF}_4$ | Yield [%] <sup>[b]</sup> |
|-------|----------------------------|--------------------------|
| 1     | 0.100 M                    | 69                       |
| 2     | 0.150 M                    | 88                       |
| 3     | 0.200 M                    | 90                       |
| 4     | 0.250 M                    | 90                       |

<sup>[a]</sup>Reaction conditions: undivided cell, GF as anode, Pt as cathode, **5a** (0.10 mmol),  $n\text{Bu}_4\text{NBF}_4$ , HFIP (2.50 mL), 5.0 mA, 2 h, R.T. <sup>[b]</sup><sup>1</sup>H NMR yield, using 1,3,5-trimethoxybenzene as internal standard.

## 2.5 Optimization Study of Solvent

**Table S6.** Screening of the solvent<sup>[a]</sup>.

Since the oxidation potential of substrates in electrochemical oxidation correlates with their electron density, condition optimization was first carried out using electron-rich substrates. A trifluoromethyl-substituted substrate was then selected as a representative electron-deficient system for condition screening. Only HFIP afforded the product in 23% yield (entry 5), while other alcohol solvents resulted in trace conversion. However, the HFIP/H<sub>2</sub>O (5/1) mixed solvent supplies protons for cathodic hydrogen evolution, facilitating the anodic oxidation.

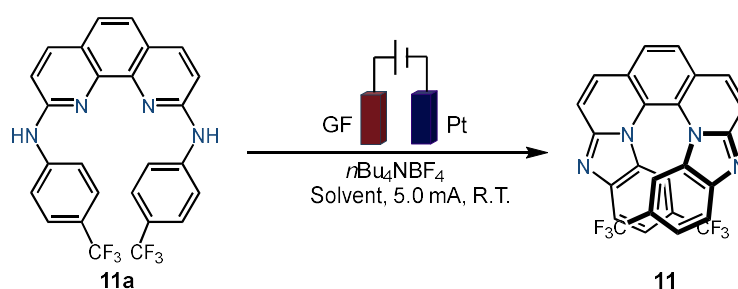

| Entry             | Solvent                                          | Yield [%] <sup>[c]</sup> |
|-------------------|--------------------------------------------------|--------------------------|
| 1                 | MeOH                                             | Trace                    |
| 2                 | EtOH                                             | Trace                    |
| 3                 | <i>i</i> -PrOH                                   | Trace                    |
| 4                 | <i>n</i> -BuOH                                   | Trace                    |
| 5                 | HFIP                                             | 23                       |
| 6 <sup>[b]</sup>  | H <sub>2</sub> O                                 | N.R.                     |
| 7 <sup>[b]</sup>  | $V(\text{HFIP})/V(\text{H}_2\text{O}) = 2.5/0.5$ | 52                       |
| 8 <sup>[b]</sup>  | $V(\text{HFIP})/V(\text{H}_2\text{O}) = 2.0/1.0$ | 34                       |
| 9 <sup>[b]</sup>  | $V(\text{HFIP})/V(\text{H}_2\text{O}) = 1.5/1.5$ | 17                       |
| 10 <sup>[b]</sup> | $V(\text{HFIP})/V(\text{H}_2\text{O}) = 1.0/2.0$ | Trace                    |
| 11 <sup>[b]</sup> | $V(\text{HFIP})/V(\text{H}_2\text{O}) = 0.5/2.5$ | Trace                    |

<sup>[a]</sup>Reaction conditions: undivided cell, GF as anode, Pt as cathode, **11a** (0.10 mmol), *n*Bu<sub>4</sub>NBF<sub>4</sub> (0.100 M), solvent (2.50 mL), 5.0 mA, 2 h, R.T. <sup>[b]</sup>Solvent (3.00 mL), otherwise identical to a. <sup>[c]</sup><sup>1</sup>H NMR yield, using 1,3,5-trimethoxybenzene as internal standard.

**Table S7.** Screening of the electrolyte concentration<sup>[a]</sup>.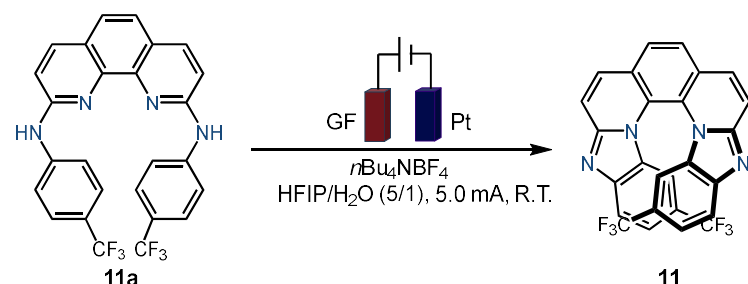

| Entry | Electrolyte concentration                         | Yield [%] <sup>[b]</sup> |
|-------|---------------------------------------------------|--------------------------|
| 1     | 0.100 M <i>n</i> Bu <sub>4</sub> NBF <sub>4</sub> | 52                       |
| 2     | 0.150 M <i>n</i> Bu <sub>4</sub> NBF <sub>4</sub> | 66                       |
| 3     | 0.200 M <i>n</i> Bu <sub>4</sub> NBF <sub>4</sub> | 70                       |

<sup>[a]</sup>Reaction conditions: undivided cell, GF as anode, Pt as cathode, **11a** (0.10 mmol), *n*Bu<sub>4</sub>NBF<sub>4</sub>, *V*(HFIP)/*V*(H<sub>2</sub>O) = 5/1 (3.00 mL), 5.0 mA, 2 h, R.T. <sup>[b]</sup><sup>1</sup>H NMR yield, using 1,3,5-trimethoxybenzene as internal standard.

### 3 Experimental Details for the Substrate

#### 3.1 General Procedure for Synthesis of Substrate Type 1 (GP1)

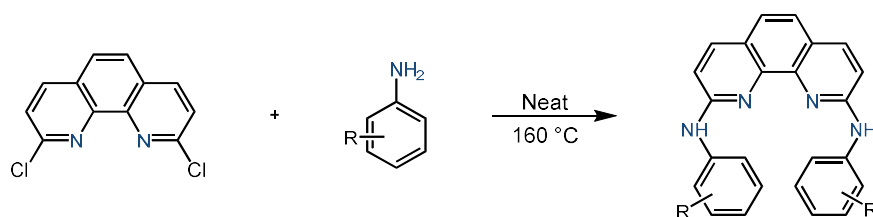

A dried two-neck round-bottom flask equipped with a magnetic stir bar was connected to a Schlenk line and purged with N<sub>2</sub>. The flask was charged with 2,9-dichloro-1,10-phenanthroline (4.0 mmol, 1.00 equiv.) and an aromatic amine (20.0 mmol, 5.00 equiv.) and then heated at 160 °C for 4 h. If the solid did not melt, anhydrous dimethyl sulfoxide (20.0 mL) was added. After cooling to room temperature, saturated aqueous NaHCO<sub>3</sub> (50.0 mL) was added. The mixture was extracted with dichloromethane (50.0 mL × 3), and the combined organic layers were dried over anhydrous sodium sulfate. The solvent was removed under reduced pressure, and the crude residue was purified by column chromatography on silica gel to afford the desired product.<sup>1</sup>

#### 3.2 General Procedure for Synthesis of Substrate Type 2 (GP2)

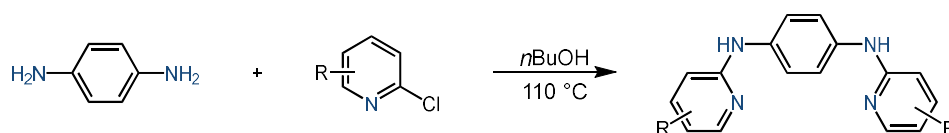

A dried two-neck round-bottom flask equipped with a magnetic stir bar was connected to a Schlenk line and purged with N<sub>2</sub>. To the flask were added *p*-phenylenediamine (4.0 mmol, 1.00 equiv.) and an N-heteroaryl chloride (10.0 mmol, 2.50 equiv.), followed by *n*-butanol (20.0 mL). The reaction mixture was heated at 110 °C for 24 h. After cooling to room temperature, saturated aqueous NaHCO<sub>3</sub> (50.0 mL) was added. The mixture was extracted with dichloromethane (50.0 mL × 3), and the combined organic layers were dried over anhydrous sodium sulfate. The solvent was removed under reduced pressure, and the crude residue was purified by column chromatography on silica gel to afford the desired product.<sup>2</sup>

### 3.3 General Procedure for Synthesis of Substrate Type 3 (GP3)

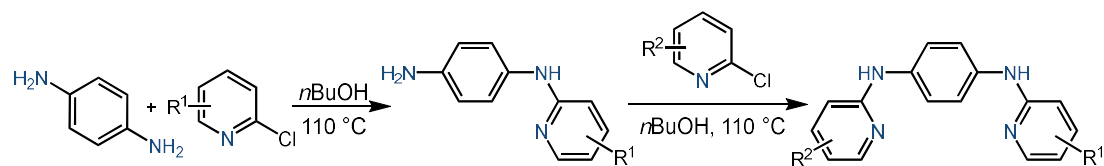

A dried two-neck round-bottom flask equipped with a magnetic stir bar was connected to a Schlenk line and purged with N<sub>2</sub>. To the flask were added *p*-phenylenediamine (4.0 mmol, 1.00 equiv.) and an N-heteroaryl chloride (4.0 mmol, 1.00 equiv.), followed by *n*-butanol (20.0 mL). The reaction mixture was heated at 110 °C for 24 h. After cooling to room temperature, a second N-heteroaryl chloride (4.0 mmol, 1.00 equiv.) was added, and the mixture was heated at 110 °C for another 24 h. Upon cooling to room temperature, saturated aqueous NaHCO<sub>3</sub> (50.0 mL) was added. The mixture was extracted with dichloromethane (50.0 mL × 3), and the combined organic layers were dried over anhydrous sodium sulfate. The solvent was removed under reduced pressure, and the crude residue was purified by column chromatography on silica gel to afford the desired product.

### 3.4 Characterization Data of the Substrate

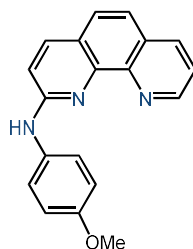

**1a**  
 $C_{19}H_{15}N_3O$   
 $M = 301.35 \text{ g/mol}$

***N*-(4-methoxyphenyl)-1,10-phenanthroline-2-amine (1a)**: Prepared from 2,9-dichloro-1,10-phenanthroline (1.00 g, 4.0 mmol) and 4-methoxyaniline (1.23 g, 10.0 mmol) according to **GPI**. Purification by flash column chromatography on silica gel using petroleum ether and ethyl acetate to afford **1a** as a grey solid (0.720 g, 60% yield).

$R_f = 0.20$  (PE/EA = 4/1).  $^1\text{H NMR}$  (400 MHz, DMSO- $d_6$ )  $\delta$  9.45 (s, 1H), 9.16–9.02 (m, 1H), 8.38 (d,  $J = 8.2$  Hz, 1H), 8.20 (d,  $J = 8.8$  Hz, 2H), 8.15 (d,  $J = 8.8$  Hz, 1H), 7.79 (d,  $J = 8.8$  Hz, 1H), 7.72–7.61 (m, 2H), 7.19 (d,  $J = 8.8$  Hz, 1H), 6.96 (d,  $J = 8.8$  Hz, 2H), 3.77 (s, 3H).  $^{13}\text{C NMR}$  (100 MHz, DMSO- $d_6$ )  $\delta$  154.7, 153.8, 149.3, 144.9, 144.7, 137.0, 135.9, 135.0, 128.9, 126.4, 122.5, 122.5, 121.7, 119.7, 114.0, 113.6, 55.2. **HRMS** (ESI-TOF) for  $C_{19}H_{16}N_3O^+$   $[M+H]^+$ : calculated 302.1288, found 302.1288.

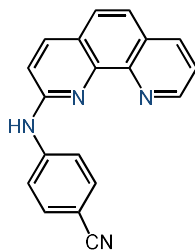**2a**C<sub>19</sub>H<sub>12</sub>N<sub>4</sub>

M = 296.33 g/mol

**4-((1,10-phenanthrolin-2-yl)amino)benzonitrile (2a)**: Prepared from 2,9-dichloro-1,10-phenanthroline (1.00 g, 4.0 mmol) and 4-aminobenzonitrile (1.18 g, 10.0 mmol) according to **GP1**. Purification by flash column chromatography on silica gel using petroleum ether and ethyl acetate to afford **2a** as a white solid (0.750 g, 63% yield).

$R_f = 0.20$  (PE/EA = 1/1). **<sup>1</sup>H NMR** (400 MHz, DMSO-*d*<sub>6</sub>)  $\delta$  10.16 (s, 1H), 9.12 (dd,  $J = 4.2, 1.8$  Hz, 1H), 8.54 (d,  $J = 8.8$  Hz, 2H), 8.43 (dd,  $J = 8.2, 1.8$  Hz, 1H), 8.31 (d,  $J = 8.6$  Hz, 1H), 7.87 (d,  $J = 8.6$  Hz, 1H), 7.83–7.75 (m, 3H), 7.74–7.68 (m, 1H), 7.34 (d,  $J = 8.8$  Hz, 1H). **<sup>13</sup>C NMR** (100 MHz, DMSO-*d*<sub>6</sub>)  $\delta$  153.7, 149.8, 145.8, 144.7, 144.4, 137.8, 136.0, 133.2, 128.9, 126.3, 123.4, 123.2, 122.9, 119.8, 118.0, 114.4, 101.7. **HRMS** (ESI-TOF) for C<sub>19</sub>H<sub>13</sub>N<sub>4</sub><sup>+</sup> [M+H]<sup>+</sup>: calculated 297.1135, found 297.1136.

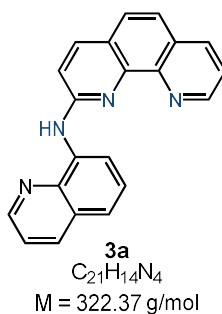

***N*-(quinolin-8-yl)-1,10-phenanthroline-2-amine (3a)**: Prepared from 2,9-dichloro-1,10-phenanthroline (1.00 g, 4.0 mmol) and quinolin-8-amine (1.44 g, 10.0 mmol) according to **GPI**. Purification by flash column chromatography on silica gel using ethyl acetate to afford **3a** as a yellow solid (0.730 g, 57% yield).

$R_f = 0.40$  (EA).  $^1\text{H NMR}$  (400 MHz,  $\text{CDCl}_3$ )  $\delta$  9.74 (s, 1H), 9.58 (dd,  $J = 8.0, 1.2$  Hz, 1H), 9.22 (dd,  $J = 4.2, 1.8$  Hz, 1H), 8.83 (dd,  $J = 4.2, 1.8$  Hz, 1H), 8.21 (dd,  $J = 8.2, 1.8$  Hz, 1H), 8.17 (dd,  $J = 8.2, 1.8$  Hz, 1H), 8.09 (d,  $J = 8.8$  Hz, 1H), 7.76 (t,  $J = 8.0$  Hz, 1H), 7.70 (d,  $J = 8.8$  Hz, 1H), 7.62–7.56 (m, 2H), 7.47–7.42 (m, 2H), 7.40 (d,  $J = 8.8$  Hz, 1H).  $^{13}\text{C NMR}$  (100 MHz,  $\text{CDCl}_3$ )  $\delta$  154.2, 149.9, 147.5, 145.6, 145.6, 138.8, 137.4, 137.0, 136.4, 135.9, 129.3, 128.3, 128.3, 126.3, 123.5, 122.8, 122.5, 121.4, 118.9, 114.3, 114.2. **HRMS** (ESI-TOF) for  $C_{21}H_{14}N_4^+$   $[M+H]^+$ : calculated 323.1291, found 323.1286.

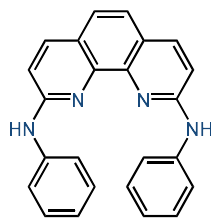

**4a**  
 $C_{24}H_{18}N_4$   
 $M = 362.44 \text{ g/mol}$

***N*<sup>2</sup>,*N*<sup>9</sup>-diphenyl-1,10-phenanthroline-2,9-diamine (4a)**: Prepared from 2,9-dichloro-1,10-phenanthroline (1.00 g, 4.0 mmol) and aniline (1.86 g, 20.0 mmol) according to **GPI**. Purification by flash column chromatography on silica gel using petroleum ether and ethyl acetate to afford **4a** as a white solid (1.07 g, 74% yield).

$R_f = 0.30$  (PE/EA = 3/1). **<sup>1</sup>H NMR** (400 MHz,  $CDCl_3$ )  $\delta$  7.97 (d,  $J = 8.8$  Hz, 2H), 7.45 (s, 2H), 7.43–7.31 (m, 10H), 7.26 (d,  $J = 8.8$  Hz, 2H), 7.14–7.07 (m, 2H). **<sup>13</sup>C NMR** (100 MHz,  $CDCl_3$ )  $\delta$  155.1, 144.6, 140.5, 138.3, 129.6, 124.4, 123.6, 122.6, 121.3, 110.9. **HRMS** (ESI-TOF) for  $C_{24}H_{19}N_4^+$   $[M+H]^+$ : calculated 363.1604, found 363.1603.

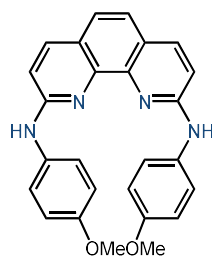**5a** $C_{26}H_{22}N_4O_2$ 

M = 422.49 g/mol

***N*<sup>2</sup>,*N*<sup>9</sup>-bis(4-methoxyphenyl)-1,10-phenanthroline-2,9-diamine (5a)**: Prepared from 2,9-dichloro-1,10-phenanthroline (1.00 g, 4.0 mmol) and 4-methoxyaniline (2.46 g, 20.0 mmol) according to **GPI**. Purification by flash column chromatography on silica gel using petroleum ether and ethyl acetate to afford **5a** as a yellow solid (1.35 g, 80% yield).

**R<sub>f</sub>** = 0.40 (PE/EA = 1/1). **<sup>1</sup>H NMR** (400 MHz, CDCl<sub>3</sub>) δ 7.91 (d, *J* = 8.8 Hz, 2H), 7.39 (s, 2H), 7.30–7.26 (m, 4H), 7.16 (s, 2H), 7.05 (d, *J* = 8.8 Hz, 2H), 6.93–6.88 (m, 4H), 3.81 (s, 6H). **<sup>13</sup>C NMR** (100 MHz, CDCl<sub>3</sub>) δ 156.9, 156.3, 144.6, 138.2, 133.3, 125.1, 124.1, 122.3, 114.9, 110.1, 55.7. **HRMS** (ESI-TOF) for C<sub>26</sub>H<sub>23</sub>N<sub>4</sub>O<sub>2</sub><sup>+</sup> [M+H]<sup>+</sup>: calculated 423.1816, found 423.1820.

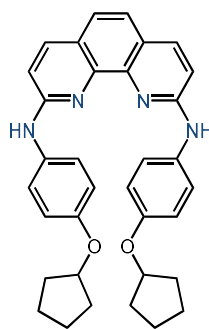**6a**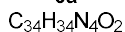
$$M = 530.67 \text{ g/mol}$$

***N*<sup>2</sup>,*N*<sup>9</sup>-bis(4-(cyclopentyloxy)phenyl)-1,10-phenanthroline-2,9-diamine (6a)**: Prepared from 2,9-dichloro-1,10-phenanthroline (1.00 g, 4.0 mmol) and 4-(cyclopentyloxy)aniline (3.55 g, 20.0 mmol) according to **GP1**. Purification by flash column chromatography on silica gel using petroleum ether and ethyl acetate to afford **6a** as a brown solid (1.59 g, 75% yield).

$R_f = 0.30$  (PE/EA = 1/1). **<sup>1</sup>H NMR** (400 MHz, CDCl<sub>3</sub>)  $\delta$  7.91 (d,  $J = 8.8$  Hz, 2H), 7.39 (s, 2H), 7.26 (d,  $J = 8.8$  Hz, 4H), 7.06 (d,  $J = 8.8$  Hz, 2H), 6.89 (d,  $J = 8.8$  Hz, 4H), 4.79–4.72 (m, 2H), 1.94–1.75 (m, 12H), 1.68–1.57 (m, 4H). **<sup>13</sup>C NMR** (100 MHz, CDCl<sub>3</sub>)  $\delta$  156.2, 155.4, 144.1, 138.1, 132.5, 125.0, 123.8, 122.0, 116.4, 109.9, 32.9, 24.1. **HRMS** (ESI-TOF) for C<sub>34</sub>H<sub>35</sub>N<sub>4</sub>O<sub>2</sub><sup>+</sup> [M+H]<sup>+</sup>: calculated 531.2755, found 531.2751.

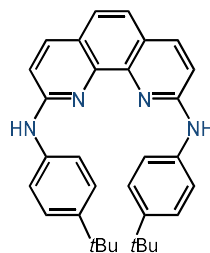**7a** $C_{32}H_{34}N_4$ 

M = 474.65 g/mol

***N*<sup>2</sup>,*N*<sup>9</sup>-bis(4-(*tert*-butyl)phenyl)-1,10-phenanthroline-2,9-diamine (7a)**: Prepared from 2,9-dichloro-1,10-phenanthroline (1.00 g, 4.0 mmol) and 4-(*tert*-butyl)aniline (2.98 g, 20.0 mmol) according to **GPI**. Purification by flash column chromatography on silica gel using petroleum ether and ethyl acetate to afford **7a** as a yellow solid (1.42 g, 75% yield).

**R<sub>f</sub>** = 0.30 (PE/EA = 7/3). **<sup>1</sup>H NMR** (400 MHz, CDCl<sub>3</sub>) δ 7.95 (d, *J* = 8.8 Hz, 2H), 7.42 (s, 2H), 7.40–7.36 (m, 4H), 7.32–7.24 (m, 8H), 1.34 (s, 18H). **<sup>13</sup>C NMR** (100 MHz, CDCl<sub>3</sub>) δ 155.6, 147.0, 144.6, 138.2, 137.7, 126.5, 124.2, 122.4, 121.9, 110.3, 34.6, 31.6. **HRMS** (ESI-TOF) for C<sub>32</sub>H<sub>35</sub>N<sub>4</sub><sup>+</sup> [M+H]<sup>+</sup>: calculated 475.2856, found 475.2863.

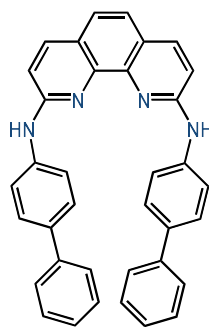**8a** $C_{36}H_{26}N_4$ 

M = 514.63 g/mol

***N*<sup>2</sup>,*N*<sup>9</sup>-di([1,1'-biphenyl]-4-yl)-1,10-phenanthroline-2,9-diamine (8a)**: Prepared from 2,9-dichloro-1,10-phenanthroline (1.00 g, 4.0 mmol) and 4-(cyclopentyloxy)aniline (3.38 g, 20.0 mmol) according to **GPI**. Purification by flash column chromatography on silica gel using petroleum ether and ethyl acetate to afford **8a** as a yellow solid (1.65 g, 80% yield).

**R<sub>f</sub>** = 0.40 (PE/EA = 1/1). **<sup>1</sup>H NMR** (800 MHz, CDCl<sub>3</sub>) δ 8.03 (dd, *J* = 8.8, 3.8 Hz, 2H), 7.62–7.60 (m, 4H), 7.59–7.56 (m, 8H), 7.49 (d, *J* = 3.8 Hz, 2H), 7.42–7.39 (m, 4H), 7.33–7.30 (m, 4H), 7.25 (s, 2H). **<sup>13</sup>C NMR** (200 MHz, CDCl<sub>3</sub>) δ 154.6, 140.6, 139.5, 138.4, 136.4, 128.8, 128.1, 127.0, 126.8, 124.2, 122.6, 121.2, 111.3. **HRMS** (ESI-TOF) for C<sub>36</sub>H<sub>27</sub>N<sub>4</sub><sup>+</sup> [M+H]<sup>+</sup>: calculated 515.2230, found 515.2237.

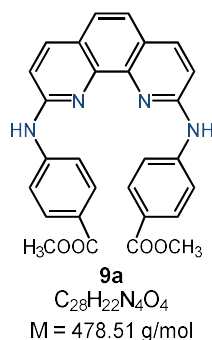

**Dimethyl 4,4'-((1,10-phenanthroline-2,9-diyl)bis(azanediyl))dibenzoate (9a):** Prepared from 2,9-dichloro-1,10-phenanthroline (1.00 g, 4.0 mmol) and methyl 4-aminobenzoate (3.02 g, 20.0 mmol) according to **GPI**. Purification by flash column chromatography on silica gel using petroleum ether and ethyl acetate to afford **9a** as a white solid (1.24 g, 65% yield).

$R_f = 0.30$  (PE/EA = 7/3).  $^1\text{H NMR}$  (400 MHz, DMSO- $d_6$ )  $\delta$  9.99 (s, 2H), 8.41 (d,  $J = 8.8$  Hz, 4H), 8.24 (d,  $J = 8.8$  Hz, 2H), 7.76 (d,  $J = 8.8$  Hz, 4H), 7.64 (s, 2H), 7.29 (d,  $J = 8.8$  Hz, 2H), 3.75 (s, 6H).  $^{13}\text{C NMR}$  (100 MHz, DMSO- $d_6$ )  $\delta$  165.9, 153.5, 146.1, 143.3, 137.7, 130.8, 124.1, 122.9, 120.8, 116.7, 114.6, 51.5. **HRMS** (ESI-TOF) for  $C_{28}H_{23}N_4O_4^+$   $[M+H]^+$ : calculated 479.1714, found 479.1719.

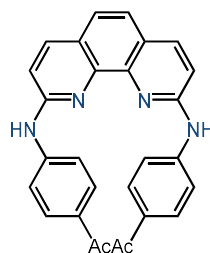**10a** $C_{28}H_{22}N_4O_2$ 

M = 446.51 g/mol

**1,1'-(((1,10-phenanthroline-2,9-diyl)bis(azanediyl))bis(4,1-phenylene))bis(ethan-1-one)**

**(10a)**: Prepared from 2,9-dichloro-1,10-phenanthroline (1.00 g, 4.0 mmol) and 1-(4-aminophenyl)ethan-1-one (2.70 g, 20.0 mmol) according to **GP1**. Purification by flash column chromatography on silica gel using petroleum ether and ethyl acetate to afford **10a** as a yellow solid (1.20 g, 67% yield).

$R_f$  = 0.30 (PE/EA = 4/1).  **$^1H$  NMR** (400 MHz, DMSO- $d_6$ )  $\delta$  10.04 (s, 2H), 8.47 (d,  $J$  = 8.6 Hz, 4H), 8.25 (d,  $J$  = 8.8 Hz, 2H), 7.80 (d,  $J$  = 8.6 Hz, 4H), 7.66 (s, 2H), 7.31 (d,  $J$  = 8.8 Hz, 2H), 2.40 (s, 6H).  **$^{13}C$  NMR** (100 MHz, DMSO- $d_6$ )  $\delta$  196.2, 154.0, 146.7, 143.8, 138.1, 130.4, 129.4, 124.6, 123.5, 117.0, 115.2, 26.4. **HRMS** (ESI-TOF) for  $C_{28}H_{23}N_4O_2^+$   $[M+H]^+$ : calculated 447.1816, found 447.1840.

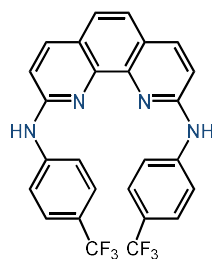**11a** $C_{26}H_{16}F_6N_4$ 

M = 498.43 g/mol

***N*<sup>2</sup>,*N*<sup>9</sup>-bis(4-(trifluoromethyl)phenyl)-1,10-phenanthroline-2,9-diamine (11a)**: Prepared from 2,9-dichloro-1,10-phenanthroline (1.00 g, 4.0 mmol) and 4-(trifluoromethyl)aniline (3.22 g, 20.0 mmol) according to **GPI**. Purification by flash column chromatography on silica gel using petroleum ether and ethyl acetate to afford 10a as a white solid (1.53 g, 77% yield).

**R<sub>f</sub>** = 0.30 (PE/EA = 7/3). **<sup>1</sup>H NMR** (400 MHz, DMSO-*d*<sub>6</sub>) δ 9.98 (s, 2H), 8.56 (d, *J* = 8.6 Hz, 4H), 8.20 (d, *J* = 8.8 Hz, 2H), 7.60 (s, 2H), 7.50 (d, *J* = 8.6 Hz, 4H), 7.29 (d, *J* = 8.8 Hz, 2H). **<sup>13</sup>C NMR** (100 MHz, DMSO-*d*<sub>6</sub>) δ 153.66, 145.29, 143.34, 137.63, 126.10, 126.05, 124.09, 123.40, 122.91, 120.47, 120.15, 117.06, 114.61. **HRMS** (ESI-TOF) for C<sub>26</sub>H<sub>17</sub>F<sub>6</sub>N<sub>4</sub><sup>+</sup> [M+H]<sup>+</sup>: calculated 499.1352, found 499.1373.

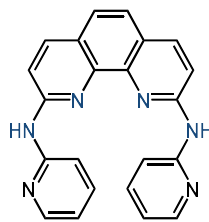

**12a**  
 $C_{22}H_{16}N_6$   
M = 364.41 g/mol

***N*<sup>2</sup>,*N*<sup>9</sup>-di(pyridin-2-yl)-1,10-phenanthroline-2,9-diamine (12a)**: Prepared from 2,9-dichloro-1,10-phenanthroline (1.00 g, 4.0 mmol) and pyridin-2-amine (1.88 g, 20.0 mmol) according to **GPI**. Purification by flash column chromatography on silica gel using dichloromethane and ethanol to afford **12a** as a yellow solid (0.46 g, 31% yield).

**R<sub>f</sub>** = 0.20 (DCM/EtOH = 40/1). **<sup>1</sup>H NMR** (400 MHz, CDCl<sub>3</sub>) δ 8.42–7.92 (m, 8H), 7.83 (d, *J* = 8.8 Hz, 2H), 7.64–7.50 (m, 4H), 6.91 (s, 2H). **HRMS** (ESI-TOF) for C<sub>22</sub>H<sub>17</sub>N<sub>6</sub><sup>+</sup> [M+H]<sup>+</sup>: calculated 365.1509, found 365.1518.

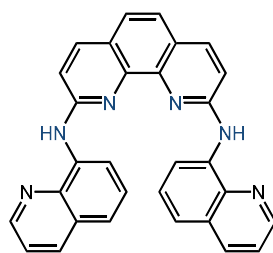

**13a**  
 $C_{30}H_{20}N_6$   
 $M = 464.53 \text{ g/mol}$

***N*<sup>2</sup>,*N*<sup>9</sup>-di(quinolin-8-yl)-1,10-phenanthroline-2,9-diamine (13a)**: Prepared from 2,9-dichloro-1,10-phenanthroline (1.00 g, 4.0 mmol) and quinolin-8-amine (2.88 g, 20.0 mmol) according to **GP1**. Purification by flash column chromatography on silica gel using petroleum ether and ethyl acetate to afford **13a** as a yellow solid (1.24 g, 67% yield).

$R_f = 0.30$  (PE/EA = 3/7). **<sup>1</sup>H NMR** (400 MHz,  $CDCl_3$ )  $\delta$  10.16 (dd,  $J = 7.8, 1.2$  Hz, 2H), 9.72 (s, 2H), 8.88 (dd,  $J = 4.2, 1.8$  Hz, 2H), 8.20 (dd,  $J = 8.2, 1.8$  Hz, 2H), 8.09 (d,  $J = 8.6$  Hz, 2H), 7.59 (t,  $J = 8.0$  Hz, 2H), 7.55 (s, 2H), 7.48 (dd,  $J = 8.2, 4.2$  Hz, 2H), 7.42 (dd,  $J = 8.2, 1.2$  Hz, 2H), 7.31 (d,  $J = 8.6$  Hz, 2H). **<sup>13</sup>C NMR** (100 MHz,  $CDCl_3$ )  $\delta$  154.0, 147.6, 144.7, 138.8, 137.6, 137.4, 136.6, 129.2, 128.4, 124.6, 123.1, 121.6, 118.4, 115.1, 113.9. **HRMS** (ESI-TOF) for  $C_{30}H_{21}N_6^+$   $[M+H]^+$ : calculated 465.1822, found 465.1818.

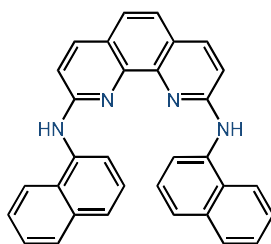

**14a**  
 $C_{32}H_{22}N_4$   
 $M = 462.56 \text{ g/mol}$

***N*<sup>2</sup>,*N*<sup>9</sup>-di(naphthalen-1-yl)-1,10-phenanthroline-2,9-diamine (14a)**: Prepared from 2,9-dichloro-1,10-phenanthroline (1.00 g, 4.0 mmol) and naphthalen-1-amine (2.86 g, 20.0 mmol) according to **GP1**. Purification by flash column chromatography on silica gel using petroleum ether and ethyl acetate to afford **14a** as a yellow solid (1.29 g, 70% yield).

$R_f = 0.30$  (PE/EA = 3/7). **<sup>1</sup>H NMR** (400 MHz,  $CDCl_3$ )  $\delta$  8.18 (d,  $J = 8.2$  Hz, 2H), 7.96–7.85 (m, 4H), 7.76 (d,  $J = 8.2$  Hz, 2H), 7.57–7.45 (m, 8H), 7.42 (s, 2H), 6.94 (d,  $J = 8.8$  Hz, 2H). **<sup>13</sup>C NMR** (100 MHz,  $CDCl_3$ )  $\delta$  157.0, 144.5, 138.3, 136.3, 134.9, 130.0, 128.6, 126.6, 126.6, 126.1, 126.1, 124.3, 122.9, 122.6, 121.3, 110.9. **HRMS** (ESI-TOF) for  $C_{32}H_{23}N_4^+$   $[M+H]^+$ : calculated 463.1917, found 463.1920.

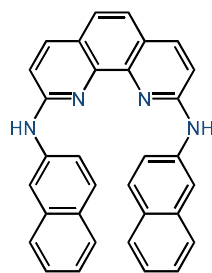

**15a**  
 $C_{32}H_{22}N_4$   
M = 462.56 g/mol

**$N^2,N^9$ -di(naphthalen-2-yl)-1,10-phenanthroline-2,9-diamine (15a)**: Prepared from 2,9-dichloro-1,10-phenanthroline (1.00 g, 4.0 mmol) and naphthalen-2-amine (2.86 g, 20.0 mmol) according to **GPI**. Purification by flash column chromatography on silica gel using petroleum ether and ethyl acetate to afford **15a** as a yellow solid (0.650 g, 35% yield).

$R_f$  = 0.30 (PE/EA = 3/1).  $^1H$  NMR (400 MHz, DMSO- $d_6$ )  $\delta$  9.70 (s, 2H), 8.81 (d,  $J$  = 2.2 Hz, 2H), 8.30 (dd,  $J$  = 8.8, 2.2 Hz, 2H), 8.19 (d,  $J$  = 8.8 Hz, 2H), 7.59 (s, 2H), 7.51 (t,  $J$  = 8.8 Hz, 4H), 7.30 (d,  $J$  = 8.8 Hz, 2H), 7.18 (d,  $J$  = 8.2 Hz, 2H), 7.07 (ddd,  $J$  = 8.2, 6.8, 1.2 Hz, 2H), 6.84 (ddd,  $J$  = 8.2, 6.8, 1.2 Hz, 2H).  $^{13}C$  NMR (100 MHz, DMSO- $d_6$ )  $\delta$  154.09, 143.75, 139.38, 137.20, 134.00, 128.64, 128.34, 126.94, 126.86, 125.31, 123.71, 122.83, 122.39, 119.75, 114.40, 112.19. HRMS (ESI-TOF) for  $C_{32}H_{23}N_4^+$  [M+H] $^+$ : calculated 463.1917, found 463.1920.

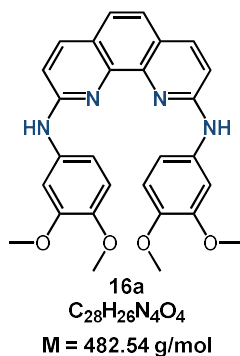

*N*<sup>2</sup>,*N*<sup>9</sup>-bis(3,4-dimethoxyphenyl)-1,10-phenanthroline-2,9-diamine (**16a**): Prepared from 2,9-dichloro-1,10-phenanthroline (1.00 g, 4.0 mmol) and 3,4-dimethoxyaniline (3.06 g, 20.0 mmol) according to **GPI**. Purification by flash column chromatography on silica gel using petroleum ether and ethyl acetate to afford **16a** as a dark yellow solid (0.370 g, 19% yield).

$R_f = 0.20$  (PE/EA = 1/1). **<sup>1</sup>H NMR** (400 MHz, CDCl<sub>3</sub>)  $\delta$  9.24 (s, 2H), 8.17 (dd,  $J = 8.8, 2.4$  Hz, 2H), 8.06 (d,  $J = 8.8$  Hz, 2H), 7.48 (s, 2H), 7.39 (d,  $J = 2.4$  Hz, 2H), 7.10 (d,  $J = 8.8$  Hz, 2H), 6.65 (d,  $J = 8.8$  Hz, 2H), 3.66 (s, 6H), 3.64 (s, 6H). **<sup>13</sup>C NMR** (100 MHz, CDCl<sub>3</sub>)  $\delta$  156.1, 149.5, 146.2, 138.1, 133.5, 123.9, 122.1, 115.2, 111.8, 110.3, 107.7, 56.2, 55.9. **HRMS** (ESI-TOF) for  $C_{28}H_{27}N_4O_4^+$   $[M+H]^+$ : calculated 483.2027, found 483.2026.

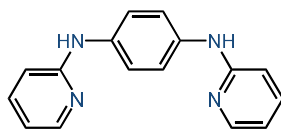**17a**C<sub>16</sub>H<sub>14</sub>N<sub>4</sub>

M = 262.32 g/mol

**N<sup>1</sup>,N<sup>4</sup>-di(pyridin-2-yl)benzene-1,4-diamine (17a)**: Prepared from *p*-phenylenediamine (0.430 g, 4.0 mmol) and 2-chloropyridine (1.14 g, 10.0 mmol) according to **GP2**. Purification by flash column chromatography on silica gel using petroleum ether and ethyl acetate to afford **17a** as a grey solid (0.760 g, 72% yield).

**R<sub>f</sub>** = 0.30 (EA). **<sup>1</sup>H NMR** (400 MHz, DMSO-*d*<sub>6</sub>) δ 11.12 (s, 2H), 8.05–7.96 (m, 4H), 7.53 (s, 4H), 7.32 (d, *J* = 8.8 Hz, 2H), 7.01 (t, *J* = 6.6 Hz, 2H). **<sup>13</sup>C NMR** (100 MHz, DMSO-*d*<sub>6</sub>) δ 152.2, 143.6, 138.0, 134.3, 125.3, 114.0, 113.3. **HRMS** (ESI-TOF) for C<sub>16</sub>H<sub>15</sub>N<sub>4</sub><sup>+</sup> [M+H]<sup>+</sup>: calculated 263.1291, found 263.1292.

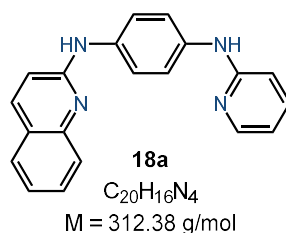

***N*<sup>1</sup>-(pyridin-2-yl)-*N*<sup>4</sup>-(quinolin-2-yl)benzene-1,4-diamine (18a)**: Prepared from *p*-phenylenediamine (0.430 g, 4.0 mmol), 2-chloropyridine (0.450 g, 4.0 mmol) and 2-chloroquinoline (0.650 g, 4.0 mmol) according to **GP3**. Purification by flash column chromatography on silica gel using petroleum ether and ethyl acetate to afford **18a** as a yellow solid (1.02 g, 82% yield).

**R<sub>f</sub>** = 0.30 (EA) **<sup>1</sup>H NMR** (400 MHz, DMSO-*d*<sub>6</sub>) δ 9.27 (s, 1H), 8.88 (s, 1H), 8.15–8.07 (m, 1H), 7.99 (d, *J* = 9.0 Hz, 1H), 7.87 (d, *J* = 9.0 Hz, 2H), 7.74–7.58 (m, 4H), 7.57–7.48 (m, 2H), 7.29–7.18 (m, 1H), 7.01 (d, *J* = 9.0 Hz, 1H), 6.82–6.74 (m, 1H), 6.71–6.62 (m, 1H). **<sup>13</sup>C NMR** (100 MHz, DMSO-*d*<sub>6</sub>) δ 156.2, 154.3, 147.3, 147.2, 137.0, 136.6, 135.6, 134.9, 129.3, 127.4, 126.1, 123.4, 122.2, 119.2, 118.9, 114.0, 113.6, 110.0. **HRMS** (ESI-TOF) for C<sub>20</sub>H<sub>17</sub>N<sub>4</sub><sup>+</sup> [M+H]<sup>+</sup>: calculated 313.1448, found 313.1450.

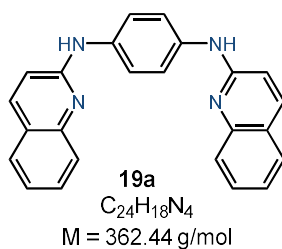

***N*<sup>1</sup>,*N*<sup>4</sup>-di(quinolin-2-yl)benzene-1,4-diamine (19a)**: Prepared from *p*-phenylenediamine (0.430 g, 4.0 mmol) and 2-chloroquinoline (1.64 g, 10.0 mmol) according to **GP2**. Purification by flash column chromatography on silica gel using petroleum ether and ethyl acetate to afford **19a** as a yellow solid (1.19 g, 82% yield).

$R_f = 0.30$  (EA). **<sup>1</sup>H NMR** (400 MHz, Methanol-*d*<sub>4</sub>)  $\delta$  8.06 (d,  $J = 9.2$  Hz, 2H), 7.71–7.64 (m, 8H), 7.59–7.53 (m, 2H), 7.33–7.27 (m, 2H), 7.00 (d,  $J = 9.2$  Hz, 2H). **<sup>13</sup>C NMR** (100 MHz, Methanol-*d*<sub>4</sub>)  $\delta$  160.4, 155.4, 141.4, 137.1, 132.3, 129.3, 125.5, 124.8, 124.0, 114.9. **HRMS** (ESI-TOF) for  $C_{24}H_{19}N_4^+$   $[M+H]^+$ : calculated 363.1603, found 363.1611.

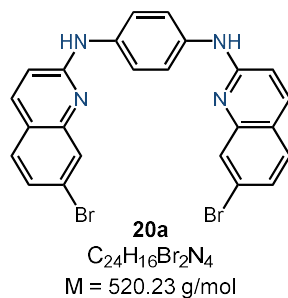

***N*<sup>1</sup>,*N*<sup>4</sup>-bis(7-bromoquinolin-2-yl)benzene-1,4-diamine (20a):** Prepared from *p*-phenylenediamine (0.430 g, 4.0 mmol) and 7-bromo-2-chloroquinoline (2.43 g, 10.0 mmol) according to **GP2**. Purification by flash column chromatography on silica gel using petroleum ether, dichloromethane and ethyl acetate to afford **20a** as a dark green solid (1.20 g, 58% yield). **R<sub>f</sub>** = 0.60 (DCM/EA = 1/1). **<sup>1</sup>H NMR** (400 MHz, DMSO-*d*<sub>6</sub>) δ 9.51 (s, 2H), 8.03 (d, *J* = 9.0 Hz, 2H), 7.95 (s, 4H), 7.89 (d, *J* = 2.0 Hz, 2H), 7.67 (d, *J* = 8.6 Hz, 2H), 7.40 (dd, *J* = 8.6, 2.0 Hz, 2H), 7.07 (d, *J* = 9.0 Hz, 2H). **<sup>13</sup>C NMR** (100 MHz, DMSO-*d*<sub>6</sub>) δ 155.3, 148.7, 137.0, 135.7, 129.8, 128.5, 125.6, 123.0, 122.7, 119.7, 115.1. **HRMS** (ESI-TOF) for C<sub>24</sub>H<sub>17</sub>N<sub>4</sub><sup>+</sup> [M+H]<sup>+</sup>: calculated 518.9814, found 518.9817.

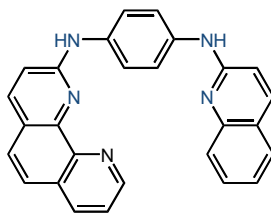

**21a**  
 $C_{27}H_{19}N_5$   
 $M = 413.48 \text{ g/mol}$

***N*<sup>1</sup>-(1,10-phenanthrolin-2-yl)-*N*<sup>4</sup>-(quinolin-2-yl)benzene-1,4-diamine (21a)**: repared from *p*-phenylenediamine (0.430 g, 4.0 mmol), 2-chloroquinoline (0.650 g, 4.0 mmol) and 2-chloro-1,10-phenanthroline (0.860 g, 4.0 mmol) according to **GP3**. Purification by flash column chromatography on silica gel using petroleum ether and ethyl acetate to afford **21a** as a yellow solid (1.16 g, 70% yield).

$R_f = 0.20$  (EA). **<sup>1</sup>H NMR** (400 MHz,  $CDCl_3$ )  $\delta$  9.13 (dd,  $J = 4.4, 1.8$  Hz, 1H), 8.21 (dd,  $J = 8.2, 1.8$  Hz, 1H), 8.02 (d,  $J = 8.8$  Hz, 1H), 7.93 (d,  $J = 8.8$  Hz, 1H), 7.79 (dd,  $J = 8.4, 1.1$  Hz, 1H), 7.69–7.62 (m, 4H), 7.62–7.53 (m, 3H), 7.45–7.33 (m, 3H), 7.33–7.28 (m, 2H), 6.97 (d,  $J = 8.8$  Hz, 1H), 6.94–6.83 (m, 1H). **<sup>13</sup>C NMR** (100 MHz,  $CDCl_3$ )  $\delta$  156.2, 154.4, 149.6, 147.6, 145.1, 138.1, 137.8, 136.7, 136.0, 135.1, 129.9, 129.4, 127.5, 126.7, 126.5, 124.1, 123.6, 123.4, 123.2, 122.6, 122.1, 121.9, 111.8, 110.1. **HRMS** (ESI-TOF) for  $C_{27}H_{20}N_5^+$   $[M+H]^+$ : calculated 414.1713, found 414.1715.

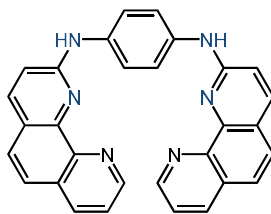

**22a**  
 $C_{30}H_{20}N_6$   
 $M = 464.53 \text{ g/mol}$

***N*<sup>1</sup>,*N*<sup>4</sup>-di(1,10-phenanthrolin-2-yl)benzene-1,4-diamine (22a)**: Prepared from *p*-phenylenediamine (0.430 g, 4.0 mmol) and 2-chloro-1,10-phenanthroline (2.15 g, 10.0 mmol) according to **GP2**. Purification by flash column chromatography on silica gel using petroleum ether and ethyl acetate to afford **22a** as a grey solid (1.49 g, 80% yield).

**R<sub>f</sub>** = 0.20 (EA). **<sup>1</sup>H NMR** (400 MHz, DMSO-*d*<sub>6</sub>) δ 9.73–9.54 (m, 2H), 9.23–9.08 (m, 2H), 8.51–8.35 (m, 2H), 8.35–8.12 (m, 6H), 7.90–7.64 (m, 6H), 7.38–7.20 (m, 2H). **<sup>13</sup>C NMR** (100 MHz, DMSO-*d*<sub>6</sub>) δ 154.8, 149.4, 146.0, 145.3, 138.0, 136.0, 134.9, 129.0, 126.5, 122.6, 121.7, 119.1, 113.7. **HRMS** (ESI-TOF) for  $C_{30}H_{21}N_6^+$  [ $M+H$ ]<sup>+</sup>: calculated 465.1822, found 465.1829.

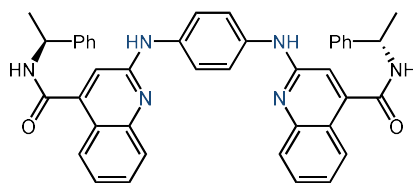

**23a**  
 $C_{42}H_{36}N_6O_2$   
 $M = 656.29 \text{ g/mol}$

**2,2'-(1,4-phenylenebis(azanediyl))bis(N-((S)-1-phenylethyl)quinoline-4-carboxamide)**

**(23a)**: Prepared from *p*-phenylenediamine (0.430 g, 4.0 mmol) and (*S*)-2-chloro-*N*-(1-phenylethyl)quinoline-4-carboxamide (3.11 g, 10.0 mmol) according to **GP2**. Purification by flash column chromatography on silica gel using petroleum ether and ethyl acetate to afford **23a** as a yellow solid (1.84 g, 70% yield).

$R_f = 0.50$  (PE/EA = 4/1).  $^1\text{H NMR}$  (400 MHz, DMSO- $d_6$ )  $\delta$  8.67 (s, 2H), 8.39 (d,  $J = 8.0$  Hz, 2H), 7.12 (s, 4H), 6.94 (dd,  $J = 8.4, 1.4$  Hz, 2H), 6.89 (dd,  $J = 8.4, 1.4$  Hz, 2H), 6.75 (td,  $J = 8.0, 1.6$  Hz, 2H), 6.66–6.59 (m, 4H), 6.55 (t,  $J = 7.6$  Hz, 4H), 6.49–6.38 (m, 4H), 6.24 (s, 2H), 4.46–4.38 (m, 2H), 1.66 (m, 6H).  $^{13}\text{C NMR}$  (100 MHz, DMSO- $d_6$ )  $\delta$  166.4, 154.0, 148.0, 145.0, 143.7, 135.8, 130.1, 128.9, 127.3, 127.1, 126.5, 125.4, 123.2, 120.5, 119.6, 112.5, 48.9, 22.9.

**HRMS** (ESI-TOF) for  $C_{42}H_{36}N_6O_2^+ [M+H]^+$ : calculated 657.2973, found 657.2972.

## 4 Experimental Details for the Aza[5–9]helicenes

### 4.1 General Procedure for Synthesis of Helicenes Type 1 (GP4)

To a 15.0 mL Schlenk tube equipped with a magnetic stir bar were added the pre-prepared substrate (0.10 mmol, 1.00 equiv.),  $n\text{Bu}_4\text{NBF}_4$  (0.50 mmol, 5.00 equiv.), and HFIP (2.50 mL) in sequence. Platinum plate ( $10 \times 15 \times 1 \text{ mm}^3$ ) and graphite felt ( $10 \times 15 \times 3 \text{ mm}^3$ ) were used as the cathode and anode, respectively. Constant current electrolysis (5.0 mA) was carried out at room temperature for 2 h. After the reaction completed as monitored with TLC, the electrodes were washed with DCM (10.0 mL) and EtOH (10.0 mL), and the washings were combined with the reaction solution. The solvent was removed under reduced pressure, and the crude residue was purified by column chromatography on silica gel to afford the desired product.

### 4.2 General Procedure for Synthesis of Helicenes Type 2 (GP5)

For electron-deficient substrates, only HFIP afforded the product in 23% yield, while other alcohol solvents resulted in trace conversion. However, the HFIP/ $\text{H}_2\text{O}$  (5/1) mixed solvent supplies protons for cathodic hydrogen evolution, thereby facilitating the anodic oxidation.

To a 15.0 mL Schlenk tube equipped with a magnetic stir bar were added the pre-prepared substrate (0.10 mmol, 1.00 equiv.),  $n\text{Bu}_4\text{NBF}_4$  (0.60 mmol, 6.0 equiv.), and HFIP/ $\text{H}_2\text{O}$  (5/1, 3.00 mL) in sequence. Platinum plate ( $10 \times 15 \times 1 \text{ mm}^3$ ) and graphite felt ( $10 \times 15 \times 3 \text{ mm}^3$ ) were used as the cathode and anode, respectively. Constant current electrolysis (5.0 mA) was carried out at room temperature for 2 h. After the reaction completed as monitored with TLC, the electrodes were washed with DCM (10.0 mL) and EtOH (10.0 mL), and the washings were combined with the reaction solution. The solvent was removed under reduced pressure, and the crude residue was purified by column chromatography on silica gel to afford the desired product.

### 4.3 General Procedure for Synthesis of Helicenes Type 3 (GP6)

To a 15.0 mL Schlenk tube equipped with a magnetic stir bar were added the pre-prepared substrate (0.10 mmol, 1.00 equiv.),  $n\text{Bu}_4\text{NBF}_4$  (0.50 mmol, 5.00 equiv.),  $n\text{Bu}_4\text{NOAc}$  (0.40 mmol, 10.0 equiv.), 1-iodo-4-methoxybenzene (0.050 mmol, 50 mol%), and HFIP (2.50 mL) in sequence. Platinum plate ( $10 \times 15 \times 1 \text{ mm}^3$ ) and graphite felt ( $10 \times 15 \times 3 \text{ mm}^3$ ) were used as the cathode and anode, respectively. Constant current electrolysis (10.0 mA) was carried out at room temperature for 2 h. After the reaction completed as monitored with TLC, the electrodes were washed with DCM (10.0 mL) and EtOH (10.0 mL), and the washings were combined with the reaction solution. The solvent was removed under reduced pressure, and the crude residue was purified by column chromatography on silica gel to afford the desired product.

### 4.4 Gram-Scale Experiment

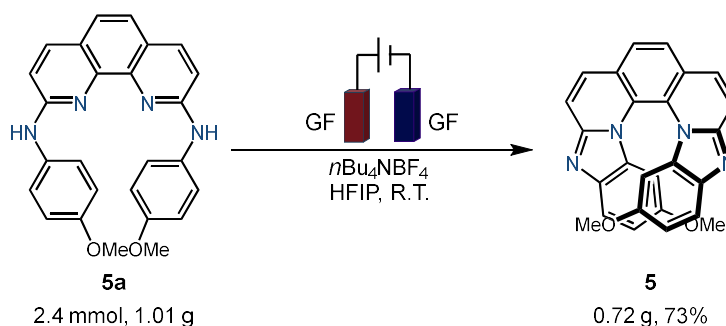

Given the broad substrate scope of the electrochemical oxidative C-N coupling strategy for the construction of azahelicenes, we further evaluated its practicality. Using **5a** as the model substrate, the reaction was successfully scaled up by 24-fold (2.40 mmol, 1.01 g). Notably, although a Pt plate had provided slightly higher yields during optimization, a graphite felt (GF) cathode was selected for scale-up, as both electrodes required proportional enlargement and GF allows for easier expansion to larger surface areas.

To a 100 mL Schlenk flask equipped with a magnetic stir bar were added the substrate **5a** (2.40 mmol, 1.01 g),  $n\text{Bu}_4\text{NBF}_4$  (12.0 mmol, 3.95 g), and HFIP (60.0 mL) in sequence. Graphite felts ( $40 \times 75 \times 3 \text{ mm}^3$ ) were used as the cathode and anode. Constant current electrolysis (80 mA) was carried out at room temperature for 5 h. After the reaction completed as monitored with TLC, the electrodes were washed with DCM (30.0 mL) and EtOH (30.0 mL), and the washings were combined with the reaction solution. The solvent was removed under reduced pressure.

Purification by flash column chromatography on silica gel using petroleum ether and ethyl acetate to afford **5** as a yellow solid (0.720 g, 73% yield).

#### 4.5 Characterization Data of the Helicenes

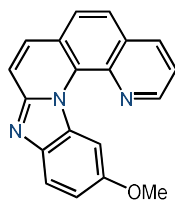

**1**  
C<sub>19</sub>H<sub>13</sub>N<sub>3</sub>O  
M = 299.33 g/mol

**12-methoxybenzo[4,5]imidazo[1,2-*a*][1,10]phenanthroline (1):** Prepared from **1a** (30.1 mg, 0.10 mmol), *n*Bu<sub>4</sub>NBF<sub>4</sub> (165 mg, 0.50 mmol), and HFIP (2.50 mL) according to **GP4**. Purification by flash column chromatography on silica gel using petroleum ether and ethyl acetate to afford **1** as a yellow solid (23.8 mg, 80% yield).

**R<sub>f</sub>** = 0.30 (EA). **<sup>1</sup>H NMR** (400 MHz, CDCl<sub>3</sub>) δ 9.06 (dd, *J* = 4.2, 1.8 Hz, 1H), 8.44 (d, *J* = 2.6 Hz, 1H), 8.30 (dd, *J* = 8.2, 1.8 Hz, 1H), 7.89 (d, *J* = 9.0 Hz, 1H), 7.82–7.76 (m, 3H), 7.67–7.58 (m, 2H), 7.22 (dd, *J* = 9.0, 2.6 Hz, 1H), 3.93 (s, 3H). **<sup>13</sup>C NMR** (100 MHz, CDCl<sub>3</sub>) δ 153.9, 149.1, 147.0, 149.9, 139.2, 136.4, 133.8, 133.0, 128.8, 128.5, 127.2, 124.8, 124.5, 122.4, 120.0, 119.9, 115.3, 103.6, 55.9. **HRMS** (ESI-TOF) for C<sub>19</sub>H<sub>14</sub>N<sub>3</sub>O<sup>+</sup> [M+H]<sup>+</sup>: calculated 300.1131, found 300.1132.

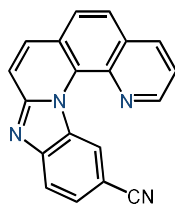

**2**  
 $C_{19}H_{10}N_4$   
 $M = 294.32 \text{ g/mol}$

**Benzo[4,5]imidazo[1,2-*a*][1,10]phenanthroline-12-carbonitrile (2):** Prepared from **2a** (2 9.6 mg, 0.10 mmol),  $n\text{Bu}_4\text{NBF}_4$  (198 mg, 0.60 mmol), and HFIP/ $\text{H}_2\text{O}$  (5/1, 3.00 mL) according to **GP5**. Purification by flash column chromatography on silica gel using petroleum ether and ethyl acetate to afford **2** as a yellow solid (15.8 mg, 54% yield).

$R_f = 0.300$  (PE/EA = 3/7).  $^1\text{H NMR}$  (400 MHz,  $\text{CDCl}_3$ )  $\delta$  9.61–9.53 (m, 1H), 9.18 (dd,  $J = 4.2, 1.8 \text{ Hz}$ , 1H), 8.42 (dd,  $J = 8.4, 1.8 \text{ Hz}$ , 1H), 8.04 (d,  $J = 8.4 \text{ Hz}$ , 1H), 7.99–7.91 (m, 4H), 7.79–7.72 (m, 2H).  $^{13}\text{C NMR}$  (100 MHz,  $\text{CDCl}_3$ )  $\delta$  151.7, 148.0, 147.9, 138.9, 136.7, 133.3, 132.2, 129.9, 128.8, 127.6, 127.2, 125.9, 125.6, 124.9, 123.3, 120.7, 120.6, 119.6, 102.6. **HRMS** (ESI-TOF) for  $C_{19}H_{11}N_4^+$  [ $M+H$ ] $^+$ : calculated 295.0978, found 295.0983.

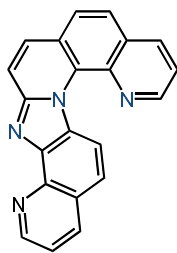

**3**  
 $C_{21}H_{12}N_4$   
 $M = 320.36 \text{ g/mol}$

**Quinolino[8',7':4,5]imidazo[1,2-a][1,10]phenanthroline (3):** Prepared from **3a** (32.2 mg, 0.10 mmol),  $nBu_4NBF_4$  (165 mg, 0.50 mmol), and HFIP (2.50 mL) according to **GP4**. Purification by flash column chromatography on silica gel using petroleum ether and ethyl acetate to afford **3** as a yellow solid (12.8 mg, 40% yield).

$R_f = 0.30$  (EA).  $^1H$  NMR (400 MHz,  $CDCl_3$ )  $\delta$  9.16–9.08 (m, 2H), 9.03 (d,  $J = 9.4$  Hz, 1H), 8.39 (dd,  $J = 8.2, 1.8$  Hz, 1H), 8.35 (dd,  $J = 8.2, 1.8$  Hz, 1H), 8.12 (d,  $J = 9.2$  Hz, 1H), 7.98–7.91 (m, 2H), 7.84 (d,  $J = 9.2$  Hz, 1H), 7.71–7.64 (m, 2H), 7.55 (dd,  $J = 8.2, 4.4$  Hz, 1H).  $^{13}C$  NMR (100 MHz,  $CDCl_3$ )  $\delta$  149.6, 148.8, 147.6, 136.3, 135.7, 132.7, 132.6, 128.8, 128.3, 127.3, 126.1, 125.3, 125.0, 122.6, 121.1, 120.7, 120.4, 119.0. HRMS (ESI-TOF) for  $C_{21}H_{13}N_4^+$   $[M+H]^+$ : calculated 321.1135, found 321.1132.

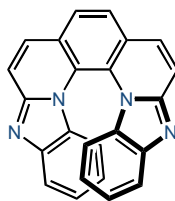

**4**  
 $C_{24}H_{14}N_4$   
M = 358.40 g/mol

**Benzo[4,5]imidazo[1,2-*a*]benzo[4,5]imidazo[2,1-*k*][1,10]phenanthroline (4)**: Prepared from **4a** (36.2 mg, 0.10 mmol),  $nBu_4NBF_4$  (165 mg, 0.50 mmol), and HFIP (2.50 mL) according to **GP4**. Purification by flash column chromatography on silica gel using dichloromethane and methanol to afford **4** as a yellow solid (28.9 mg, 81% yield).

$R_f$  = 0.30 (DCM/MeOH = 50/1).  $^1H$  NMR (400 MHz, DMSO- $d_6$ )  $\delta$  8.24–8.16 (m, 4H), 7.99 (d,  $J$  = 9.4 Hz, 2H), 7.72 (d,  $J$  = 8.4 Hz, 2H), 7.10 (ddd,  $J$  = 8.2, 7.2, 1.2 Hz, 2H), 6.50 (ddd,  $J$  = 8.2, 7.2, 1.2 Hz, 2H), 5.88 (d,  $J$  = 8.4 Hz, 2H).  $^{13}C$  NMR (100 MHz, DMSO- $d_6$ )  $\delta$  147.6, 142.7, 132.3, 130.3, 125.5, 125.1, 124.1, 121.5, 120.8, 119.3, 118.8, 112.2. **HRMS** (ESI-TOF) for  $C_{24}H_{15}N_4^+$   $[M+H]^+$ : calculated 359.1291, found 359.1296.

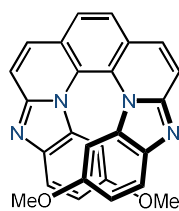**5** $C_{26}H_{18}N_4O_2$   
M = 418.46 g/mol

**10,15-dimethoxybenzo[4,5]imidazo[1,2-a]benzo[4,5]imidazo[2,1-k][1,10]phenanthroline (5):** Prepared from **5a** (42.2 mg, 0.10 mmol),  $nBu_4NBF_4$  (165 mg, 0.50 mmol), and HFIP (2.50 mL) according to **GP4**. Purification by flash column chromatography on silica gel using dichloromethane and methanol to afford **5** as a yellow solid (3.54 mg, 85% yield).

$R_f = 0.30$  (DCM/MeOH = 40/1).  $^1H$  NMR (400 MHz,  $CDCl_3$ )  $\delta$  7.93 (s, 2H), 7.87 (d,  $J = 9.4$  Hz, 2H), 7.81 (d,  $J = 9.4$  Hz, 2H), 7.69 (d,  $J = 9.0$  Hz, 2H), 6.82 (dd,  $J = 9.0, 2.4$  Hz, 2H), 5.35 (d,  $J = 2.4$  Hz, 2H), 3.16 (s, 6H).  $^{13}C$  NMR (100 MHz,  $DMSO-d_6$ )  $\delta$  153.9, 147.2, 137.0, 133.0, 129.1, 125.5, 125.0, 121.4, 119.7, 118.7, 115.0, 94.7, 54.4. **HRMS** (ESI-TOF) for  $C_{26}H_{19}N_4O_2^+$   $[M+H]^+$ : calculated 419.1503, found 419.1538.

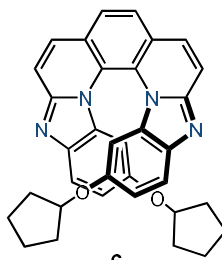

**6**  
 $C_{34}H_{30}N_4O_2$   
 $M = 526.64 \text{ g/mol}$

**10,15-bis(cyclopentyloxy)benzo[4,5]imidazo[1,2-a]benzo[4,5]imidazo[2,1-k][1,10]phenanthroline (6):** Prepared from **6a** (53.1 mg, 0.10 mmol),  $n\text{Bu}_4\text{NBF}_4$  (165 mg, 0.50 mmol), and HFIP (2.50 mL) according to **GP4**. Purification by flash column chromatography on silica gel using petroleum ether and ethyl acetate to afford **6** as a yellow solid (42.1 mg, 80% yield).

$R_f = 0.30$  (PE/EA = 1/1).  $^1\text{H NMR}$  (400 MHz,  $\text{CDCl}_3$ )  $\delta$  7.89 (s, 2H), 7.85 (d,  $J = 9.4$  Hz, 2H), 7.78 (d,  $J = 9.4$  Hz, 2H), 7.68 (d,  $J = 9.0$  Hz, 2H), 6.81 (dd,  $J = 9.0, 2.4$  Hz, 2H), 5.54 (d,  $J = 2.4$  Hz, 2H), 3.90 (m, 2H), 1.71–1.45 (m, 16H).  $^{13}\text{C NMR}$  (100 MHz,  $\text{CDCl}_3$ )  $\delta$  153.8, 147.5, 137.6, 133.5, 128.6, 125.8, 124.5, 122.2, 120.3, 119.0, 117.0, 98.2, 80.6, 32.9, 32.5, 24.0, 23.9. **HRMS** (ESI-TOF) for  $C_{34}H_{31}N_4O_2^+$   $[M+H]^+$ : calculated 527.2442, found 527.2440.

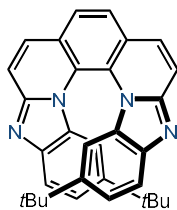

7

 $C_{32}H_{30}N_4$ 

M = 470.62 g/mol

**10,15-di-tert-butylbenzo[4,5]imidazo[1,2-a]benzo[4,5]imidazo[2,1-k][1,10]phenanthroline (7):** Prepared from **7a** (47.5 mg, 0.10 mmol),  $nBu_4NBF_4$  (165 mg, 0.50 mmol), and HFIP (2.50 mL) according to **GP4**. Purification by flash column chromatography on silica gel using petroleum ether and ethyl acetate to afford **7** as a yellow solid (30.0 mg, 64% yield).

$R_f$  = 0.30 (EA).  $^1H$  NMR (400 MHz,  $CDCl_3$ )  $\delta$  7.96–7.88 (m, 4H), 7.85 (d,  $J$  = 9.4 Hz, 2H), 7.73 (d,  $J$  = 8.8 Hz, 2H), 7.23 (dd,  $J$  = 8.8, 1.8 Hz, 2H), 5.95 (d,  $J$  = 1.8 Hz, 2H), 0.84 (s, 18H).  $^{13}C$  NMR (100 MHz,  $CDCl_3$ )  $\delta$  148.1, 145.2, 141.1, 132.9, 129.4, 126.0, 124.8, 123.4, 122.7, 119.5, 119.3, 108.9, 34.8, 31.1. HRMS (ESI-TOF) for  $C_{32}H_{31}N_4^+$   $[M+H]^+$ : calculated 471.2543, found 471.2567.

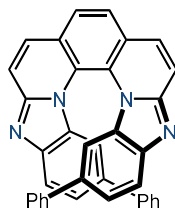**8** $C_{36}H_{22}N_4$   
M = 510.60 g/mol**10,15-diphenylbenzo[4,5]imidazo[1,2-a]benzo[4,5]imidazo[2,1-k][1,10]phenanthroline**

**(8)**: Prepared from **8a** (51.5 mg, 0.10 mmol), *n*Bu<sub>4</sub>NBF<sub>4</sub> (165 mg, 0.50 mmol), and H FIP (2.50 mL) according to **GP4**. Purification by flash column chromatography on silica gel using petroleum ether and ethyl acetate to afford **8** as a yellow solid (31.1 mg, 60% yield).

$R_f$  = 0.50 (EA). <sup>1</sup>H NMR (800 MHz, CDCl<sub>3</sub>) δ 7.99 (d, *J* = 9.2 Hz, 2H), 7.97 (s, 2H), 7.92 (d, *J* = 9.2 Hz, 4H), 7.39 (d, *J* = 8.0 Hz, 2H), 7.36 (t, *J* = 7.2 Hz, 4H), 7.24 (d, *J* = 7.2 Hz, 2H), 6.92 (d, *J* = 8.0 Hz, 4H), 6.19 (s, 2H). <sup>13</sup>C NMR (200 MHz, CDCl<sub>3</sub>) δ 148.5, 142.7, 141.0, 135.2, 133.2, 129.8, 128.6, 127.5, 126.9, 126.0, 125.0, 124.9, 122.4, 120.1, 119.4, 111.1.

**HRMS** (ESI-TOF) for C<sub>36</sub>H<sub>23</sub>N<sub>4</sub><sup>+</sup> [M+H]<sup>+</sup>: calculated 511.1917, found 511.1919.

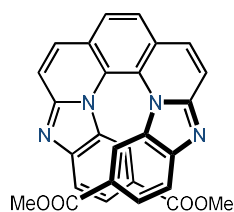**9** $C_{28}H_{18}N_4O_4$ 

M = 474.48 g/mol

**Dimethyl benzo[4,5]imidazo[1,2-*a*]benzo[4,5]imidazo[2,1-*k*][1,10]phenanthroline-10,15-dicarboxylate (9):** Prepared from **9a** (47.9 mg, 0.10 mmol), *n*Bu<sub>4</sub>NBF<sub>4</sub> (198 mg, 0.60 mmol), and HFIP/H<sub>2</sub>O (5/1, 3.00 mL) according to **GP5**. Purification by flash column chromatography on silica gel using petroleum ether and ethyl acetate to afford **9** as a yellow solid (29.3 mg, 62% yield).

**R<sub>f</sub>** = 0.30 (EA). **<sup>1</sup>H NMR** (400 MHz, CDCl<sub>3</sub>) δ 8.07–8.01 (m, 6H), 7.84–7.79 (m, 4H), 6.64–6.59 (m, 2H), 3.73 (s, 6H). **<sup>13</sup>C NMR** (100 MHz, CDCl<sub>3</sub>) δ 166.3, 146.7, 145.9, 131.3, 126.4, 126.0, 122.8, 122.6, 119.7, 119.6, 115.3, 52.2. **HRMS** (ESI-TOF) for C<sub>28</sub>H<sub>19</sub>N<sub>4</sub>O<sub>4</sub><sup>+</sup> [M+H]<sup>+</sup>: calculated 475.1401, found 475.1400.

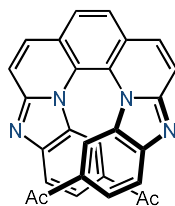**10**C<sub>28</sub>H<sub>18</sub>N<sub>4</sub>O<sub>2</sub>

M = 442.48 g/mol

**1,1'-(benzo[4,5]imidazo[1,2-a]benzo[4,5]imidazo[2,1-k][1,10]phenanthroline-10,15-diyl)bis(ethan-1-one) (10):** Prepared from **10a** (44.7 mg, 0.10 mmol), *n*Bu<sub>4</sub>NBF<sub>4</sub> (198 mg, 0.60 mmol), and HFIP/H<sub>2</sub>O (5/1, 3.00 mL) according to **GP5**. Purification by flash column chromatography on silica gel using ethyl acetate and methanol to afford **10** as a yellow solid 15.6 mg, 35% yield).

**R<sub>f</sub>** = 0.15 (EA). **<sup>1</sup>H NMR** (400 MHz, CDCl<sub>3</sub>) δ 8.11–8.03 (m, 6H), 7.89–7.80 (m, 4H), 6.55 (s, 2H), 2.11 (s, 6H). **<sup>13</sup>C NMR** (100 MHz, CDCl<sub>3</sub>) δ 196.2, 150.1, 146.5, 132.1, 131.4, 130.3, 126.3, 125.7, 124.8, 122.3, 119.8, 119.5, 114.2, 26.0. **HRMS** (ESI-TOF) for C<sub>28</sub>H<sub>19</sub>N<sub>4</sub>O<sub>2</sub><sup>+</sup> [M+H]<sup>+</sup>: calculated 443.1503, found 443.1499.

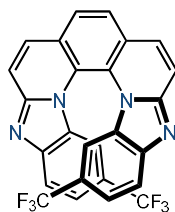

**11**  
 $C_{26}H_{12}F_6N_4$   
 $M = 494.40 \text{ g/mol}$

**10,15-bis(trifluoromethyl)benzo[4,5]imidazo[1,2-a]benzo[4,5]imidazo[2,1-k][1,10]phenanthroline (11):** Prepared from **11a** (49.8 mg, 0.10 mmol),  $n\text{Bu}_4\text{NBF}_4$  (198 mg, 0.60 mmol), and HFIP/ $\text{H}_2\text{O}$  (5/1, 3.00 mL) according to **GP5**. Purification by flash column chromatography on silica gel using petroleum ether and ethyl acetate to afford **11** as a yellow solid 34.4 mg, 70% yield).

$R_f = 0.30$  (EA).  $^1\text{H NMR}$  (400 MHz,  $\text{DMSO}-d_6$ )  $\delta$  8.37 (d,  $J = 9.4$  Hz, 2H), 8.35 (s, 2H), 8.11 (d,  $J = 9.4$  Hz, 2H), 7.89 (d,  $J = 8.6$  Hz, 2H), 7.39 (d,  $J = 8.6$  Hz, 2H), 6.10 (s, 2H).  $^{13}\text{C NMR}$  (100 MHz,  $\text{CDCl}_3$ )  $\delta$  149.55, 145.22, 131.62, 131.15, 126.16, 125.71, 125.64, 125.27, 125.05, 124.80, 123.37, 123.05, 122.23, 122.11, 121.39, 121.36, 120.68, 119.43, 110.13, 110.09.

**HRMS** (ESI-TOF) for  $\text{C}_{26}\text{H}_{13}\text{F}_6\text{N}_4^+ [\text{M}+\text{H}]^+$ : calculated 495.1039, found 495.1062.

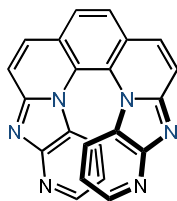**12** $C_{22}H_{12}N_6$   
M = 360.38 g/mol**Pyrido[2',3':4,5]imidazo[1,2-a]pyrido[2',3':4,5]imidazo[2,1-k][1,10]phenanthroline (12):**

Prepared from **12a** (36.4 mg, 0.10 mmol),  $nBu_4NBF_4$  (165 mg, 0.50 mmol),  $nBu_4NO$  Ac (0.40 mmol, 10.0 equiv.), 1-iodo-4-methoxybenzene (0.050 mmol, 50 mol%), and HFIP (2.50 mL) according to **GP6**. Purification by flash column chromatography on silica gel using ethyl acetate and methanol to afford **12** as a yellow solid (20.1 mg, 5.6% yield).

$R_f$  = 0.20 (EA).  $^1H$  NMR (400 MHz, DMSO- $d_6$ )  $\delta$  8.44–8.33 (m, 6H), 8.15 (d,  $J$  = 9.4 Hz, 2H), 6.55 (dd,  $J$  = 8.4, 4.6 Hz, 2H), 6.30 (dd,  $J$  = 8.4, 1.6 Hz, 2H). HRMS (ESI-TOF) for  $C_{22}H_{13}N_6^+$  [M+H] $^+$ : calculated 361.1196, found 361.1197.

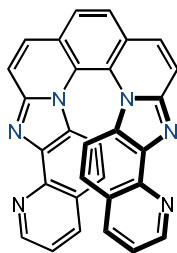**13**C<sub>30</sub>H<sub>16</sub>N<sub>6</sub>

M = 460.50 g/mol

**Quinolino[8',7':4,5]imidazo[1,2-*a*]quinolino[8',7':4,5]imidazo[2,1-*k*][1,10]phenanthroline**

**(13)**: Prepared from **13a** (46.5 mg, 0.10 mmol), *n*Bu<sub>4</sub>NBF<sub>4</sub> (165 mg, 0.50 mmol), and HFIP (2.50 mL) according to **GP4**. Purification by flash column chromatography on silica gel using ethyl acetate and methanol to afford **13** as a yellow solid (27.4 mg, 60% yield).

**R<sub>f</sub>** = 0.20 (EA). **<sup>1</sup>H NMR** (400 MHz, CDCl<sub>3</sub>) δ 9.04 (dd, *J* = 4.4, 1.8 Hz, 2H), 8.20 (d, *J* = 9.4 Hz, 2H), 8.08 (s, 2H), 8.00 (d, *J* = 9.4 Hz, 2H), 7.89 (dd, *J* = 8.2, 1.8 Hz, 2H), 7.37 (dd, *J* = 8.2, 4.4 Hz, 2H), 6.79 (d, *J* = 9.0 Hz, 2H), 6.16 (d, *J* = 9.0 Hz, 2H). **<sup>13</sup>C NMR** (100 MHz, CDCl<sub>3</sub>) δ 150.1, 147.4, 141.6, 140.1, 136.0, 132.2, 128.6, 126.1, 125.5, 125.4, 122.1, 121.5, 121.1, 119.7, 112.9. **HRMS** (ESI-TOF) for C<sub>30</sub>H<sub>17</sub>N<sub>6</sub><sup>+</sup> [M+H]<sup>+</sup>: calculated 461.1509, found 461.1506.

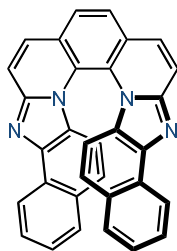

**14**  
 $C_{32}H_{18}N_4$   
M = 458.52 g/mol

**Naphtho[1',2':4,5]imidazo[1,2-*a*]naphtho[1',2':4,5]imidazo[2,1-*k*][1,10]phenanthroline**

(**14**): Prepared from **14a** (46.3 mg, 0.10 mmol),  $nBu_4NBF_4$  (165 mg, 0.50 mmol), and HFIP (2.50 mL) according to **GP4**. Purification by flash column chromatography on silica gel using ethyl acetate and methanol to afford **14** as a yellow solid (15.9 mg, 35% yield).

$R_f$  = 0.30 (EA).  $^1H$  NMR (400 MHz, DMSO- $d_6$ )  $\delta$  8.68 (d,  $J$  = 8.2 Hz, 2H), 8.30 (s, 2H), 8.27–8.17 (m, 4H), 7.68–7.58 (m, 4H), 7.45–7.38 (m, 2H), 6.88 (d,  $J$  = 9.2 Hz, 2H), 6.04 (d,  $J$  = 9.2 Hz, 2H).  $^{13}C$  NMR (100 MHz, DMSO- $d_6$ )  $\delta$  146.7, 139.4, 130.1, 129.2, 128.7, 128.0, 126.3, 125.7, 125.7, 125.6, 125.5, 122.3, 121.4, 121.2, 118.8, 112.2. HRMS (ESI-TOF) for  $C_{32}H_{19}N_4^+$   $[M+H]^+$ : calculated 459.1604, found 459.1616.

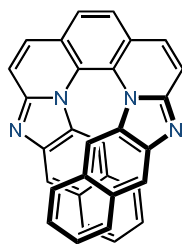

**15**  
 $C_{32}H_{18}N_4$   
 $M = 458.52 \text{ g/mol}$

**Naphtho[2',3':4,5]imidazo[1,2-*a*]naphtho[2',3':4,5]imidazo[2,1-*k*][1,10]phenanthroline (15):** Prepared from **15a** (46.3 mg, 0.10 mmol),  $n\text{Bu}_4\text{NBF}_4$  (165 mg, 0.50 mmol), and HFIP (2.50 mL) according to **GP4**. Purification by flash column chromatography on silica gel using petroleum ether and ethyl acetate to afford **15** as a yellow solid (16.9 mg, 37% yield).

$R_f = 0.20$  (PE/EA = 30/70).  $^1\text{H NMR}$  (400 MHz,  $\text{CDCl}_3$ )  $\delta$  8.21 (s, 2H), 8.12 (d,  $J = 9.2$  Hz, 2H), 8.02 (d,  $J = 9.2$  Hz, 2H), 7.53 (d,  $J = 8.2$  Hz, 2H), 7.29 (s, 4H), 7.20 (ddd,  $J = 8.2, 7.0, 1.2$  Hz, 2H), 6.76 (ddd,  $J = 8.2, 7.0, 1.2$  Hz, 2H), 5.92 (d,  $J = 8.2$  Hz, 2H).  $^{13}\text{C NMR}$  (100 MHz,  $\text{CDCl}_3$ )  $\delta$  147.6, 141.3, 128.4, 128.0, 128.0, 127.4, 126.4, 126.1, 125.4, 125.0, 124.9, 123.8, 122.7, 117.7, 117.4, 116.9. **HRMS** (ESI-TOF) for  $C_{32}H_{19}N_4^+$   $[\text{M}+\text{H}]^+$ : calculated 459.1604, found 459.1618.

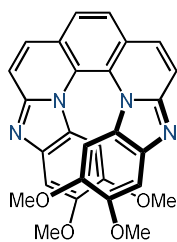

**16**  
 $C_{28}H_{22}N_4O_4$   
 $M = 478.51$  g/mol

**9,10,15,16-tetramethoxybenzo[4,5]imidazo[1,2-a]benzo[4,5]imidazo[2,1-k][1,10]phenanthroline (16):** Prepared from **16a** (48.3 mg, 0.10 mmol),  $nBu_4NBF_4$  (165 mg, 0.50 mmol), and HFIP (2.50 mL) according to **GP4**. Purification by flash column chromatography on silica gel using petroleum ether and ethyl acetate to afford **16** as a green solid (20.1 mg, 42% yield).

$R_f = 0.30$  (EA).  $^1H$  NMR (400 MHz,  $DMSO-d_6$ )  $\delta$  8.19 (s, 2H), 8.09 (d,  $J = 9.4$  Hz, 2H), 7.97 (d,  $J = 9.4$  Hz, 2H), 7.27 (s, 2H), 5.39 (s, 2H), 3.74 (s, 6H), 3.06 (s, 6H).  $^{13}C$  NMR (100 MHz,  $CDCl_3$ )  $\delta$  148.5, 147.1, 145.7, 137.4, 127.5, 127.1, 125.6, 124.5, 121.8, 118.5, 100.2, 95.0, 55.9, 55.6. HRMS (ESI-TOF) for  $C_{28}H_{23}N_4O_4^+$   $[M+H]^+$ : calculated 479.1714, found 479.1710.

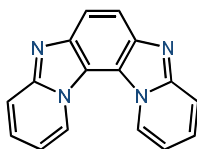

**17**  
 $C_{16}H_{10}N_4$   
 $M = 258.28$  g/mol

**Pyrido[2''',1'''':2'',3'']imidazo[4'',5'':3',4']benzo[1',2':4,5]imidazo[1,2-*a*]pyridine (17):** Prepared from **17a** (26.2 mg, 0.10 mmol),  $nBu_4NBF_4$  (165 mg, 0.50 mmol), and HFIP (2.50 mL) according to **GP4**. Purification by flash column chromatography on silica gel using petroleum ether and ethyl acetate to afford **17** as a green solid (19.0 mg, 74% yield).

$R_f = 0.40$  (EA).  $^1H$  NMR (400 MHz,  $CDCl_3$ )  $\delta$  9.02 (d,  $J = 7.0$  Hz, 2H), 8.11–8.05 (m, 2H), 7.84 (d,  $J = 9.2$  Hz, 2H), 7.49–7.39 (m, 2H), 7.09–6.97 (m, 2H).  $^{13}C$  NMR (100 MHz,  $CDCl_3$ )  $\delta$  147.0, 141.6, 127.3, 126.8, 119.2, 119.1, 111.5. HRMS (ESI-TOF) for  $C_{16}H_{11}N_4^+$   $[M+H]^+$ : calculated 259.0978, found 259.0978.

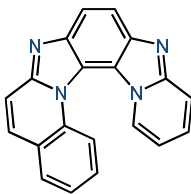

**18**  
 $C_{20}H_{12}N_4$   
M = 308.34 g/mol

**Pyrido[2''',1'''':2'',3'']imidazo[4'',5'':3',4']benzo[1',2':4,5]imidazo[1,2-*a*]quinoline (18):**

Prepared from **18a** (26.2 mg, 0.10 mmol),  $nBu_4NBF_4$  (165 mg, 0.50 mmol), and HFIP (2.50 mL) according to **GP4**. Purification by flash column chromatography on silica gel using petroleum ether and ethyl acetate to afford **18** as a brown solid (21.2 mg, 69% yield).

$R_f$  = 0.30 (EA).  $^1H$  NMR (400 MHz,  $CDCl_3$ )  $\delta$  8.31 (d,  $J$  = 7.2 Hz, 1H), 8.13–8.06 (m, 2H), 7.88–7.75 (m, 3H), 7.68–7.59 (m, 2H), 7.58–7.52 (m, 1H), 7.52–7.46 (m, 1H), 7.43–7.37 (m, 1H), 6.77–6.72 (m, 1H).  $^{13}C$  NMR (100 MHz,  $CDCl_3$ )  $\delta$  147.5, 147.1, 143.0, 141.4, 135.1, 131.7, 129.6, 128.7, 127.7, 127.2, 124.9, 124.6, 119.5, 119.1, 118.3, 118.2, 118.0, 116.4, 116.1, 109.5. HRMS (ESI-TOF) for  $C_{20}H_{13}N_4^+$   $[M+H]^+$ : calculated 309.1135, found 309.1131.

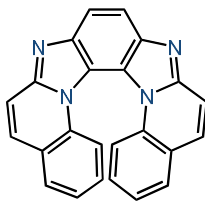**19**C<sub>24</sub>H<sub>14</sub>N<sub>4</sub>

M = 358.40 g/mol

**Quinolino[2''',1''':2'',3'']imidazo[4'',5'':3',4']benzo[1',2':4,5]imidazo[1,2-*a*]quinoline (19):** Prepared from **19a** (36.2 mg, 0.10 mmol), *n*Bu<sub>4</sub>NBF<sub>4</sub> (165 mg, 0.50 mmol), and HFIP (2.50 mL) according to **GP4**. Purification by flash column chromatography on silica gel using petroleum ether and ethyl acetate to afford **19** as a brown solid (25.1 mg, 71% yield).

**R<sub>f</sub>** = 0.20 (EA). **<sup>1</sup>H NMR** (400 MHz, CDCl<sub>3</sub>) δ 8.15 (s, 2H), 7.74–7.66 (m, 6H), 7.37 (d, *J* = 8.4 Hz, 2H), 7.19–7.12 (m, 2H), 6.72–6.64 (m, 2H). **<sup>13</sup>C NMR** (100 MHz, CDCl<sub>3</sub>) δ 147.6, 143.0, 136.3, 130.4, 128.1, 126.8, 124.6, 123.4, 119.3, 118.5, 117.8, 117.5. **HRMS** (ESI-TOF) for C<sub>24</sub>H<sub>15</sub>N<sub>4</sub><sup>+</sup> [M+H]<sup>+</sup>: calculated 359.1291, found 359.1292.

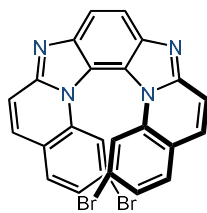**20**C<sub>24</sub>H<sub>12</sub>Br<sub>2</sub>N<sub>4</sub>

M = 516.20 g/mol

**2,15-Dibromoquinolino[2''',1''':2'',3'']imidazo[4'',5'':3',4']benzo[1',2':4,5]imidazo[1,2-a]quinoline (20):** Prepared from **20a** (52.0 mg, 0.10 mmol), *n*Bu<sub>4</sub>NBF<sub>4</sub> (165 mg, 0.50 mmol), and HFIP (2.50 mL) according to **GP4**. Purification by flash column chromatography on silica gel using ethyl acetate and methanol to afford **20** as a green solid (26.5 mg, 55% yield).

**R<sub>f</sub>** = 0.20 (EA). **<sup>1</sup>H NMR** (400 MHz, DMSO-*d*<sub>6</sub>) δ 8.13 (s, 2H), 8.06 (d, *J* = 9.4 Hz, 2H), 7.97 (d, *J* = 8.4 Hz, 2H), 7.86 (d, *J* = 9.4 Hz, 2H), 7.55 (d, *J* = 8.4 Hz, 2H), 7.48 (s, 2H). **<sup>13</sup>C NMR** (100 MHz, CDCl<sub>3</sub>). δ 147.1, 143.0, 136.1, 129.6, 129.4, 127.8, 122.5, 122.3, 121.1, 118.8, 118.0, 116.8. **HRMS** (ESI-TOF) for C<sub>24</sub>H<sub>13</sub>Br<sub>2</sub>N<sub>4</sub><sup>+</sup> [M+H]<sup>+</sup>: calculated 514.9501, found 514.9500.

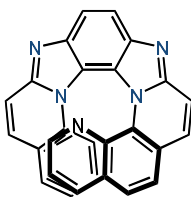

**21**  
 $C_{27}H_{15}N_5$   
 $M = 409.45 \text{ g/mol}$

**Quinolino[2''',1''':2'',3'']imidazo[4'',5'':3',4']benzo[1',2':4,5]imidazo[1,2-a][1,10]phenanthroline (21):** Prepared from **21a** (36.2 mg, 0.10 mmol),  $nBu_4NBF_4$  (165 mg, 0.50 mmol), and HFIP (2.50 mL) according to **GP4**. Purification by flash column chromatography on silica gel using ethyl acetate and methanol to afford **21** as a brown solid (26.5 mg, 65% yield).

$R_f = 0.20$  (EA).  $^1H$  NMR (400 MHz,  $CDCl_3$ )  $\delta$  8.36–8.24 (m, 2H), 8.09 (d,  $J = 9.2$  Hz, 1H), 7.96 (dd,  $J = 8.4, 2.8$  Hz, 2H), 7.82–7.64 (m, 4H), 7.51 (d,  $J = 9.2$  Hz, 1H), 7.39 (dd,  $J = 7.6, 1.4$  Hz, 1H), 6.95–6.80 (m, 3H), 6.33 (m, 1H).  $^{13}C$  NMR (100 MHz,  $CDCl_3$ )  $\delta$  146.9, 141.5, 134.4, 134.3, 129.0, 128.5, 127.1, 126.5, 125.7, 125.2, 124.3, 123.5, 123.3, 122.8, 121.6, 120.4, 119.1, 118.9, 118.0, 117.7, 117.6. **HRMS** (ESI-TOF) for  $C_{27}H_{16}N_5^+$   $[M+H]^+$ : calculated 410.1400, found 410.1397.

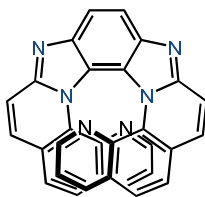

**22**  
 $C_{30}H_{16}N_6$   
M = 460.50 g/mol

**Phenanthoro[2''',1''':2'',3'']imidazo[4'',5'':3',4']benzo[1',2':4,5]imidazo[1,2-*a*]phenanthoroline (22):** Prepared from **22a** (36.2 mg, 0.10 mmol),  $nBu_4NBF_4$  (165 mg, 0.50 mmol), and HFIP (2.50 mL) according to **GP4**. Purification by flash column chromatography on silica gel using ethyl acetate and methanol to afford **22** as a brown solid (31.1 mg, 68% yield).

$R_f$  = 0.20 (EA).  $^1H$  NMR (400 MHz,  $CDCl_3$ )  $\delta$  8.38 (s, 2H), 7.97 (d,  $J$  = 9.2 Hz, 2H), 7.62 (dd,  $J$  = 8.2, 1.8 Hz, 2H), 7.58 (d,  $J$  = 9.2 Hz, 2H), 7.45 (dd,  $J$  = 4.2, 1.8 Hz, 2H), 7.40 (d,  $J$  = 8.4 Hz, 2H), 7.26 (d,  $J$  = 8.4 Hz, 2H), 6.77 (dd,  $J$  = 8.2, 4.2 Hz, 2H).  $^{13}C$  NMR (100 MHz,  $CDCl_3$ )  $\delta$  146.2, 142.1, 140.2, 134.2, 133.1, 127.7, 125.7, 125.4, 123.3, 123.1, 121.8, 119.2, 118.2. HRMS (ESI-TOF) for  $C_{30}H_{17}N_6^+$   $[M+H]^+$ : calculated 461.1509, found 461.1539.

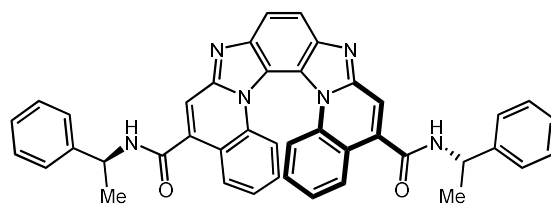

**23**  
 $C_{42}H_{32}N_6O_2$   
M = 652.76 g/mol

**5,12-Di(N-((S)-1-phenylethyl)quinolino[2''',1''':2'',3'']imidazo[4'',5'':3',4']benzo[1',2':4,5]imidazo[1,2-a]quinoline (23):** Prepared from **23a** (65.6 mg, 0.10 mmol),  $nBu_4NBF_4$  (165 mg, 0.50 mmol), and HFIP (2.50 mL) according to **GP4**. Purification by flash column chromatography on silica gel using petroleum ether and ethyl acetate to afford **23** as a brown solid (50.6 mg, 78% yield, dr = 1:1).

$R_f$  = 0.40 (EA).  $^1H$  NMR (400 MHz,  $CDCl_3$ )  $\delta$  7.94 (d,  $J$  = 8.2 Hz, 2H), 7.83 (d,  $J$  = 8.2 Hz, 2H), 7.77–7.64 (m, 8H), 7.60–7.50 (m, 12H), 7.44–7.31 (m, 12H), 6.94 (t,  $J$  = 7.6 Hz, 2H), 6.88 (t,  $J$  = 7.6 Hz, 2H), 6.74 (d,  $J$  = 8.2 Hz, 2H), 6.69 (d,  $J$  = 8.2 Hz, 2H), 6.23 (t,  $J$  = 7.6 Hz, 2H), 6.16 (t,  $J$  = 7.6 Hz, 2H), 5.54–5.44 (m, 4H), 1.82–1.74 (m, 12H).  $^{13}C$  NMR (100 MHz,  $CDCl_3$ )  $\delta$  166.15, 166.09, 145.35, 142.87, 142.85, 142.82, 136.68, 136.66, 135.13, 135.04, 128.95, 128.91, 127.75, 126.84, 126.69, 126.43, 126.34, 126.31, 126.21, 124.98, 124.91, 120.01, 119.97, 118.74, 118.67, 118.33, 118.30, 116.75, 115.72, 115.65, 49.74, 49.67, 22.03, 21.95.

**HRMS** (ESI-TOF) for  $C_{42}H_{33}N_6O_2^+$   $[M+H]^+$ : calculated 653.2660, found 653.2658.

## 5 Mechanistic Studies

### 5.1 Cyclic Voltammetry (CV) Experiments

Cyclic voltammograms were measured using a CHI 760E bipotentiostat equipped with electrochemical analysis software. A reaction was set up using general procedure with three electrodes: a steady-state glassy carbon electrode as working electrode, an Ag/AgCl (3.0 M KCl aq.) as reference electrode, and a platinum wire counter as electrode. The electrodes were polished with 0.05  $\mu\text{m}$  aluminum oxide, ultrasonically rinsed with ethanol and ultrapure water before measurements. The solvent was deoxygenated by nitrogen bubbling for 0.5 h. The CV plotting convention was IUPAC. The starting point was 0.0 V.

### 5.2 Cyclic voltammetry (CV) experiments of substrate **5a**

Cyclic voltammetry (CV) of the electron-rich substituted helicene **5a** and blank were performed in acetonitrile containing  $n\text{Bu}_4\text{NPF}_6$  (0.100 M, 10.0 mL) as the supporting electrolyte. A glassy carbon working electrode, a Pt wire counter electrode, and an Ag/AgCl (3.0 M KCl aq.) reference electrode were employed. The potential was scanned from 0.0 to 3.0 V at a sweep rate of 50  $\text{mV s}^{-1}$ .

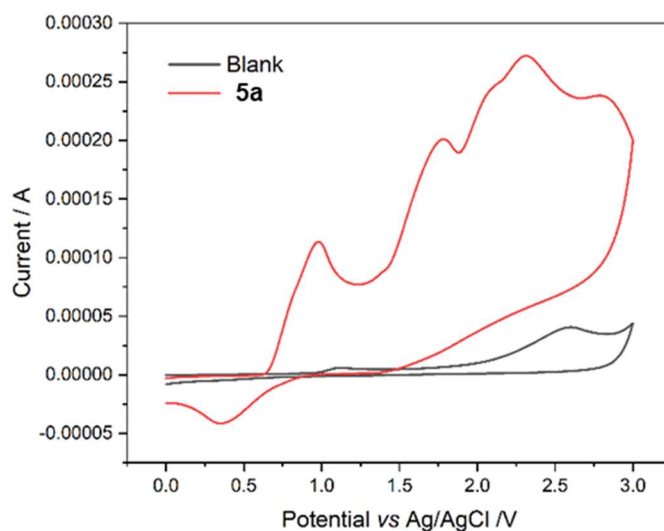

Figure S1. CV curves of blank and **5a**

### 5.3 Cyclic Voltammetry (CV) Experiments of Substrate **11a**

Cyclic voltammetry (CV) of the electron-deficient substituted helicene **11a** and blank were performed in acetonitrile containing  $n\text{Bu}_4\text{NPF}_6$  (0.100 M, 100 mL) as the supporting electrolyte. A glassy carbon working electrode, a Pt wire counter electrode, and an Ag/AgCl (3.0 M KCl aq.) reference electrode were employed. The potential was scanned from 0.0 to 3.0 V at a sweep rate of  $50 \text{ mV s}^{-1}$ .

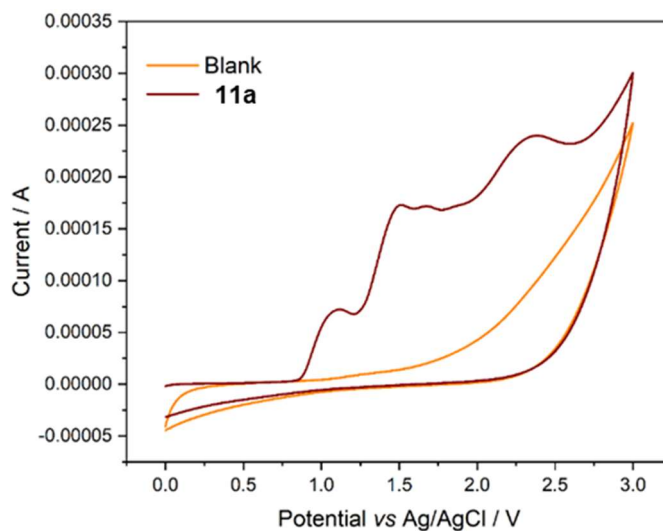

**Figure S2.** CV curves of blank and **11a**

The oxidation potential of **5a** (electron-rich) is lower than that of **11a** (electron-deficient), consistent with the substituent electronic effects. Multiple oxidation peaks were observed for **5a**, indicating a multistep electron-transfer process during oxidation.

#### 5.4 Radical Probe Experiments.

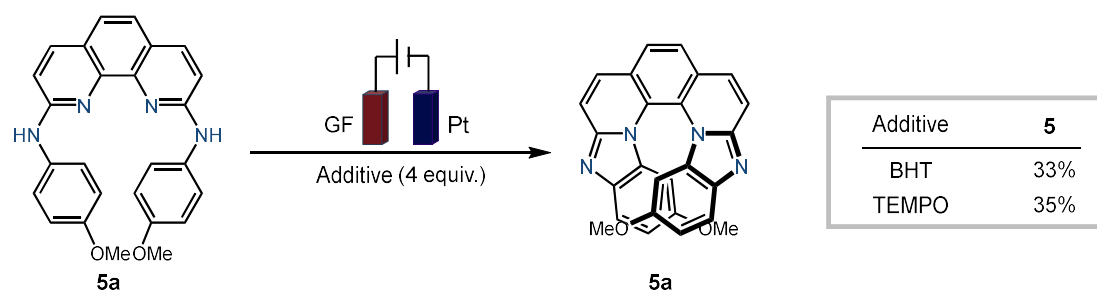

**Figure S3.** Radical probe experiments

A platinum plate ( $10 \times 15 \times 1 \text{ mm}^3$ ) and graphite felt ( $10 \times 15 \times 3 \text{ mm}^3$ ) were used as cathode and anode, respectively. To a 15.0 mL Schlenk tube equipped with a magnetic stir bar were added substrate **5a** (0.10 mmol, 1.00 equiv.),  $n\text{Bu}_4\text{NPF}_6$  (0.50 mmol, 5.00 equiv.) and the radical inhibition reagent (0.40 mmol, 4.00 equiv.) in HFIP (2.50 mL).

The mixture was stirred and electrolyzed with a constant current of 5.0 mA at room temperature. After the reaction was completed as monitored with TLC, the electrodes were washed with DCM (10.0 mL) and EtOH (10.0 mL), and the washings were combined with the reaction solution. 1,3,5-trimethoxybenzene (0.20 mmol, 2.00 equiv.) was then added as an internal standard for yield determination by  $^1\text{H}$  NMR. The solvent was removed under reduced pressure, and the residue was dissolved in  $\text{DMSO-}d_6$  (0.50 mL) for  $^1\text{H}$  NMR analysis.

Radical inhibition experiments were conducted by adding 4.00 equiv of BHT or TEMPO under the standard conditions. The yields decreased to 33% and 35%, respectively (vs. control), indicating the involvement of a radical pathway.

## 5.5 Proposed Mechanism

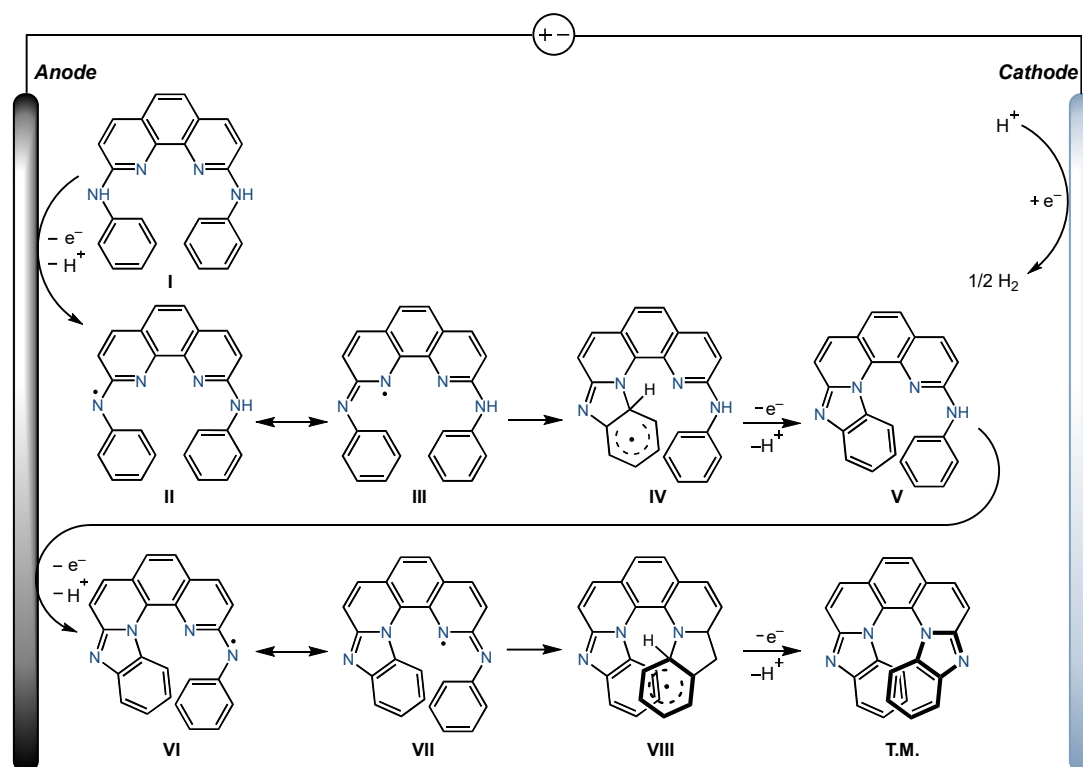

Figure S4. Proposed mechanism

As shown in Figure S4, substrate **I** undergoes anodic single-electron oxidation and deprotonation to afford radical intermediate **II**, which resonates to **III** and adds to the aromatic ring to give **IV**. A second anodic oxidation and deprotonation furnish the mono-C-N coupled product **V**. Further anodic oxidation of **V** generates radical intermediates **VI/VII**, which undergo radical addition to form **VIII**. Subsequent oxidation/deprotonation affords the bis-C-N coupled product **T.M.**. In parallel, proton reduction at the cathode releases  $H_2$ . The proposed mechanism is consistent with the multistep oxidation observed in the CV experiments.

## 6 Single Crystal Structures of Helicenes 11 and 20

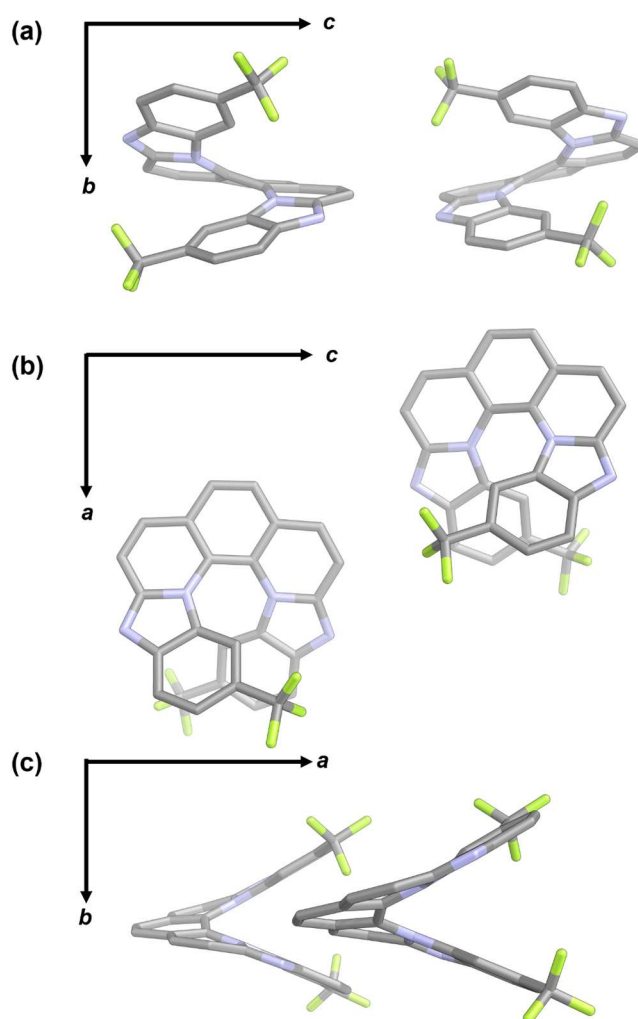

**Figure S5.** Single crystal structures of racemic helicene *rac-11*. Single crystals of *rac-11* suitable for X-ray diffraction were obtained by slow volatilization of a DMSO solution at room temperature over one week. (a–c) Helicene **11** in crystal view along (a) *a*-axis, (b) *b*-axis, and (c) *c*-axis.

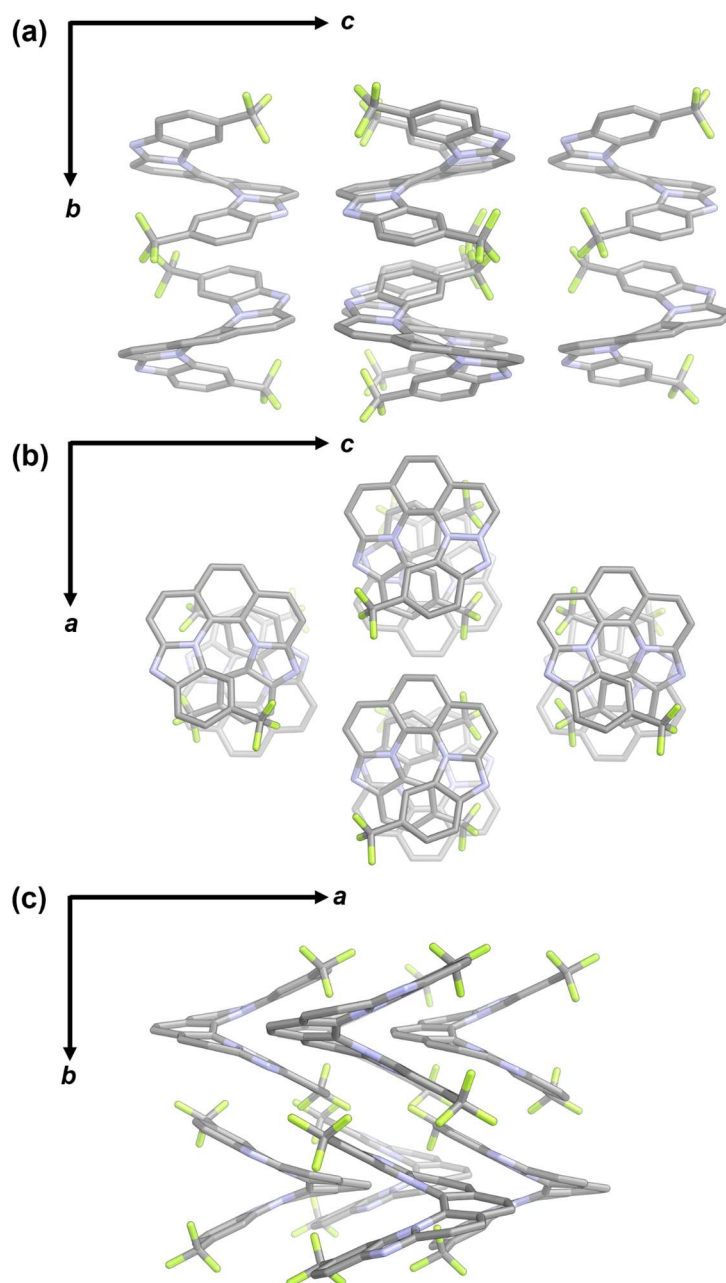

**Figure S6.** Packing diagram of crystal racemic helicene *rac-11*. (a–c) *rac-11* in crystal view along (a) *a*-axis, (b) *b*-axis, and (c) *c*-axis.

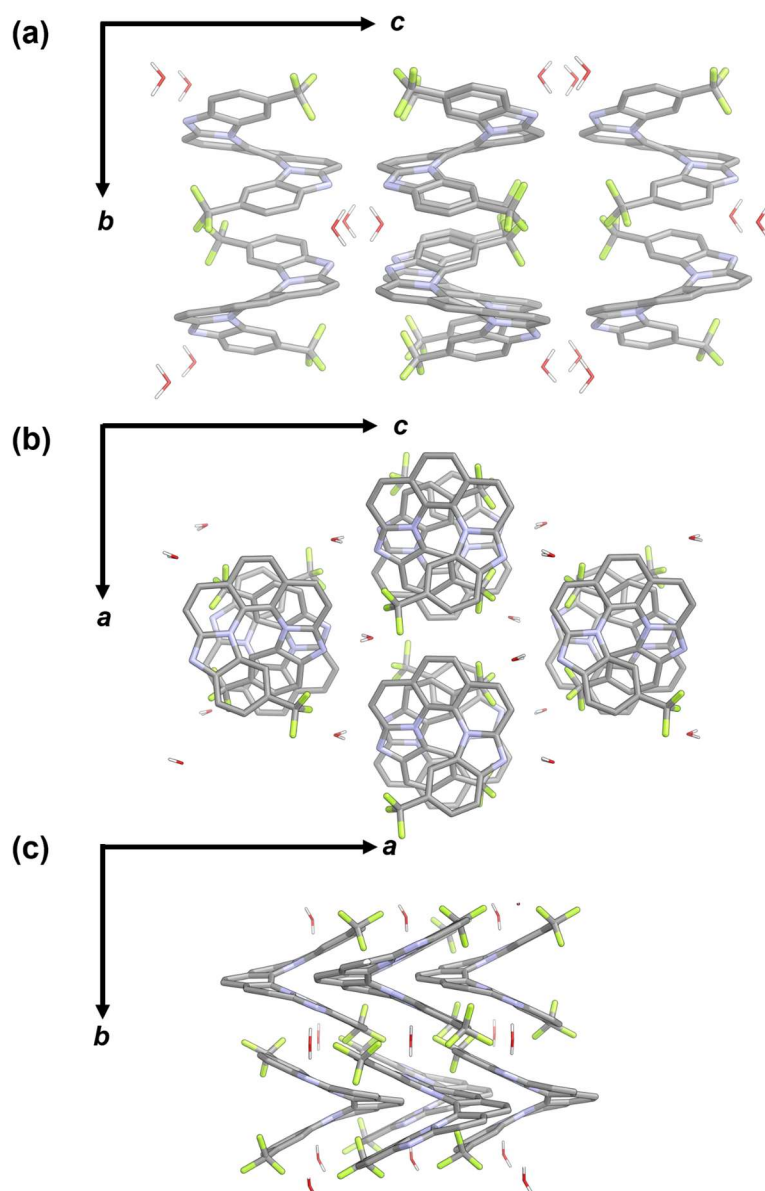

**Figure S7.** Packing diagram of crystal racemic helicene  $rac-11 \cdot H_2O$ . (a–c)  $rac-11 \cdot H_2O$  in crystal view along (a)  $a$ -axis, (b)  $b$ -axis, and (c)  $c$ -axis.

**Table S8. Crystal data and structure refinement for *rac*-11·H<sub>2</sub>O**

|                                             |                                                                 |
|---------------------------------------------|-----------------------------------------------------------------|
| Identification code                         | <i>rac</i> -11·H <sub>2</sub> O                                 |
| Empirical formula                           | C <sub>26</sub> H <sub>14</sub> F <sub>6</sub> N <sub>4</sub> O |
| Formula weight                              | 512.41                                                          |
| Temperature/K                               | 330                                                             |
| Crystal system                              | orthorhombic                                                    |
| Space group                                 | Pnna                                                            |
| a/Å                                         | 9.9295(15)                                                      |
| b/Å                                         | 12.7666(17)                                                     |
| c/Å                                         | 17.765(3)                                                       |
| α/°                                         | 90                                                              |
| β/°                                         | 90                                                              |
| γ/°                                         | 90                                                              |
| Volume/Å <sup>3</sup>                       | 2252.0(6)                                                       |
| Z                                           | 4                                                               |
| ρ <sub>calc</sub> /cm <sup>3</sup>          | 1.511                                                           |
| μ/mm <sup>-1</sup>                          | 0.129                                                           |
| F(000)                                      | 1040                                                            |
| Crystal size/mm <sup>3</sup>                | 0.34 × 0.21 × 0.156                                             |
| Radiation                                   | MoKα (λ = 0.71073)                                              |
| 2θ range for data collection/°              | 3.928 to 49.992                                                 |
| Index ranges                                | -11 ≤ h ≤ 11, -15 ≤ k ≤ 13, -21 ≤ l ≤ 21                        |
| Reflections collected                       | 29702                                                           |
| Independent reflections                     | 1978 [R <sub>int</sub> = 0.0634, R <sub>sigma</sub> = 0.0238]   |
| Data/restraints/parameters                  | 1978/0/202                                                      |
| Goodness-of-fit on F <sup>2</sup>           | 1.054                                                           |
| Final R indexes [I ≥ 2σ (I)]                | R <sub>1</sub> = 0.0488, wR <sub>2</sub> = 0.1218               |
| Final R indexes [all data]                  | R <sub>1</sub> = 0.0694, wR <sub>2</sub> = 0.1420               |
| Largest diff. peak/hole / e Å <sup>-3</sup> | 0.16/-0.21                                                      |
| CCDC number                                 | 2522083                                                         |

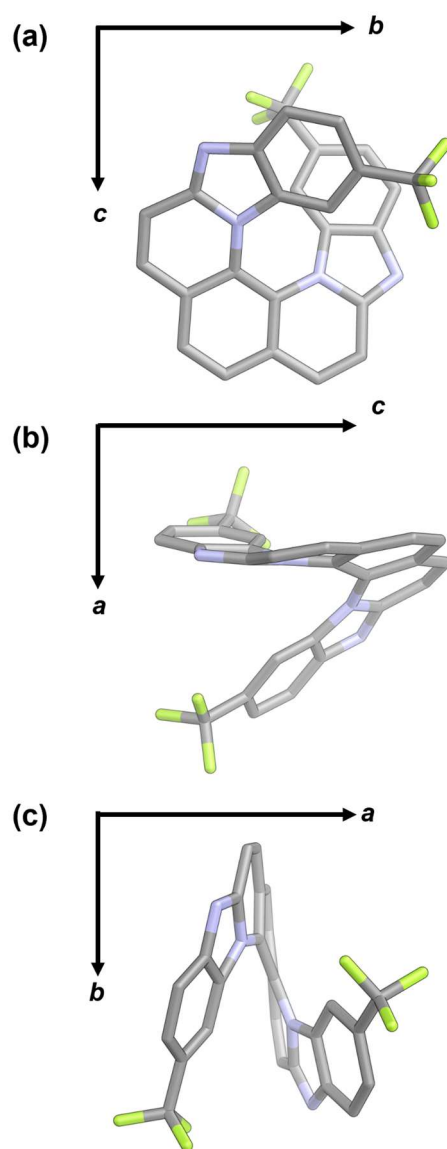

**Figure S8.** Single crystal structures of helicene *M-11*. Single crystals of *M-11* suitable for X-ray diffraction were obtained by slow vapor diffusion of diisopropyl ether into 1,2-dichloroethane solutions over 1 week at room temperature. (a–c) Helicene *M-11* in crystal view along (a) *a*-axis, (b) *b*-axis, and (c) *c*-axis.

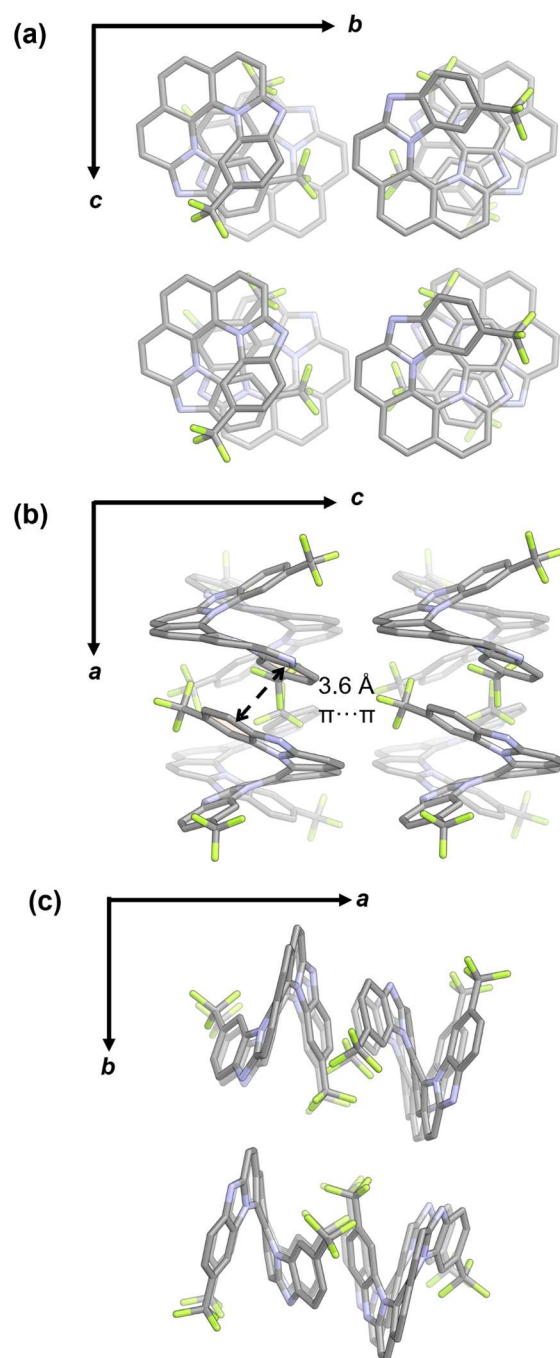

**Figure S9.** Packing diagram of crystal helicene *M-11*. (a–c) *M-11* in crystal view along (a) *a*-axis, (b) *b*-axis, and (c) *c*-axis.

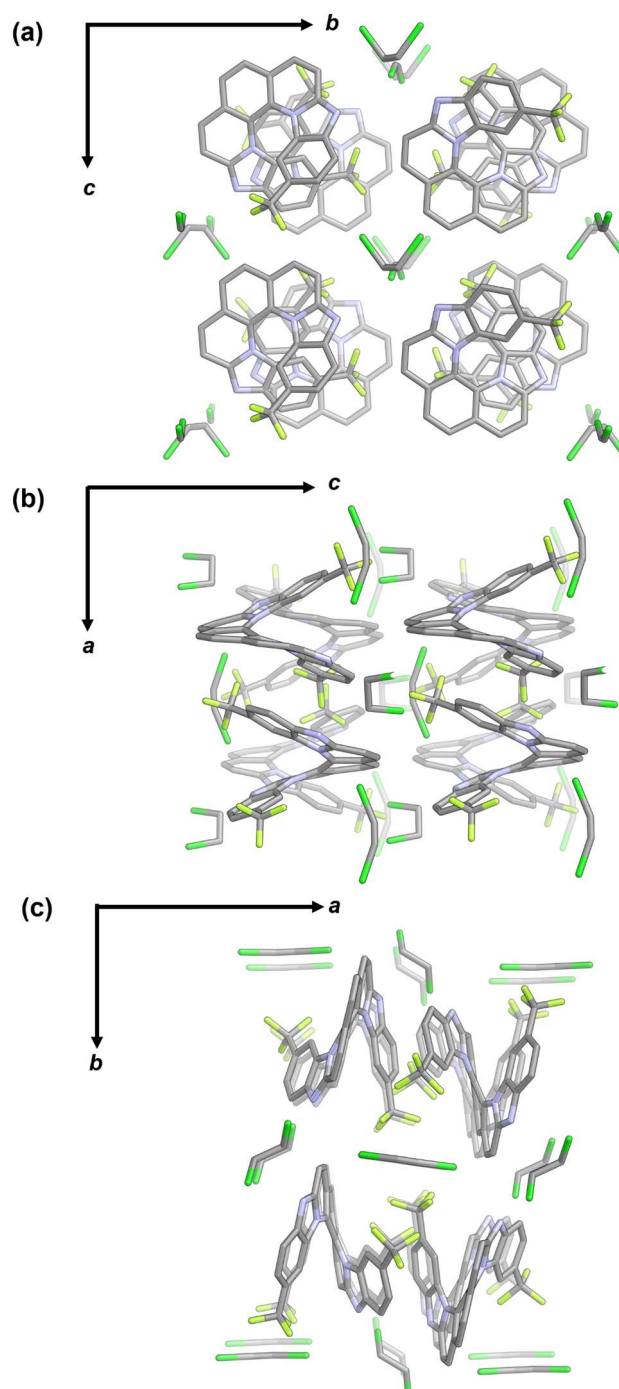

**Figure S10.** Packing diagram of crystal helicene *M-11* with 1,2-dichloroethane. (a–c) *M-11* with 1,2-dichloroethane in crystal view along (a) *a*-axis, (b) *b*-axis, and (c) *c*-axis.

**Table S9. Crystal data and structure refinement for *M-11* with 1,2-dichloroethane**

| Identification code                         | <i>M-11</i> with 1,2-dichloroethane                                           |
|---------------------------------------------|-------------------------------------------------------------------------------|
| Empirical formula                           | C <sub>28</sub> H <sub>16</sub> Cl <sub>2</sub> F <sub>6</sub> N <sub>4</sub> |
| Formula weight                              | 593.35                                                                        |
| Temperature/K                               | 200                                                                           |
| Crystal system                              | orthorhombic                                                                  |
| Space group                                 | P2 <sub>1</sub> 2 <sub>1</sub> 2                                              |
| <i>a</i> /Å                                 | 12.9156(9)                                                                    |
| <i>b</i> /Å                                 | 20.0304(13)                                                                   |
| <i>c</i> /Å                                 | 9.9686(6)                                                                     |
| $\alpha$ /°                                 | 90                                                                            |
| $\beta$ /°                                  | 90                                                                            |
| $\gamma$ /°                                 | 90                                                                            |
| Volume/Å <sup>3</sup>                       | 2578.9(3)                                                                     |
| <i>Z</i>                                    | 4                                                                             |
| $\rho_{\text{calc}}$ /cm <sup>3</sup>       | 1.528                                                                         |
| $\mu$ /mm <sup>-1</sup>                     | 2.899                                                                         |
| F(000)                                      | 1200                                                                          |
| Crystal size/mm <sup>3</sup>                | 0.39 × 0.34 × 0.28                                                            |
| Radiation                                   | CuK $\alpha$ ( $\lambda$ = 1.54178)                                           |
| 2 $\theta$ range for data collection/°      | 8.146 to 140.394                                                              |
| Index ranges                                | -15 ≤ <i>h</i> ≤ 15, -20 ≤ <i>k</i> ≤ 24, -12 ≤ <i>l</i> ≤ 8                  |
| Reflections collected                       | 13766                                                                         |
| Independent reflections                     | 4666 [ $R_{\text{int}}$ = 0.0549, $R_{\text{sigma}}$ = 0.0491]                |
| Data/restraints/parameters                  | 4666/18/381                                                                   |
| Goodness-of-fit on F <sup>2</sup>           | 1.061                                                                         |
| Final R indexes [ $I \geq 2\sigma(I)$ ]     | $R_1$ = 0.0476, $wR_2$ = 0.1188                                               |
| Final R indexes [all data]                  | $R_1$ = 0.0494, $wR_2$ = 0.1195                                               |
| Largest diff. peak/hole / e Å <sup>-3</sup> | 0.39/-0.52                                                                    |
| Flack parameter                             | 0.132(7)                                                                      |
| CCDC number                                 | 2522084                                                                       |

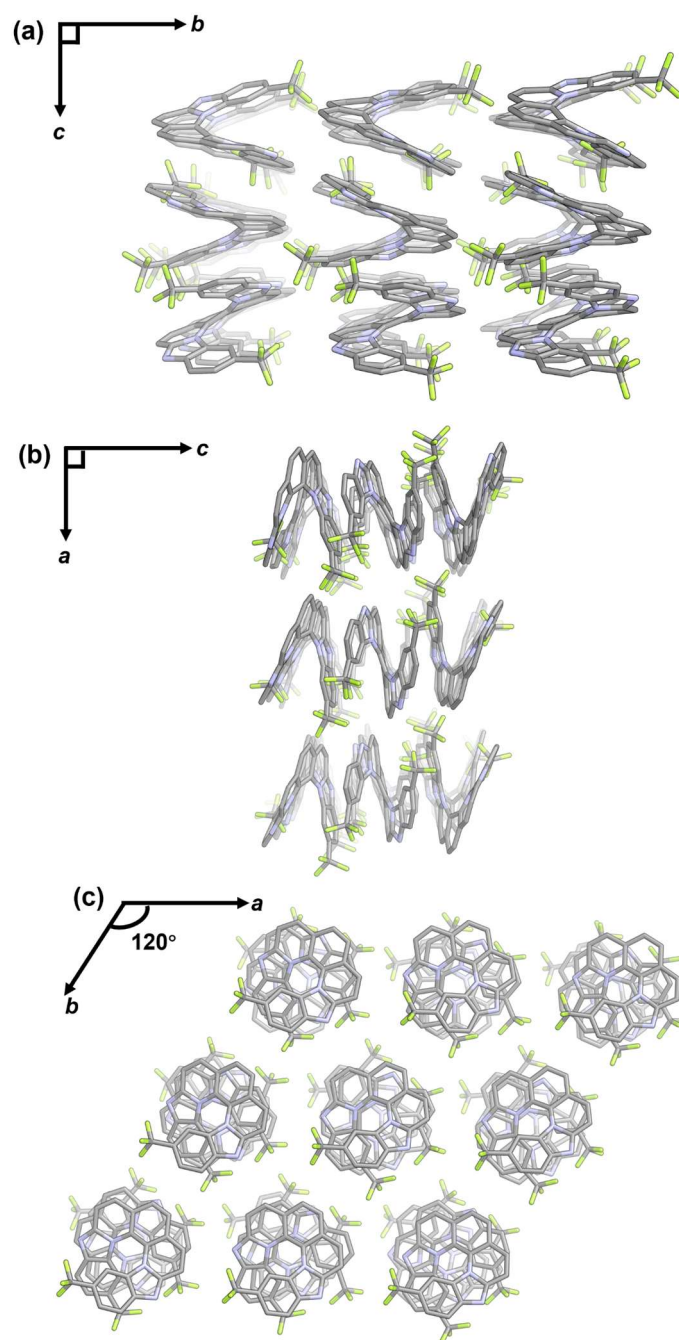

**Figure S11.** Single crystal structures of helicene *M-11*. Single crystals of *M-11* suitable for X-ray diffraction were obtained by slow vapor diffusion of diisopropyl ether into acetone solutions over 1 week at room temperature. (a–c) Helicene *M-11* in crystal view along (a) *a*-axis, (b) *b*-axis, and (c) *c*-axis.

**Table S10. Crystal data and structure refinement for *M-11* with acetone**

| Identification code                         | <i>M-11</i> with acetone                                       |
|---------------------------------------------|----------------------------------------------------------------|
| Empirical formula                           | C <sub>26</sub> H <sub>12</sub> F <sub>6</sub> N <sub>4</sub>  |
| Formula weight                              | 494.40                                                         |
| Temperature/K                               | 193.00                                                         |
| Crystal system                              | trigonal                                                       |
| Space group                                 | P3 <sub>2</sub>                                                |
| a/Å                                         | 32.2229(6)                                                     |
| b/Å                                         | 32.2229(6)                                                     |
| c/Å                                         | 15.7246(4)                                                     |
| α/°                                         | 90                                                             |
| β/°                                         | 90                                                             |
| γ/°                                         | 120                                                            |
| Volume/Å <sup>3</sup>                       | 14139.7(6)                                                     |
| Z                                           | 27                                                             |
| ρ <sub>calc</sub> /cm <sup>3</sup>          | 1.568                                                          |
| μ/mm <sup>-1</sup>                          | 1.151                                                          |
| F(000)                                      | 6750.0                                                         |
| Crystal size/mm <sup>3</sup>                | 0.13 × 0.11 × 0.09                                             |
| Radiation                                   | CuKα (λ = 1.54178)                                             |
| 2θ range for data collection/°              | 5.484 to 149.826                                               |
| Index ranges                                | -40 ≤ h ≤ 40, -40 ≤ k ≤ 40, -15 ≤ l ≤ 19                       |
| Reflections collected                       | 334729                                                         |
| Independent reflections                     | 36004 [R <sub>int</sub> = 0.1674, R <sub>sigma</sub> = 0.0695] |
| Data/restraints/parameters                  | 36004/6229/2918                                                |
| Goodness-of-fit on F <sup>2</sup>           | 1.080                                                          |
| Final R indexes [I ≥ 2σ (I)]                | R <sub>1</sub> = 0.1394, wR <sub>2</sub> = 0.3314              |
| Final R indexes [all data]                  | R <sub>1</sub> = 0.1692, wR <sub>2</sub> = 0.3522              |
| Largest diff. peak/hole / e Å <sup>-3</sup> | 0.94/-0.73                                                     |
| Flack parameter                             | 0.09(6)                                                        |
| CCDC number                                 | 2522089                                                        |

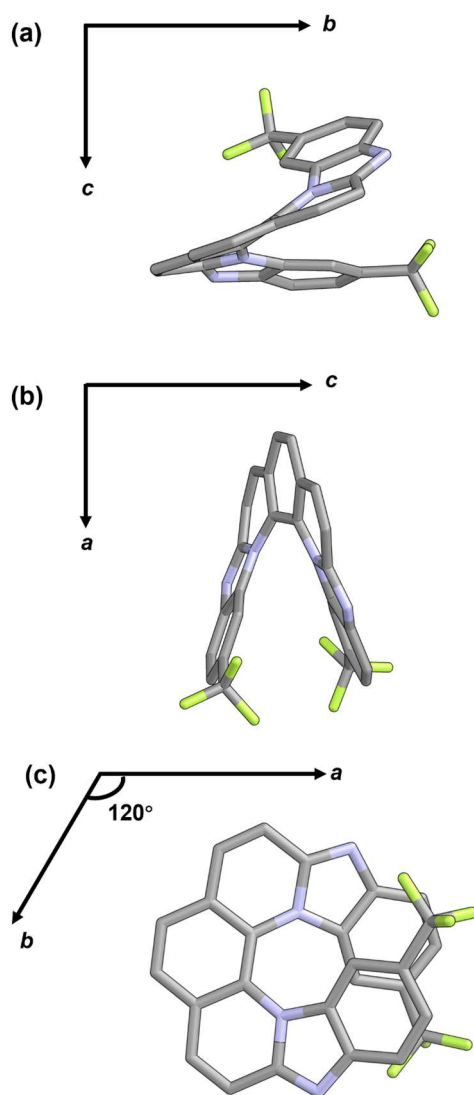

**Figure S12.** Single crystal structures of helicene *P-11*. Single crystals of *P-11* suitable for X-ray diffraction were obtained by slow vapor diffusion of diisopropyl ether into acetone solutions over 1 week at room temperature. (a–c) Helicene *P-11* in crystal view along (a) *a*-axis, (b) *b*-axis, and (c) *c*-axis.

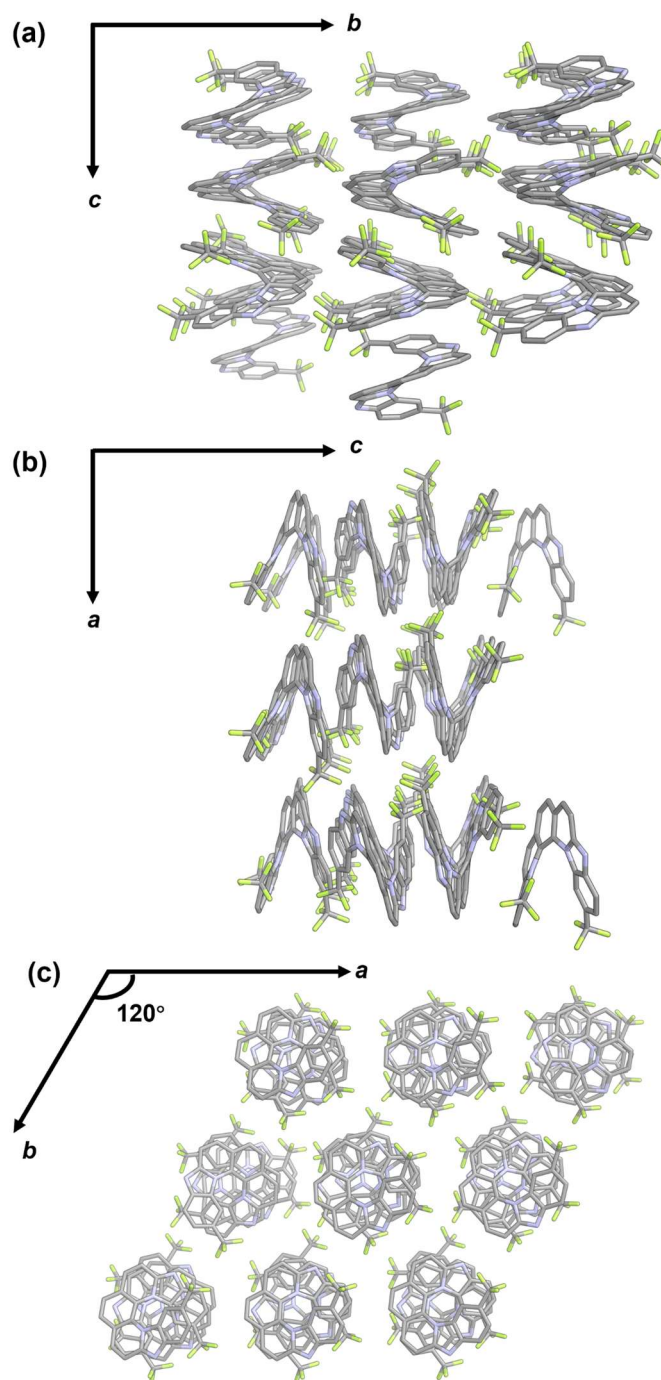

**Figure S13.** Packing diagram of crystal helicene *P-11*. (a–c) *P-11* in crystal view along (a) *a*-axis, (b) *b*-axis, and (c) *c*-axis.

**Table S11. Crystal data and structure refinement for P-11**

| Identification code                         | P-11                                                           |
|---------------------------------------------|----------------------------------------------------------------|
| Empirical formula                           | C <sub>26</sub> H <sub>12</sub> F <sub>6</sub> N <sub>4</sub>  |
| Formula weight                              | 494.40                                                         |
| Temperature/K                               | 200.00                                                         |
| Crystal system                              | trigonal                                                       |
| Space group                                 | P31                                                            |
| a/Å                                         | 32.2457(9)                                                     |
| b/Å                                         | 32.2457(9)                                                     |
| c/Å                                         | 15.7465(7)                                                     |
| α/°                                         | 90                                                             |
| β/°                                         | 90                                                             |
| γ/°                                         | 120                                                            |
| Volume/Å <sup>3</sup>                       | 14179.4(10)                                                    |
| Z                                           | 27                                                             |
| ρ <sub>calc</sub> /cm <sup>3</sup>          | 1.563                                                          |
| μ/mm <sup>-1</sup>                          | 1.147                                                          |
| F(000)                                      | 6750.0                                                         |
| Crystal size/mm <sup>3</sup>                | 0.13 × 0.11 × 0.08                                             |
| Radiation                                   | CuKα (λ = 1.54178)                                             |
| 2θ range for data collection/°              | 5.482 to 140.738                                               |
| Index ranges                                | -39 ≤ h ≤ 39, -39 ≤ k ≤ 39, -19 ≤ l ≤ 14                       |
| Reflections collected                       | 127801                                                         |
| Independent reflections                     | 33091 [R <sub>int</sub> = 0.1146, R <sub>sigma</sub> = 0.1071] |
| Data/restraints/parameters                  | 33091/6859/2917                                                |
| Goodness-of-fit on F <sup>2</sup>           | 1.127                                                          |
| Final R indexes [I ≥ 2σ (I)]                | R <sub>1</sub> = 0.1101, wR <sub>2</sub> = 0.2877              |
| Final R indexes [all data]                  | R <sub>1</sub> = 0.1519, wR <sub>2</sub> = 0.3213              |
| Largest diff. peak/hole / e Å <sup>-3</sup> | 0.45/-0.35                                                     |
| Flack parameter                             | 0.11(7)                                                        |
| CCDC number                                 | 2522088                                                        |

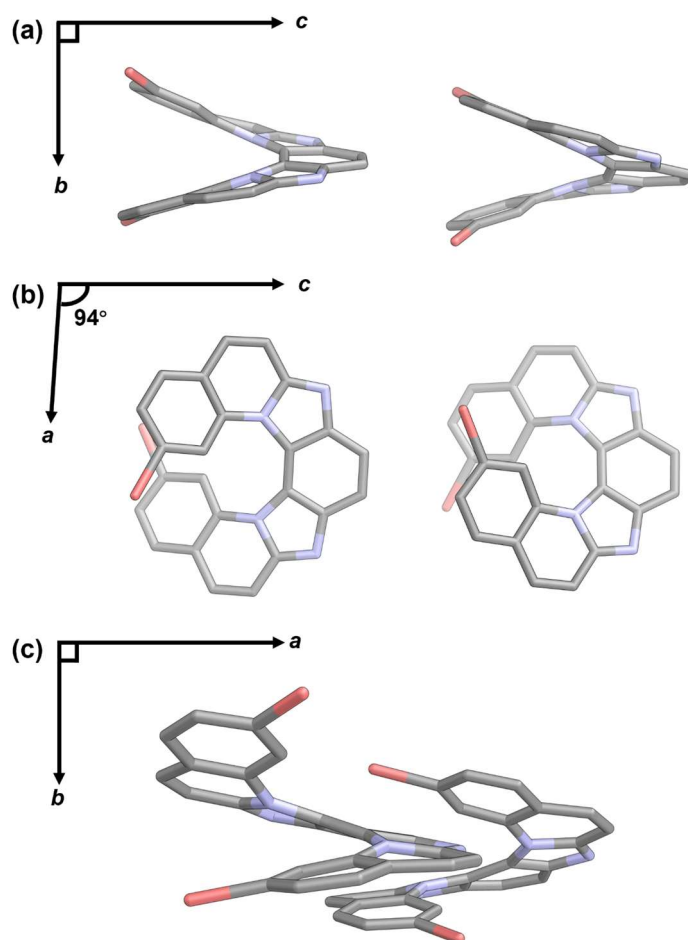

**Figure S14.** Single crystal structures of racemic helicene *rac-20*. Single crystals of *rac-20* suitable for X-ray diffraction were obtained by slow vapor diffusion of methanol into dichloromethane solutions over 1 week at room temperature. (a–c) Helicene *rac-20* in crystal view along (a) *a*-axis, (b) *b*-axis, and (c) *c*-axis.

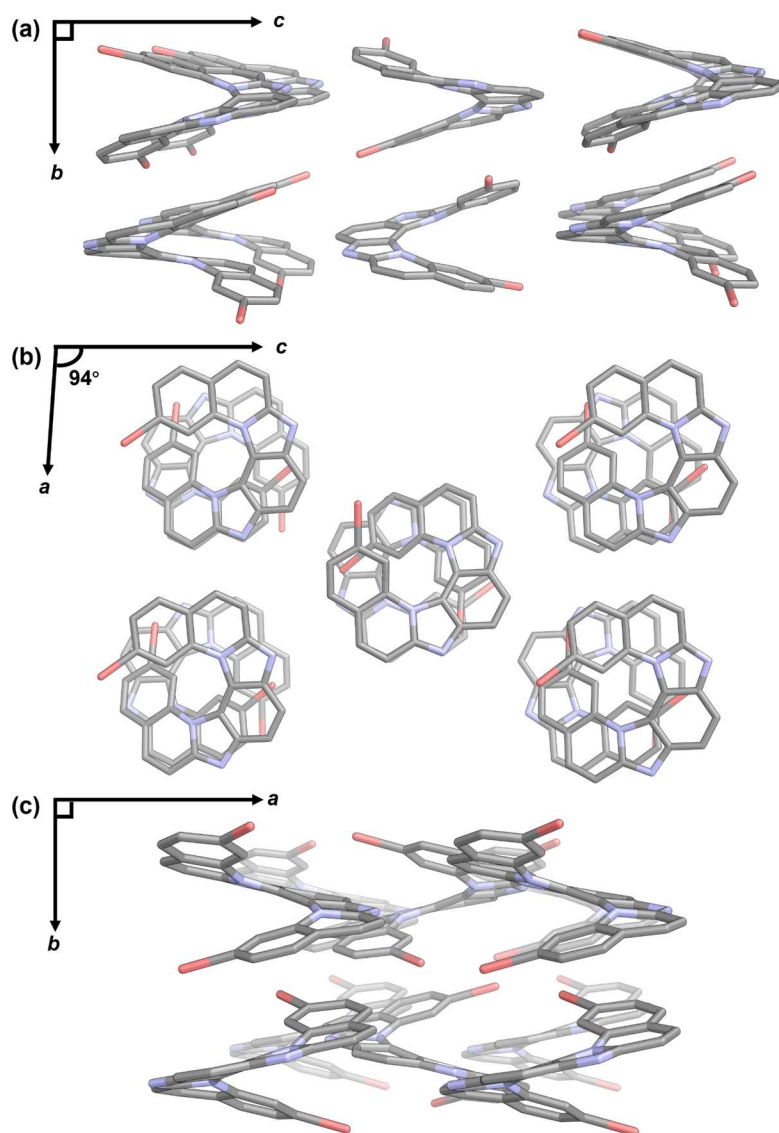

**Figure S15.** Packing diagram of crystal racemic helicene *rac-20*. (a–c) *rac-20* in crystal view along (a) *a*-axis, (b) *b*-axis, and (c) *c*-axis.

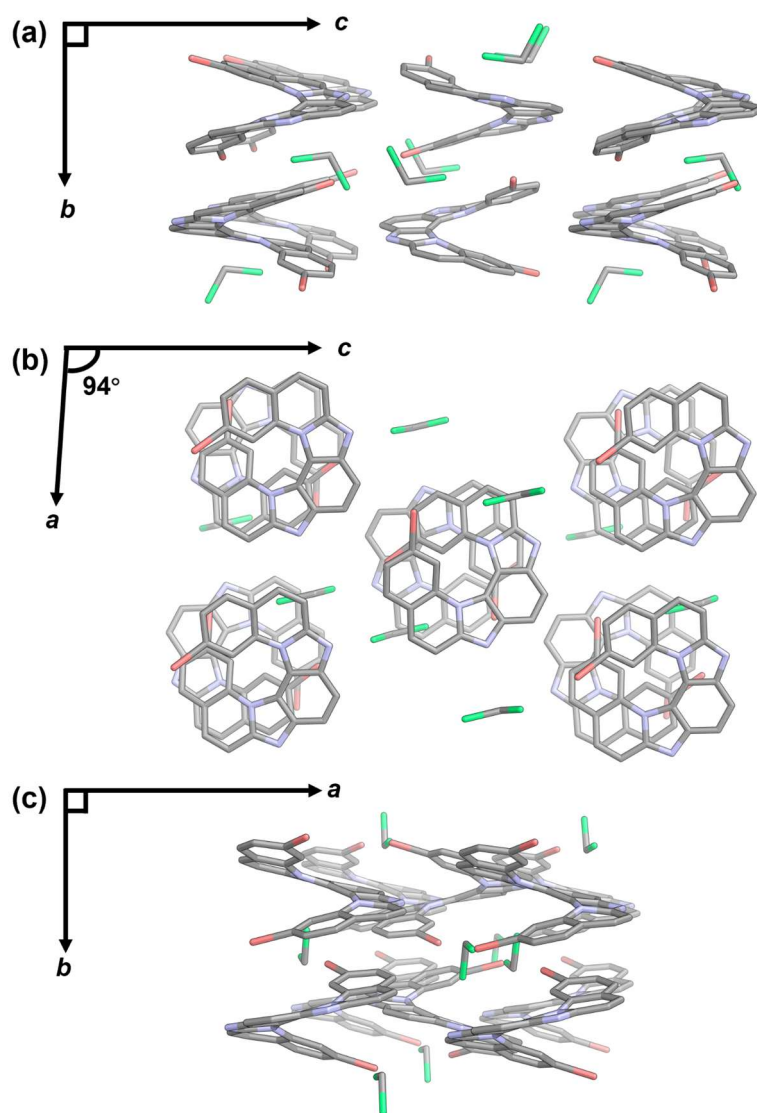

**Figure S16.** Packing diagram of crystal racemic helicene *rac*-20·CH<sub>2</sub>Cl<sub>2</sub>. (a–c) *rac*-20·CH<sub>2</sub>Cl<sub>2</sub> in crystal view along (a) *a*-axis, (b) *b*-axis, and (c) *c*-axis.

**Table S12. Crystal data and structure refinement for *rac*-20·CH<sub>2</sub>Cl<sub>2</sub>**

|                                                              |                                                                                |
|--------------------------------------------------------------|--------------------------------------------------------------------------------|
| Identification code                                          | <i>rac</i> -20·CH <sub>2</sub> Cl <sub>2</sub>                                 |
| Empirical formula                                            | C <sub>25</sub> H <sub>14</sub> Br <sub>2</sub> Cl <sub>2</sub> N <sub>4</sub> |
| Formula weight                                               | 601.12                                                                         |
| Temperature/K                                                | 251                                                                            |
| Crystal system                                               | monoclinic                                                                     |
| Space group                                                  | P2 <sub>1</sub> /n                                                             |
| <i>a</i> /Å                                                  | 10.1623(10)                                                                    |
| <i>b</i> /Å                                                  | 11.5407(9)                                                                     |
| <i>c</i> /Å                                                  | 18.8777(18)                                                                    |
| $\alpha$ /°                                                  | 90                                                                             |
| $\beta$ /°                                                   | 94.138(4)                                                                      |
| $\gamma$ /°                                                  | 90                                                                             |
| Volume/Å <sup>3</sup>                                        | 2208.2(3)                                                                      |
| <i>Z</i>                                                     | 4                                                                              |
| $\rho_{\text{calc}}/\text{cm}^3$                             | 1.808                                                                          |
| $\mu/\text{mm}^{-1}$                                         | 3.936                                                                          |
| F(000)                                                       | 1184                                                                           |
| Crystal size/mm <sup>3</sup>                                 | 0.37 × 0.18 × 0.13                                                             |
| Radiation                                                    | MoK $\alpha$ ( $\lambda$ = 0.71073)                                            |
| 2 $\theta$ range for data collection/°                       | 4.14 to 54.976                                                                 |
| Index ranges                                                 | -13 ≤ <i>h</i> ≤ 13, -14 ≤ <i>k</i> ≤ 14, -24 ≤ <i>l</i> ≤ 24                  |
| Reflections collected                                        | 50346                                                                          |
| Independent reflections                                      | 4977 [ <i>R</i> <sub>int</sub> = 0.0983, <i>R</i> <sub>sigma</sub> = 0.0532]   |
| Data/restraints/parameters                                   | 4977/0/298                                                                     |
| Goodness-of-fit on F <sup>2</sup>                            | 1.013                                                                          |
| Final <i>R</i> indexes [ <i>I</i> ≥ 2 $\sigma$ ( <i>I</i> )] | <i>R</i> <sub>1</sub> = 0.0315, <i>wR</i> <sub>2</sub> = 0.0673                |
| Final <i>R</i> indexes [all data]                            | <i>R</i> <sub>1</sub> = 0.0501, <i>wR</i> <sub>2</sub> = 0.0757                |
| Largest diff. peak/hole / e Å <sup>-3</sup>                  | 0.46/-0.52                                                                     |
| CCDC number                                                  | 2522086                                                                        |

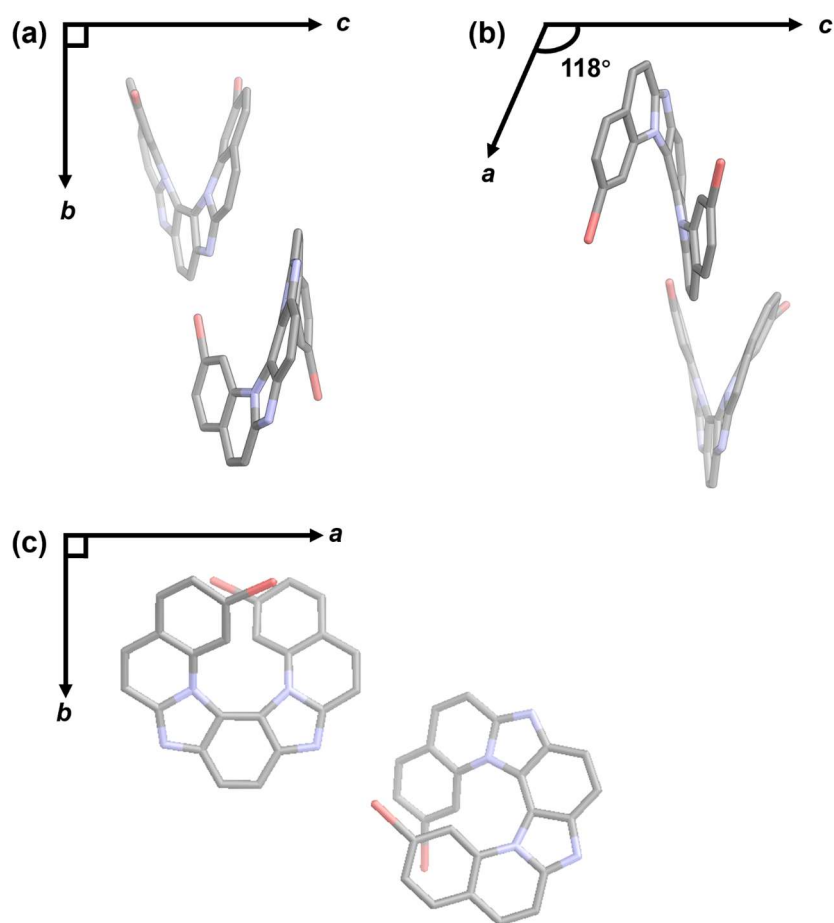

**Figure S17.** Single crystal structures of helicene *M-20*. Single crystals of *M-20* suitable for X-ray diffraction were obtained by slow vapor diffusion of methanol into dichloromethane solutions over 1 week at room temperature. (a–c) Helicene *M-20* in crystal view along (a) *a*-axis, (b) *b*-axis, and (c) *c*-axis.

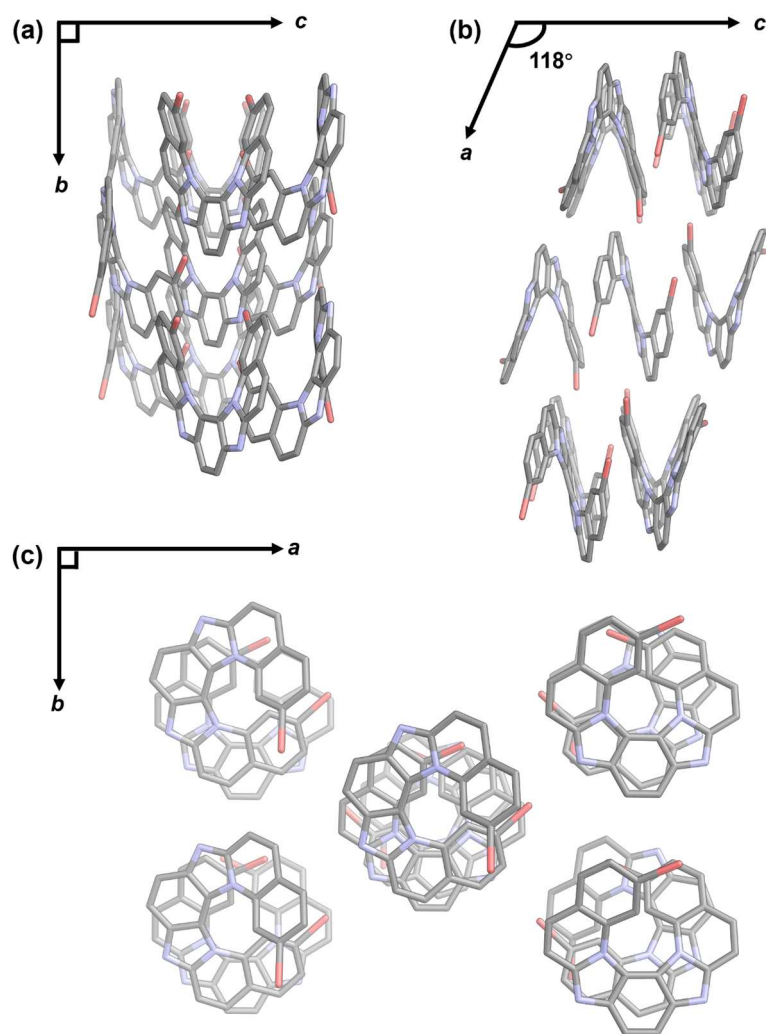

**Figure S18.** Packing diagram of crystal *M-20*. (a–c) *M-20* in crystal view along (a) *a*-axis, (b) *b*-axis, and (c) *c*-axis.

**Table S13. Crystal data and structure refinement for M-20**

| Identification code                         | M-20                                                           |
|---------------------------------------------|----------------------------------------------------------------|
| Empirical formula                           | C <sub>24</sub> H <sub>12</sub> Br <sub>2</sub> N <sub>4</sub> |
| Formula weight                              | 516.2                                                          |
| Temperature/K                               | 256                                                            |
| Crystal system                              | monoclinic                                                     |
| Space group                                 | C2                                                             |
| a/Å                                         | 20.1346(14)                                                    |
| b/Å                                         | 10.2688(7)                                                     |
| c/Å                                         | 15.6799(9)                                                     |
| $\alpha$ /°                                 | 90                                                             |
| $\beta$ /°                                  | 117.915(2)                                                     |
| $\gamma$ /°                                 | 90                                                             |
| Volume/Å <sup>3</sup>                       | 2864.7(3)                                                      |
| Z                                           | 6                                                              |
| $\rho_{\text{calc}}/\text{cm}^3$            | 1.795                                                          |
| $\mu/\text{mm}^{-1}$                        | 4.265                                                          |
| F(000)                                      | 1524                                                           |
| Crystal size/mm <sup>3</sup>                | 0.38 × 0.08 × 0.07                                             |
| Radiation                                   | MoK $\alpha$ ( $\lambda$ = 0.71073)                            |
| 2 $\theta$ range for data collection/°      | 4.124 to 54.99                                                 |
| Index ranges                                | -26 ≤ h ≤ 26, -13 ≤ k ≤ 13, -19 ≤ l ≤ 20                       |
| Reflections collected                       | 41535                                                          |
| Independent reflections                     | 6555 [ $R_{\text{int}}$ = 0.0933, $R_{\text{sigma}}$ = 0.0643] |
| Data/restraints/parameters                  | 6555/1/406                                                     |
| Goodness-of-fit on F <sup>2</sup>           | 1.03                                                           |
| Final R indexes [ $I \geq 2\sigma(I)$ ]     | $R_1$ = 0.0325, $wR_2$ = 0.0631                                |
| Final R indexes [all data]                  | $R_1$ = 0.0485, $wR_2$ = 0.0692                                |
| Largest diff. peak/hole / e Å <sup>-3</sup> | 0.54/-0.41                                                     |
| Flack parameter                             | 0.020(6)                                                       |
| CCDC number                                 | 2522087                                                        |

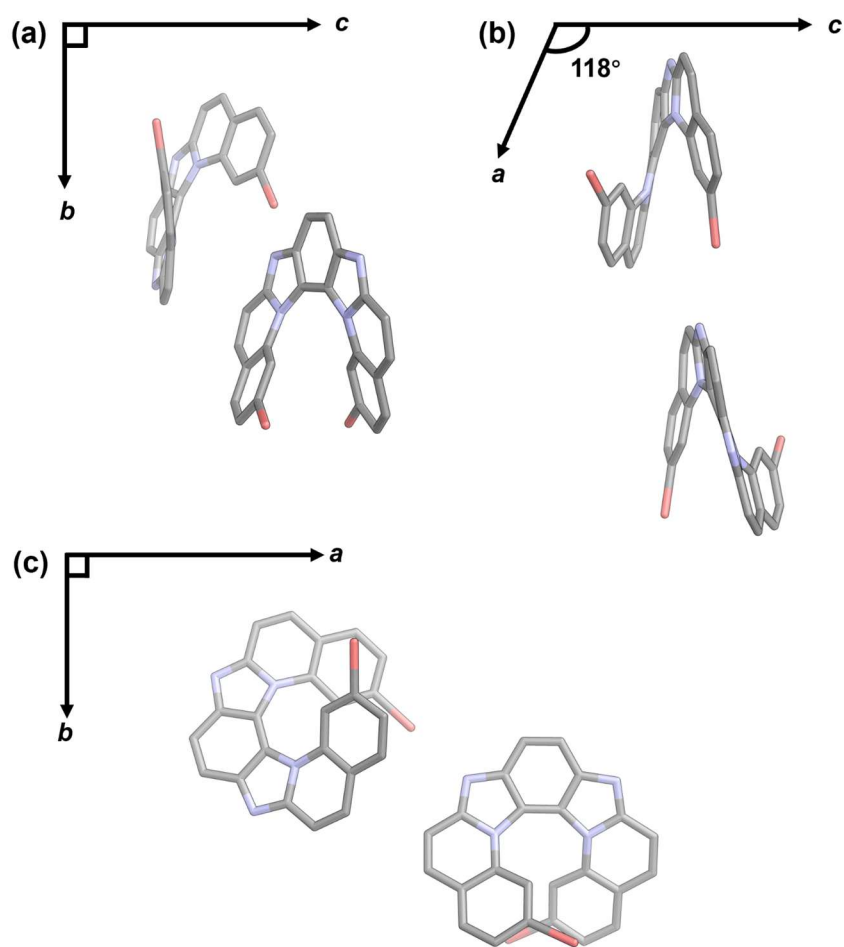

**Figure S19.** Single crystal structures of helicene *P-20*. Single crystals of *P-20* suitable for X-ray diffraction were obtained by slow vapor diffusion of methanol into dichloromethane solutions over 1 week at room temperature. (a–c) Helicene *P-20* in crystal view along (a) *a*-axis, (b) *b*-axis, and (c) *c*-axis.

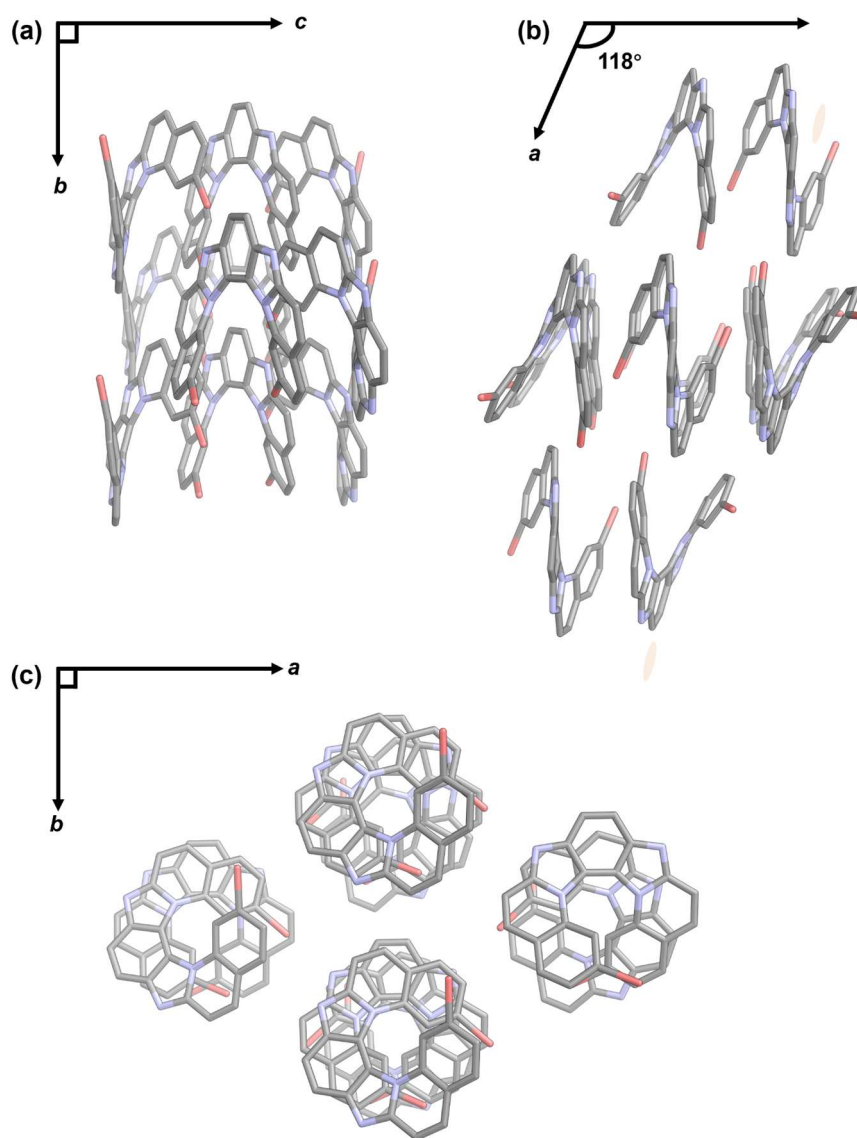

**Figure S20.** Packing diagram of crystal *P-20*. (a–c) *P-20* in crystal view along (a) *a*-axis, (b) *b*-axis, and (c) *c*-axis.

**Table S14. Crystal data and structure refinement for P-20**

| Identification code                         | P-20                                                           |
|---------------------------------------------|----------------------------------------------------------------|
| Empirical formula                           | C <sub>24</sub> H <sub>12</sub> Br <sub>2</sub> N <sub>4</sub> |
| Formula weight                              | 516.2                                                          |
| Temperature/K                               | 209                                                            |
| Crystal system                              | monoclinic                                                     |
| Space group                                 | C2                                                             |
| a/Å                                         | 20.0877(7)                                                     |
| b/Å                                         | 10.2487(3)                                                     |
| c/Å                                         | 15.6249(4)                                                     |
| α/°                                         | 90                                                             |
| β/°                                         | 117.8390(10)                                                   |
| γ/°                                         | 90                                                             |
| Volume/Å <sup>3</sup>                       | 2844.45(15)                                                    |
| Z                                           | 6                                                              |
| ρ <sub>calc</sub> /cm <sup>3</sup>          | 1.808                                                          |
| μ/mm <sup>-1</sup>                          | 4.295                                                          |
| F(000)                                      | 1524                                                           |
| Crystal size/mm <sup>3</sup>                | 0.42 × 0.12 × 0.08                                             |
| Radiation                                   | MoKα (λ = 0.71073)                                             |
| 2θ range for data collection/°              | 4.134 to 55.01                                                 |
| Index ranges                                | -26 ≤ h ≤ 26, -13 ≤ k ≤ 13, -20 ≤ l ≤ 19                       |
| Reflections collected                       | 40311                                                          |
| Independent reflections                     | 6511 [R <sub>int</sub> = 0.0737, R <sub>sigma</sub> = 0.0538]  |
| Data/restraints/parameters                  | 6511/1/406                                                     |
| Goodness-of-fit on F <sup>2</sup>           | 1.032                                                          |
| Final R indexes [I ≥ 2σ (I)]                | R <sub>1</sub> = 0.0271, wR <sub>2</sub> = 0.0542              |
| Final R indexes [all data]                  | R <sub>1</sub> = 0.0354, wR <sub>2</sub> = 0.0565              |
| Largest diff. peak/hole / e Å <sup>-3</sup> | 0.24/-0.47                                                     |
| Flack parameter                             | 0.012(5)                                                       |
| CCDC number                                 | 2522085                                                        |

## 6.1 Chiral HPLC separations

Analytical chiral HPLC separation for compound **6**

Analytical chiral HPLC: Chiralpak IE-3 (0.46 cm I.D. × 25 cm L), DCM/EtOAc/DEA = 80/20/0.1(V/V/V), 1.0 mL/min, UV detection at 254 nm.

Racemic mixture:

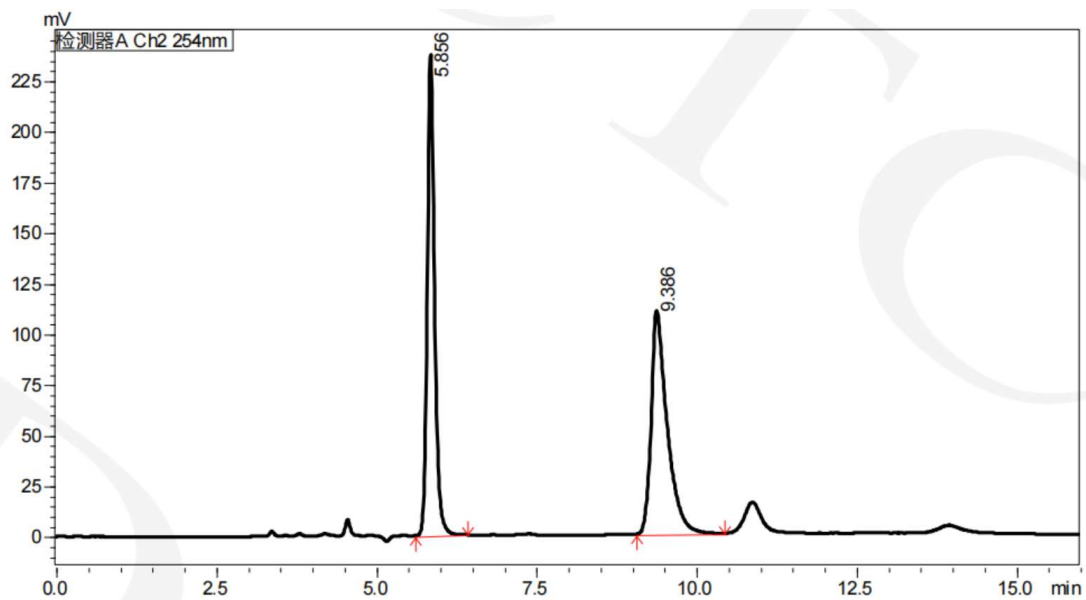

| Peak | Ret. Time | Area    | Area%  | T.Plake | Tailing | Resolution |
|------|-----------|---------|--------|---------|---------|------------|
| 1    | 5.856     | 1882777 | 49.710 | 12153   | 1.214   | --         |
| 2    | 9.386     | 1904743 | 50.290 | 7296    | 1.641   | 10.829     |

(+)-**6**:  $ee > 98\%$

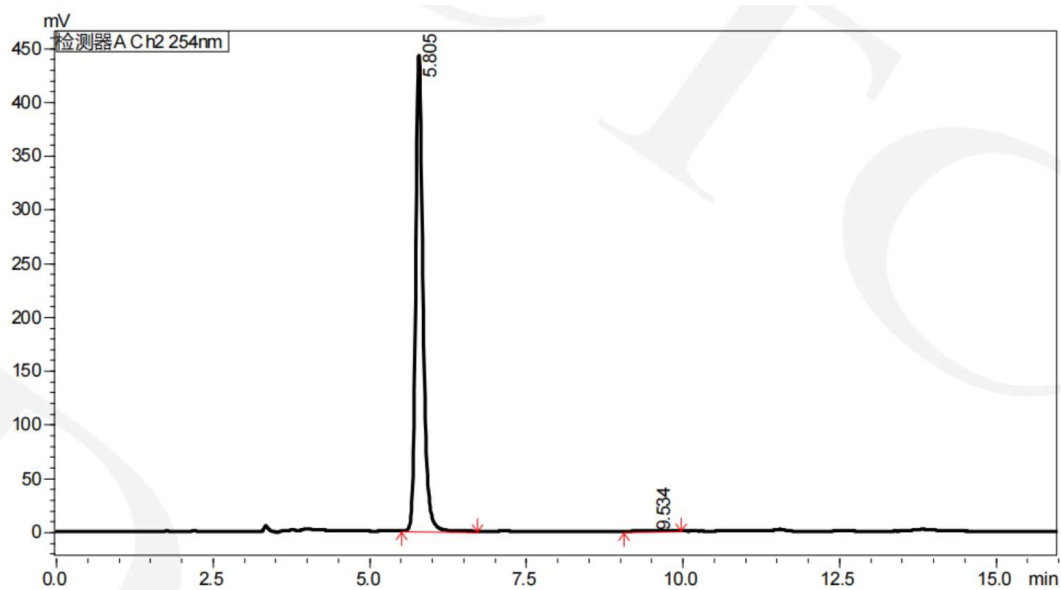

| Peak | Ret. Time | Area    | Area%  | T.Plake | Tailing | Resolution |
|------|-----------|---------|--------|---------|---------|------------|
| 1    | 5.805     | 3624115 | 99.615 | 11341   | 1.264   | --         |
| 2    | 9.534     | 13994   | 0.385  | 6832    | 1.012   | 10.977     |

(-)-**6**:  $ee > 98\%$

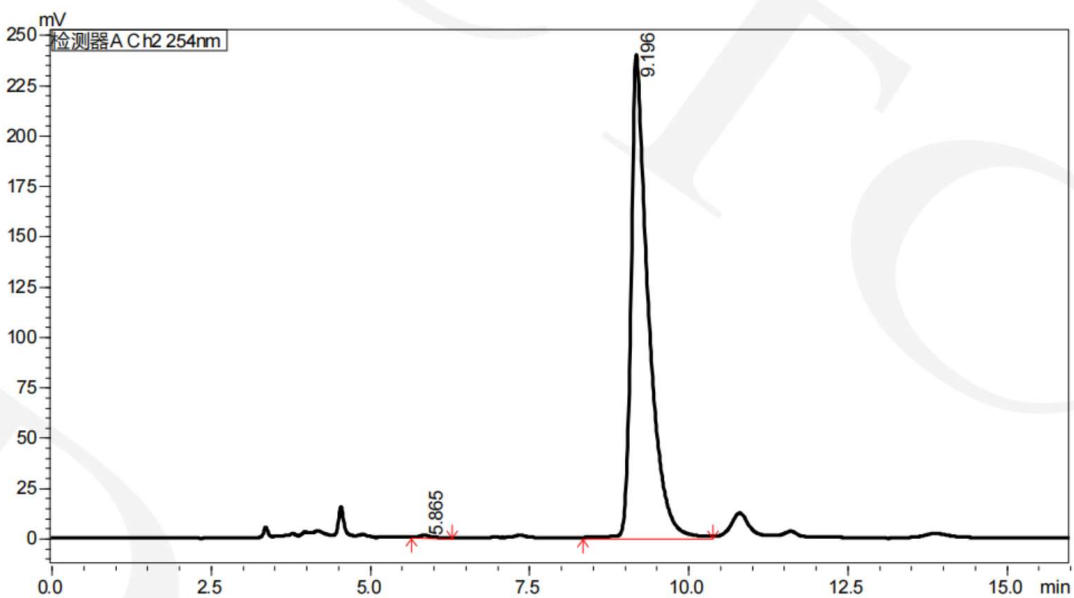

| Peak | Ret. Time | Area    | Area%  | T.Plake | Tailing | Resolution |
|------|-----------|---------|--------|---------|---------|------------|
| 1    | 5.865     | 10468   | 0.232  | 10068   | 1.177   | --         |
| 2    | 9.196     | 4494092 | 99.768 | 6061    | 1.893   | 9.431      |

Analytical chiral HPLC separation for compound **8**

Analytical chiral HPLC: Chiralpak IE (0.46 cm I.D. × 25 cm L), MeOH/DCM/DEA = 70/30/0.1 (V/V/V), 1.0 mL/min, UV detection at 254 nm.

Racemic mixture:

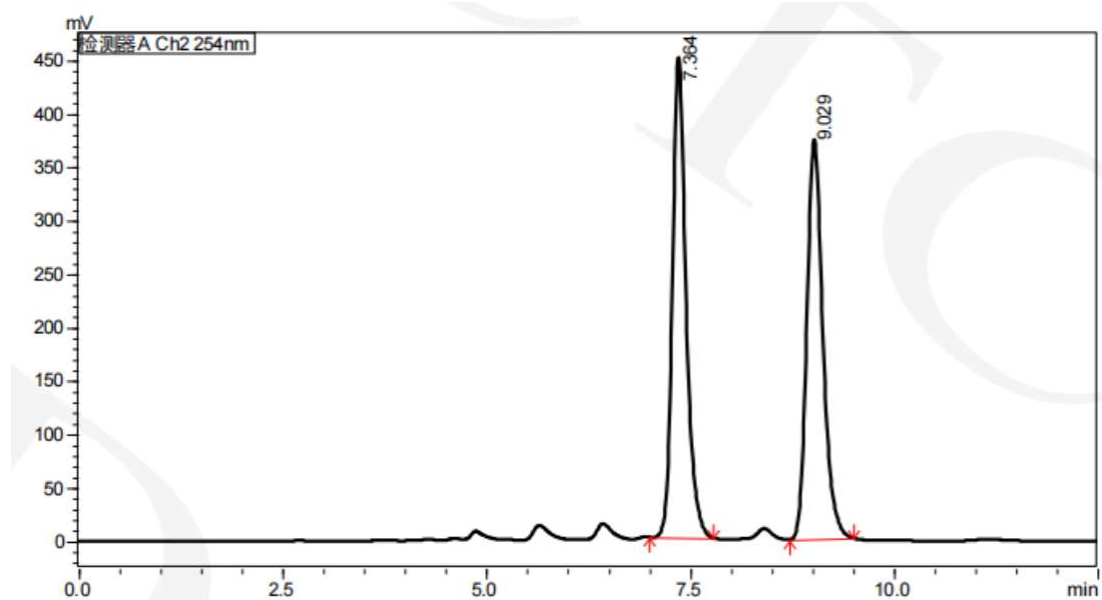

| Peak | Ret. Time | Area    | Area%  | T.Plata | Tailing | Resolution |
|------|-----------|---------|--------|---------|---------|------------|
| 1    | 7.364     | 5206797 | 50.446 | 9554    | 1.251   | --         |
| 2    | 9.029     | 5114673 | 49.554 | 10090   | 1.226   | 5.039      |

(+)-**8**:  $ee > 98\%$

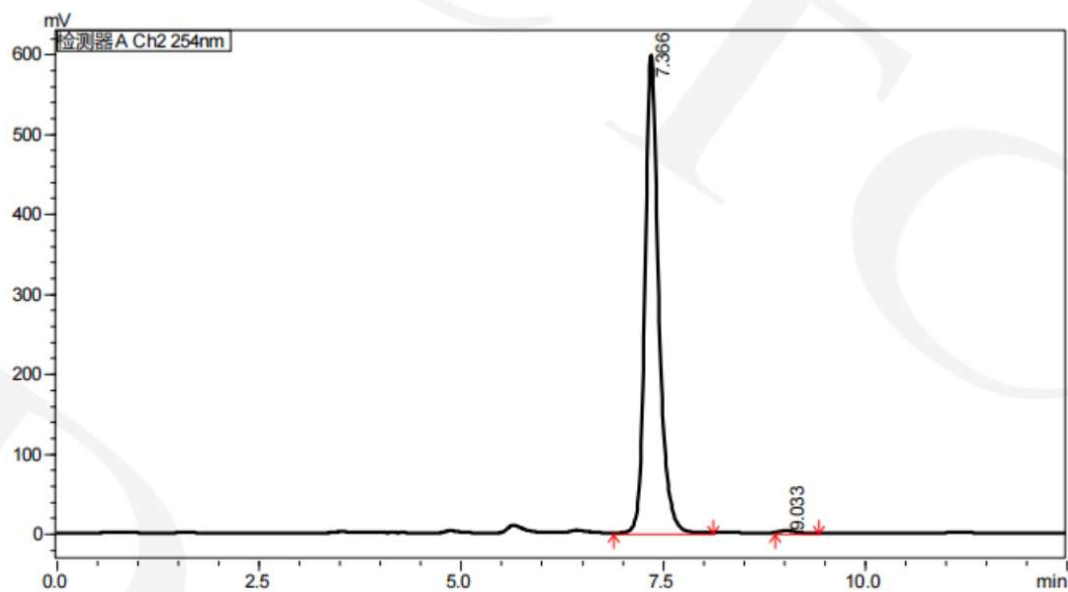

| Peak | Ret. Time | Area    | Area%  | T.Plata | Tailing | Resolution |
|------|-----------|---------|--------|---------|---------|------------|
| 1    | 7.366     | 7056994 | 99.423 | 9440    | 1.255   | --         |
| 2    | 9.033     | 5114673 | 0.577  | 10066   | --      | 5.027      |

(-)-**8**:  $ee > 98\%$

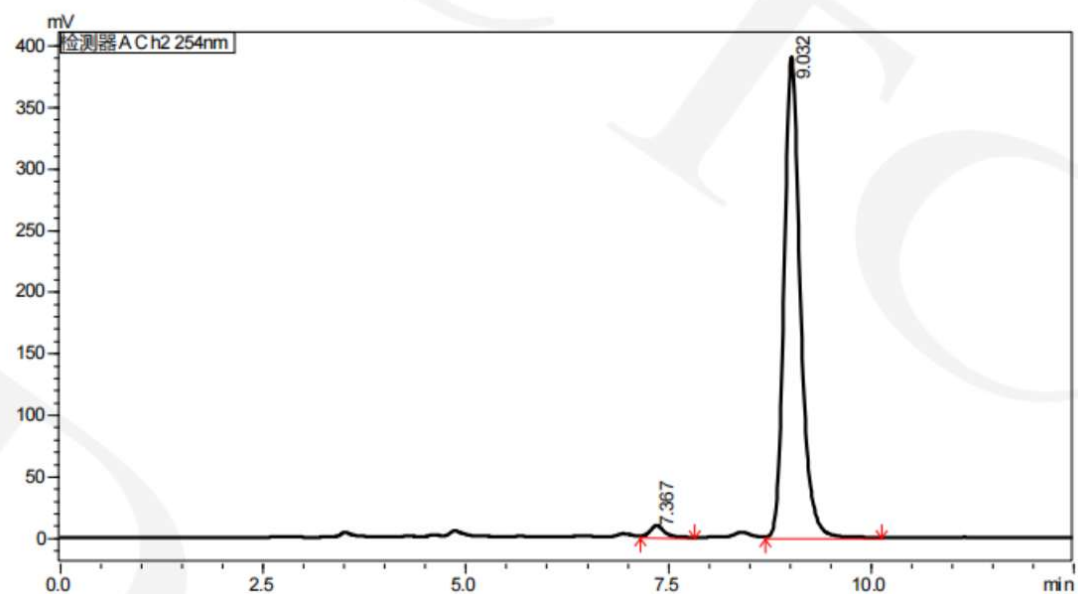

| Peak | Ret. Time | Area    | Area%  | T.Plata | Tailing | Resolution |
|------|-----------|---------|--------|---------|---------|------------|
| 1    | 7.367     | 112492  | 2.035  | 8735    | --      | --         |
| 2    | 9.032     | 5416077 | 97.965 | 10031   | 1.243   | 4.927      |

Analytical chiral HPLC separation for compound **11**

Analytical chiral HPLC: Chiralpak IH (0.46 cm I.D. × 15 cm L), MeOH = 100%, 1.0 mL/min,

UV detection at 254 nm.

Racemic mixture:

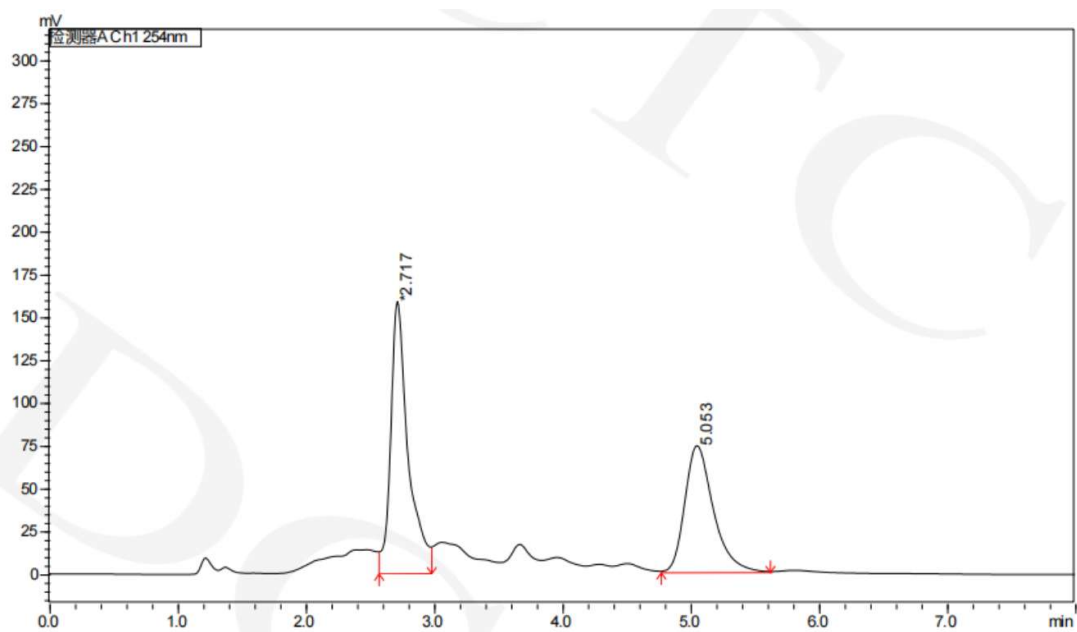

| Peak | Ret. Time | Area    | Area%  | T.Plates | Tailing | Resolution |
|------|-----------|---------|--------|----------|---------|------------|
| 1    | 2.717     | 1494521 | 56.962 | 2261     | --      | --         |
| 2    | 5.053     | 1129210 | 43.038 | 2573     | 1.355   | 7.452      |

**P-11:**  $ee > 98\%$ 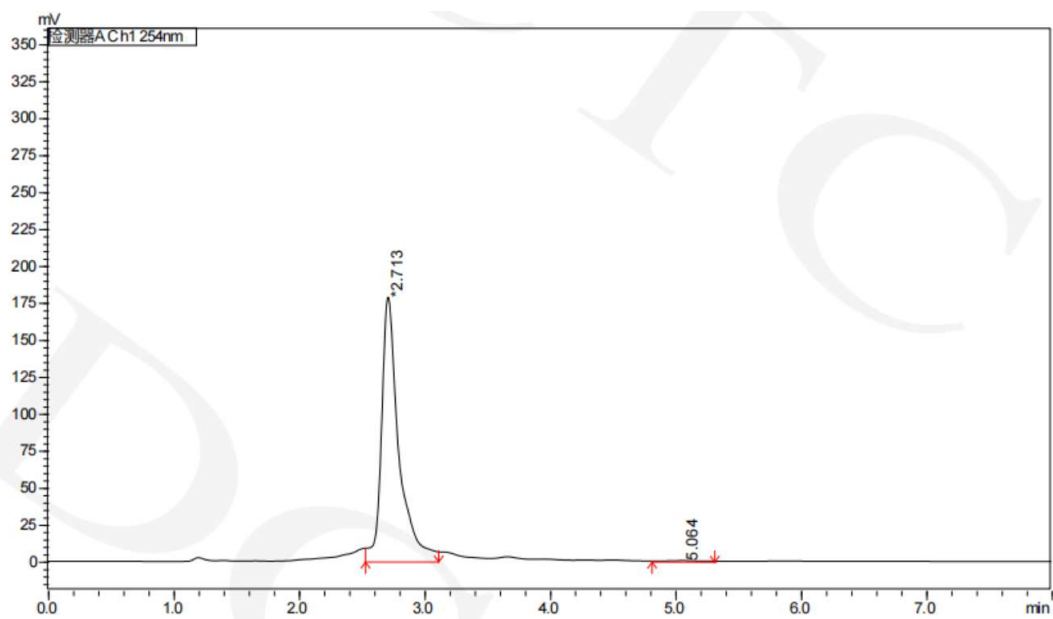

| Peak | Ret. Time | Area    | Area%  | T.Plake | Tailing | Resolution |
|------|-----------|---------|--------|---------|---------|------------|
| 1    | 2.713     | 1709137 | 99.736 | 2318    | 1.505   | --         |
| 2    | 5.064     | 4521    | 0.264  | 3046    | --      | 7.938      |

**M-11:**  $ee > 98\%$ 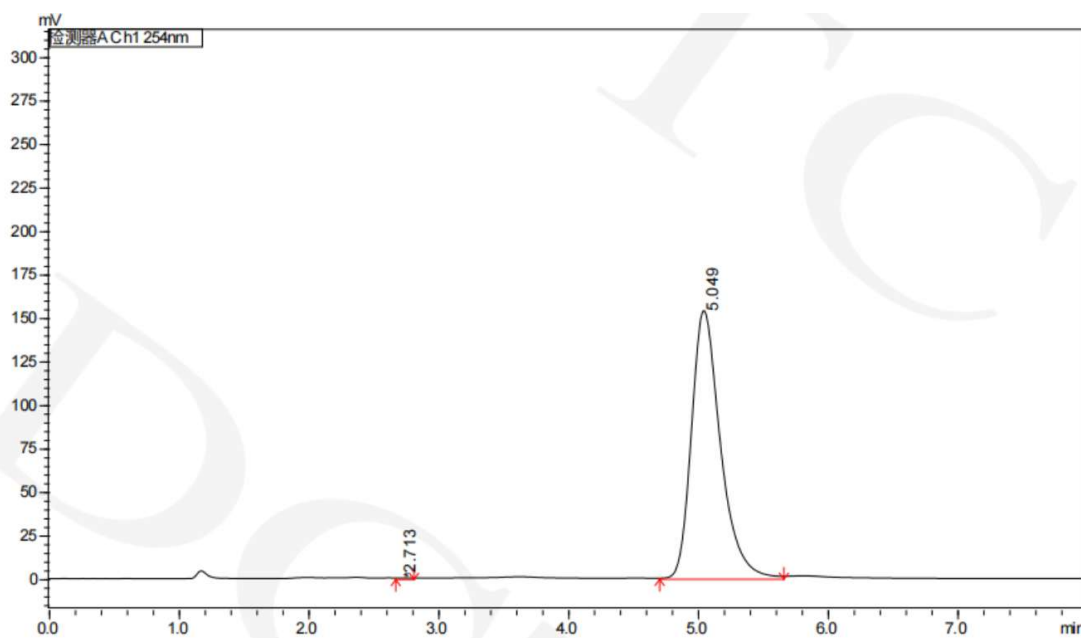

| Peak | Ret. Time | Area    | Area%  | T.Plake | Tailing | Resolution |
|------|-----------|---------|--------|---------|---------|------------|
| 1    | 2.713     | 2317    | 0.097  | 193     | --      | --         |
| 2    | 5.049     | 2385950 | 99.903 | 2537    | 1.353   | 3.953      |

Analytical chiral HPLC separation for compound **13**

Analytical chiral HPLC: Chiralpak IB N-5 (0.46 cm I.D. × 25 cm L), MeOH/ACN/NH<sub>3</sub> in MeOH = 50/50/0.1 (V/V/V), 1.0 mL/min, UV detection at 254 nm.

Racemic mixture:

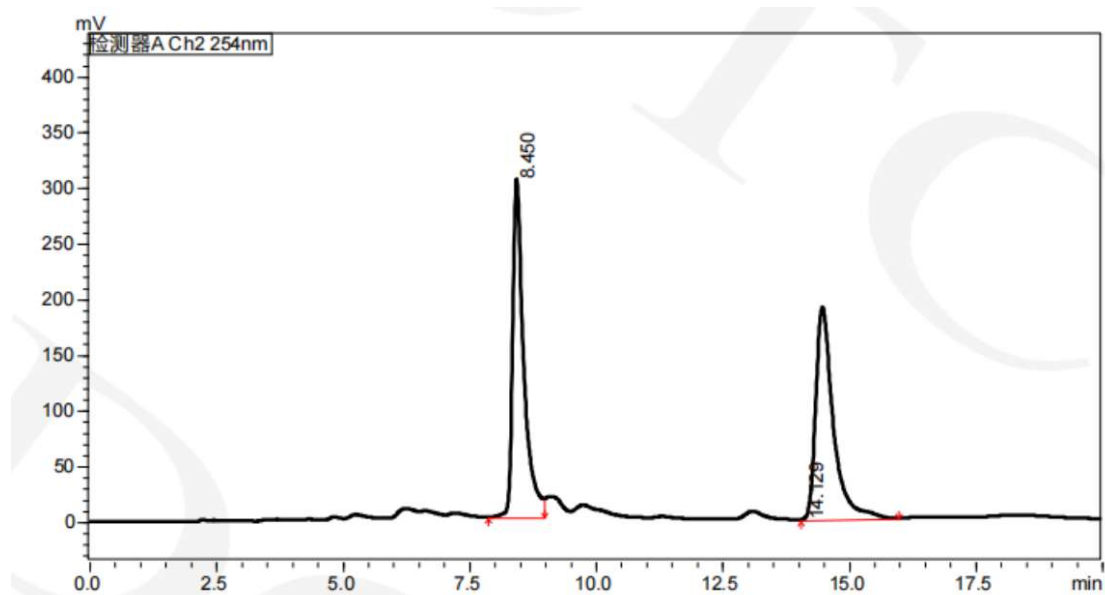

| Peak | Ret. Time | Area    | Area%  | T.Plate | Tailing | Resolution |
|------|-----------|---------|--------|---------|---------|------------|
| 1    | 8.450     | 4628606 | 50.261 | 8531    | --      | --         |
| 2    | 14.129    | 4580448 | 49.739 | 1160    | 15.010  | 5.608      |

(+)-13:  $ee > 98\%$

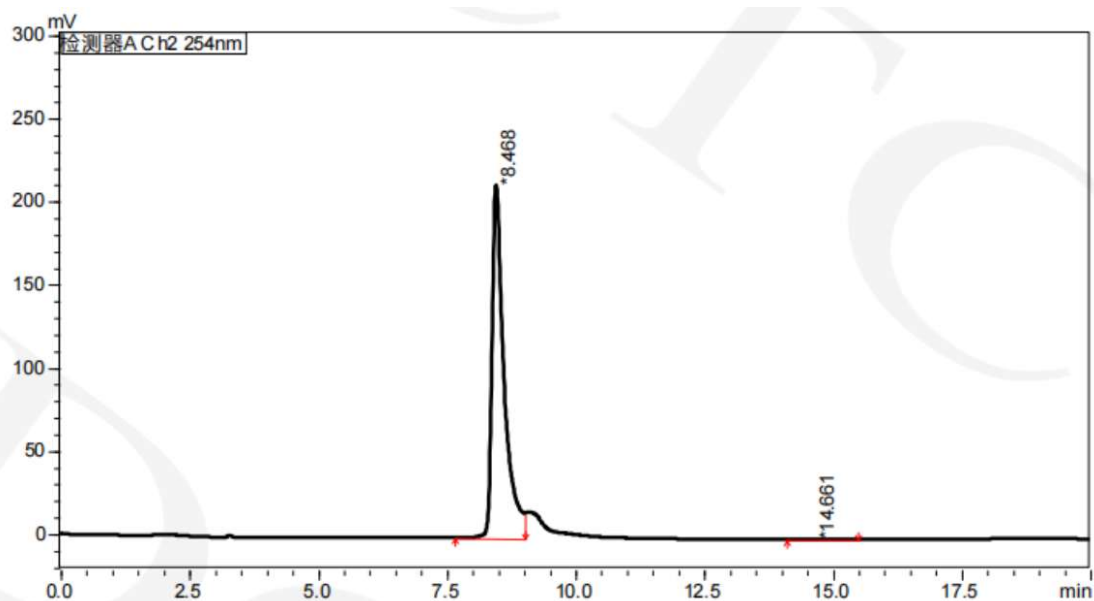

| Peak | Ret. Time | Area    | Area%  | T.Plake | Tailing | Resolution |
|------|-----------|---------|--------|---------|---------|------------|
| 1    | 8.468     | 3477301 | 99.707 | 7681    | --      | --         |
| 2    | 14.661    | 10204   | 0.293  | 5813    | 1.651   | 10.718     |

(-)-13:  $ee > 98\%$

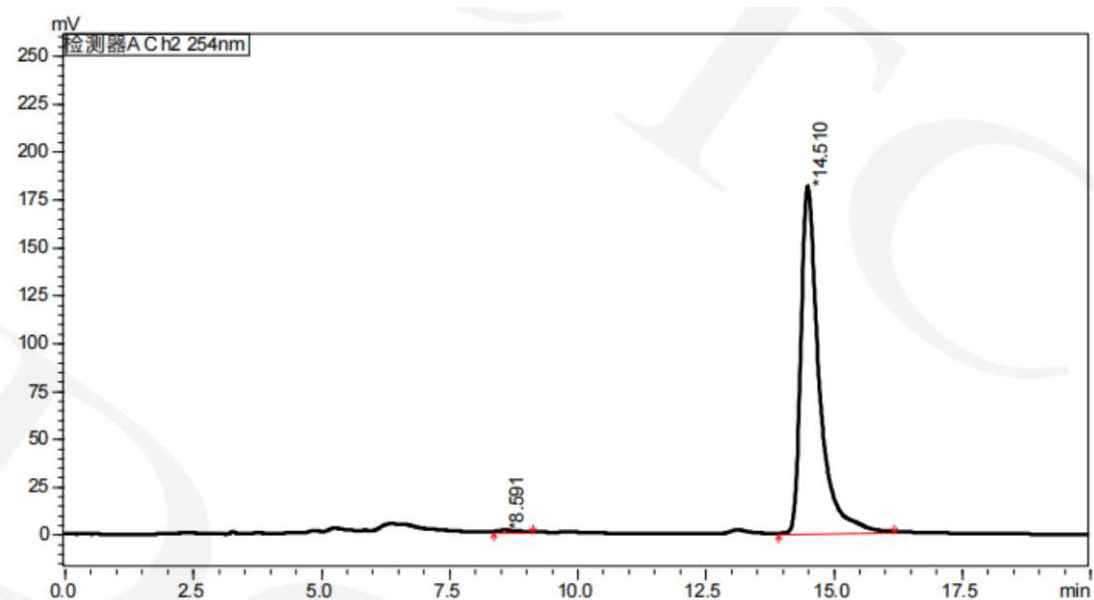

| Peak | Ret. Time | Area    | Area%  | T.Plake | Tailing | Resolution |
|------|-----------|---------|--------|---------|---------|------------|
| 1    | 8.591     | 15970   | 0.358  | 2528    | 1.626   | --         |
| 2    | 14.510    | 4448692 | 99.642 | 9750    | 1.731   | 9.314      |

Analytical chiral HPLC separation for compound **14**

Analytical chiral HPLC: Chiralpak IE-3 (0.46 cm I.D. × 25 cm L), DCM/EtOAc/DEA = 80/20/0.1 (V/V/V), 1.0 mL/min, UV detection at 254 nm.

Racemic mixture:

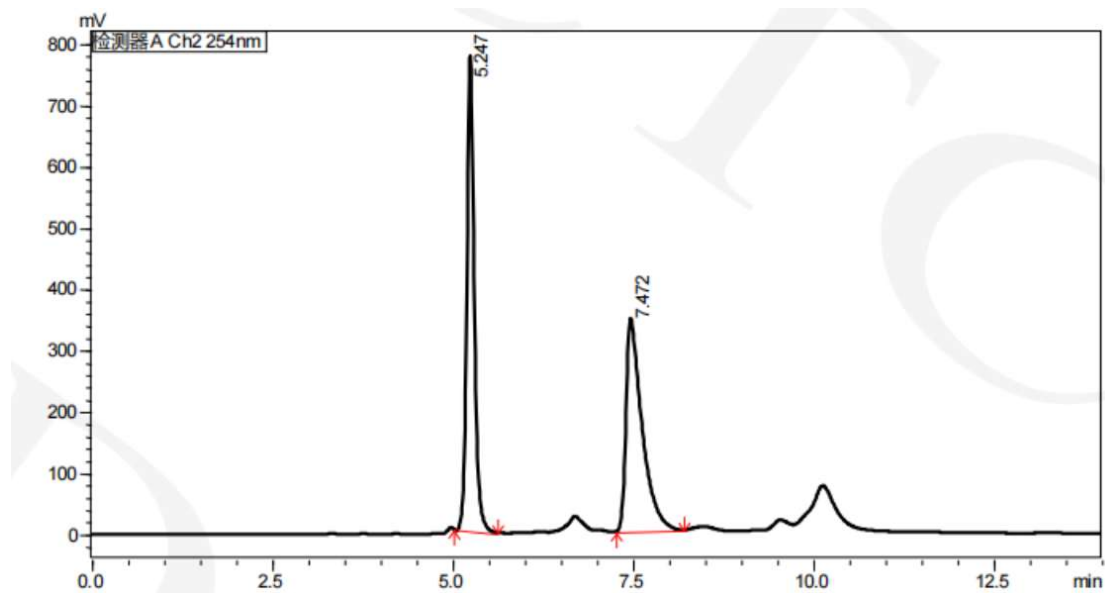

| Peak | Ret. Time | Area    | Area%  | T.Plate | Tailing | Resolution |
|------|-----------|---------|--------|---------|---------|------------|
| 1    | 5.247     | 5470273 | 50.506 | 12042   | 1.173   | --         |
| 2    | 7.472     | 5360647 | 49.494 | 5536    | 2.130   | 7.504      |

(+)-14:  $ee > 98\%$

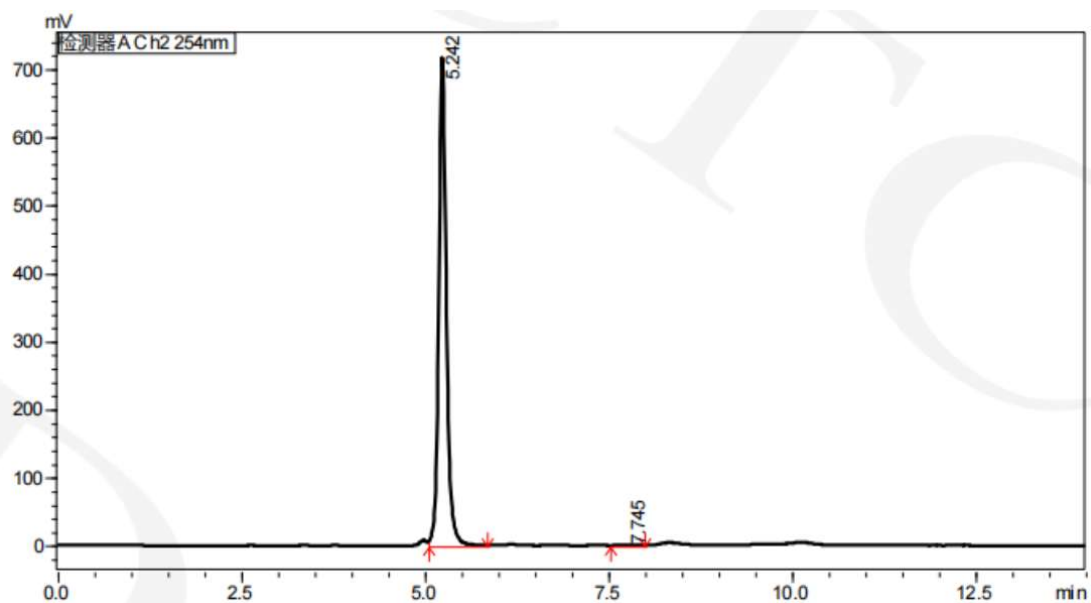

| Peak | Ret. Time | Area    | Area%  | T.Plake | Tailing | Resolution |
|------|-----------|---------|--------|---------|---------|------------|
| 1    | 5.242     | 5188607 | 99.705 | 11828   | 1.158   | --         |
| 2    | 7.745     | 15346   | 0.295  | 2168    | --      | 5.833      |

(-)-14:  $ee > 98\%$

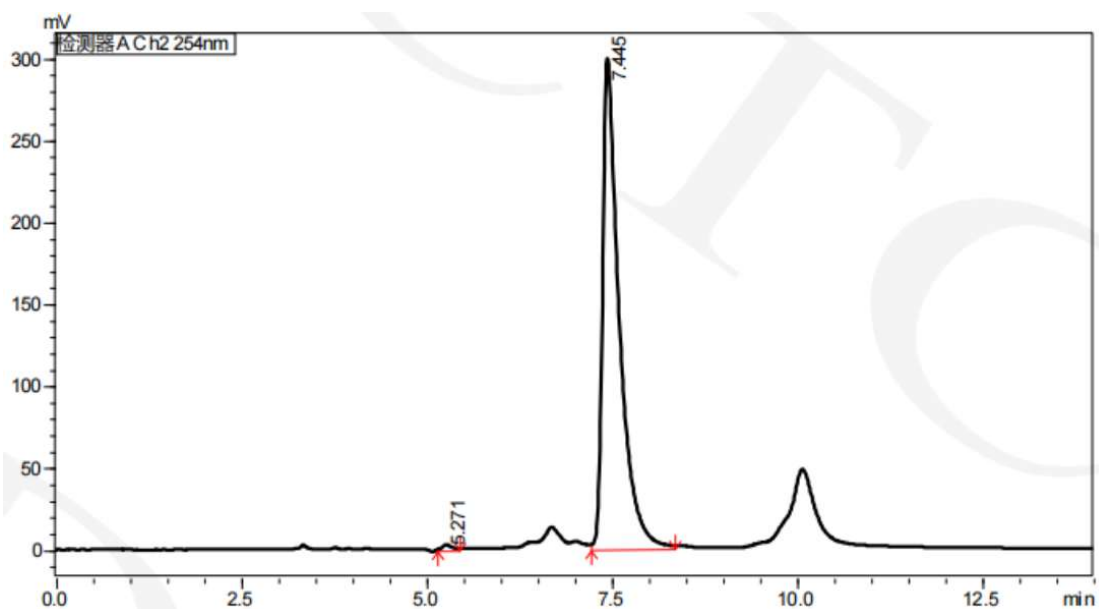

| Peak | Ret. Time | Area    | Area%  | T.Plake | Tailing | Resolution |
|------|-----------|---------|--------|---------|---------|------------|
| 1    | 5.271     | 29205   | 0.618  | 6948    | --      | --         |
| 2    | 7.445     | 4699209 | 99.382 | 5801    | 2.144   | 6.753      |

Analytical chiral HPLC separation for compound **20**

Analytical chiral HPLC: Chiralpak IM (0.46 cm I.D. × 15 cm L), DCM/MeOH = 80/20 (V/V),

1.0 mL/min, UV detection at 254 nm.

Racemic mixture:

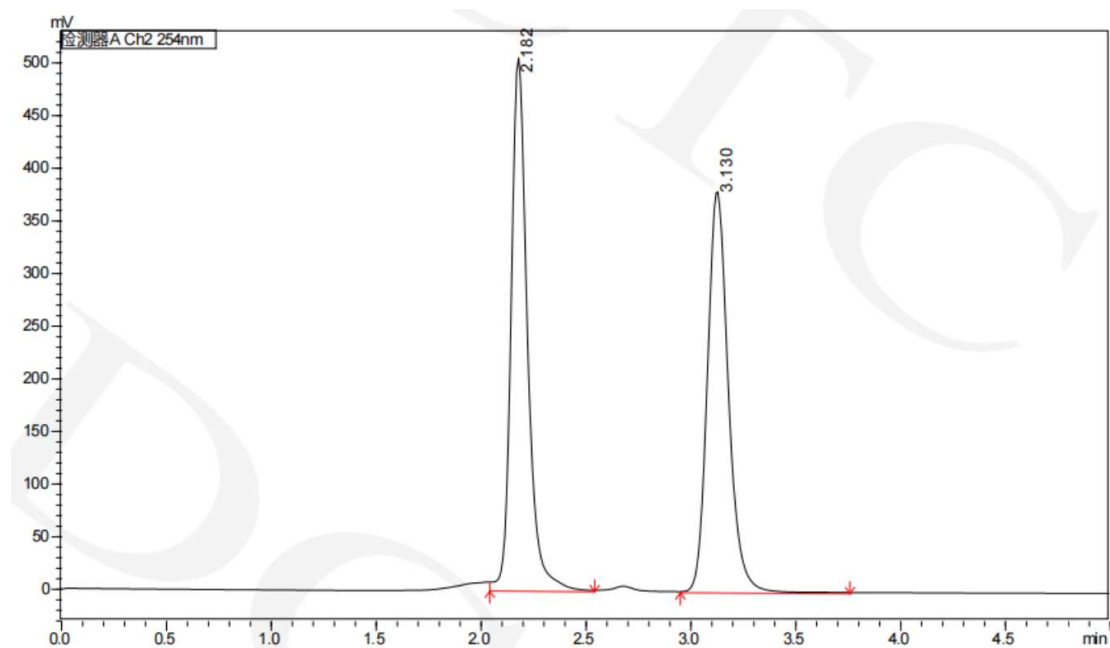

| Peak | Ret. Time | Area    | Area%  | T.Plate | Tailing | Resolution |
|------|-----------|---------|--------|---------|---------|------------|
| 1    | 2.182     | 2732628 | 51.046 | 3380    | 1.261   | --         |
| 2    | 3.130     | 2620688 | 48.954 | 4366    | 1.187   | 5.580      |

**M-20:**  $ee > 98\%$ 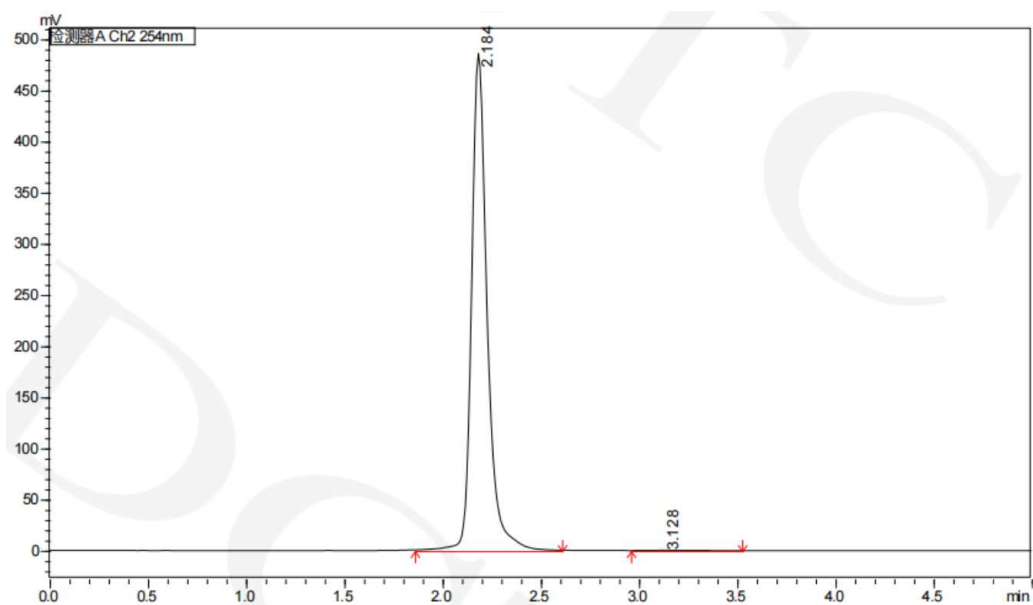

| Peak | Ret. Time | Area    | Area%  | T.Plates | Tailing | Resolution |
|------|-----------|---------|--------|----------|---------|------------|
| 1    | 2.184     | 2688809 | 99.869 | 3271     | 1.304   | --         |
| 2    | 3.128     | 3520    | 0.131  | 2626     | 1.588   | 4.754      |

**P-20:**  $ee > 98\%$ 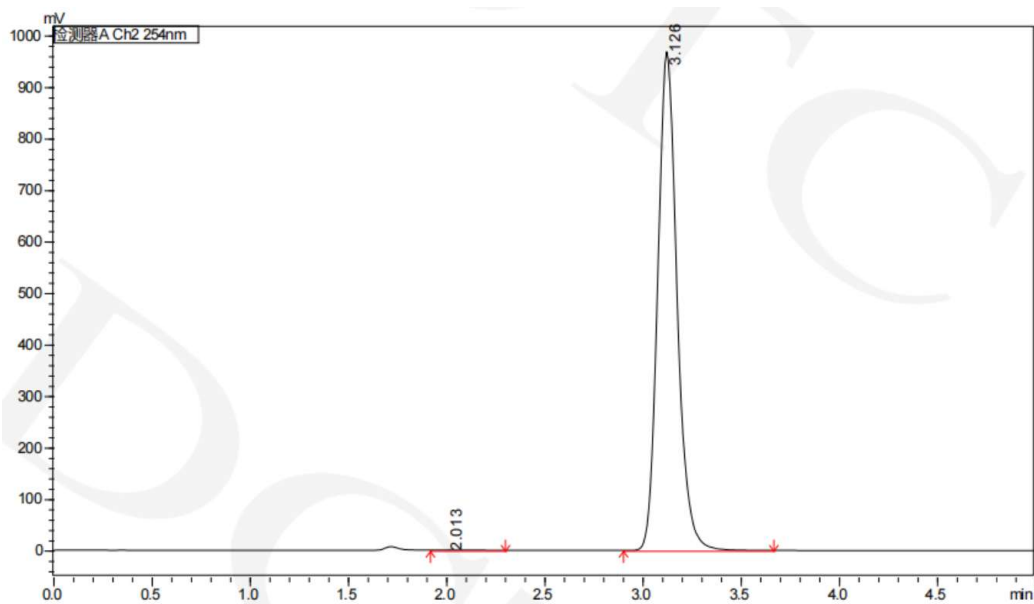

| Peak | Ret. Time | Area    | Area%  | T.Plates | Tailing | Resolution |
|------|-----------|---------|--------|----------|---------|------------|
| 1    | 2.013     | 9451    | 0.143  | 337      | --      | --         |
| 2    | 3.126     | 6608466 | 99.857 | 4405     | 1.178   | 3.552      |

## 7 Photophysical Properties

### 7.1 UV-Vis Absorption and Fluorescence

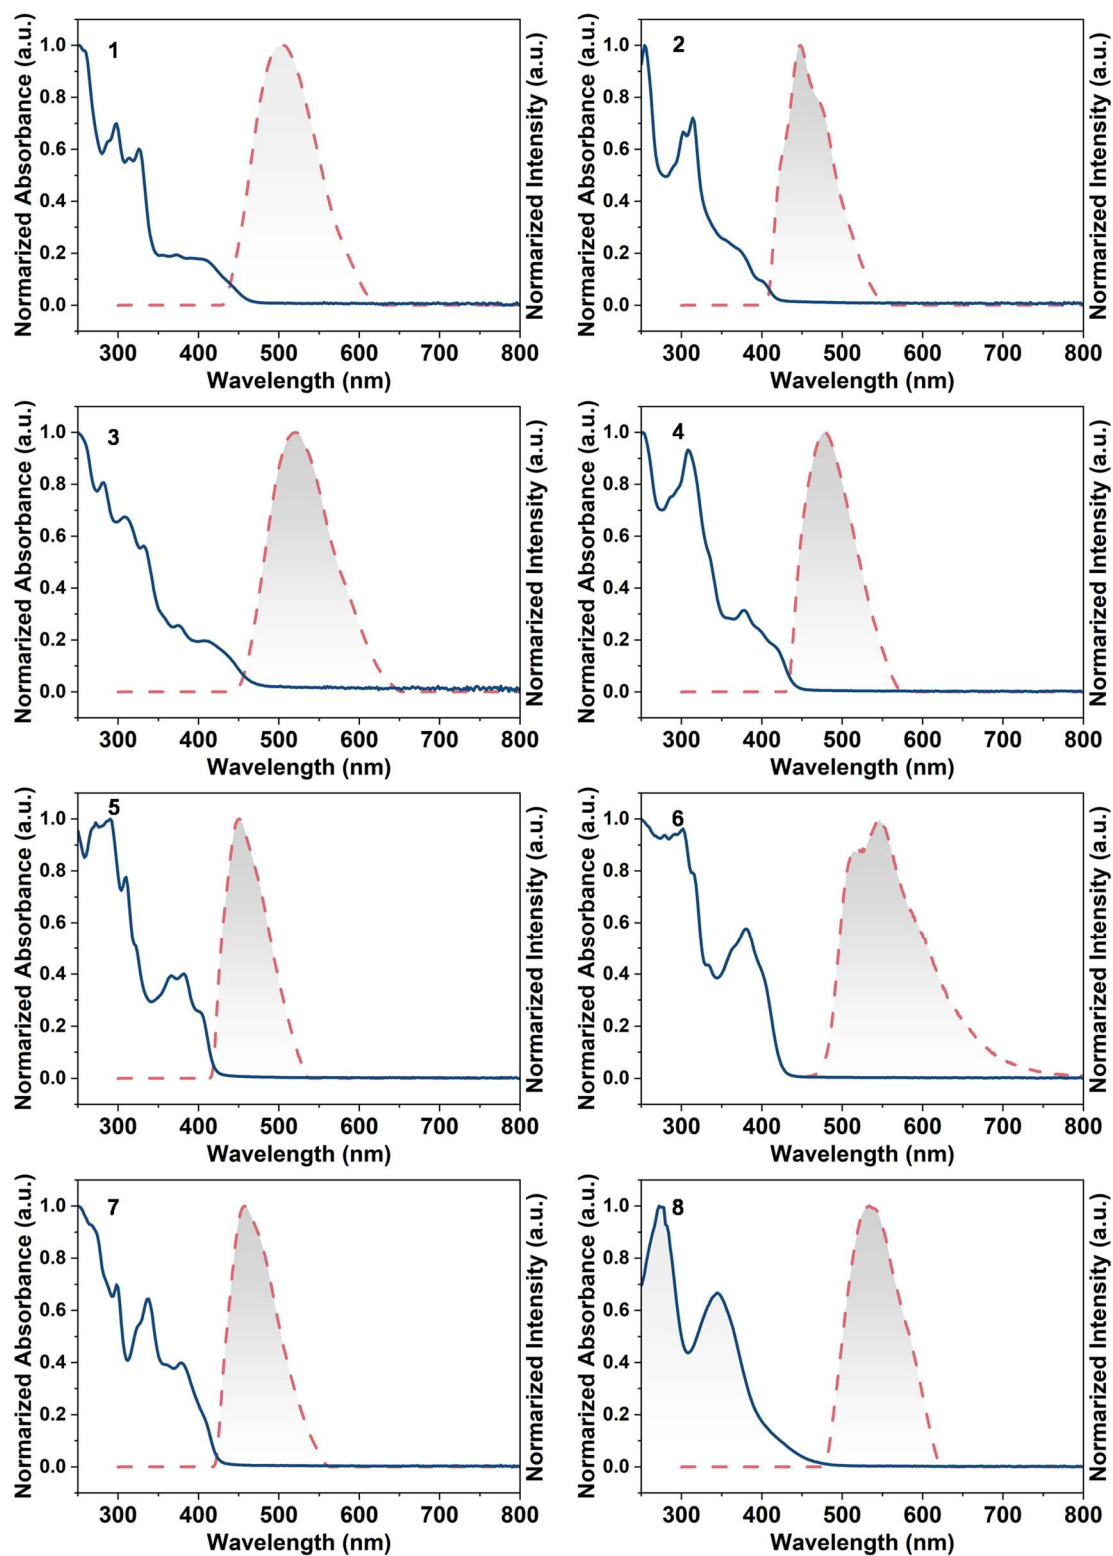

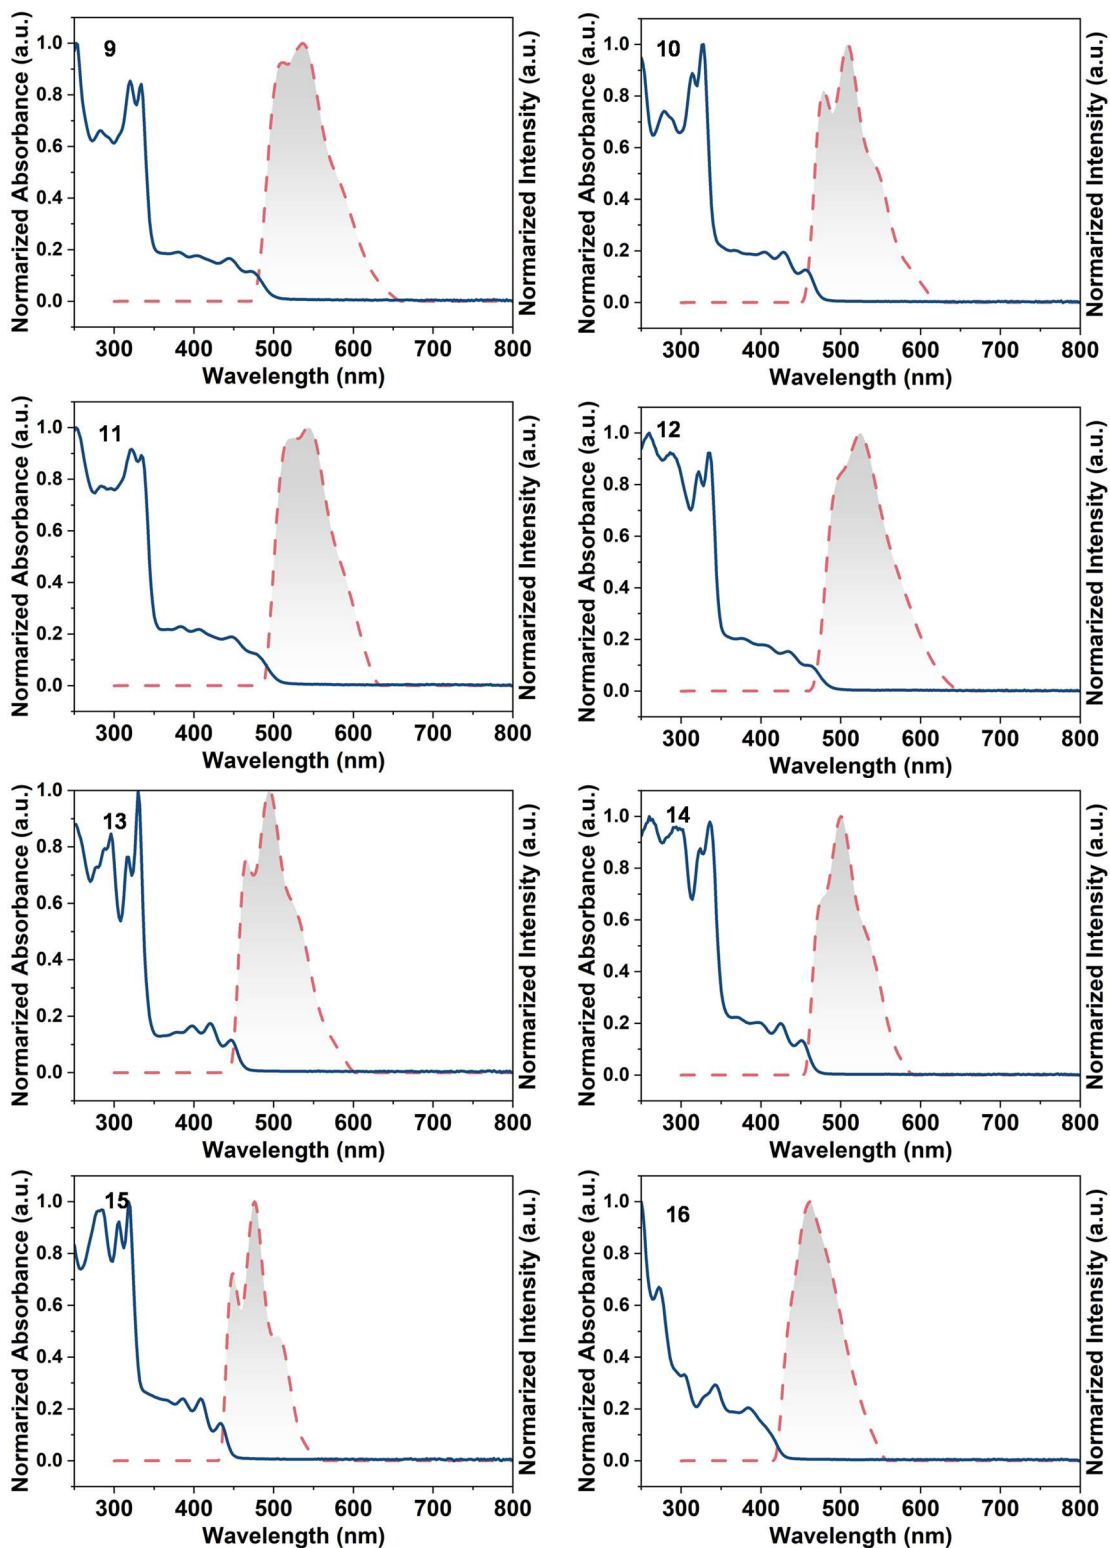

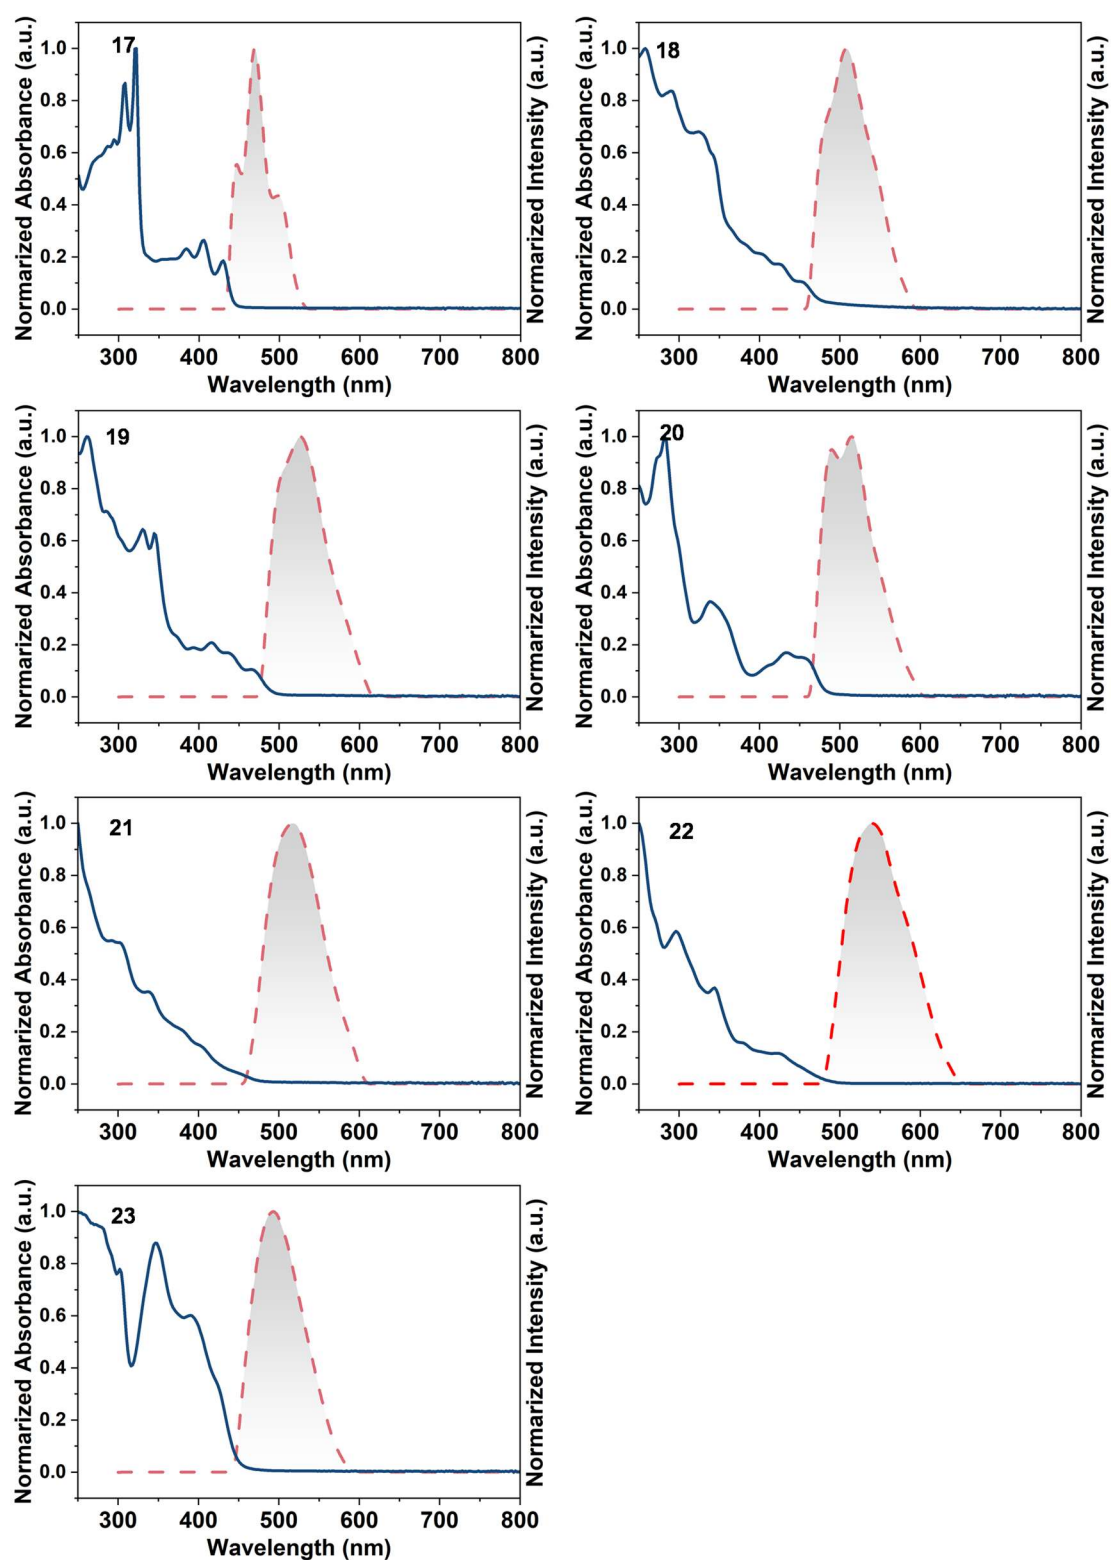

Figure S21. Absorption and fluorescence spectra of aza[5-9]helicenes 1-23

## 7.2 Circular Dichroism (CD)

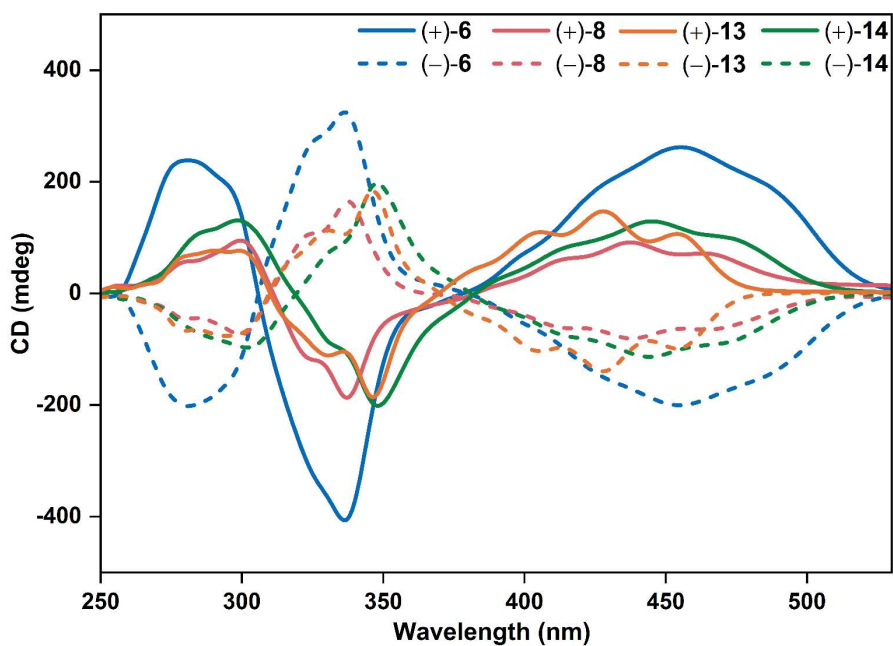

Figure S22. CD spectra of 6, 8, 13 and 14 in DCM (7.00 × 10<sup>-5</sup> M, 298 K)

## 7.3 Circularly polarized luminescence (CPL)

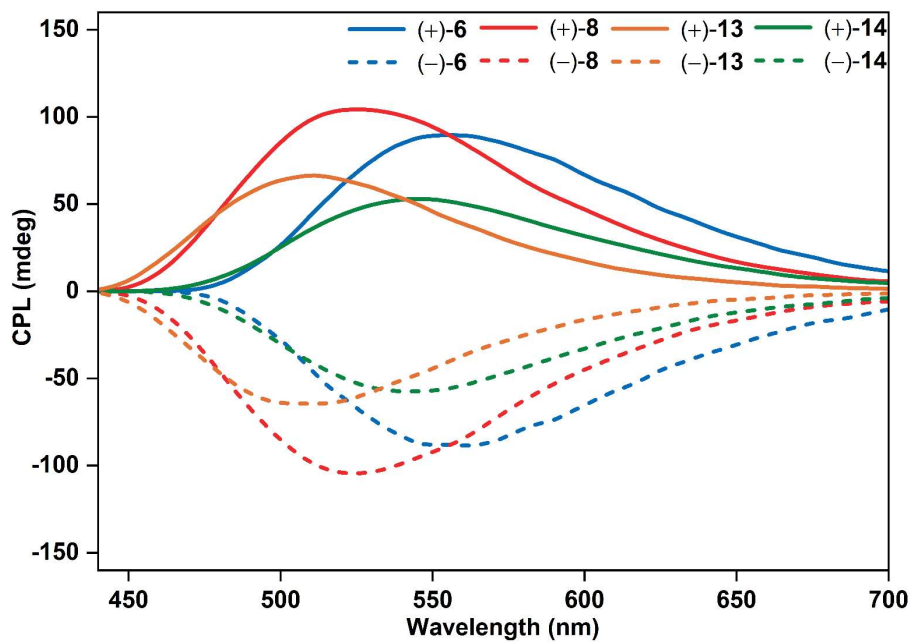

Figure S23. CPL (Ex at 340 nm) spectra of 6, 8, 13 and 14 in DCM (7.00 × 10<sup>-5</sup> M, 298 K)

**Table 15.** Photophysical properties of aza[5–9]helicenes.

| Helicene <sup>a</sup> | $\lambda_{\max(\text{abs})}$ (nm) <sup>b</sup> | $\lambda_{\max(\text{em})}$ (nm) <sup>b,c</sup> | $\Phi$ <sup>c,d</sup> | $g_{\text{lum}}$ <sup>e,f</sup> |
|-----------------------|------------------------------------------------|-------------------------------------------------|-----------------------|---------------------------------|
| <b>1 [5]H.</b>        | 410                                            | 505                                             | 0.46                  | -                               |
| <b>18 [6]H.</b>       | 455                                            | 508                                             | 0.45                  | -                               |
| <b>6 [7]H.</b>        | 404                                            | 550                                             | 0.37                  | 0.012                           |
| <b>8 [7]H.</b>        | 423                                            | 535                                             | 0.34                  | 0.014                           |
| <b>11 [7]H.</b>       | 480                                            | 544                                             | 0.29                  | 0.0083                          |
| <b>13 [7]H.</b>       | 448                                            | 495                                             | 0.35                  | 0.0088                          |
| <b>14 [7]H.</b>       | 452                                            | 500                                             | 0.47                  | 0.0065                          |
| <b>20 [7]H.</b>       | 459                                            | 516                                             | 0.03                  | 0.0080                          |
| <b>21 [8]H.</b>       | 446                                            | 518                                             | 0.11                  | 0.008 <sup>g</sup>              |
| <b>22 [9]H.</b>       | 427                                            | 541                                             | 0.04                  | 0.027 <sup>g</sup>              |

<sup>[a]</sup>[n]H short for [n]helicene. <sup>[b]</sup>Concentration:  $7.00 \times 10^{-5}$  M in  $\text{CH}_2\text{Cl}_2$ . <sup>[c]</sup>Excitation wavelength: **1**: 410 nm, **18**: 450 nm, **6**: 400nm, **8**: 420, **11**: 470 nm, **13**: 460 nm, **14**: 450 nm, **20**: 470 nm, **21**: 400 nm, **22**: 425 nm. <sup>[d]</sup>Concentration:  $7.00 \times 10^{-6}$  M in  $\text{CH}_2\text{Cl}_2$ . <sup>[e]</sup>CPL excitation wavelength: **6**: 340 nm, **8**: 340 nm, **11**: 320 nm, **13**: 335 nm, **14**: 340 nm, **20**: 337 nm. <sup>[f]</sup>CPL emission wavelength: **6**: 550 nm, **8**: 530 nm, **11**: 480 nm, **13**: 504 nm, **14**: 523 nm, **20**: 470 nm. <sup>[g]</sup> $g_{\text{lum}}$  values taken from reference 2.<sup>2</sup>

## 8 DFT Calculations

LUMO

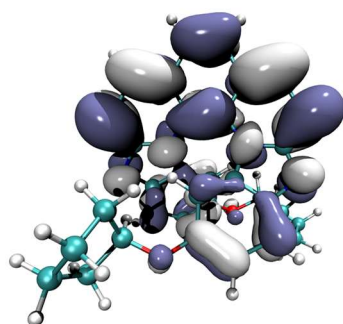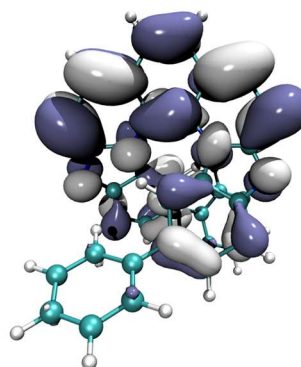

HOMO

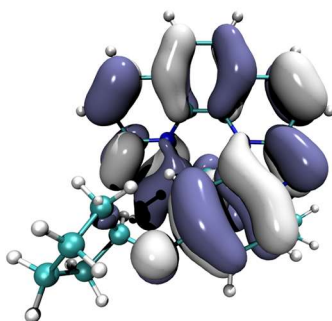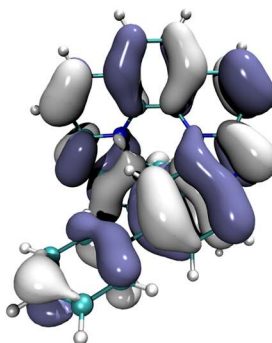

6

8

LUMO

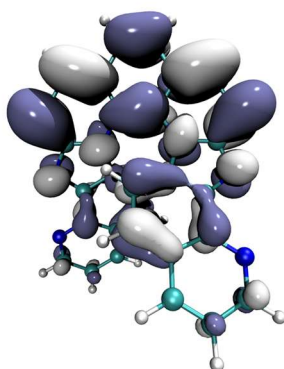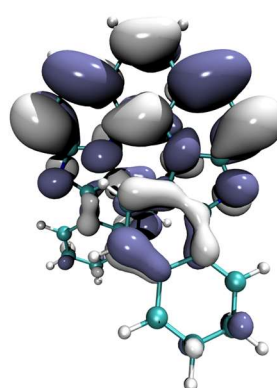

HOMO

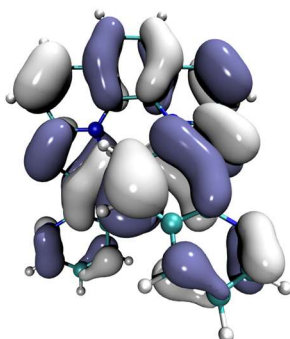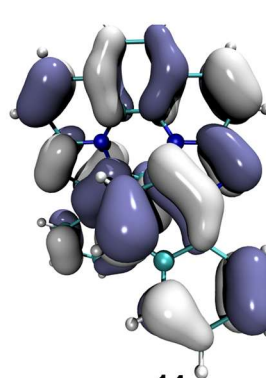

13

14

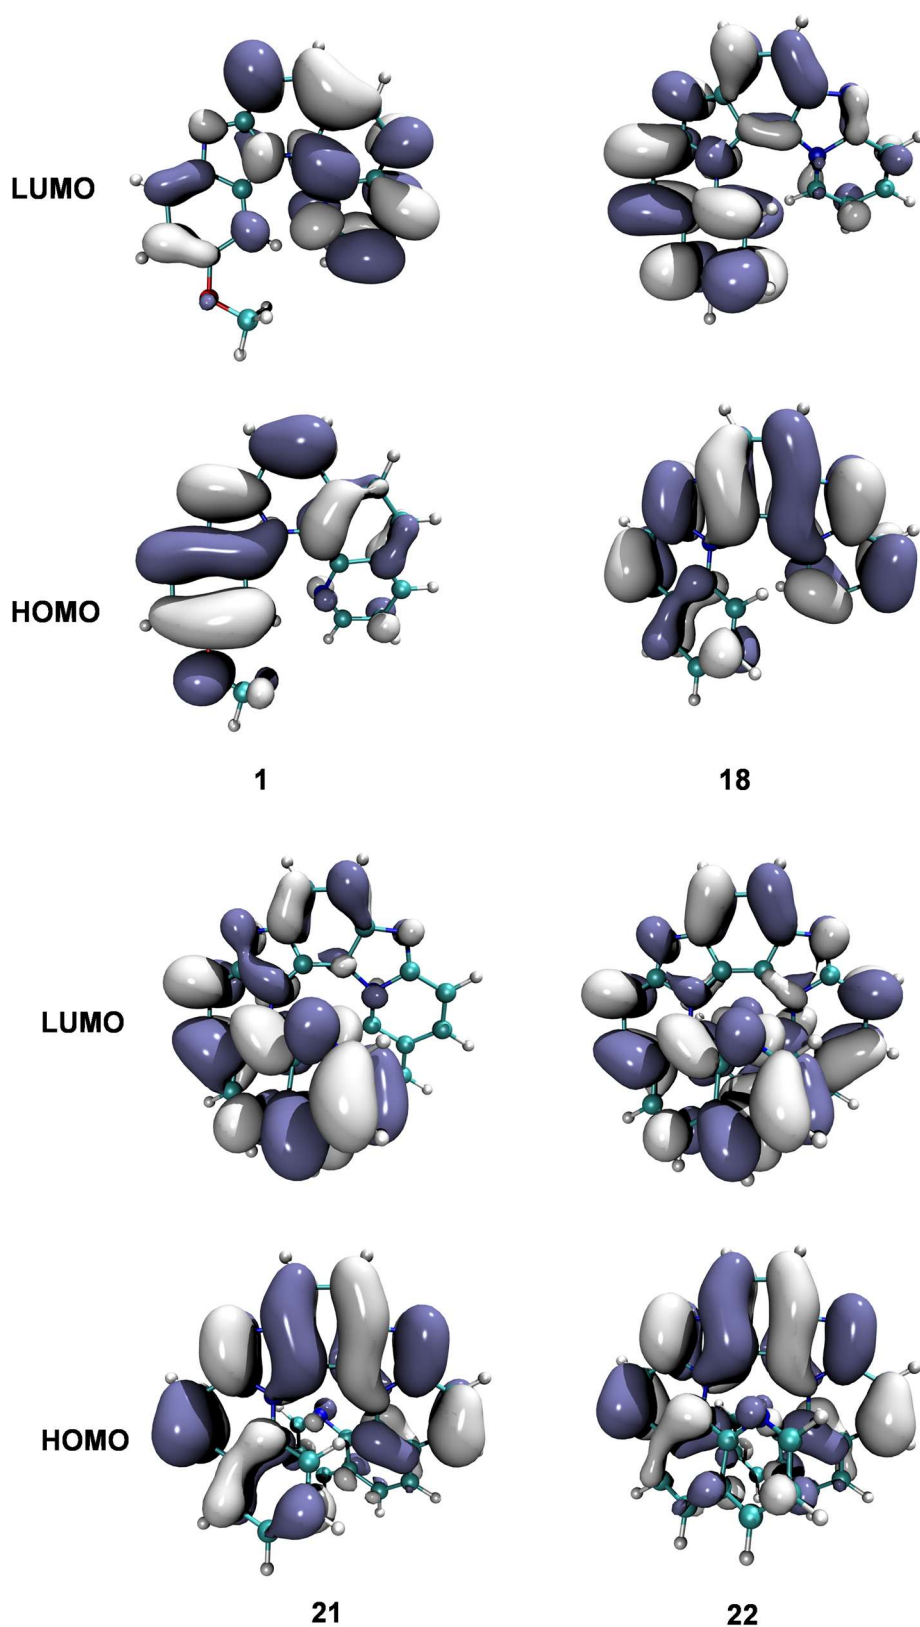

Figure S24. LUMOs and HOMOs of [5-9]helicenes 1, 6, 8, 13, 14, 18, 21 and 22 calculated at B3LYP/6-31G(d) level.

## 9 AFM Topography of the Thin Films of Helicene Enantiomers

AFM experiments were carried out to visualize the morphology of the helicene enantiomers of **11** and **20**. Samples were prepared by spin-coating a 10  $\mu\text{M}$  DCM solution of the corresponding assembly onto freshly cleaved HPOG. The results are summarized below.

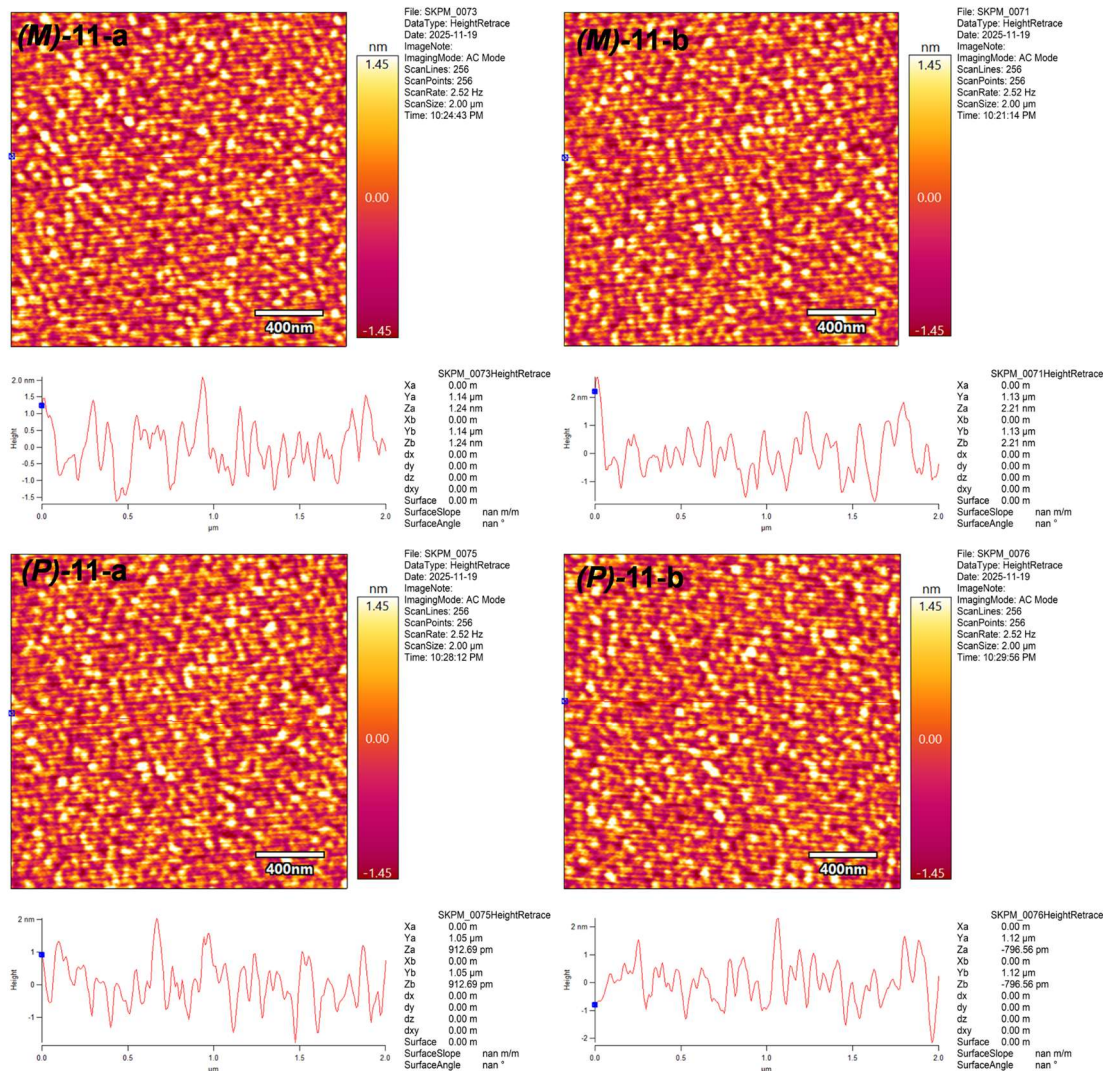

**Figure S25.** AFM studies for **(M)-11** and **(P)-11**. Insets: AFM height profile of the red line drawn in the AFM image. Note that the scanning area is different for (a) and (b).

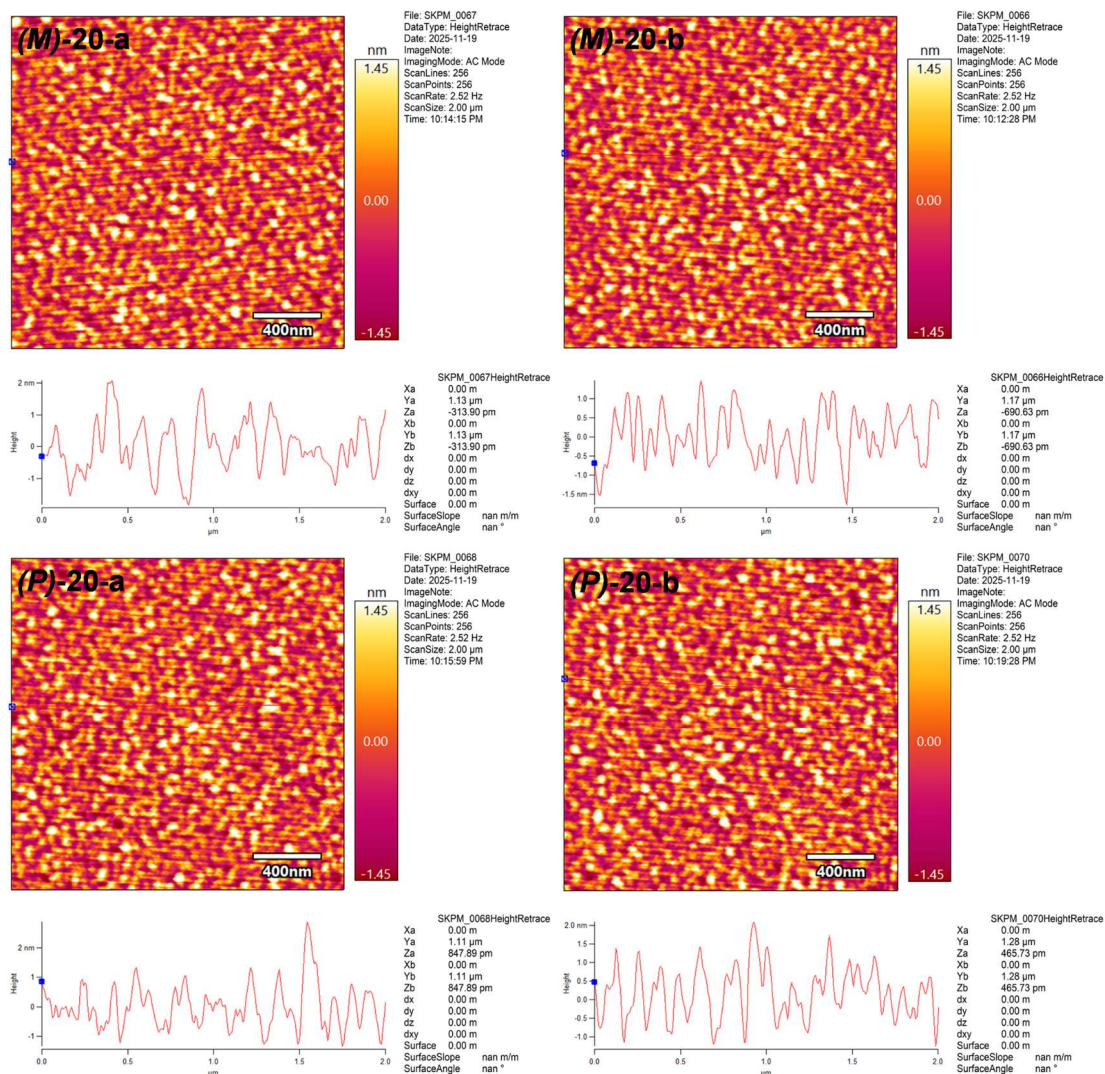

**Figure S26.** AFM studies for *(M)*-20 and *(P)*-20. Insets: AFM height profile of the red line drawn in the AFM image. Note that the scanning area is different for (a) and (b).

AFM analysis indicates that the chiral *M*-helicenes or *P*-helicenes spin-coated onto the highly oriented pyrolytic graphite (HOPG) substrates exhibited the mean thickness of  $\pm 1$  nm to  $\pm 1.5$  nm, suggesting a uniform, flat morphology.

## 10 Spin Polarization of Thin Films of Helicene Enantiomers

Magnetic conductive probe atomic force microscope (mc-AFM) measurements were performed using Oxford MFP-3D Origin. The thin films of chiral helicenes were prepared on freshly cleaved HOPG substrates by spin-coating the helicene solution (10  $\mu\text{M}$ ). Current-voltage measurements ( $I$ - $V$ ) were recorded by performing voltage bias with the tip in contact with the surface of the film. The tests were carried out by a Co-Cr-coated AFM tips (MEPS-V2, Bruker, nominal tip radius of 12 nm with spring constant of  $\sim 3$  N/m). Spin selective tests were performed by pre-magnetizing the AFM tips using a magnet (0.5 T) on up and down magnetization directions, in which tip+ means the field-up with respect to the substrate, while tip- means the field-down with respect to the substrate. When the testing time was over 1 h, the tip was re-magnetized. The  $I$ - $V$  curves were measured across the bias from -2.0 V to +2.0 V, with a frequency of 0.5 Hz. In a similar way, the  $I$ - $V$  curves of other helicenes were also recorded. For these helicenes, the  $I$ - $V$  spectra refer to the measurements of longitudinal CISS effect, where spin selectivity occurs for electrons injected parallel to the helix axis.<sup>3-5</sup>

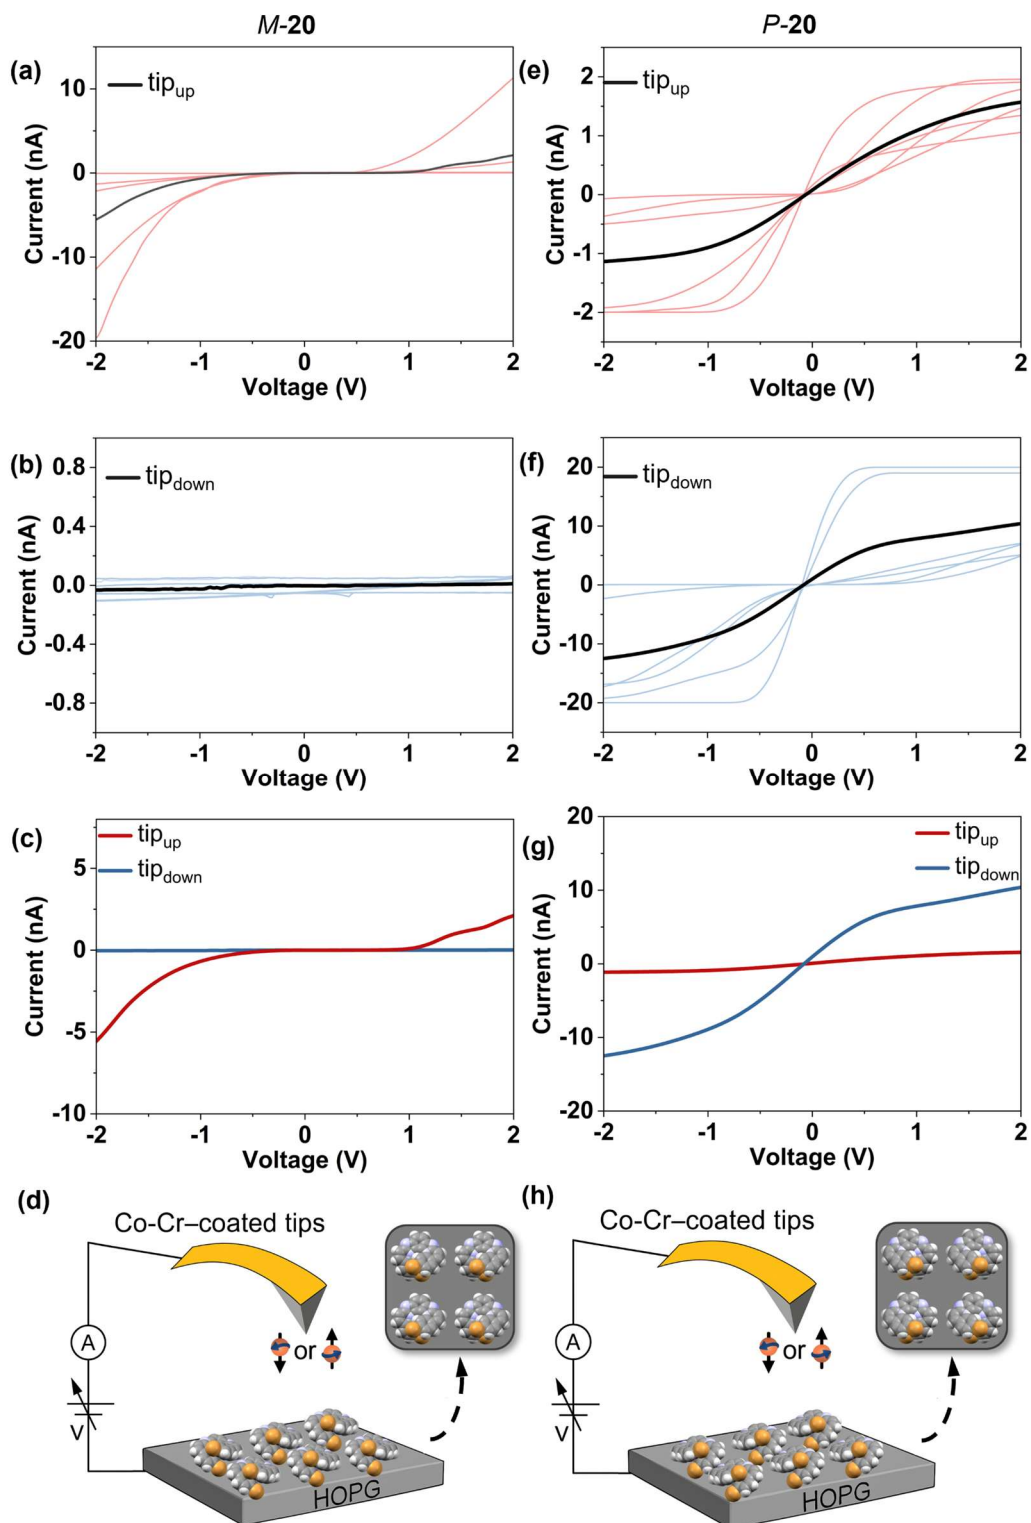

**Figure S27.** Spin-dependent conduction through the helicene *M-20* (a–d) and *P-20* (e–h) thin films. Each line (red and blue) represents one measurement, and the solid black lines represent the average of  $I$ - $V$  curves. Note the ordinate scales are different in the individual figures to suit each  $I$ - $V$  curves.

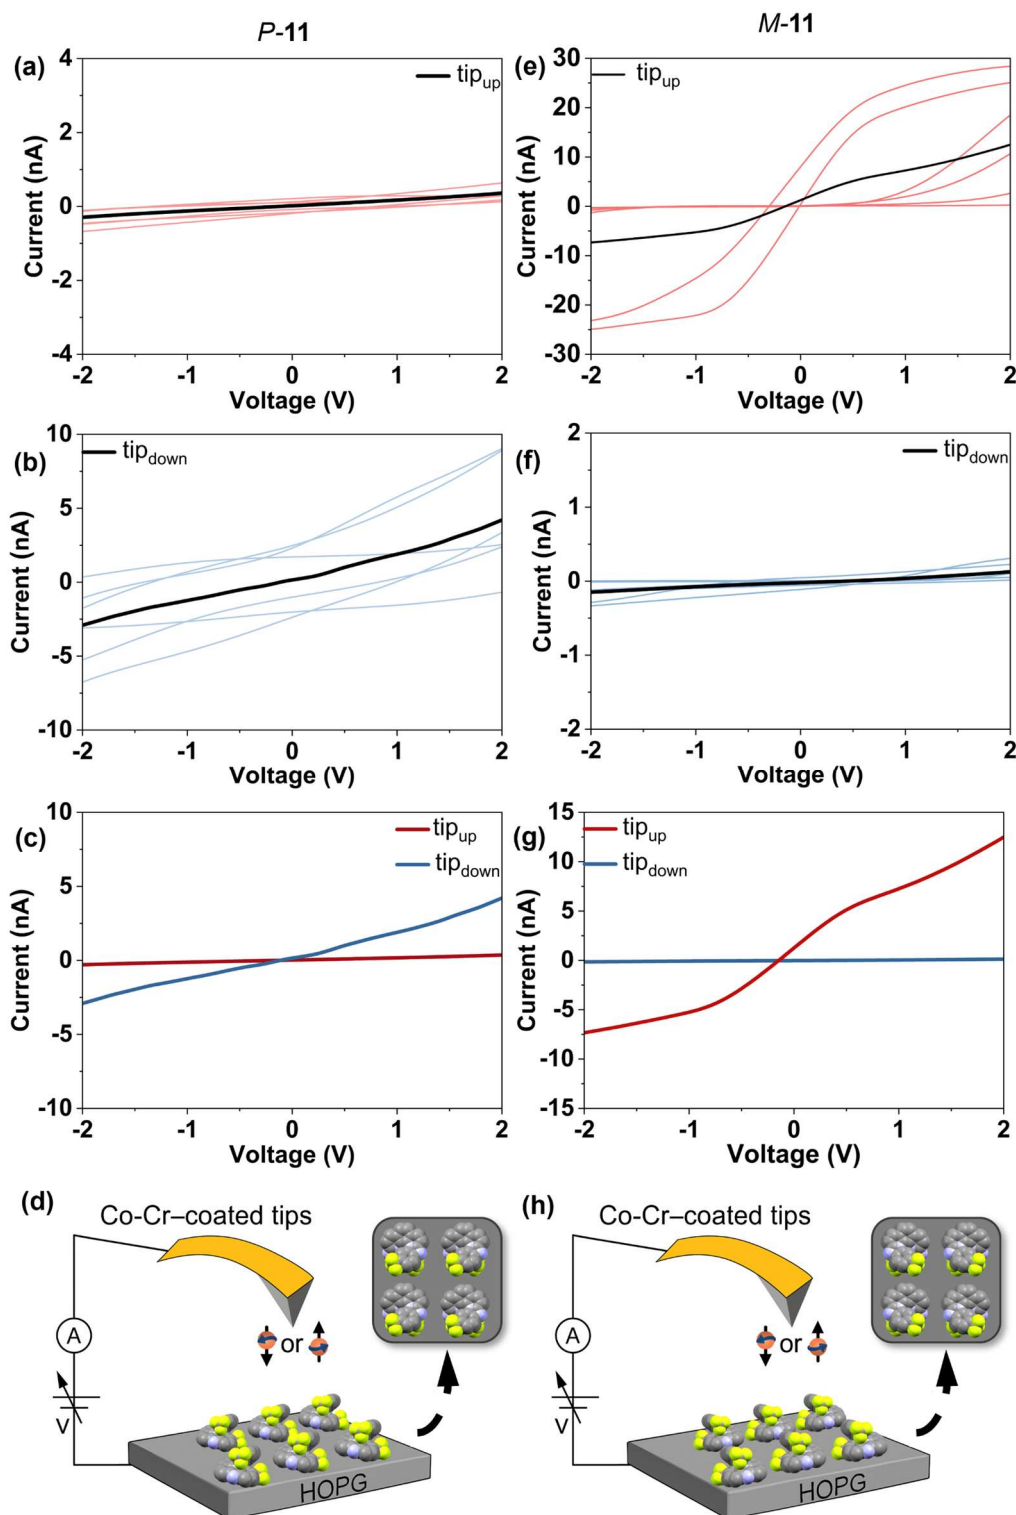

**Figure S28.** Spin-dependent conduction through the helicene *P*-11 (a–d) and *M*-11 (e–h) thin films. Each line (red and blue) represents one measurement, and the solid black lines represent the average of  $I$ - $V$  curves. Note the ordinate scales are different in the individual figures to suit each  $I$ - $V$  curves.

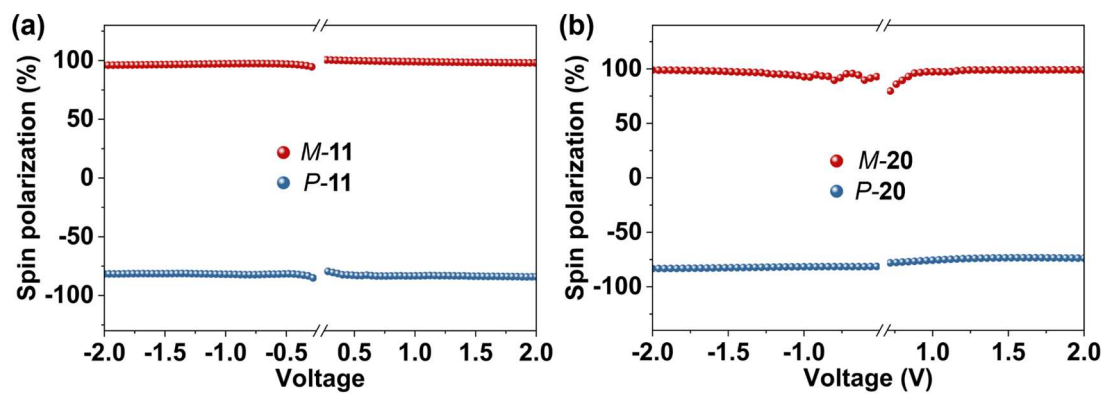

**Figure S29.** Spin polarization as a function of applied bias for *P-11* (blue) and *M-11* (red) samples (a) and for *P-20* (blue) and *M-20* (red) samples (b).

**Table S16.** Comparison of the comprehensive spin-selective properties of various categories of chiral systems.

| No.              | Categories                | SP (%) | Spin current (nA) |
|------------------|---------------------------|--------|-------------------|
| 1 <sup>6</sup>   | Molecular motors-1        | 25–60  | 150               |
| 2 <sup>7</sup>   | Molecular motors-2        | 44     | < 0.15            |
| 3 <sup>8</sup>   | Molecular motors-3        | 14–96  | 3                 |
| 4 <sup>9</sup>   | Molecular wires-1         | 32     | < 1.0             |
| 5 <sup>10</sup>  | Molecular wires-2         | 50     | 2.4               |
| 6 <sup>11</sup>  | Helicenes-1               | 26     | 2                 |
| 7 <sup>12</sup>  | Helicenes-2               | 60     | 2                 |
| 8 <sup>13</sup>  | Helicenes-3               | 80     | 20                |
| 9 <sup>3</sup>   | Helicenes-4               | 80     | 1.2               |
| 10 <sup>14</sup> | Helicenes-5               | 60     | 2                 |
| 11 <sup>15</sup> | Helicenes-6               | 50     | 0.6               |
| 12 <sup>16</sup> | Helicenes-7               | 49     | 1                 |
| 13 <sup>17</sup> | Helicenes-8               | 40     | 4                 |
| 14 <sup>18</sup> | Chiral polymers-1         | 56     | 2.2               |
| 15 <sup>19</sup> | Chiral polymers-2         | 52     | < 0.1             |
| 16 <sup>20</sup> | Chiral polymers-3         | 70     | 45                |
| 17 <sup>21</sup> | Supramolecular polymers-1 | 65     | 1.5               |
| 18 <sup>22</sup> | Supramolecular polymers-2 | 50     | < 4.0             |
| 19 <sup>23</sup> | Supramolecular polymers-3 | 90     | 0.5               |
| 20 <sup>24</sup> | Hybrid perovskites-1      | 94     | 7                 |
| 21 <sup>25</sup> | Hybrid perovskites-2      | 80     | 10                |
| 22 <sup>26</sup> | Hybrid perovskites-3      | 78     | 60                |
| 23 <sup>27</sup> | Chiral MOF-1              | 96.9   | 3000              |
| 24 <sup>28</sup> | Chiral MOF-2              | 94     | 2                 |

**Table S16 (continue).** Comparison of the comprehensive spin-selective properties of various categories of chiral systems.

| No.              | Categories                                    | SP (%)    | Spin current (nA) |
|------------------|-----------------------------------------------|-----------|-------------------|
| 25 <sup>29</sup> | Chiral MOF-3                                  | 42        | 0.6               |
| 26 <sup>30</sup> | Chiral COF-1                                  | 83        | 2                 |
| 27 <sup>31</sup> | Chiral COF-2                                  | 90        | < 20              |
| 28 <sup>32</sup> | Chiral COF-3                                  | 72        | 15                |
| 29 <sup>4</sup>  | Molecular knots-1                             | 88        | 400               |
| 30 <sup>33</sup> | Molecular knots-2                             | > 60      | -                 |
| 31 <sup>34</sup> | Quantum dots                                  | 30        | 1                 |
| 32 <sup>35</sup> | Oligopeptide/DNA                              | 60        | 3                 |
| 33 <sup>36</sup> | Subphthalocyanines                            | 50        | 2                 |
| 34 <sup>37</sup> | MoS2                                          | 75        | 0.6               |
| 35 <sup>5</sup>  | Chiral organic cages                          | 90        | 150               |
| 36 <sup>5</sup>  | Cage-based helical supramolecular nanofibrils | 82        | 330               |
| 37               | Helicene <b>11</b> (This work)                | <b>94</b> | <b>20</b>         |
| 38               | Helicene <b>20</b> (This work)                | <b>87</b> | <b>20</b>         |

## 11 NMR Spectra

*N*-(4-methoxyphenyl)-1,10-phenanthrolin-2-amine (**1a**):  $^1\text{H}$  NMR (400 MHz,  $\text{DMSO-}d_6$ )

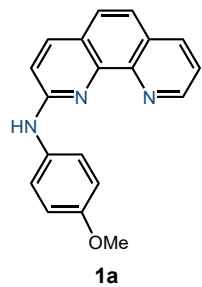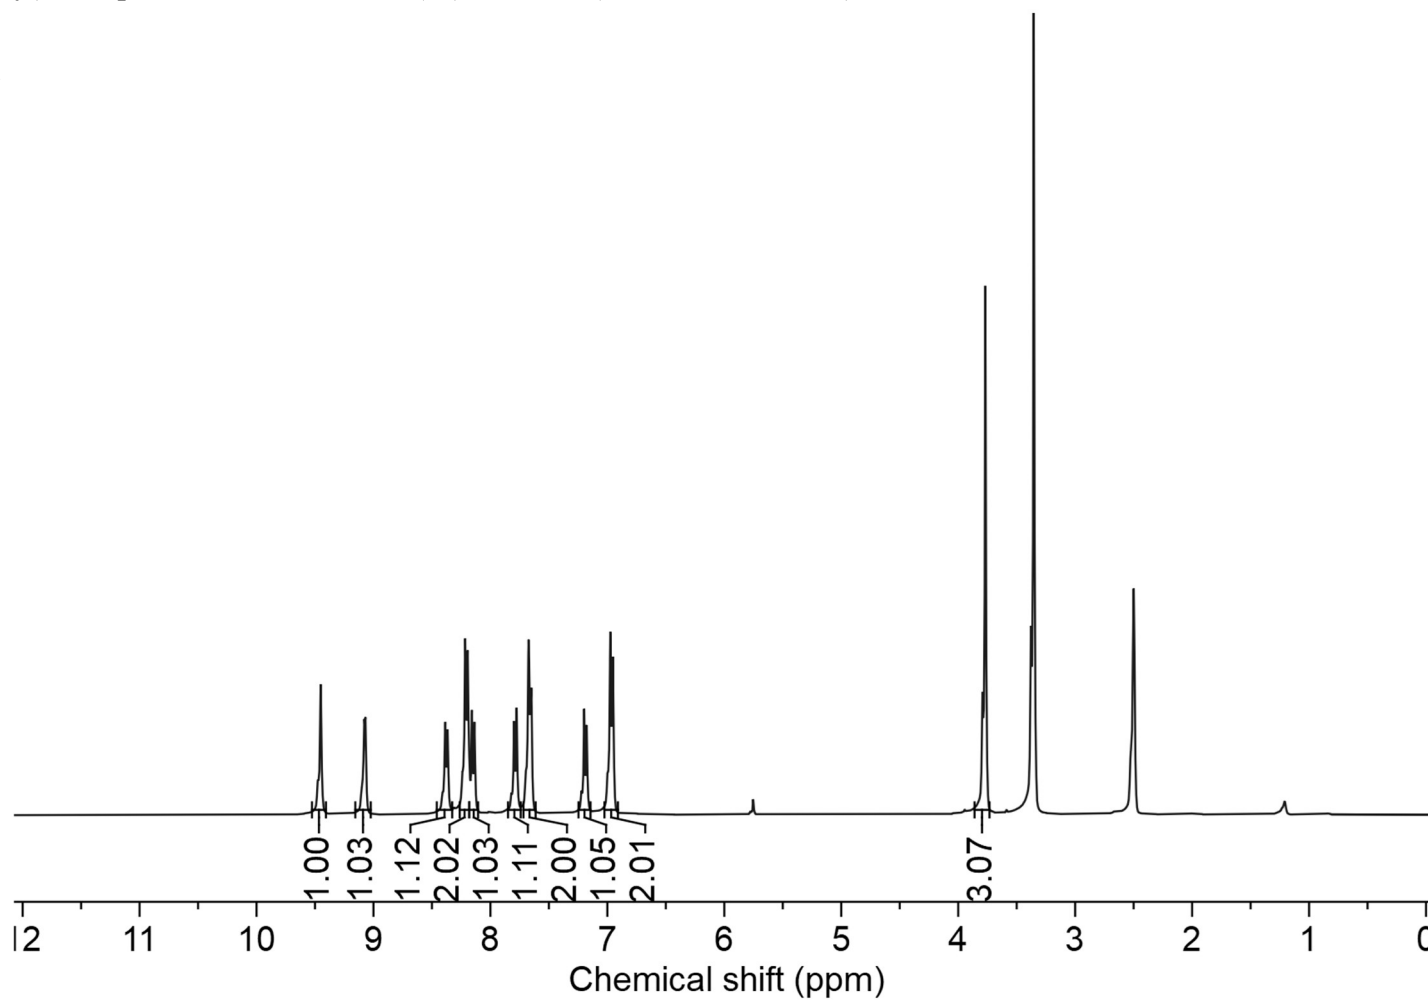

$^{13}\text{C}$  NMR (100 MHz, DMSO- $d_6$ )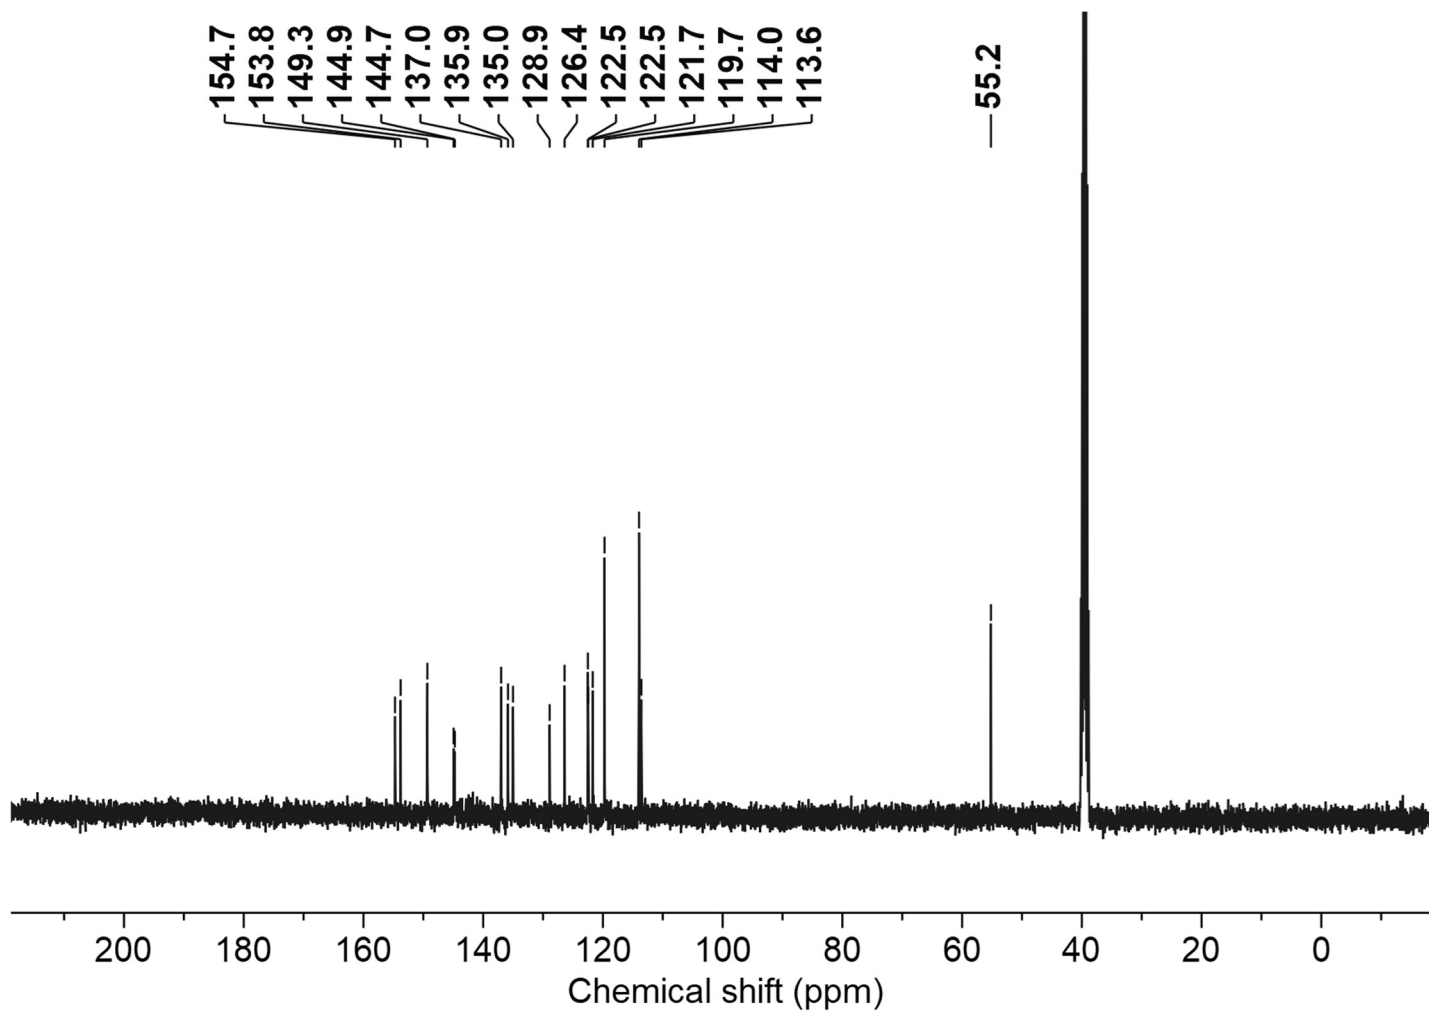

**4-((1,10-phenanthrolin-2-yl)amino)benzonitrile (2a):**  $^1\text{H}$  NMR (400 MHz,  $\text{DMSO-}d_6$ )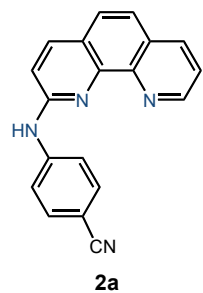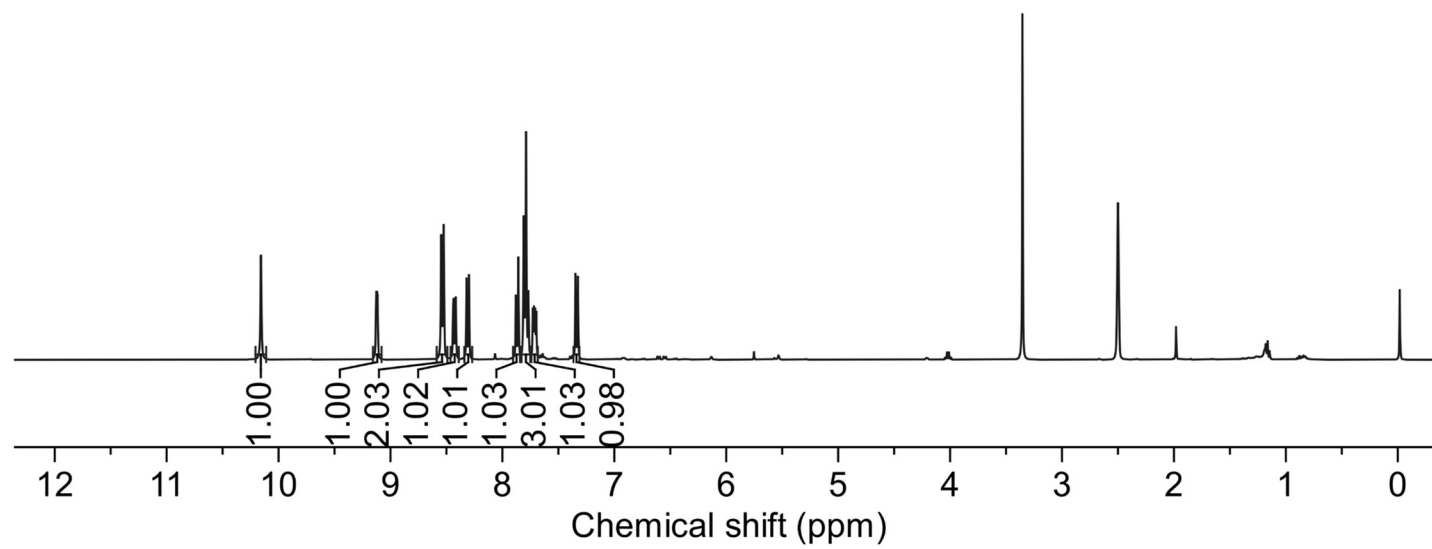

$^{13}\text{C}$  NMR (100 MHz,  $\text{DMSO-}d_6$ )

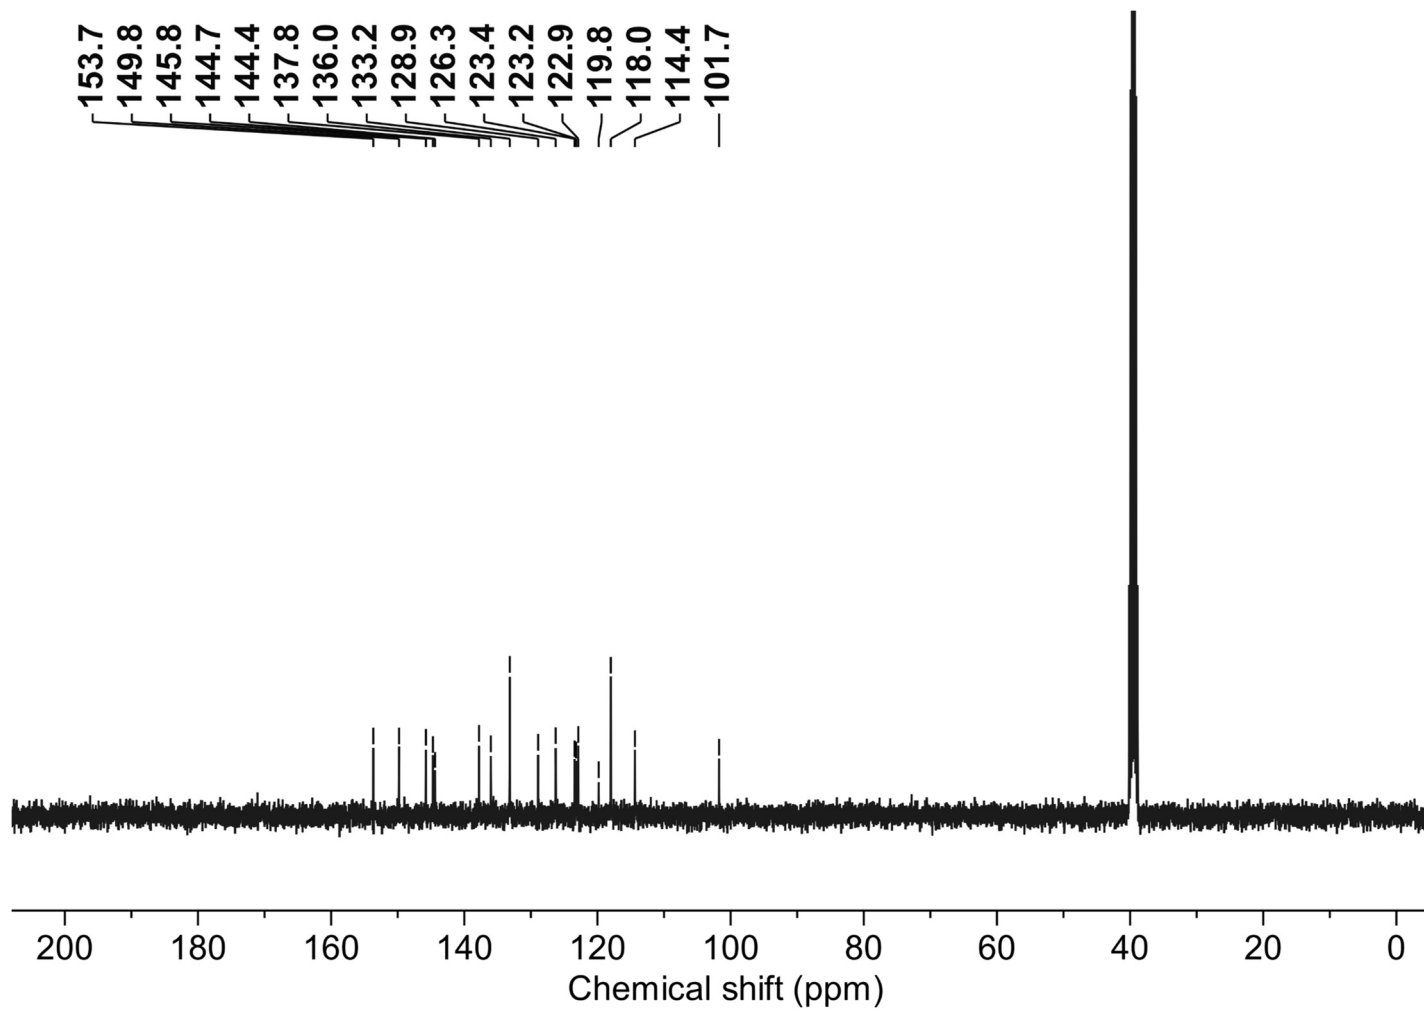

***N***-(quinolin-8-yl)-1,10-phenanthrolin-2-amine (**3a**):  $^1\text{H}$  NMR (400 MHz,  $\text{CDCl}_3$ )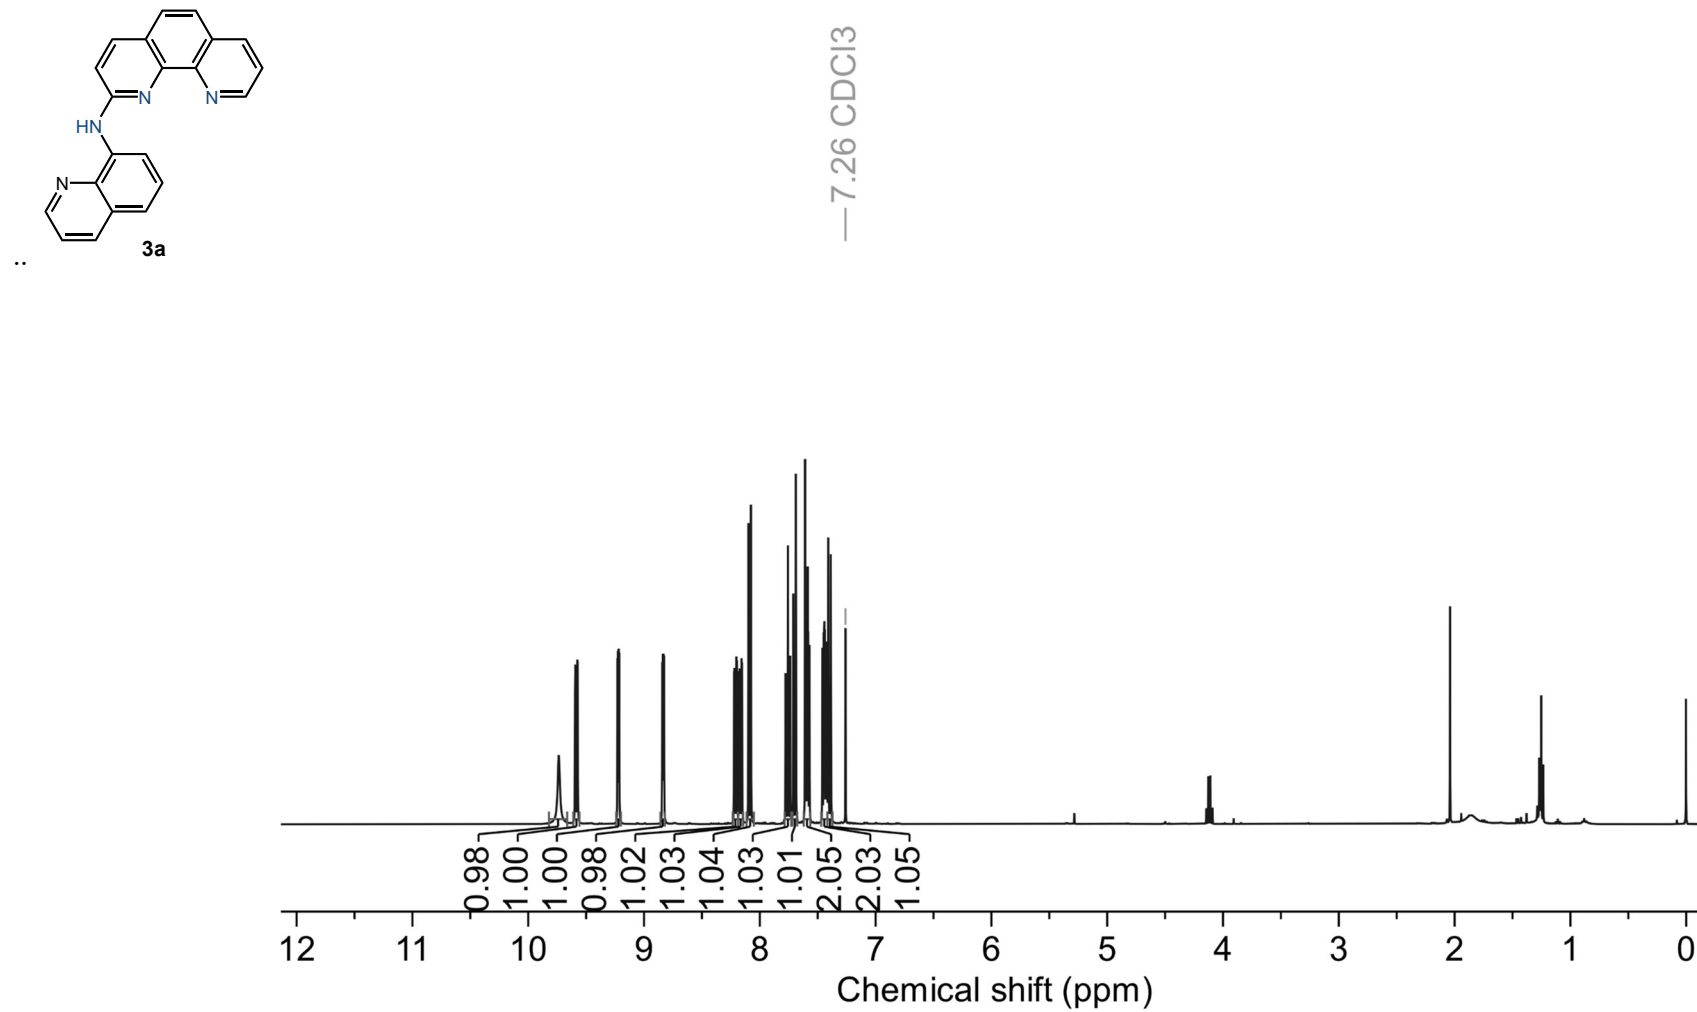

$^{13}\text{C}$  NMR (100 MHz,  $\text{CDCl}_3$ )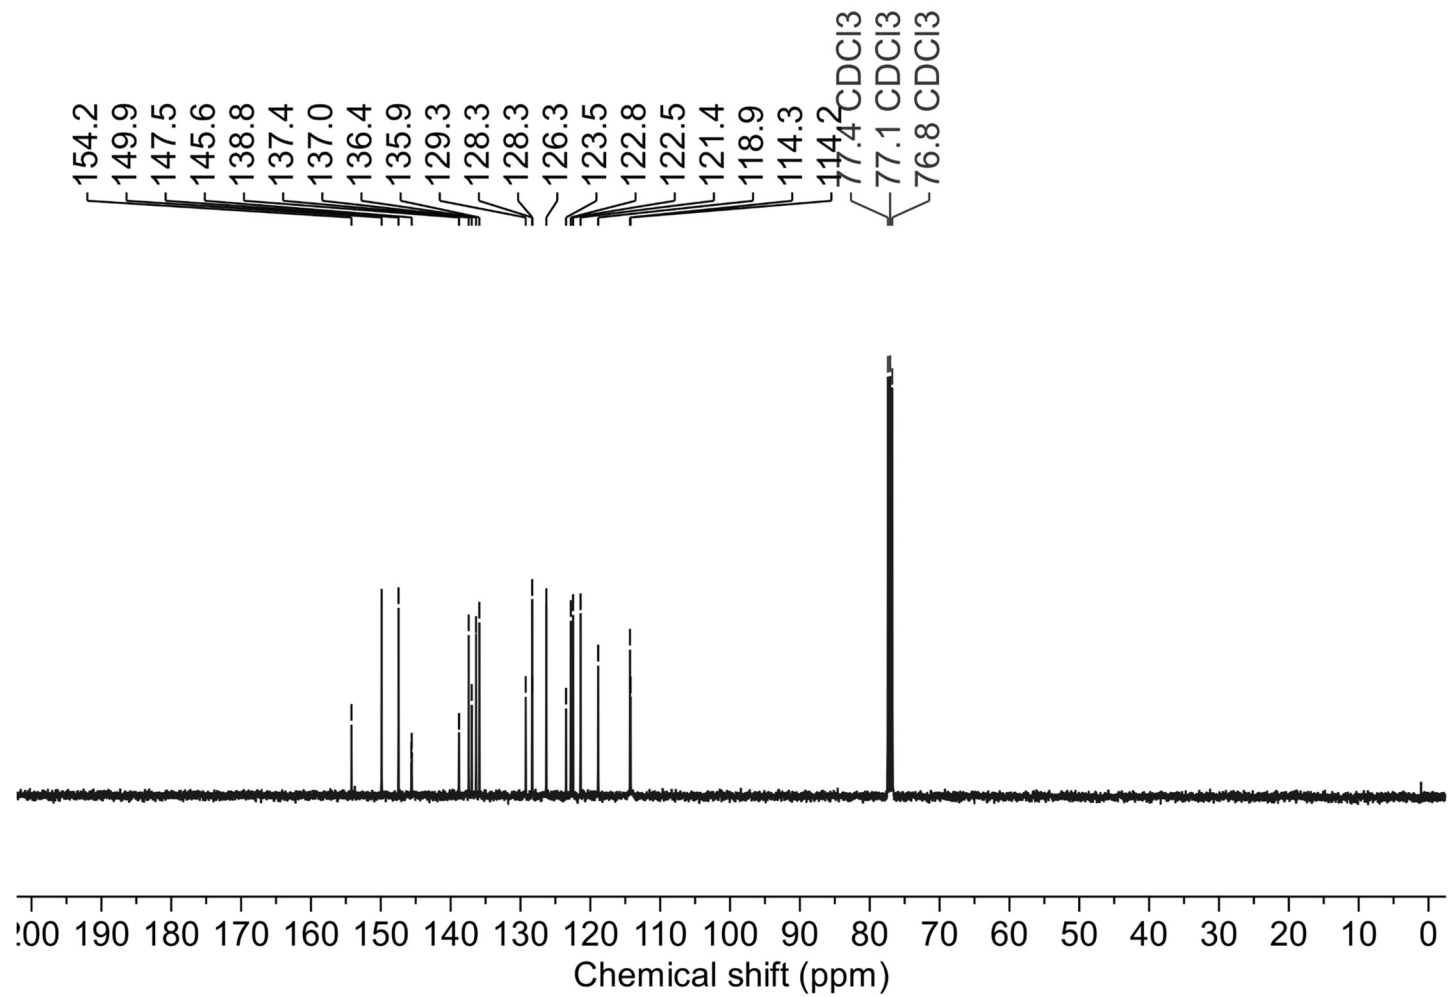

*N*<sup>2</sup>,*N*<sup>9</sup>-diphenyl-1,10-phenanthroline-2,9-diamine (**4a**): <sup>1</sup>H NMR (400 MHz, CDCl<sub>3</sub>)

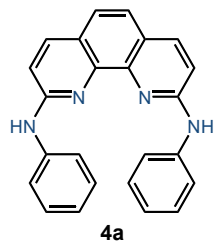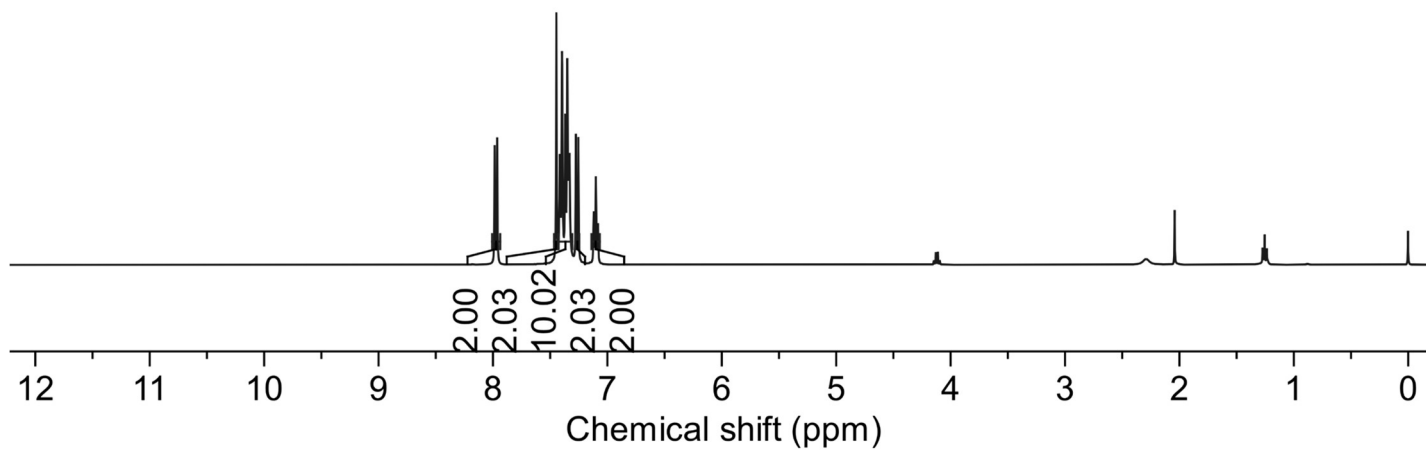

$^{13}\text{C}$  NMR (100 MHz,  $\text{CDCl}_3$ )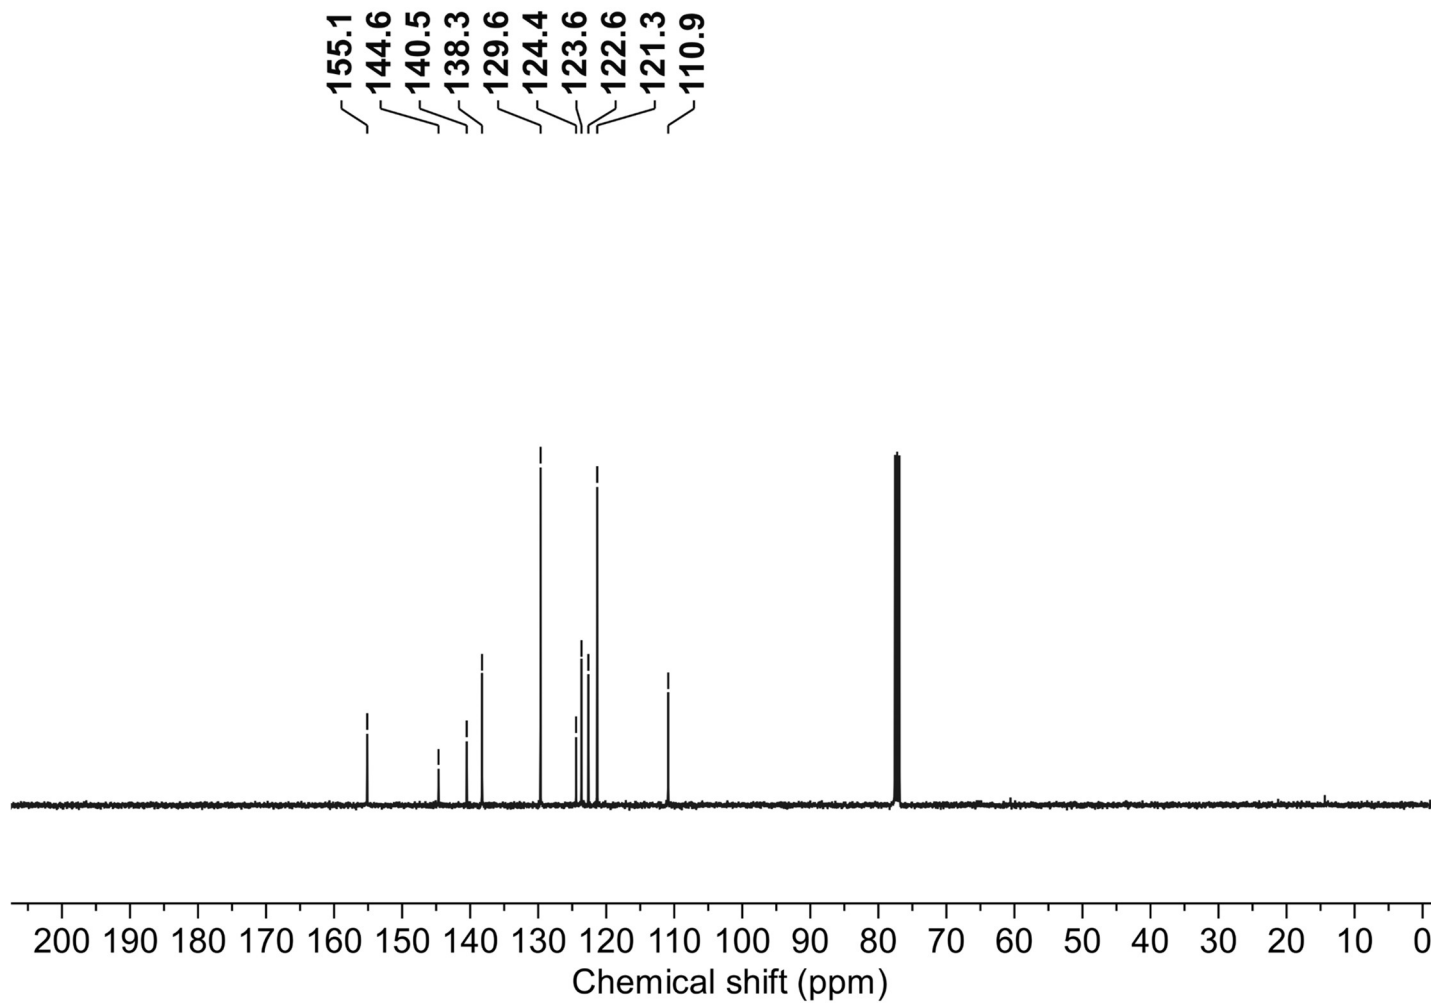

*N*<sup>2</sup>,*N*<sup>9</sup>-bis(4-methoxyphenyl)-1,10-phenanthroline-2,9-diamine (**5a**): <sup>1</sup>H NMR (400 MHz, CDCl<sub>3</sub>)

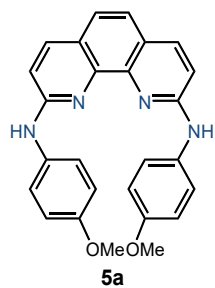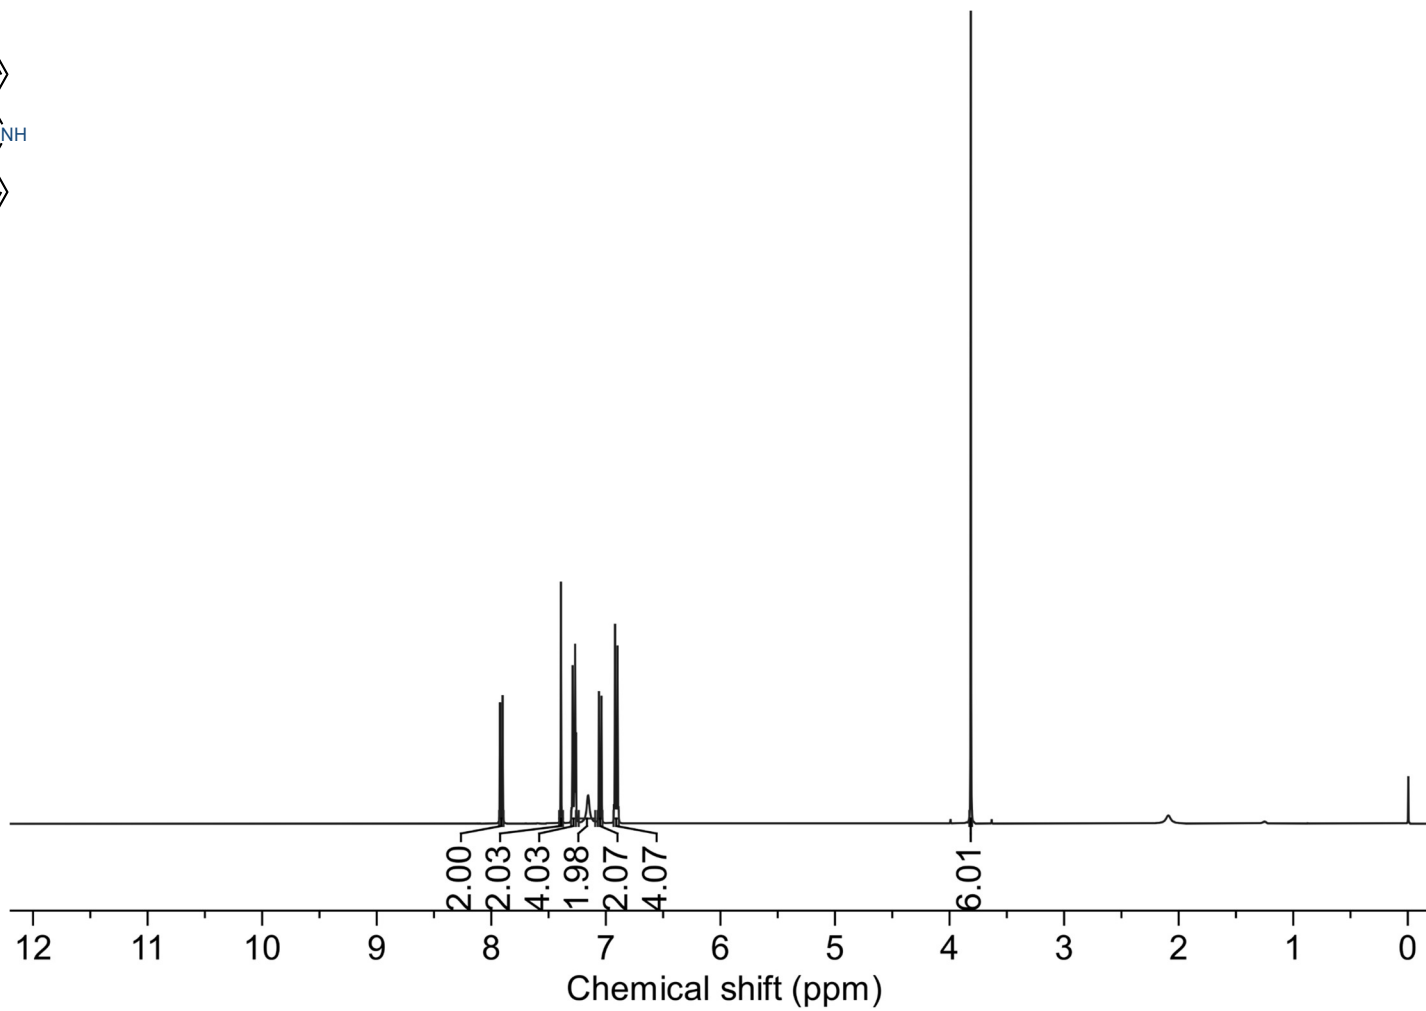

$^{13}\text{C}$  NMR (100 MHz,  $\text{CDCl}_3$ )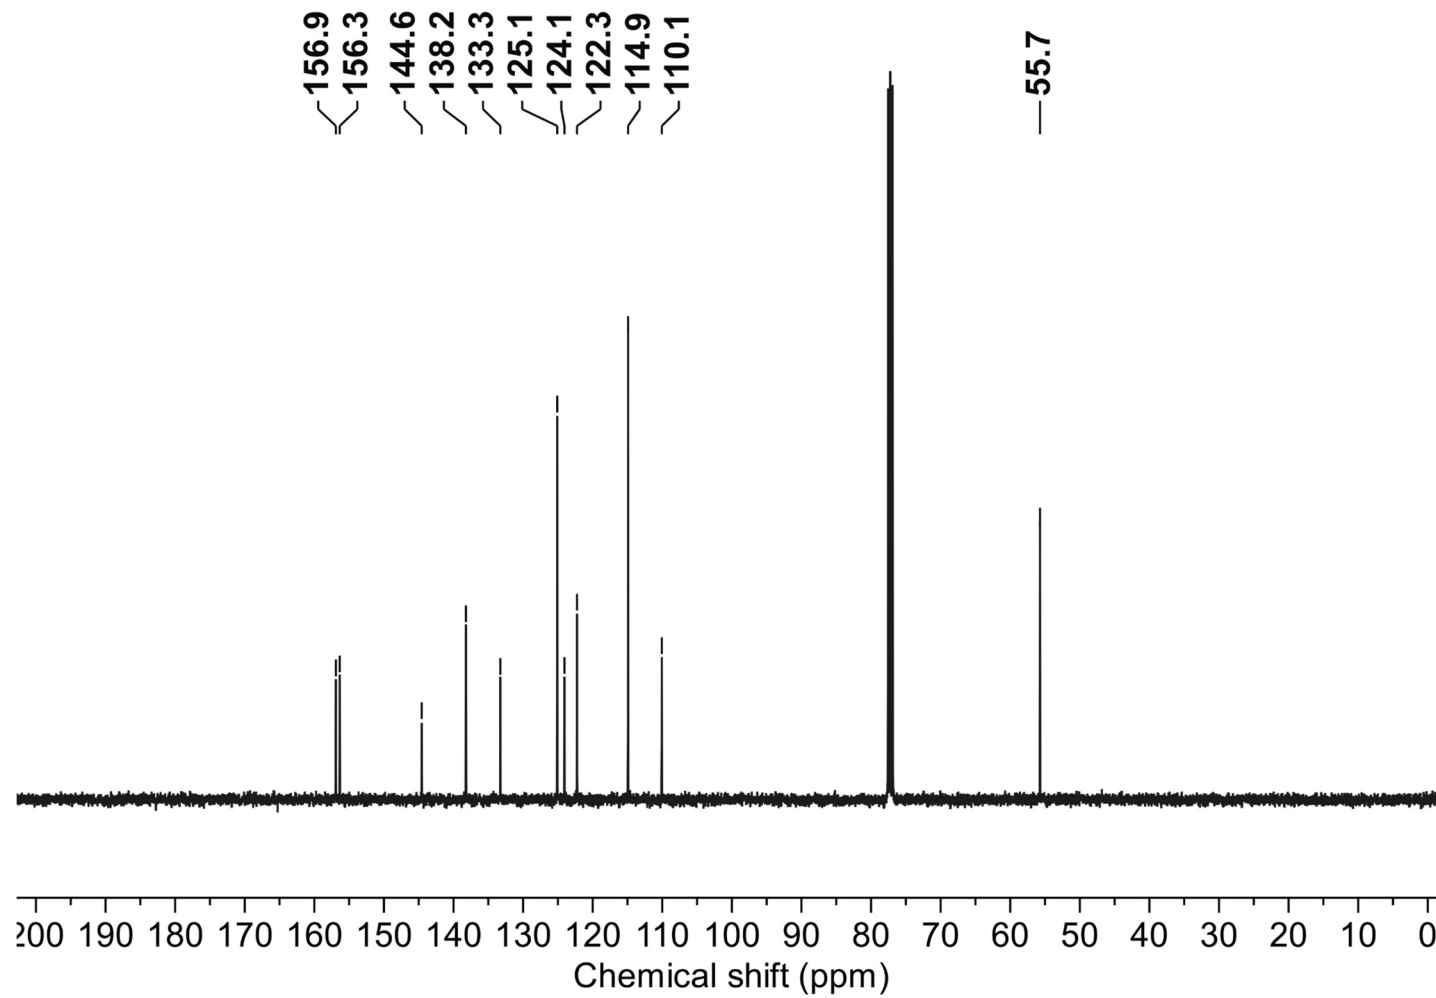

*N*<sup>2</sup>,*N*<sup>9</sup>-bis(4-(cyclopentyloxy)phenyl)-1,10-phenanthroline-2,9-diamine (**6a**): <sup>1</sup>H NMR (400 MHz, CDCl<sub>3</sub>)

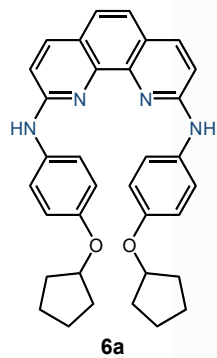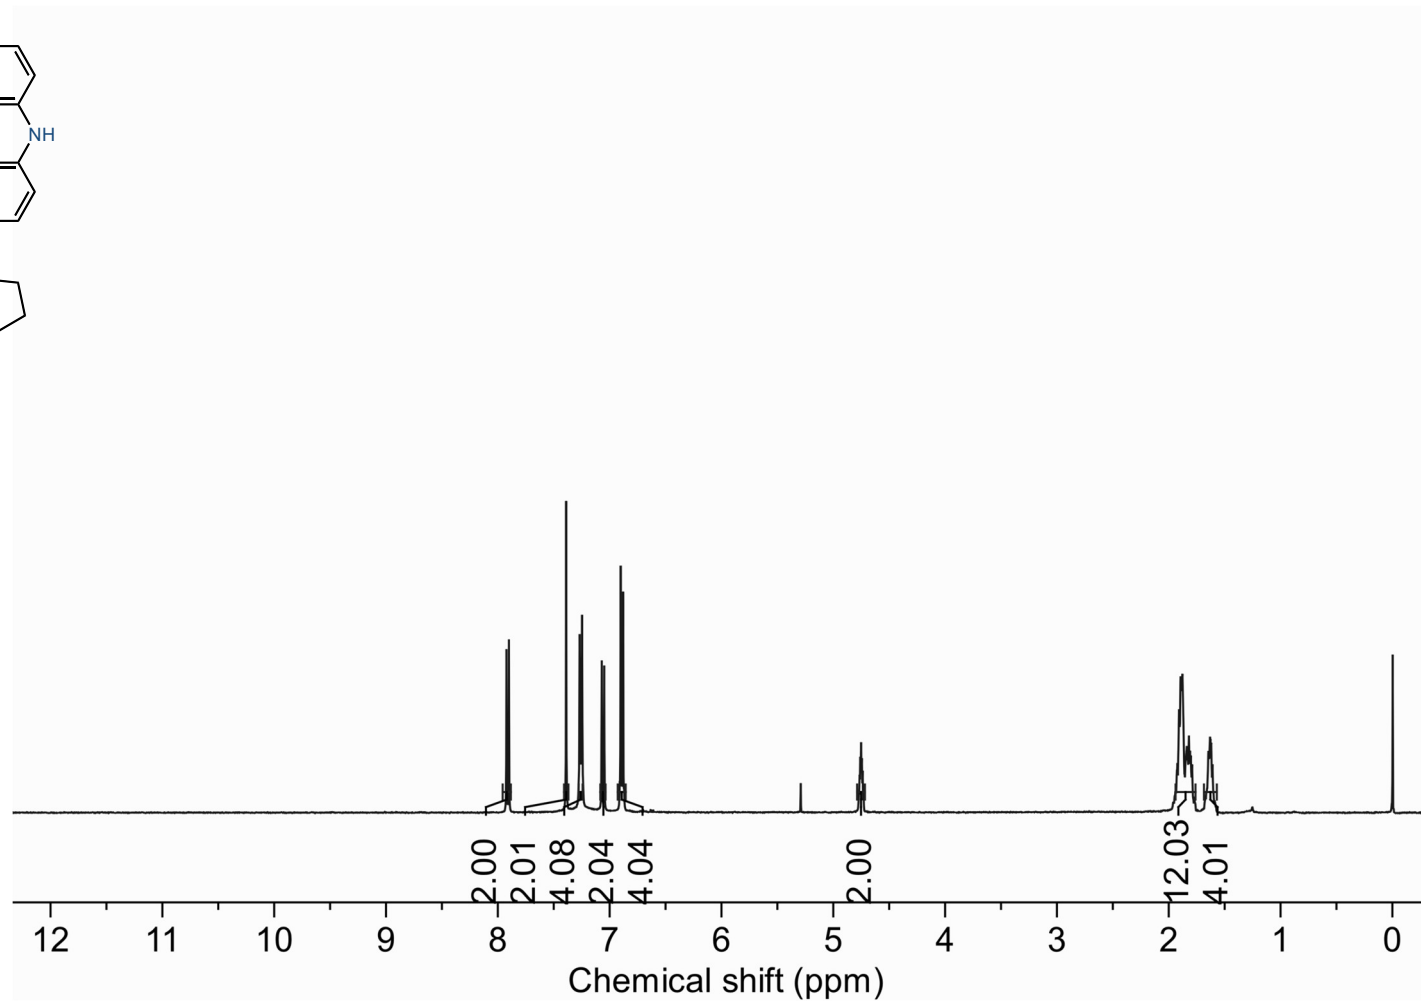

$^{13}\text{C}$  NMR (100 MHz,  $\text{CDCl}_3$ )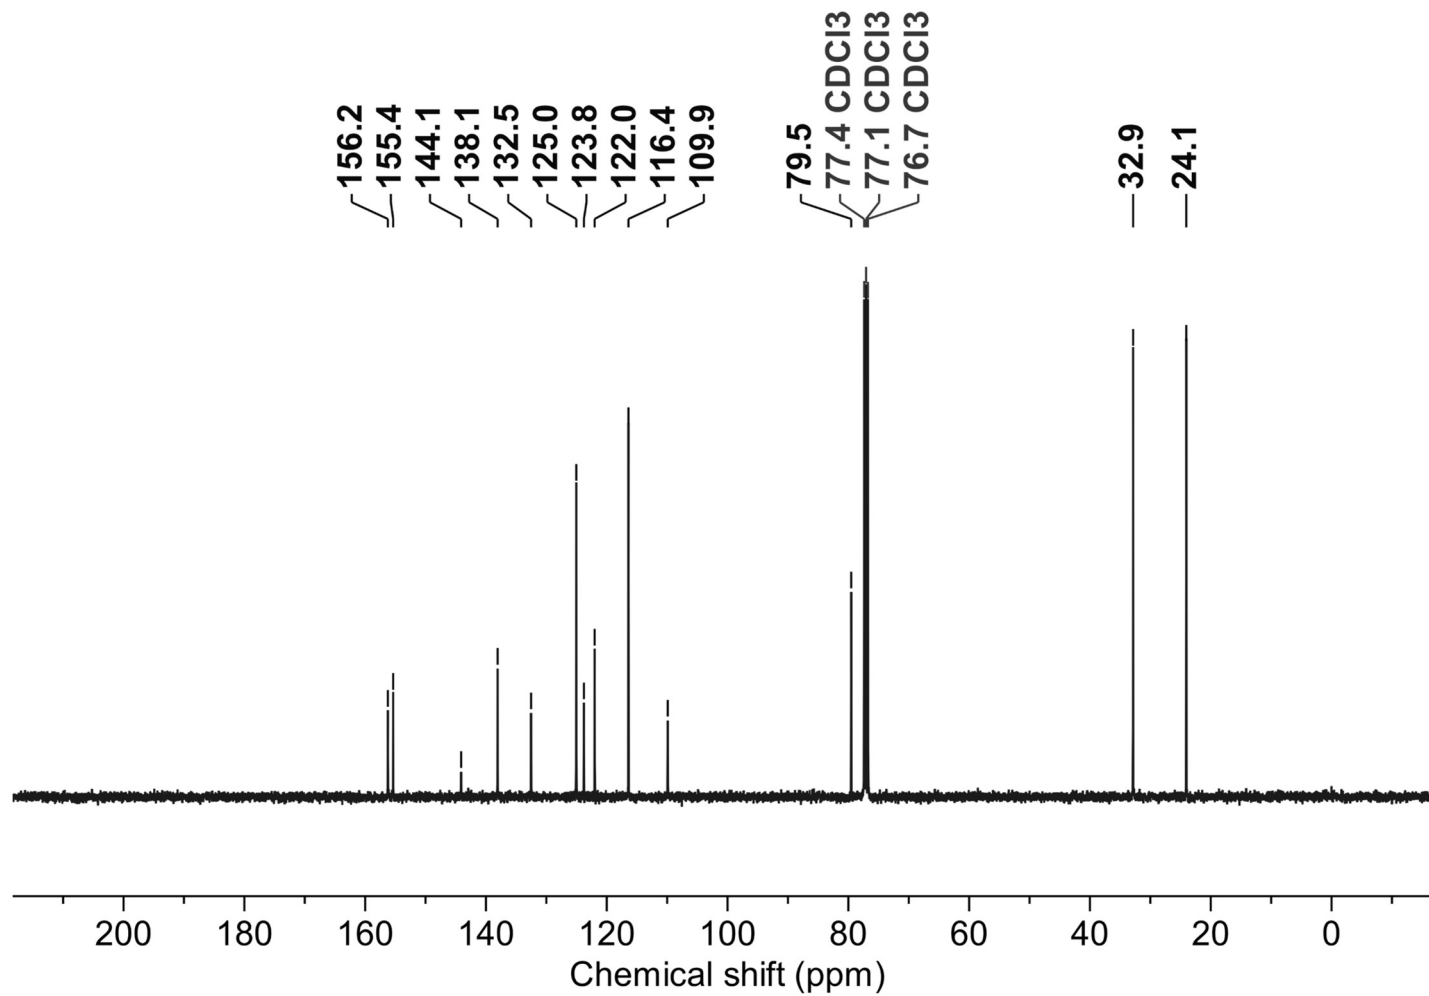

*N*<sup>2</sup>,*N*<sup>9</sup>-bis(4-(*tert*-butyl)phenyl)-1,10-phenanthroline-2,9-diamine (**7a**): <sup>1</sup>H NMR (400 MHz, CDCl<sub>3</sub>)

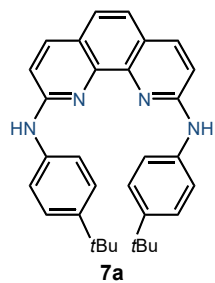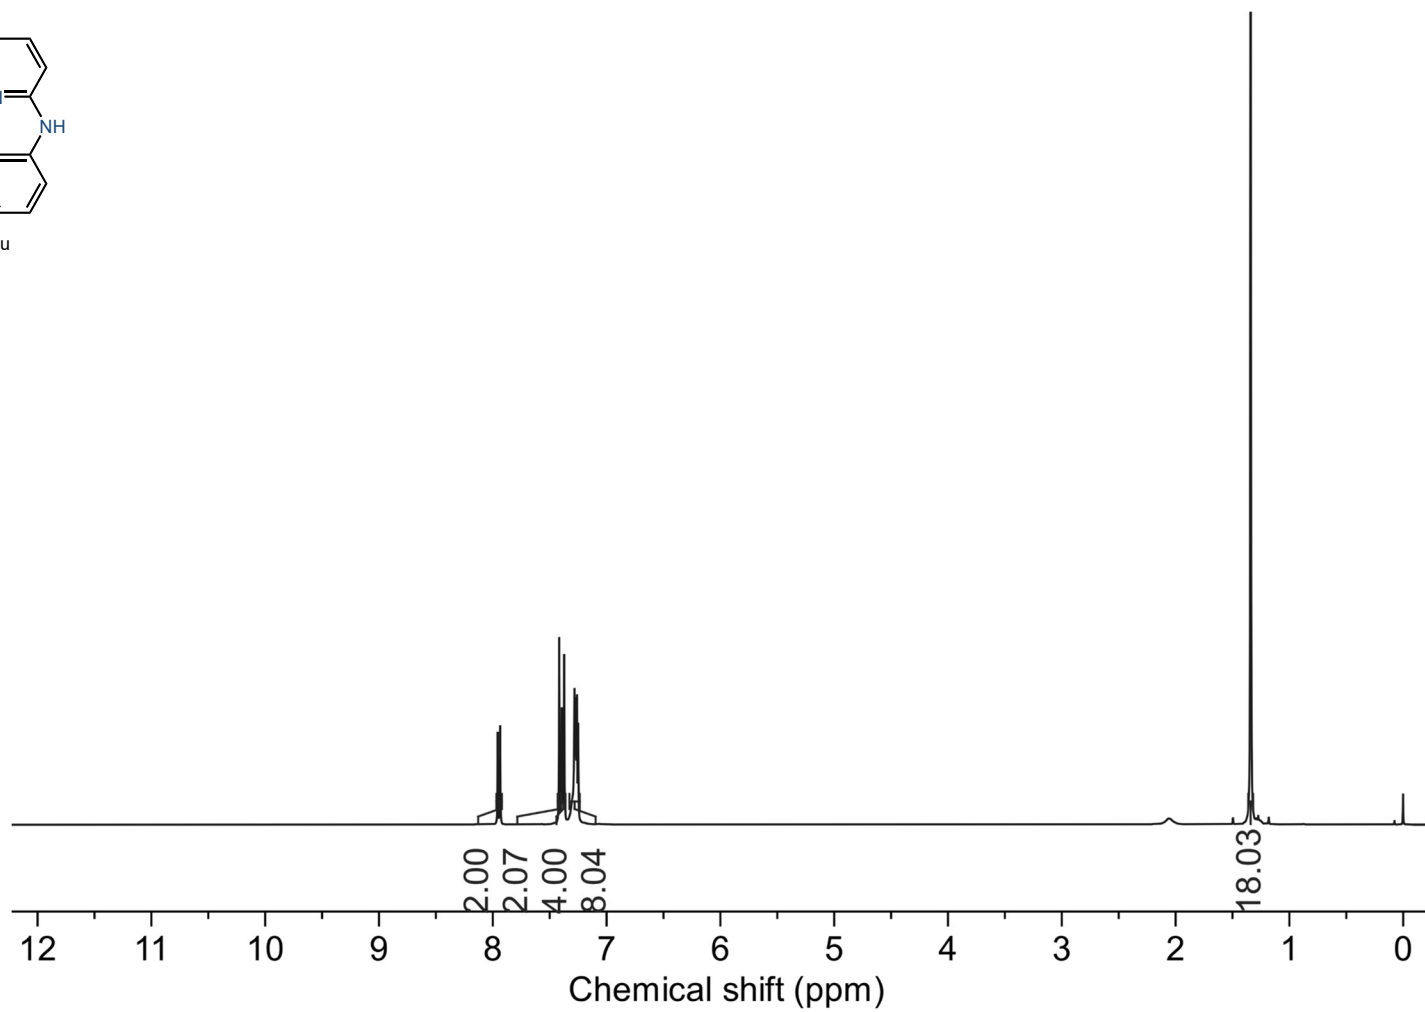

$^{13}\text{C}$  NMR (100 MHz,  $\text{CDCl}_3$ )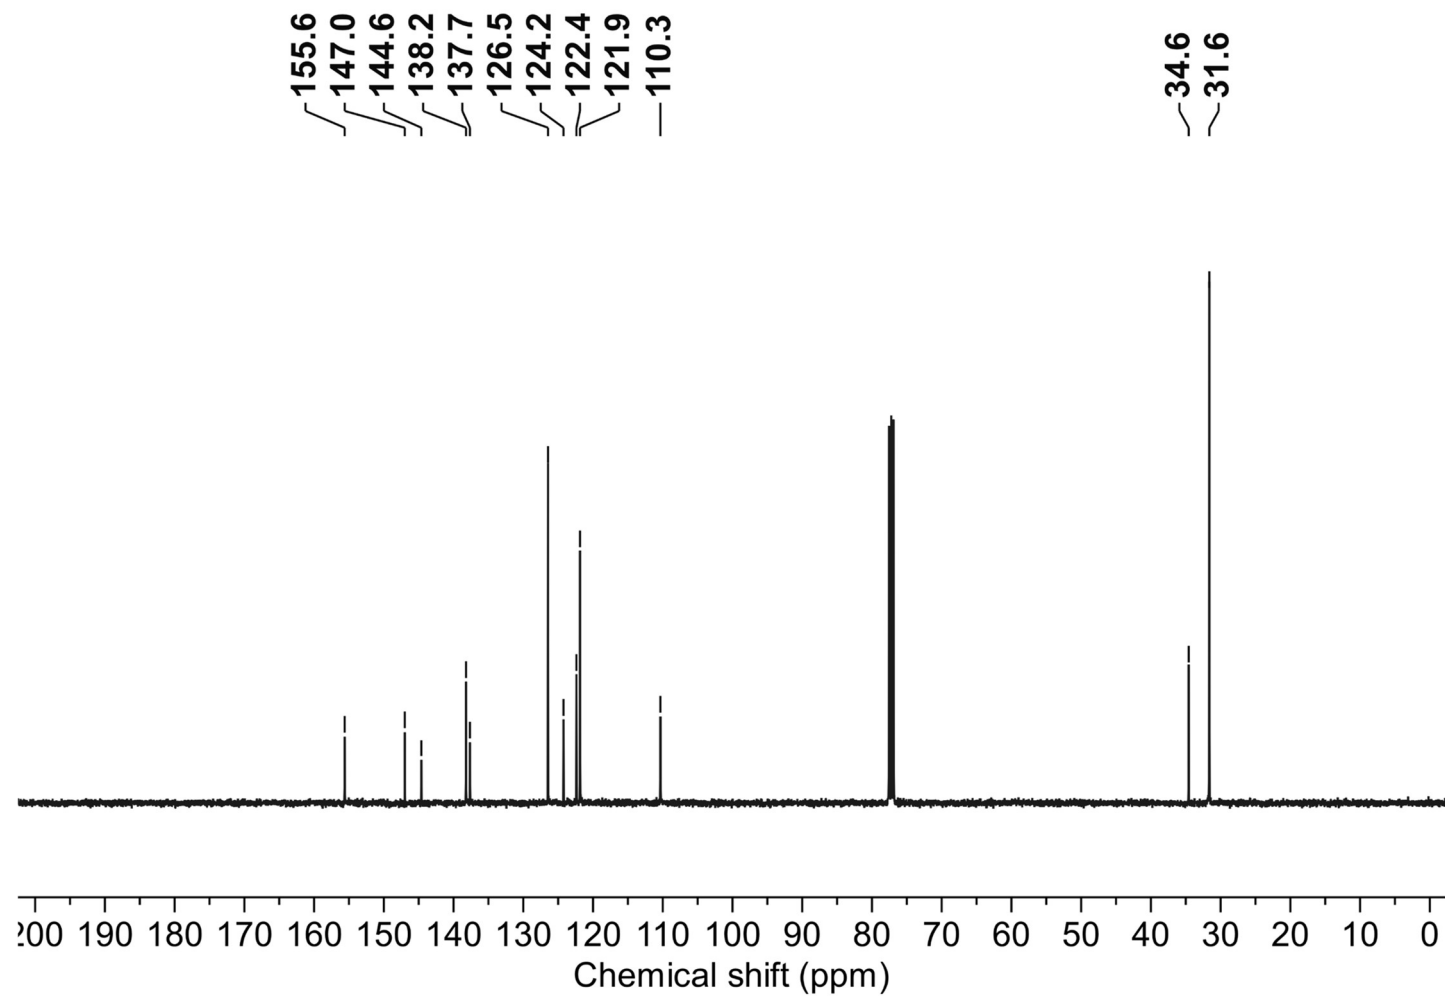

$N^2,N^9$ -di([1,1'-biphenyl]-4-yl)-1,10-phenanthroline-2,9-diamine (**8a**):  $^1\text{H}$  NMR (800 MHz,  $\text{CDCl}_3$ )

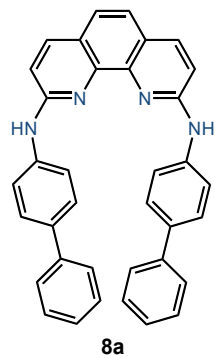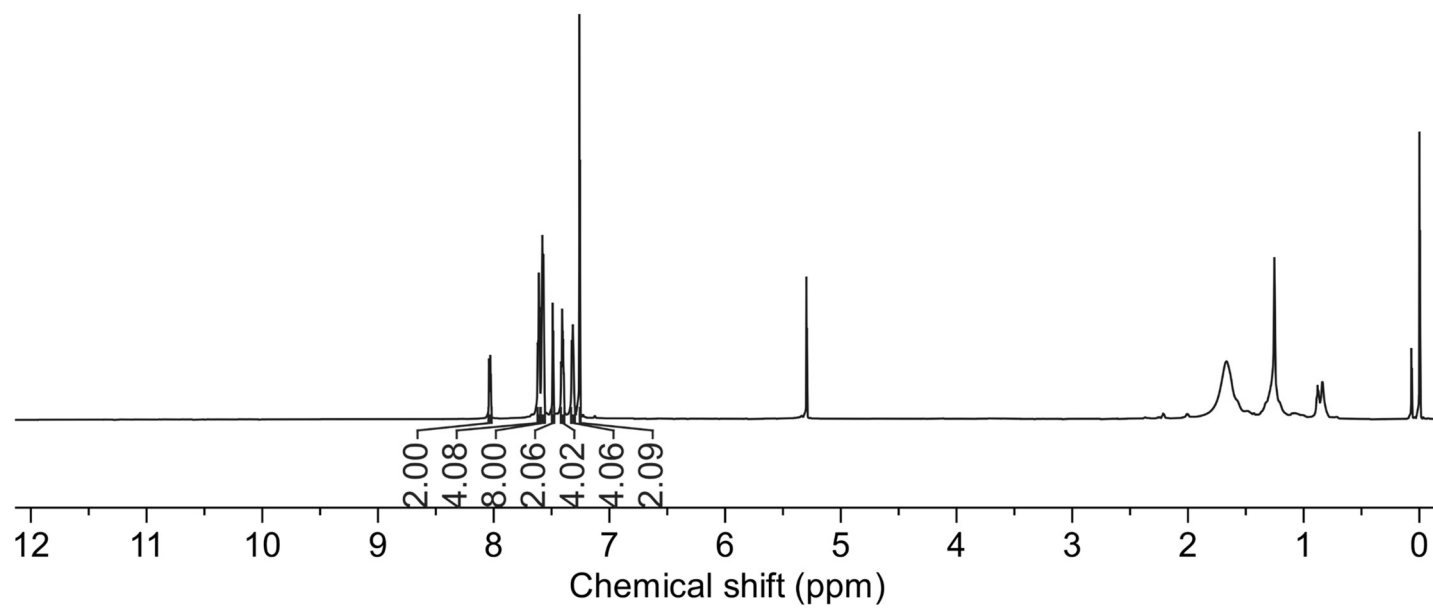

$^{13}\text{C}$  NMR (200 MHz,  $\text{CDCl}_3$ )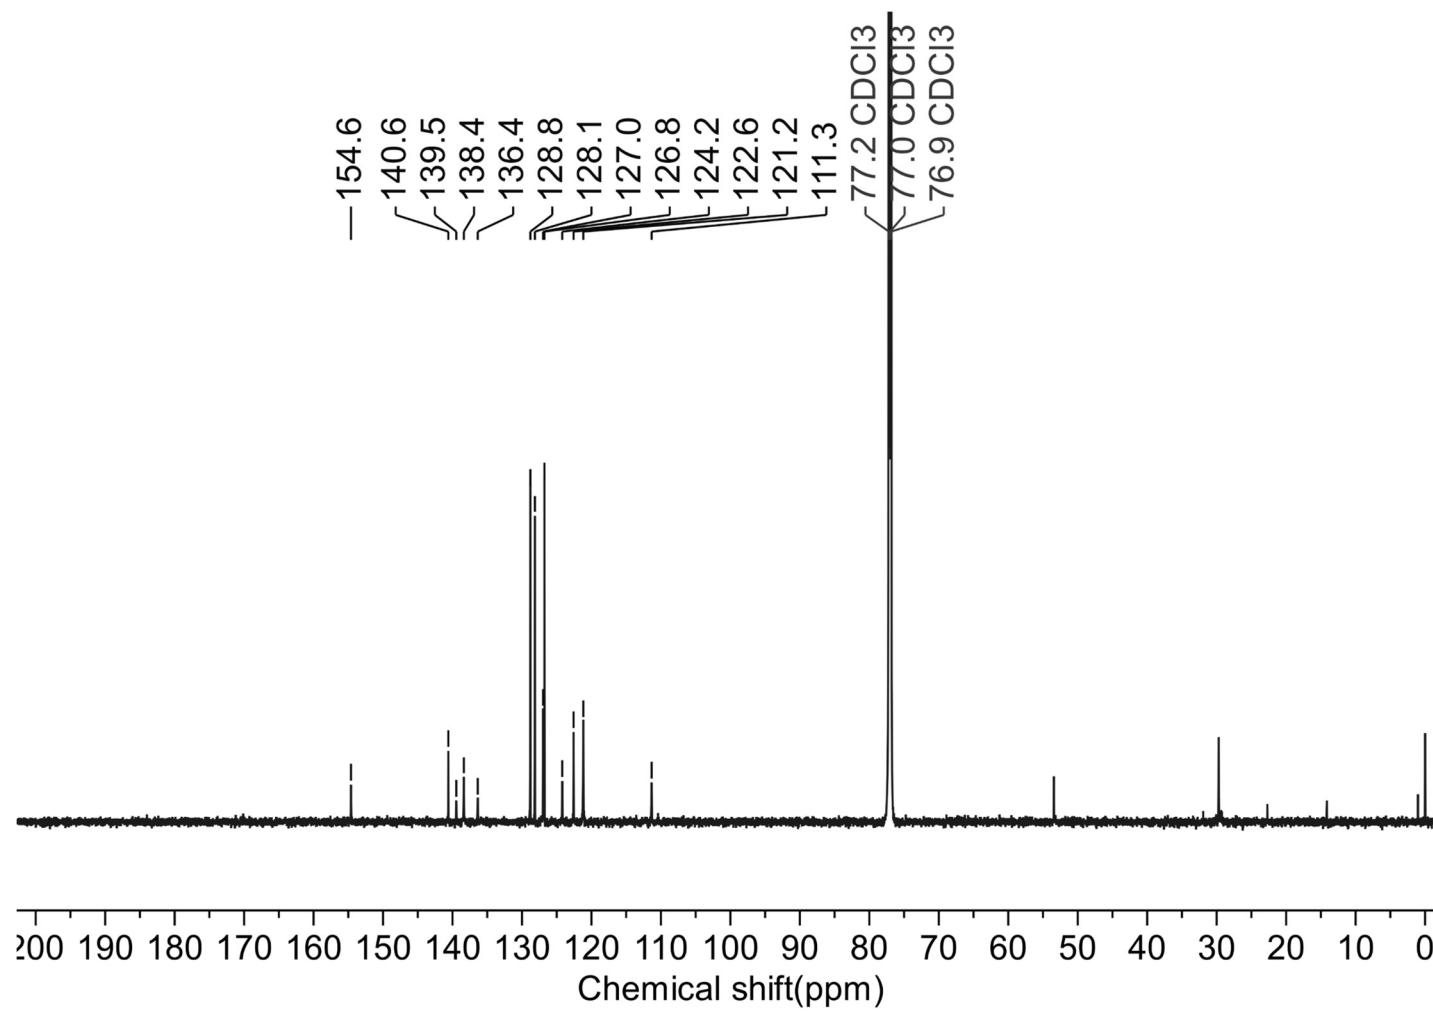

Dimethyl 4,4'-((1,10-phenanthroline-2,9-diyl)bis(azanediyl)dibenzoate (**9a**):  $^1\text{H}$  NMR (400 MHz,  $\text{DMSO-}d_6$ )

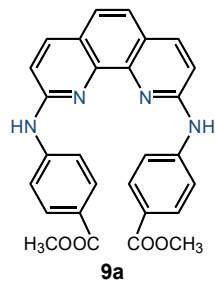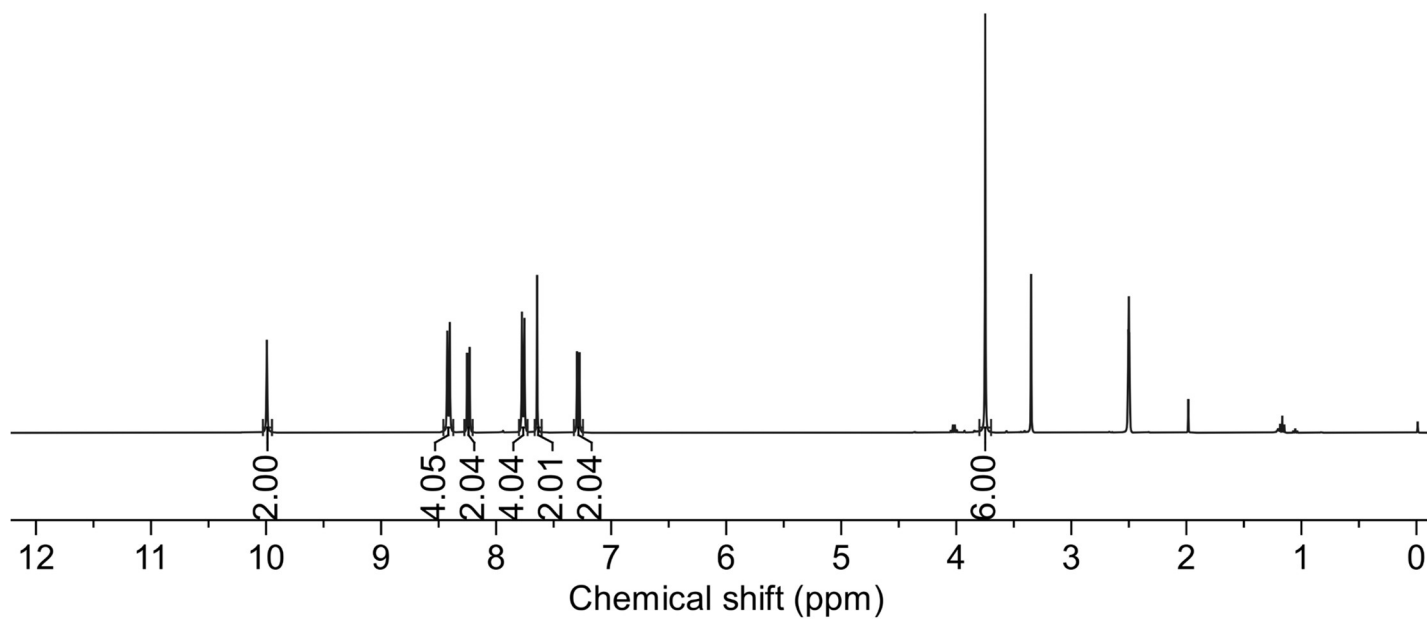

$^{13}\text{C}$  NMR (100 MHz, DMSO- $d_6$ )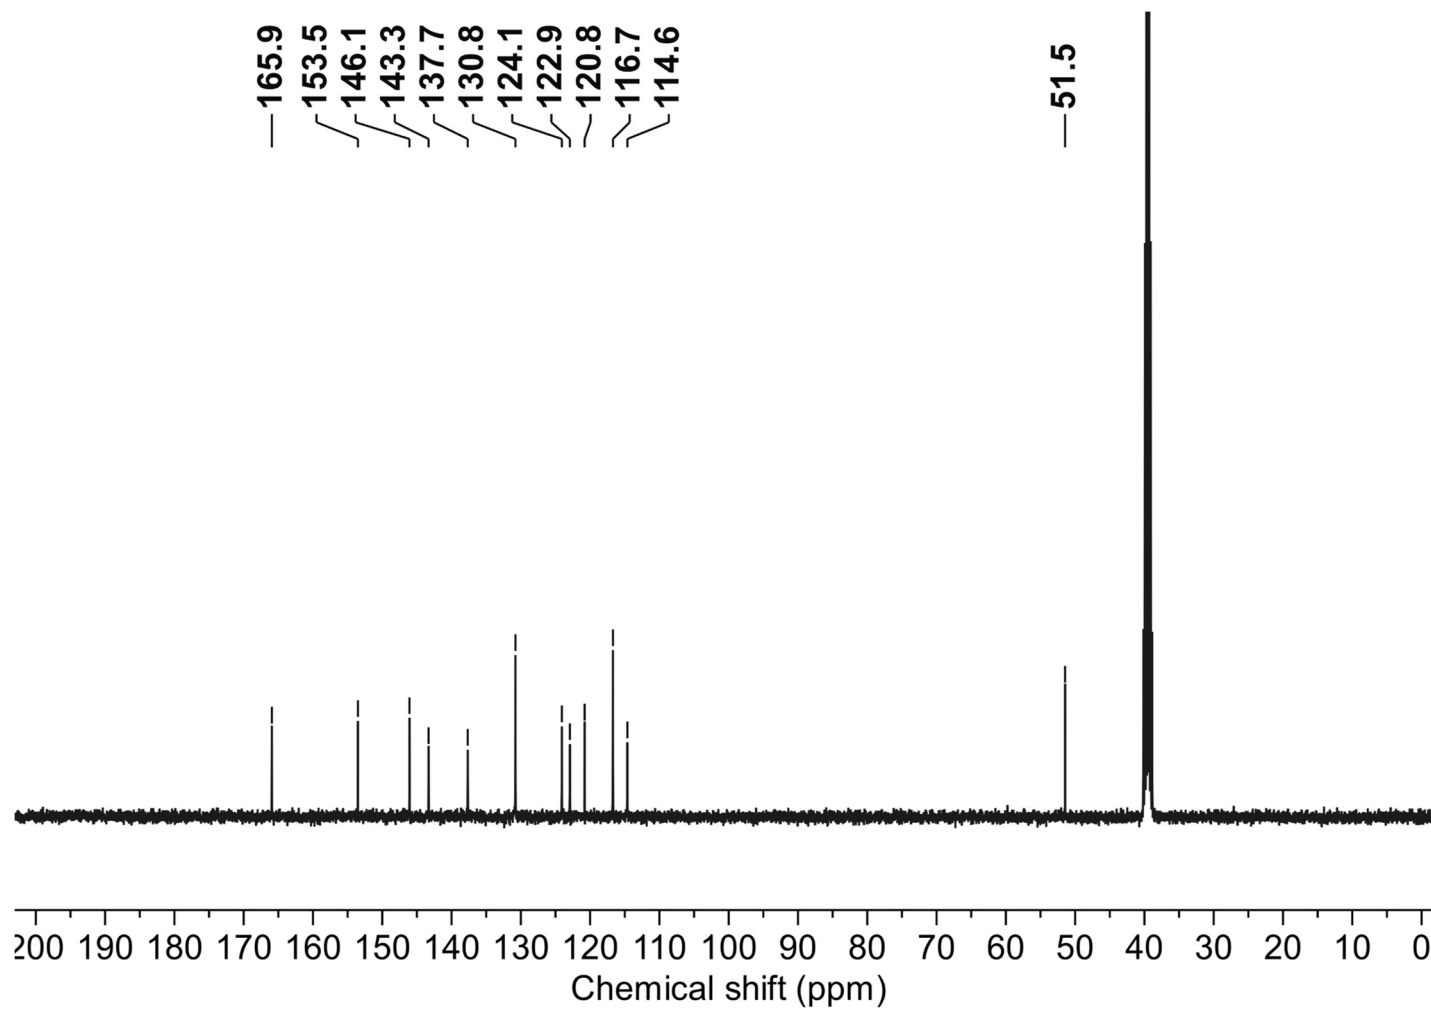

**1,1'-(((1,10-phenanthroline-2,9-diyl)bis(azanediyl))bis(4,1-phenylene))bis(ethan-1-one) (10a):**  $^1\text{H}$  NMR (400 MHz,  $\text{DMSO-}d_6$ )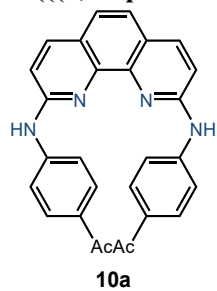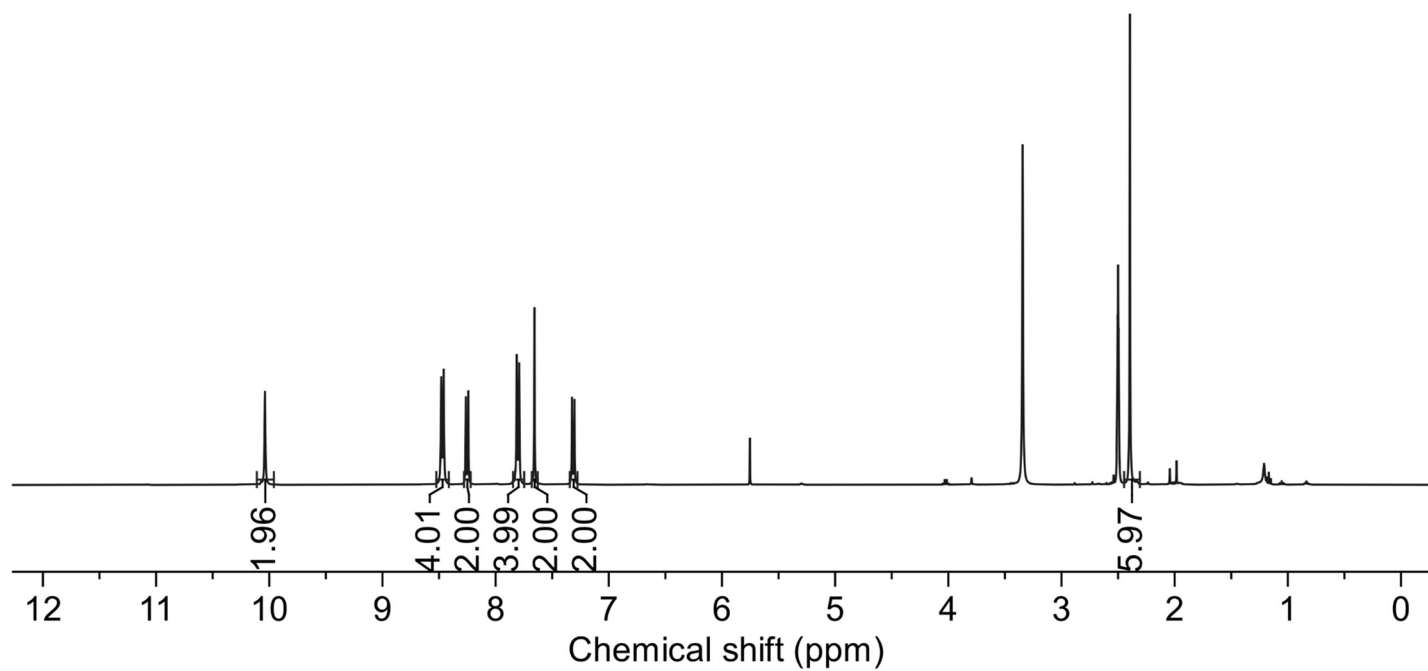

$^{13}\text{C}$  NMR (100 MHz, DMSO- $d_6$ )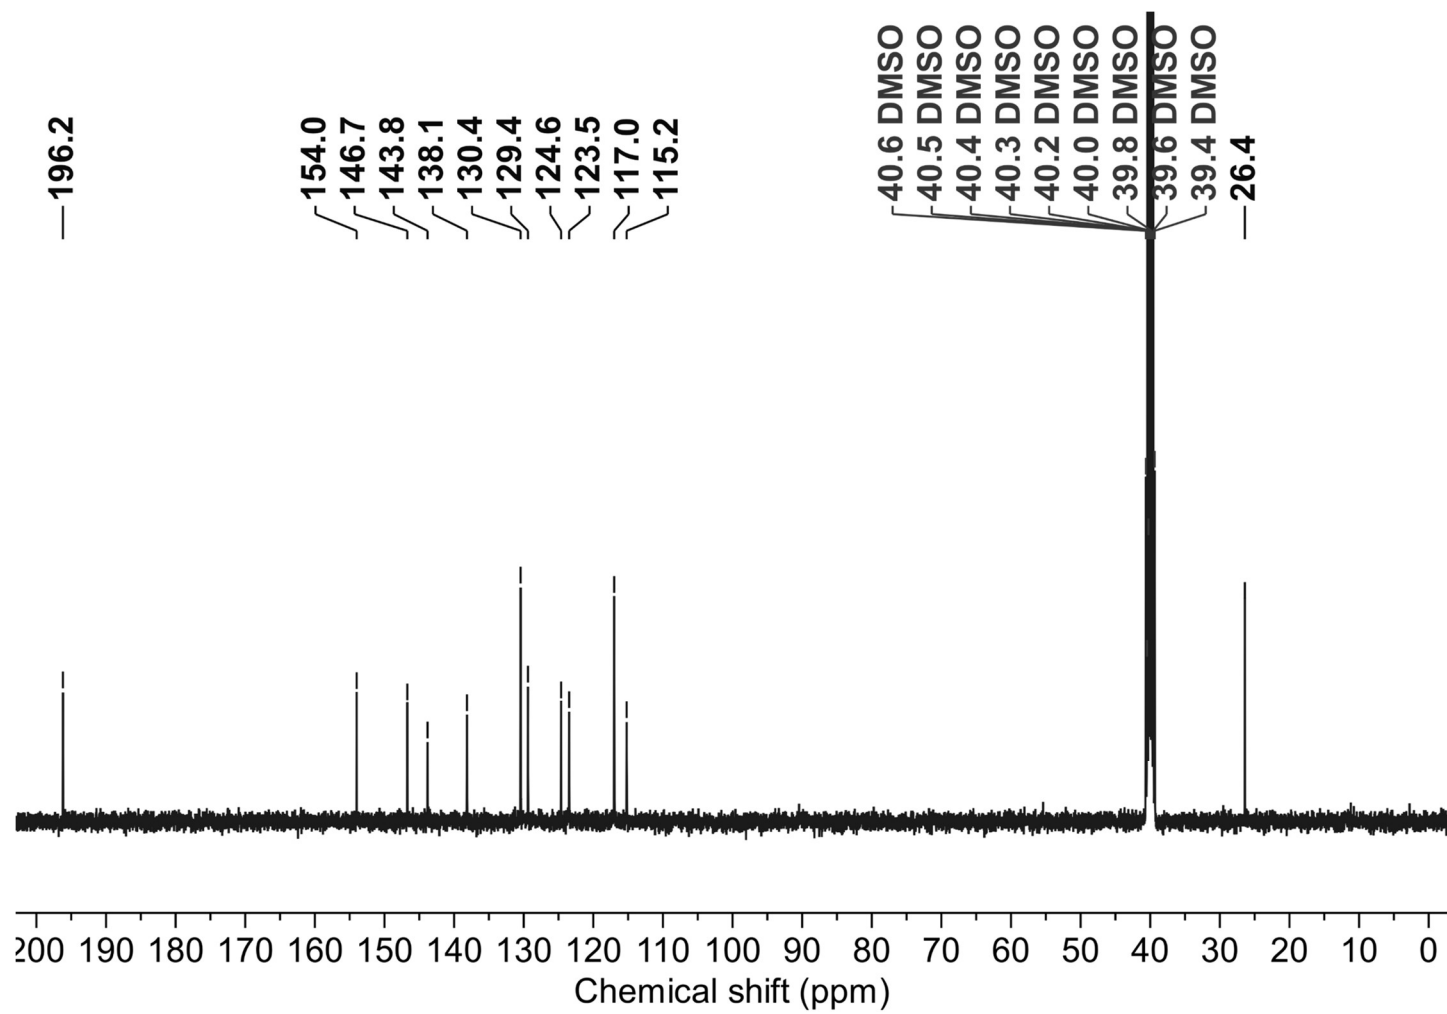

***N*<sup>2</sup>,*N*<sup>9</sup>-bis(4-(trifluoromethyl)phenyl)-1,10-phenanthroline-2,9-diamine (11a):** <sup>1</sup>H NMR (400 MHz, DMSO-*d*<sub>6</sub>)

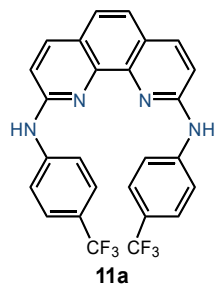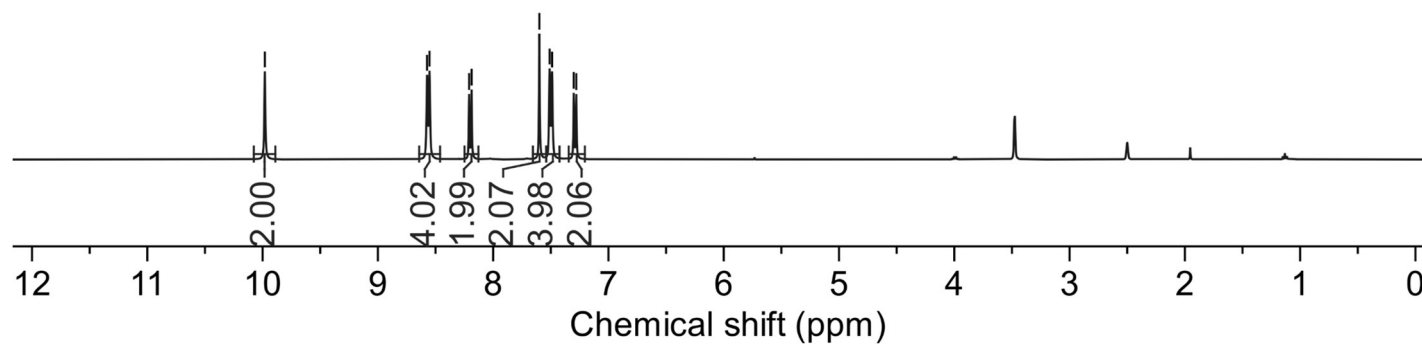

$^{13}\text{C}$  NMR (100 MHz,  $\text{DMSO-}d_6$ )

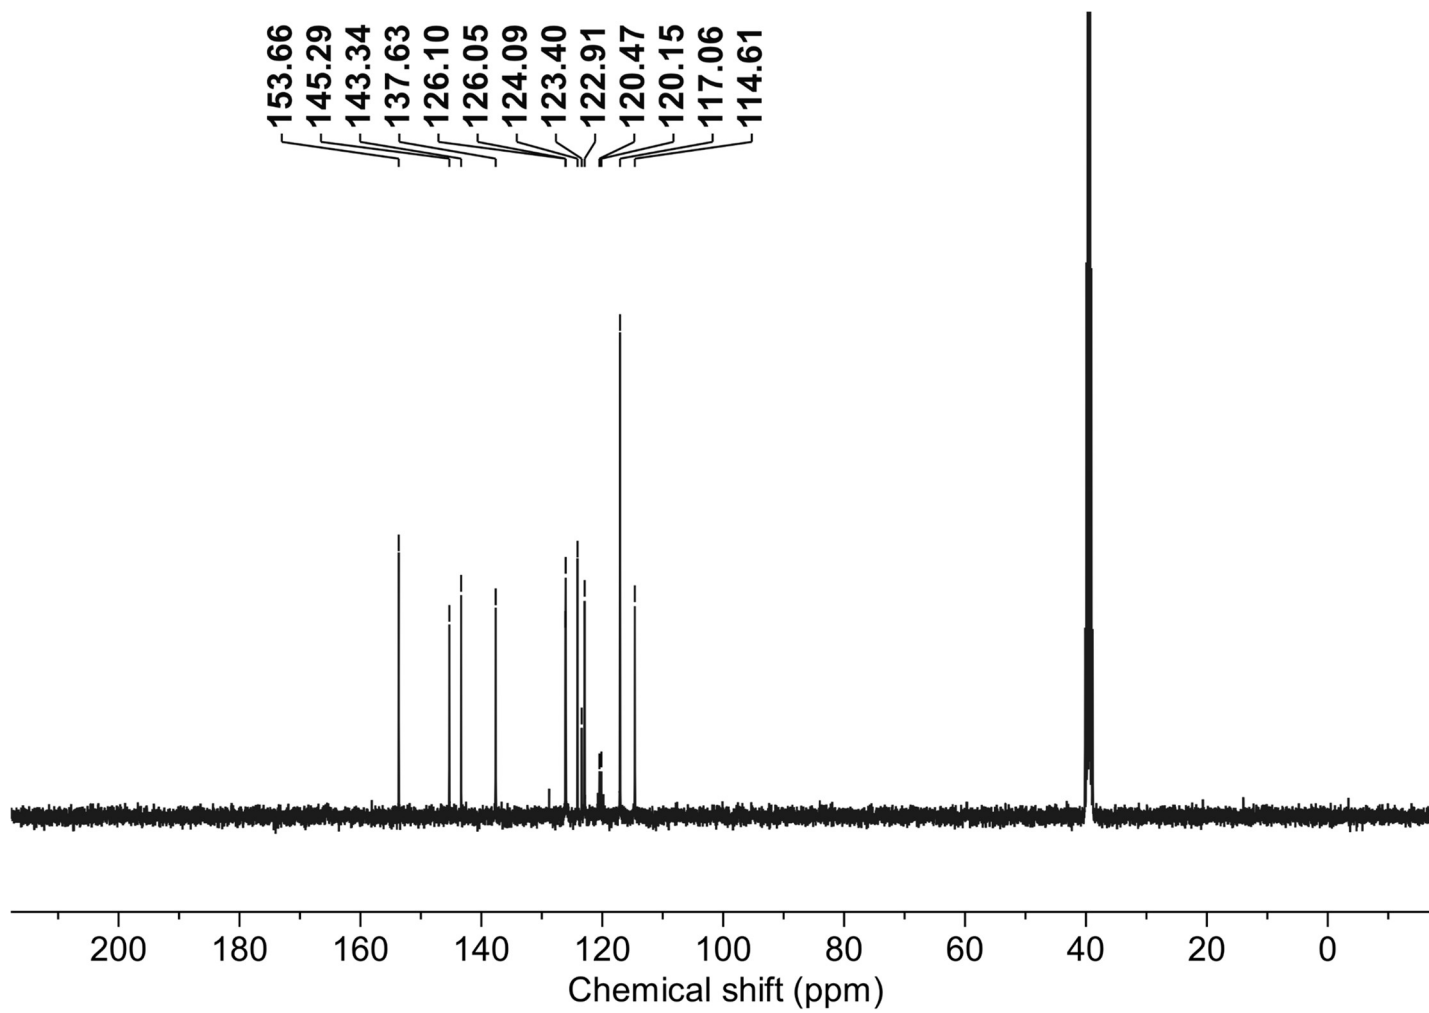

*N*<sup>2</sup>,*N*<sup>9</sup>-di(pyridin-2-yl)-1,10-phenanthroline-2,9-diamine (**12a**): <sup>1</sup>H NMR (400 MHz, CDCl<sub>3</sub>)

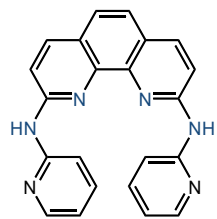

**12a**

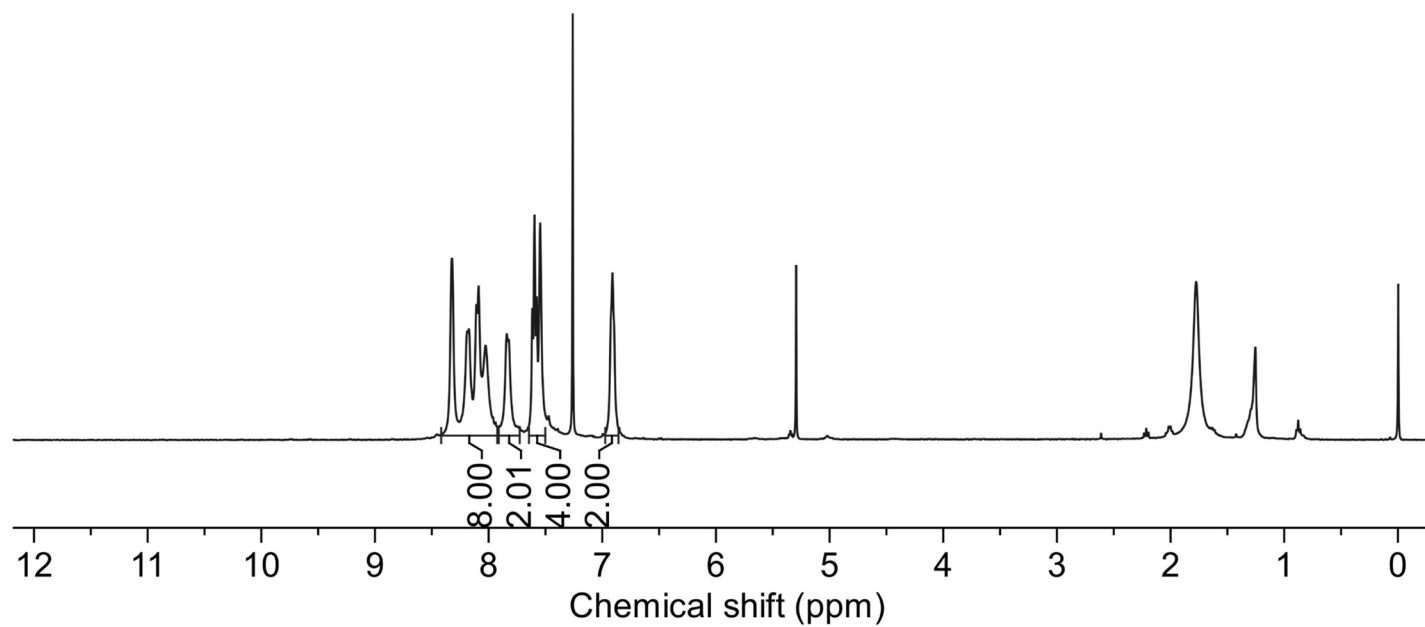

$N^2,N^9$ -di(quinolin-8-yl)-1,10-phenanthroline-2,9-diamine (**13a**):  $^1\text{H}$  NMR (400 MHz,  $\text{CDCl}_3$ )

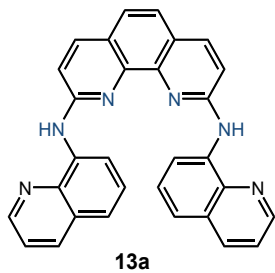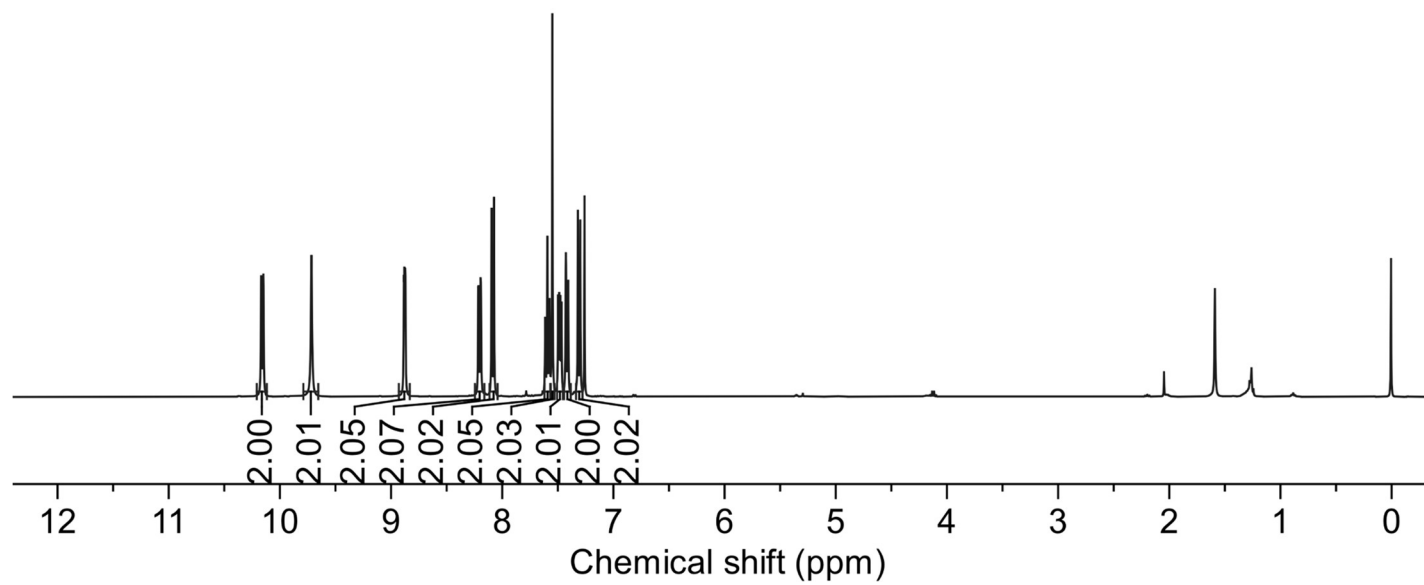

$^{13}\text{C}$  NMR (100 MHz,  $\text{CDCl}_3$ )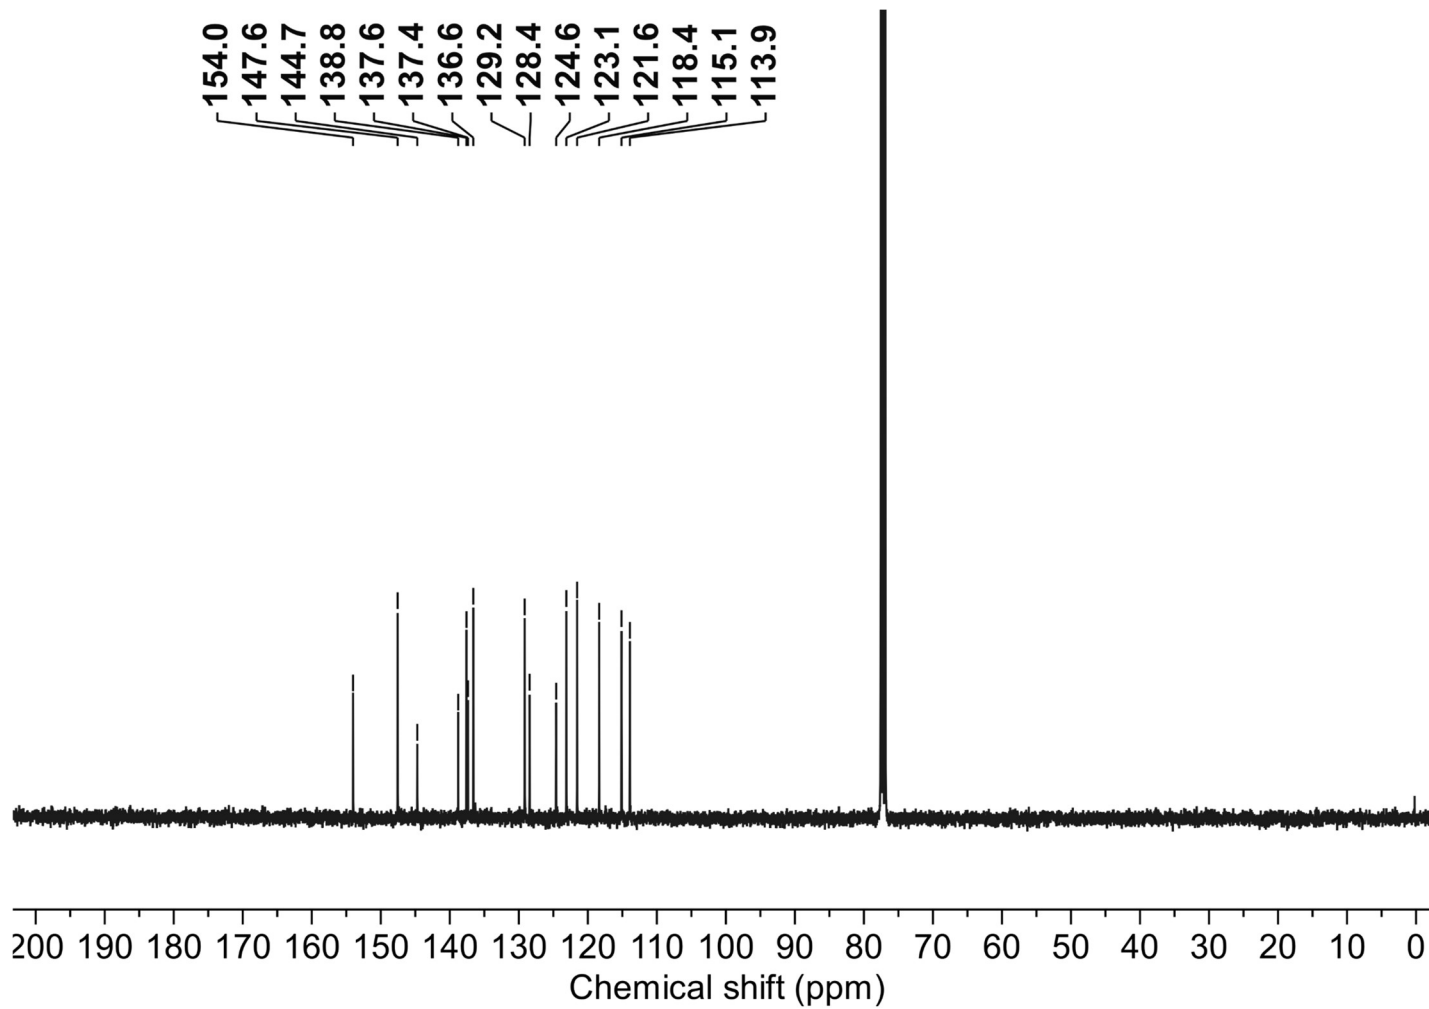

*N*<sup>2</sup>,*N*<sup>9</sup>-di(naphthalen-1-yl)-1,10-phenanthroline-2,9-diamine (**14a**): <sup>1</sup>H NMR (400 MHz, CDCl<sub>3</sub>)

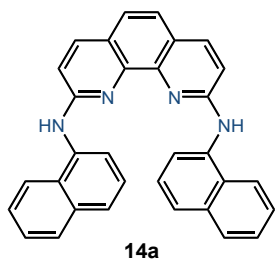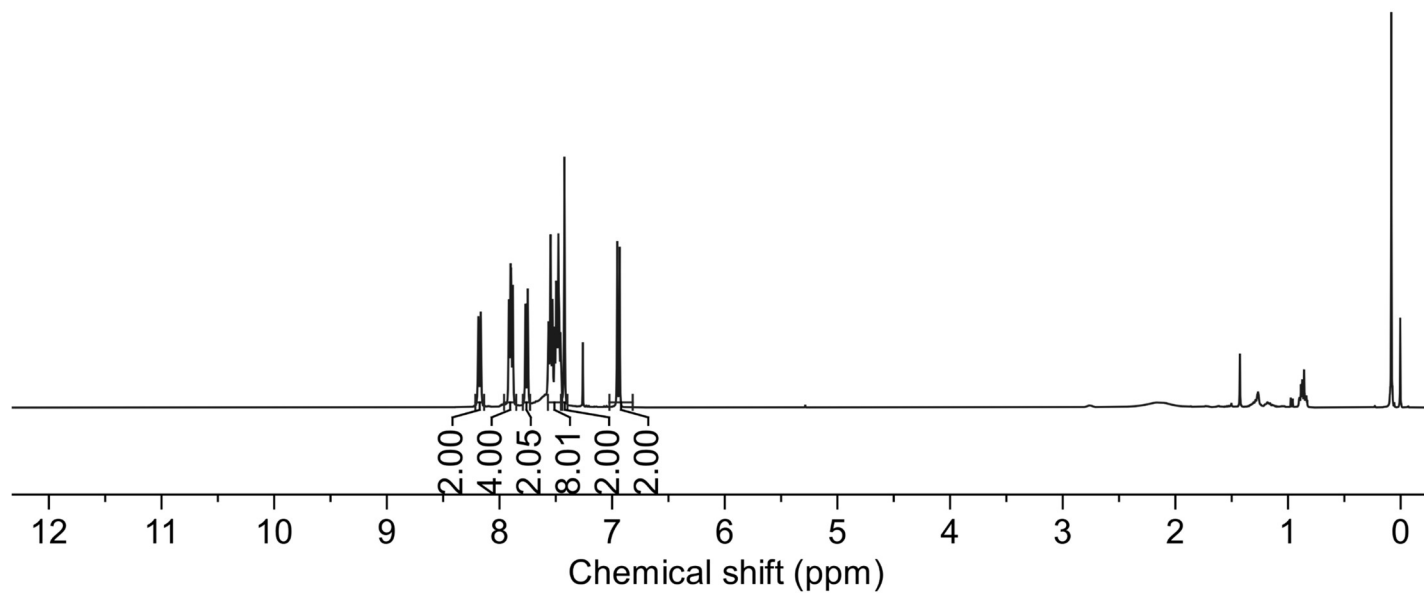

$^{13}\text{C}$  NMR (100 MHz,  $\text{CDCl}_3$ )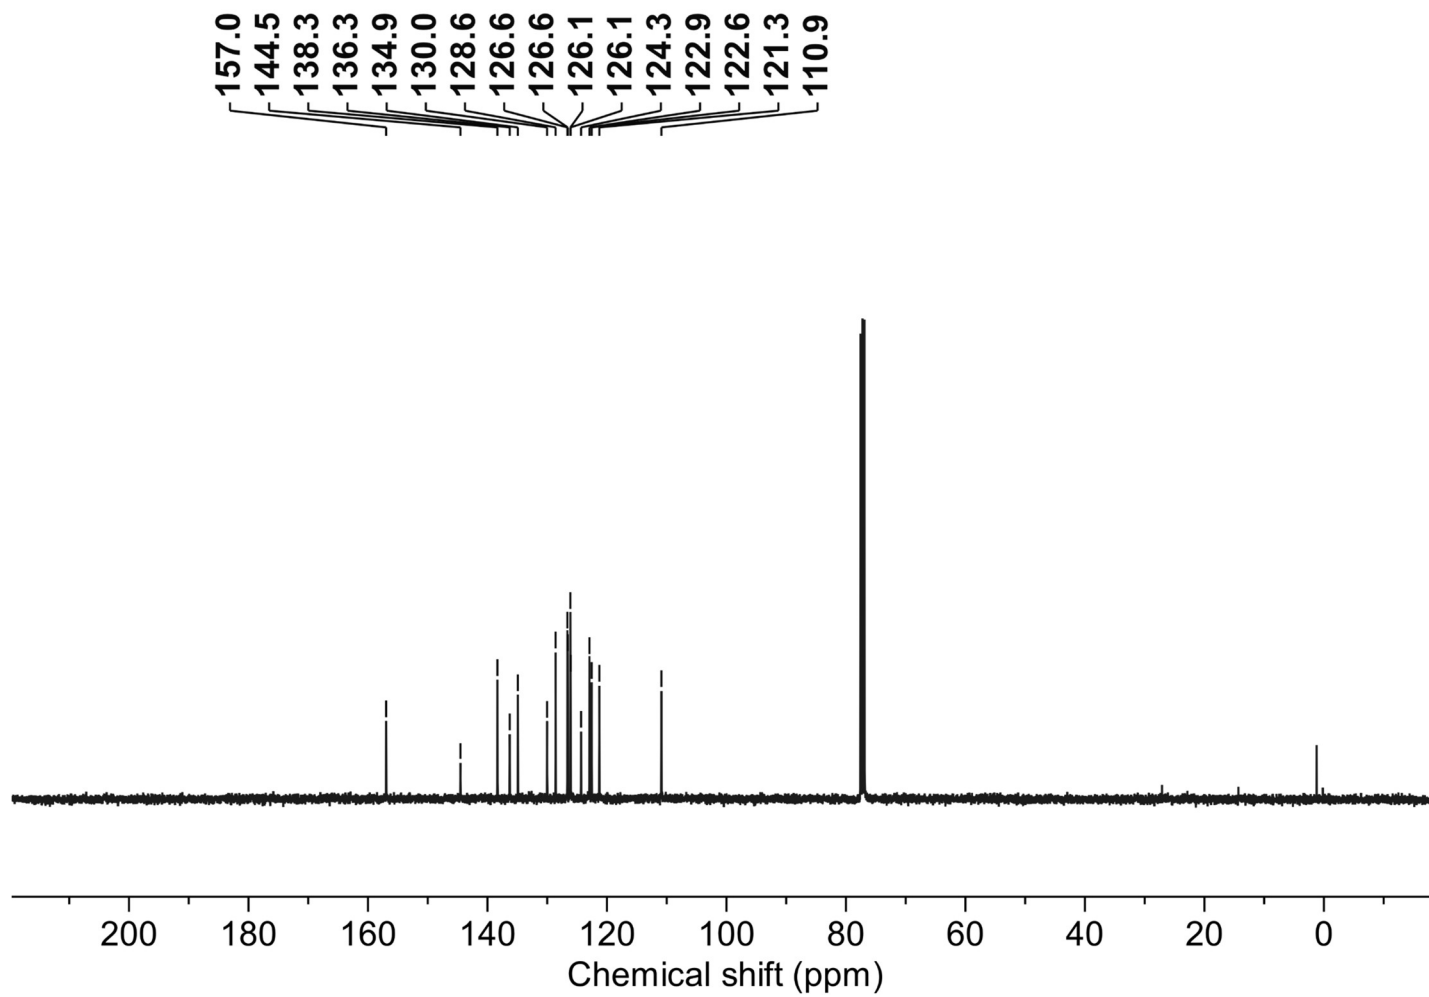

*N*<sup>2</sup>,*N*<sup>9</sup>-di(naphthalen-2-yl)-1,10-phenanthroline-2,9-diamine (**15a**): <sup>1</sup>H NMR (400 MHz, DMSO-*d*<sub>6</sub>)

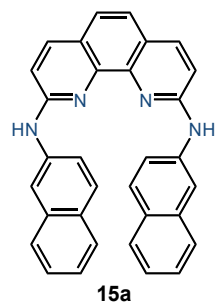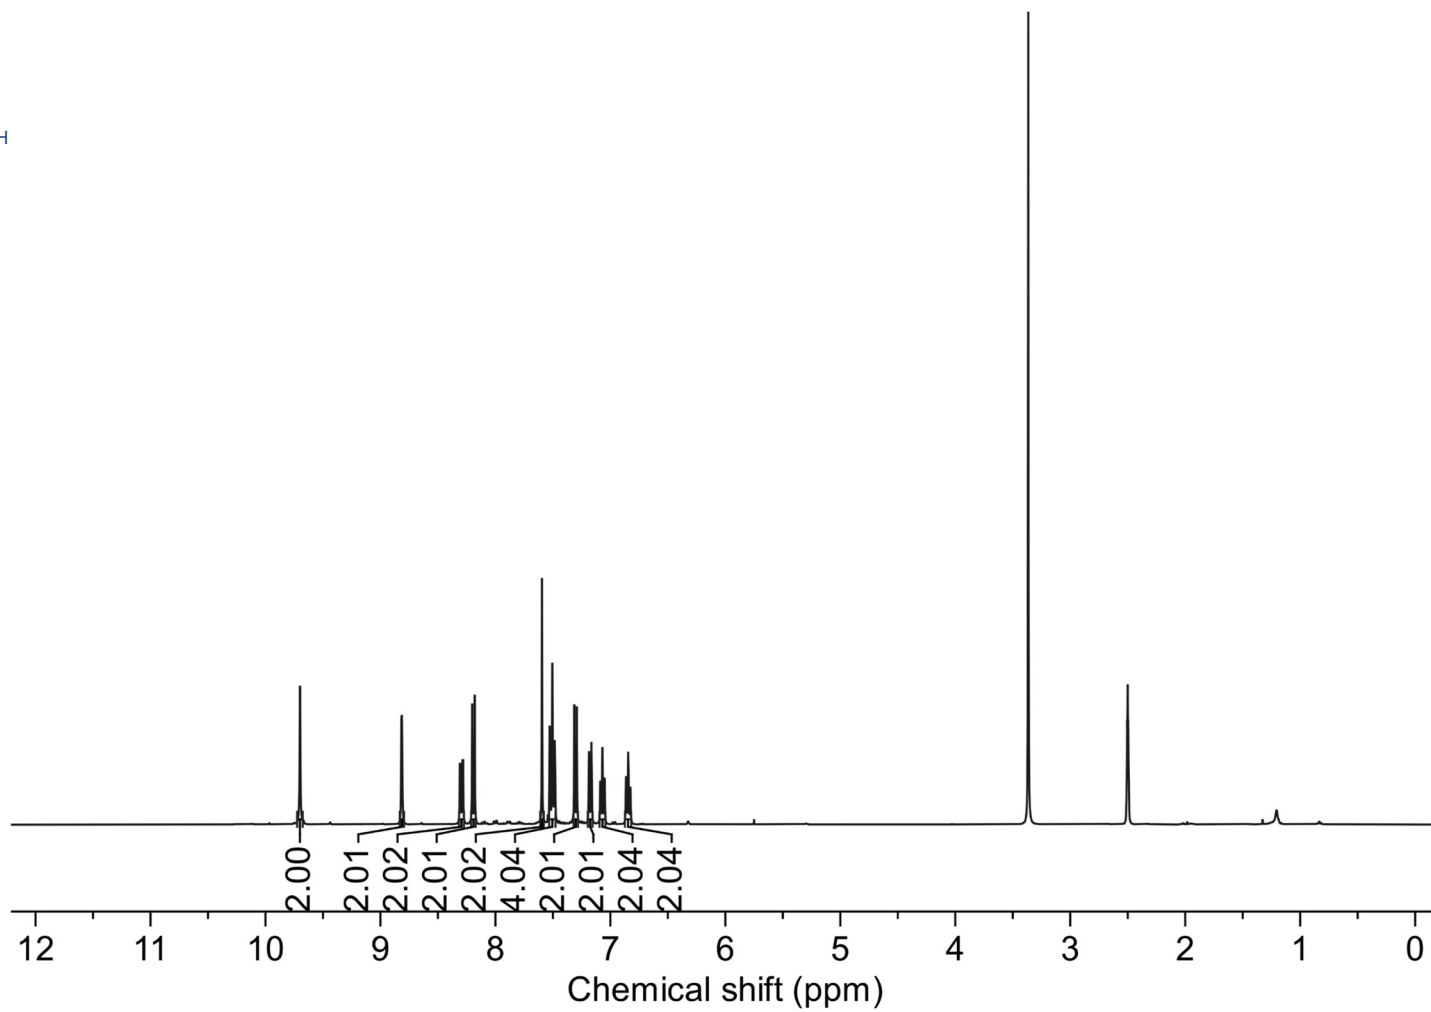

$^{13}\text{C}$  NMR (100 MHz, DMSO- $d_6$ )

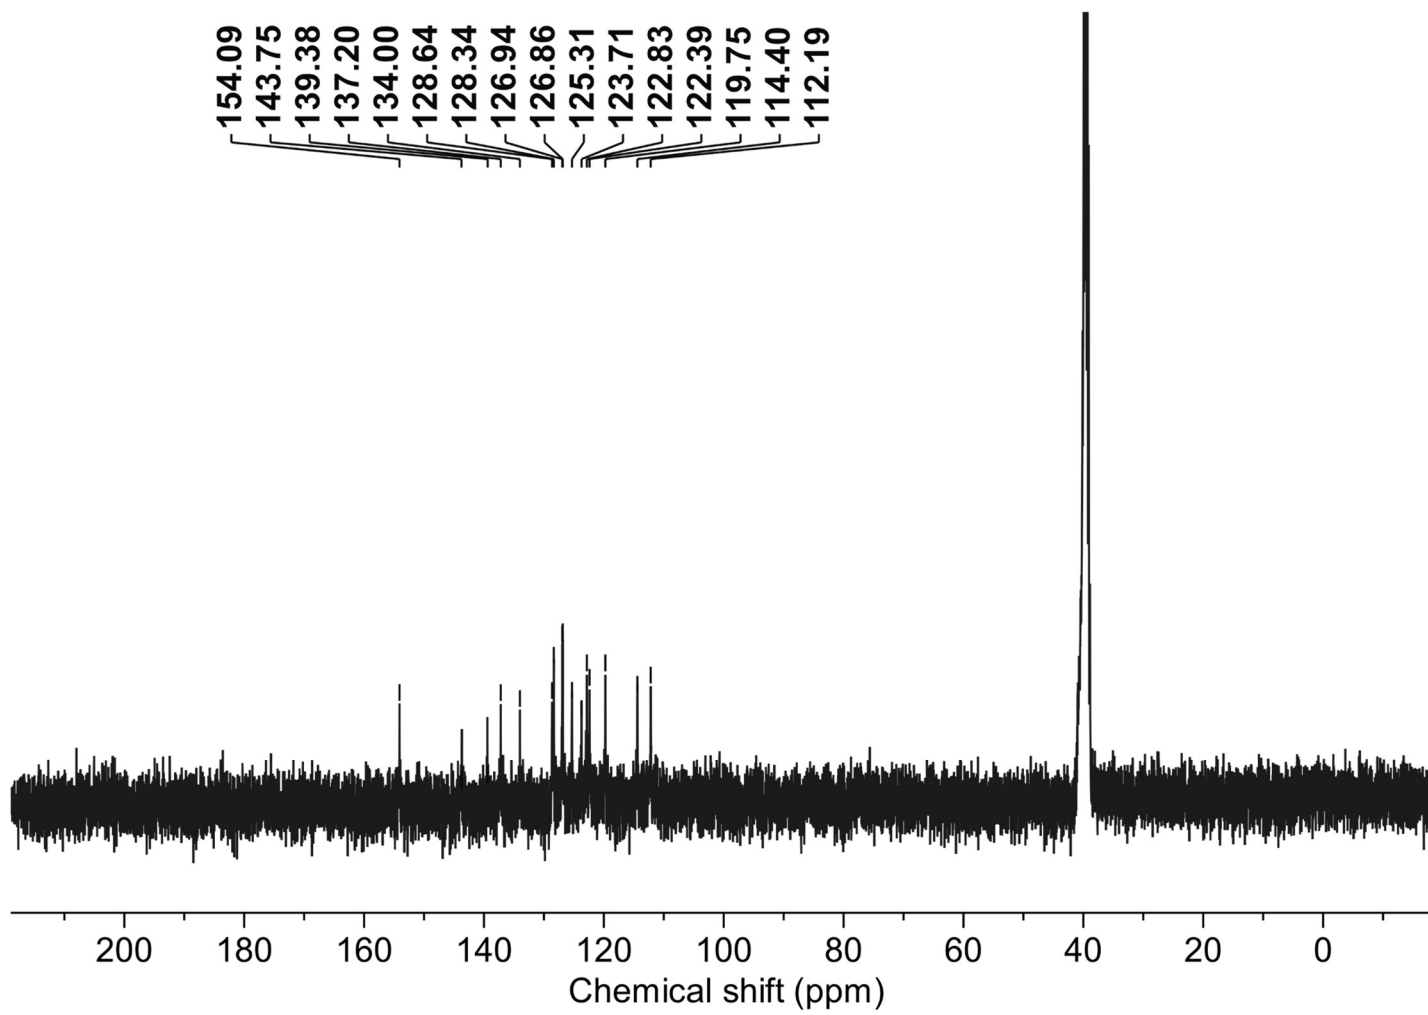

*N*<sup>2</sup>,*N*<sup>9</sup>-bis(3,4-dimethoxyphenyl)-1,10-phenanthroline-2,9-diamine (**16a**): <sup>1</sup>H NMR (400 MHz, CDCl<sub>3</sub>)

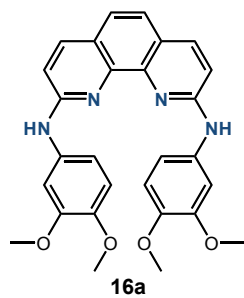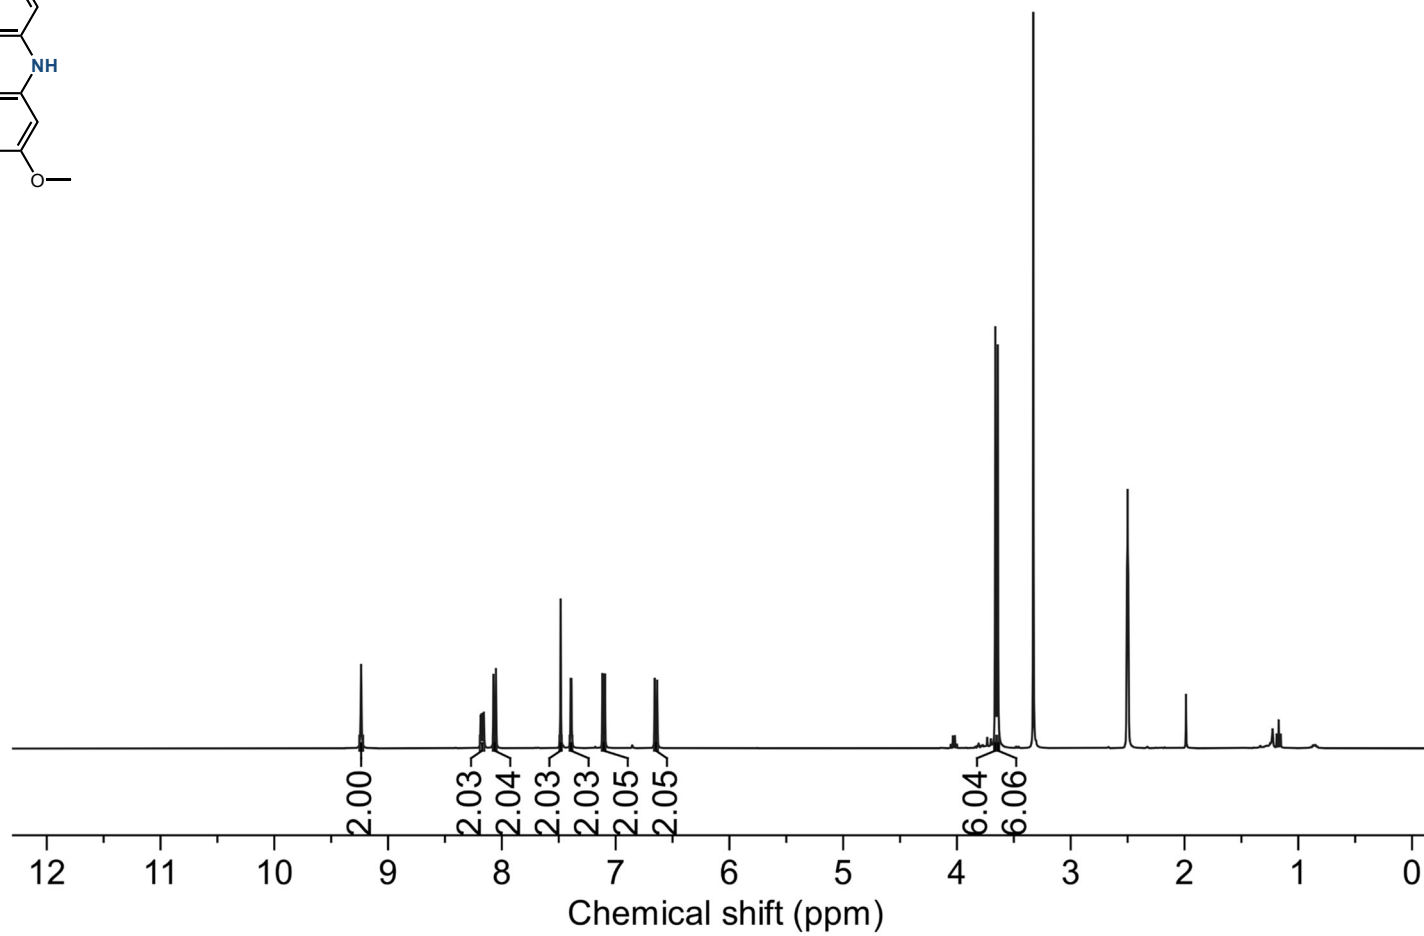

$^{13}\text{C}$  NMR (100 MHz,  $\text{CDCl}_3$ )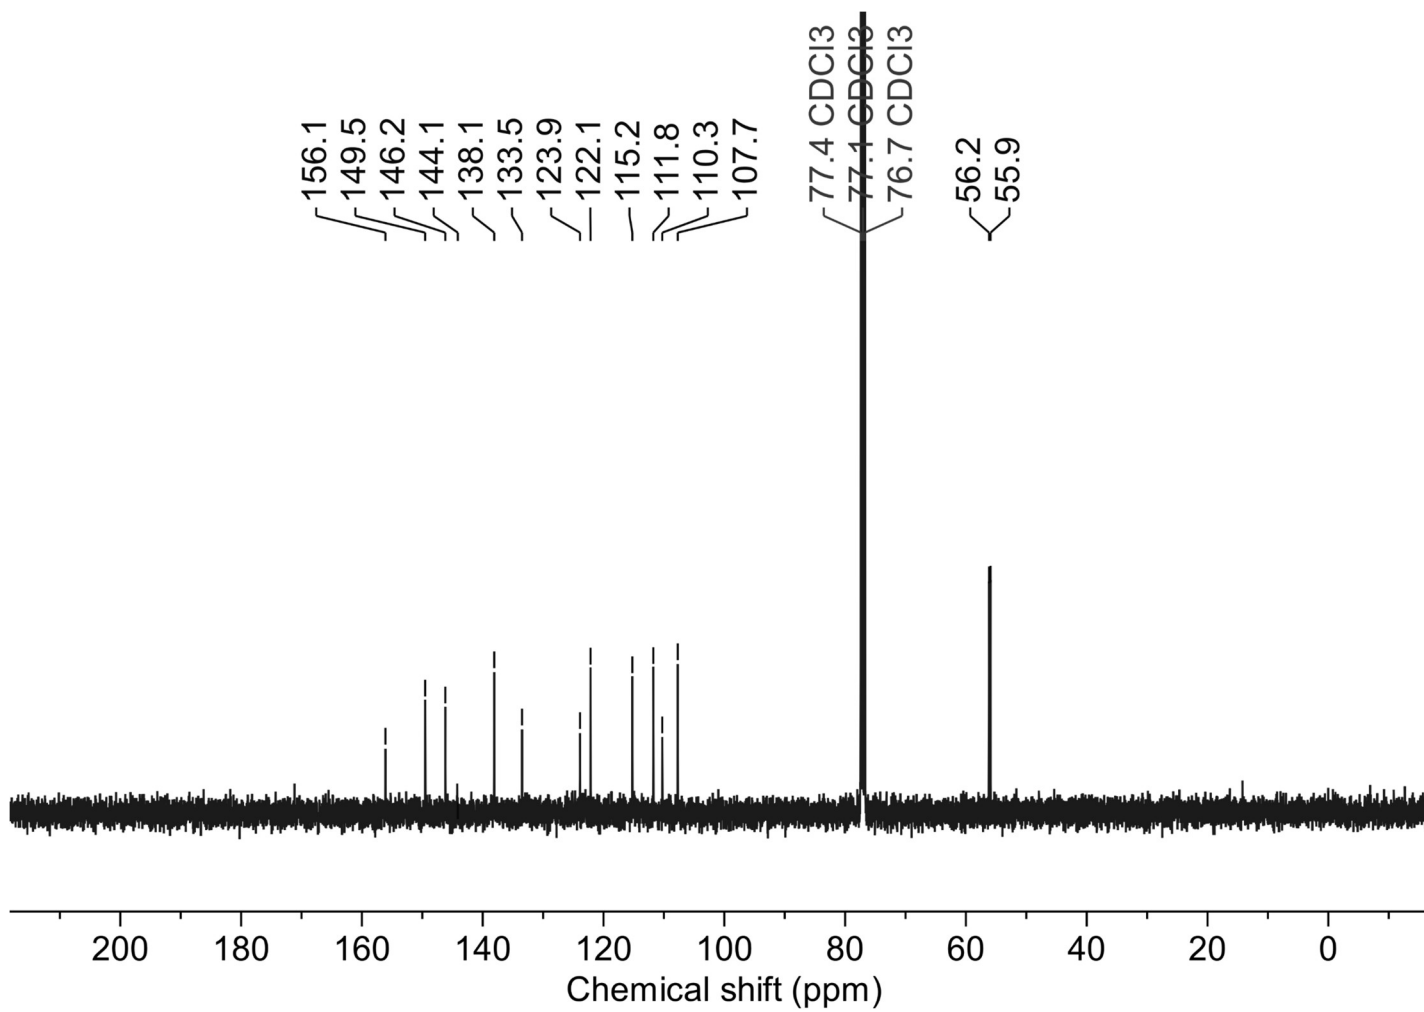

*N*<sup>1</sup>,*N*<sup>4</sup>-di(pyridin-2-yl)benzene-1,4-diamine (17a): <sup>1</sup>H NMR (400 MHz, DMSO-*d*<sub>6</sub>)

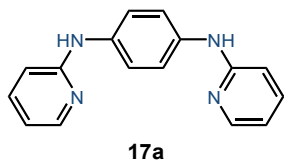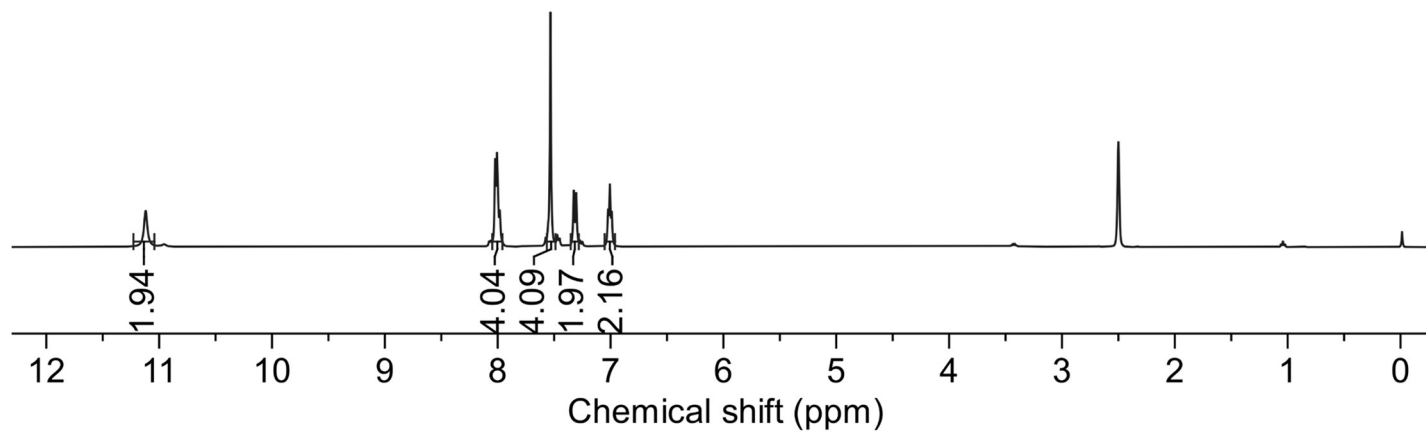

$^{13}\text{C}$  NMR (100 MHz,  $\text{DMSO-}d_6$ )

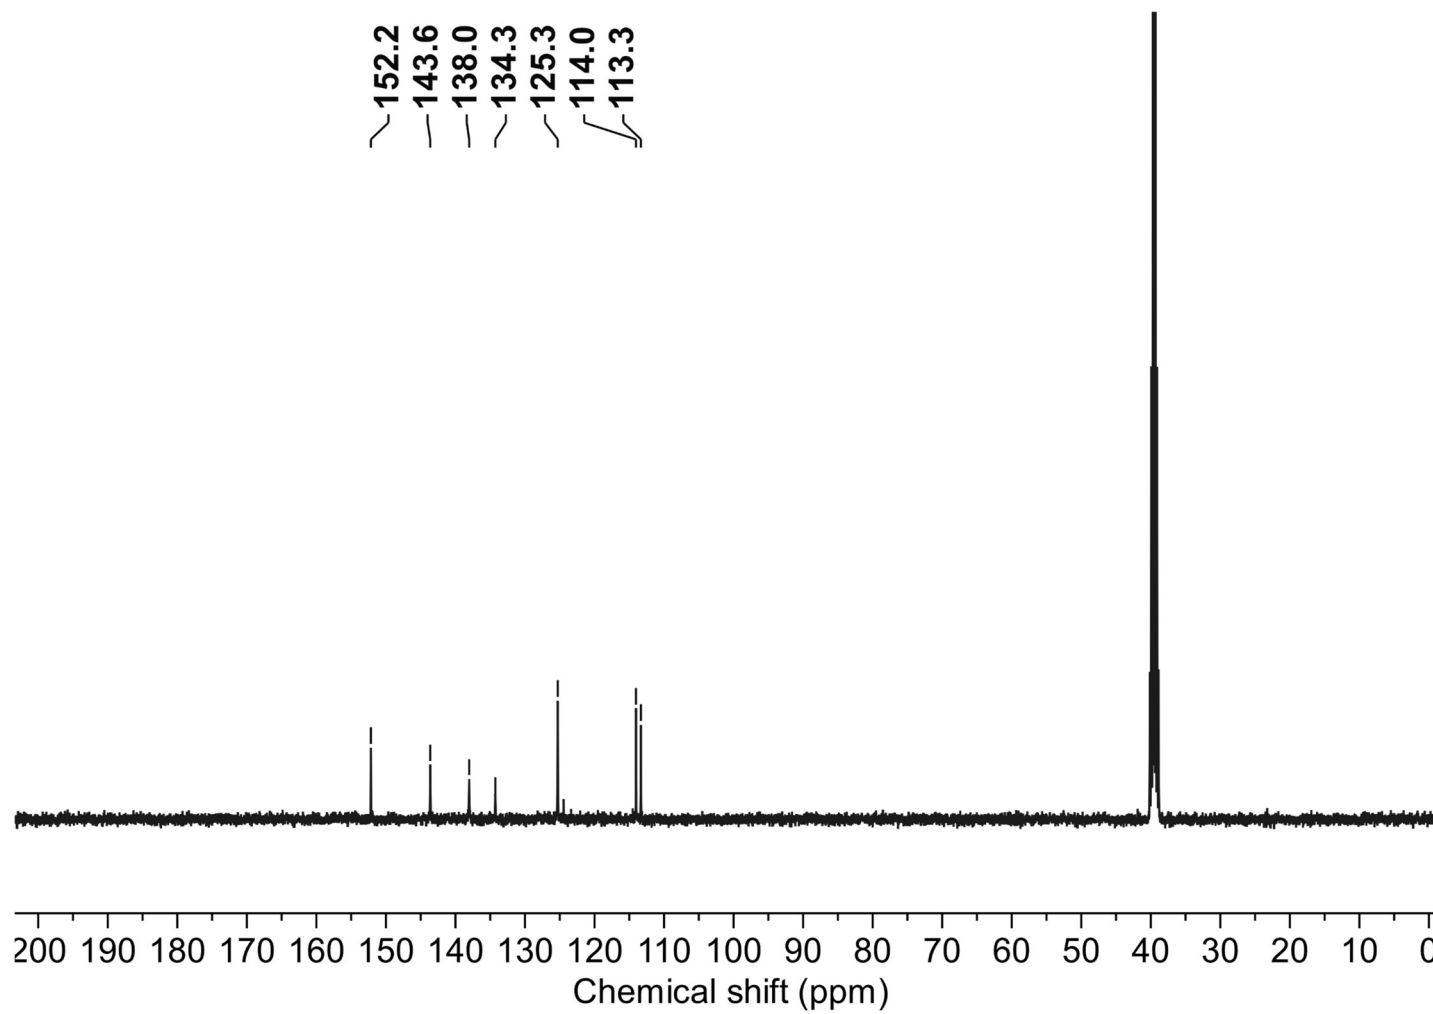

*N*<sup>1</sup>-(pyridin-2-yl)-*N*<sup>4</sup>-(quinolin-2-yl)benzene-1,4-diamine (**18a**): <sup>1</sup>H NMR (400 MHz, DMSO-*d*<sub>6</sub>)

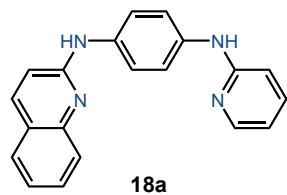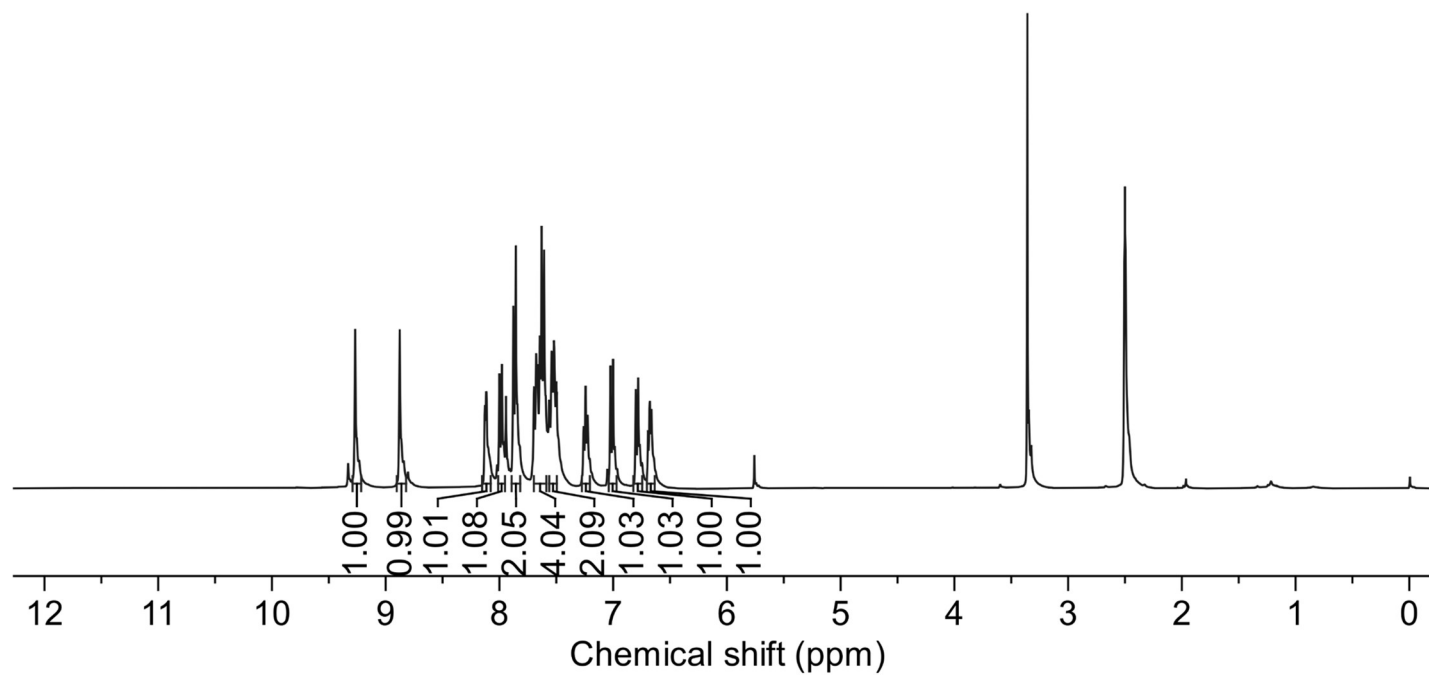

$^{13}\text{C}$  NMR (100 MHz,  $\text{DMSO-}d_6$ )

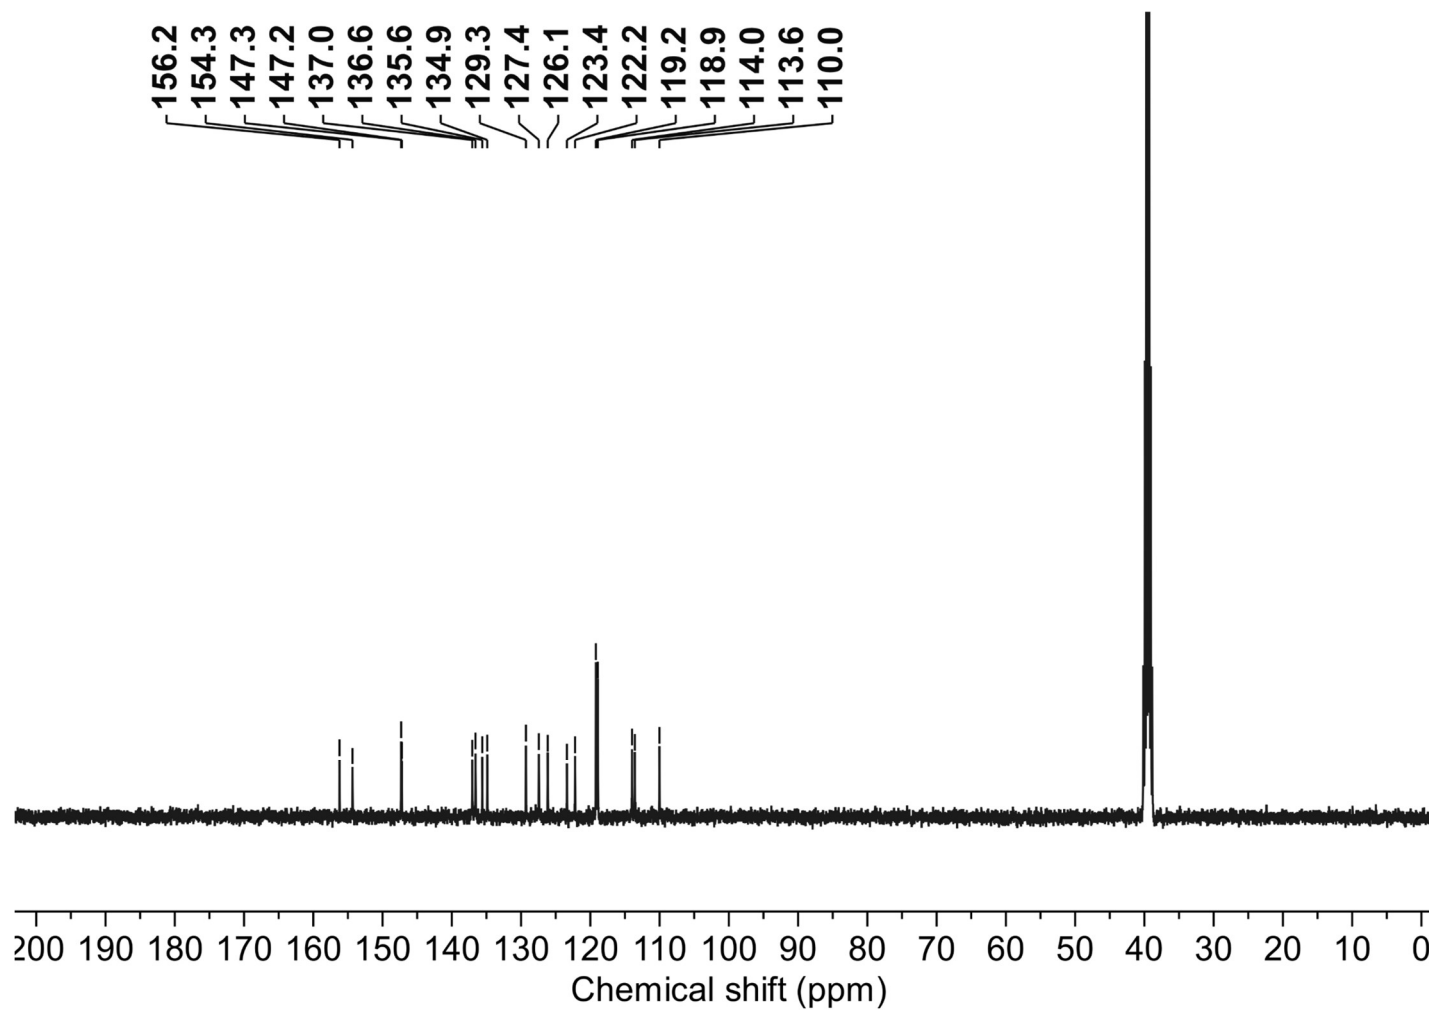

*N*<sup>1</sup>,*N*<sup>4</sup>-di(quinolin-2-yl)benzene-1,4-diamine (**19a**): <sup>1</sup>H NMR (400 MHz, Methanol-*d*<sub>4</sub>)

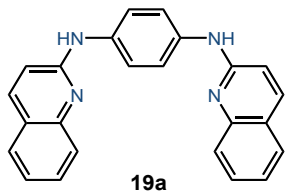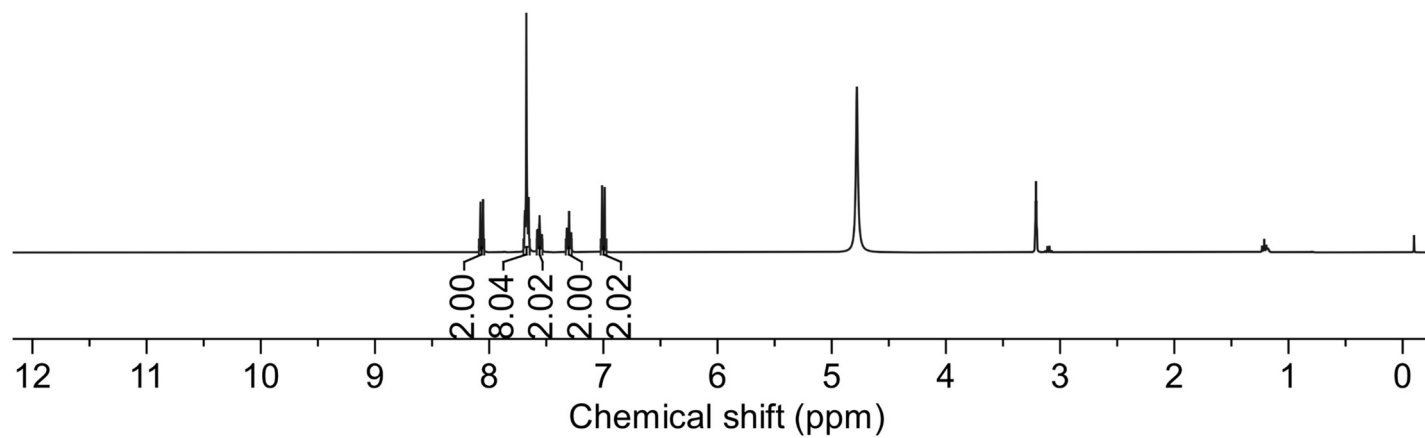

$^{13}\text{C}$  NMR (100 MHz, Methanol- $d_4$ )

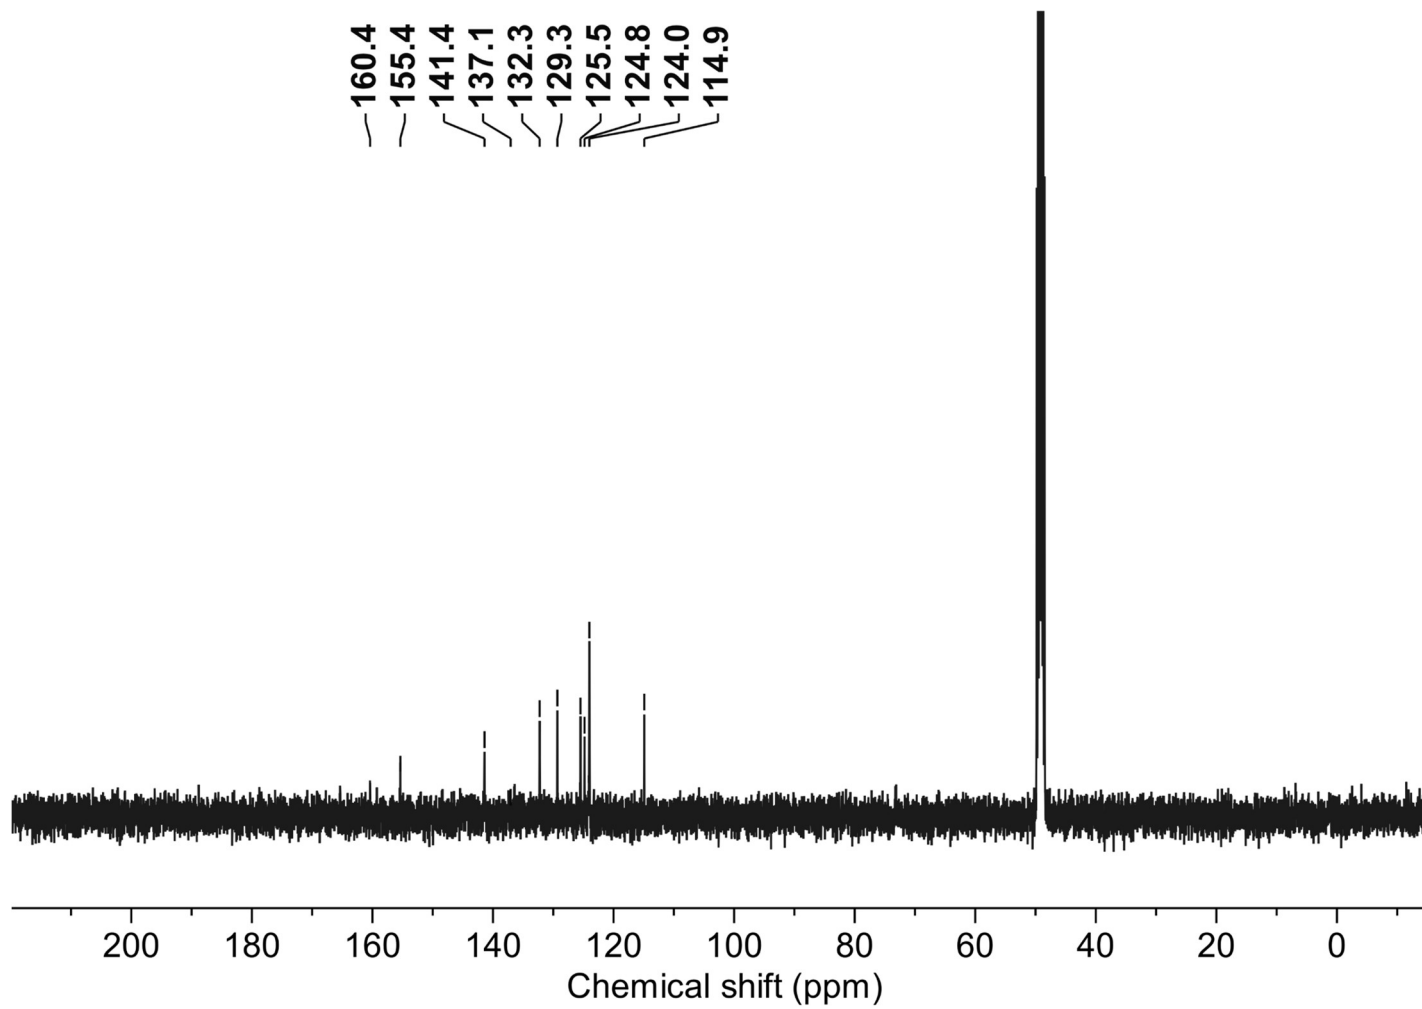

$N^1,N^4$ -bis(7-bromoquinolin-2-yl)benzene-1,4-diamine (**20a**):  $^1\text{H}$  NMR (400 MHz,  $\text{DMSO-}d_6$ )

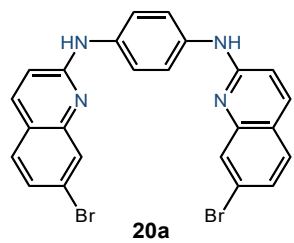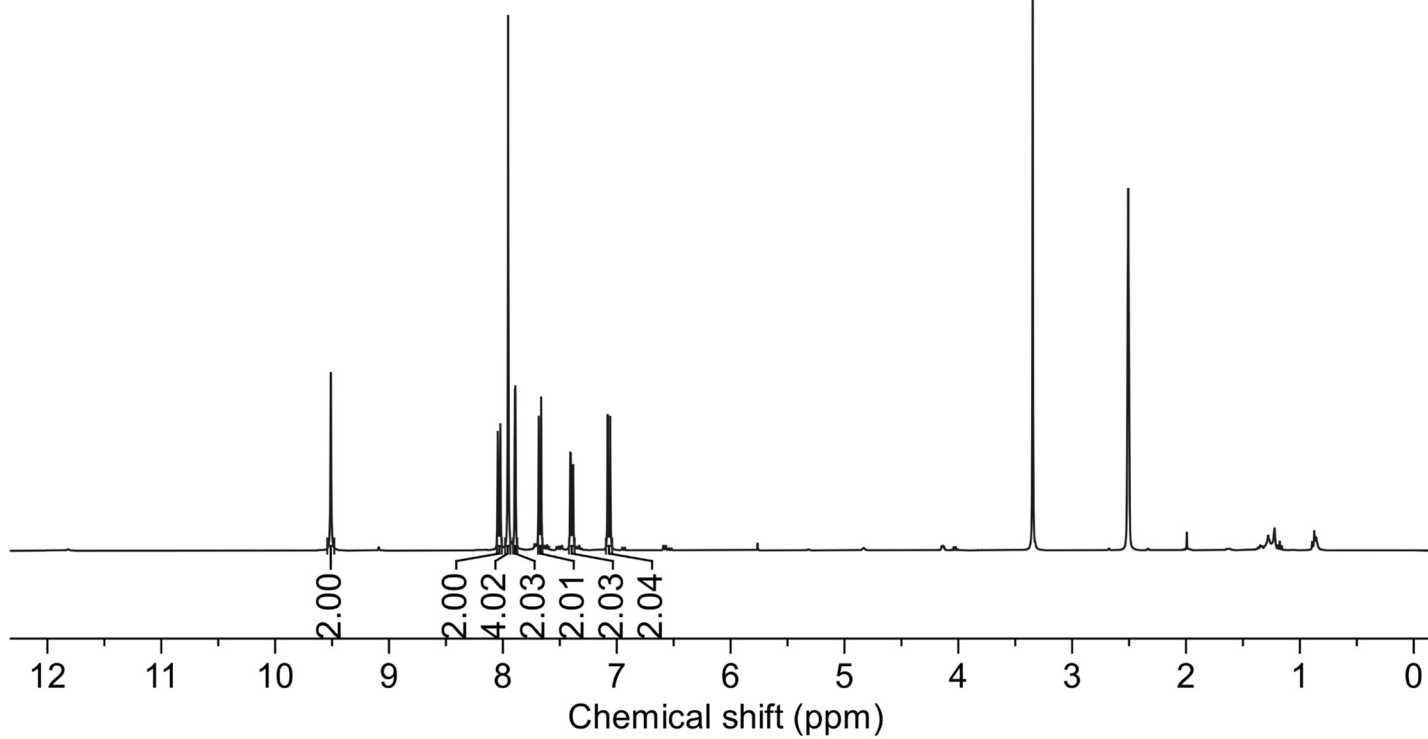

$^{13}\text{C}$  NMR (100 MHz, DMSO- $d_6$ )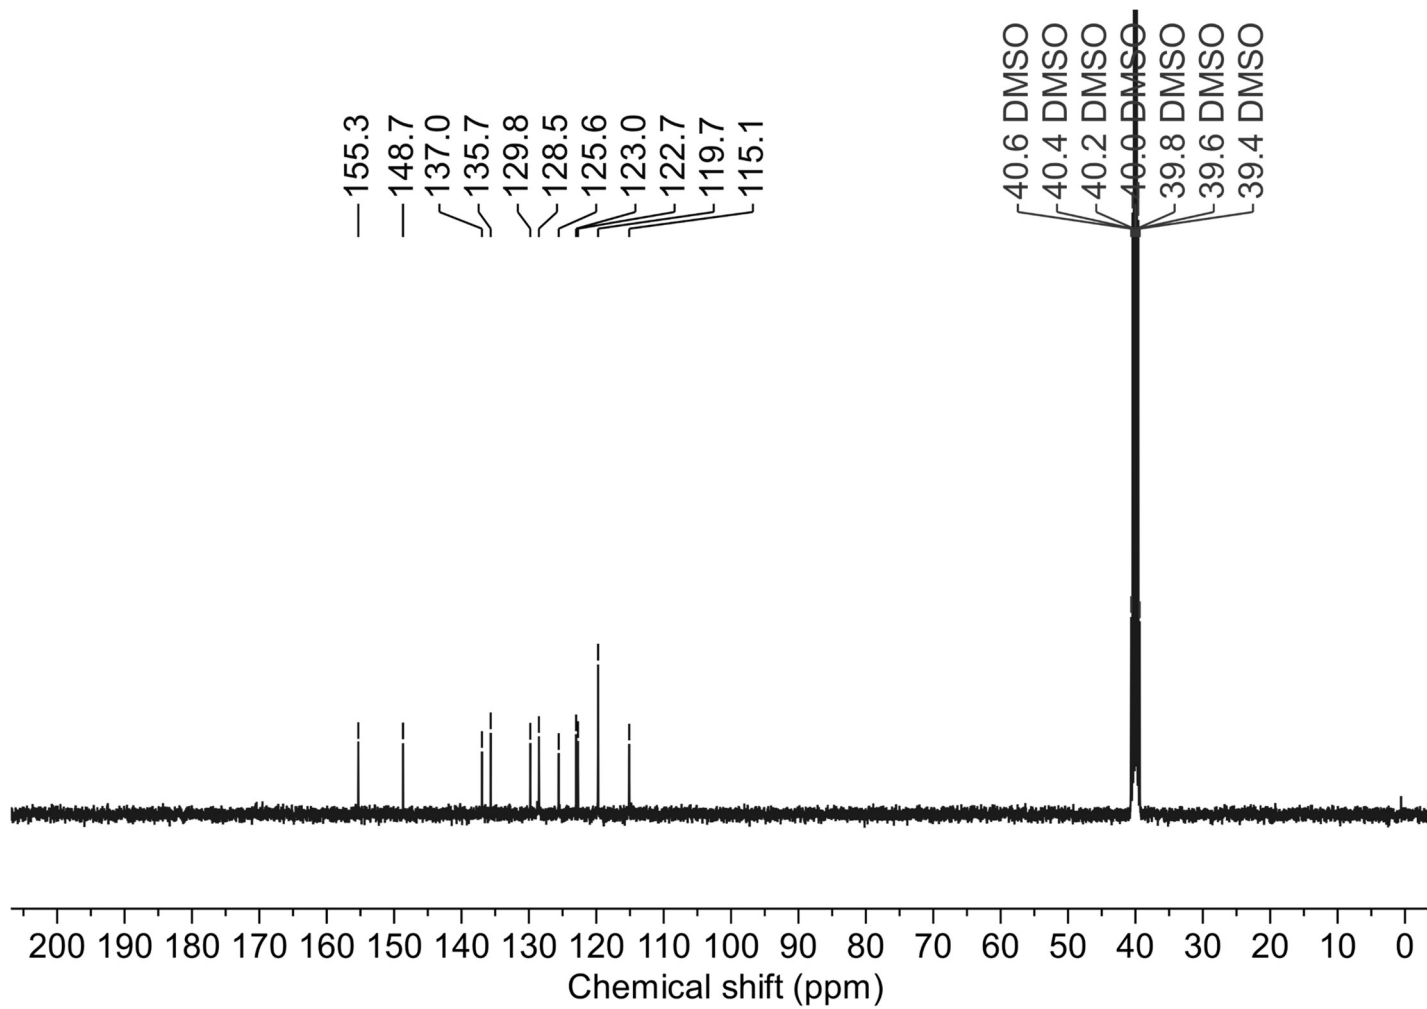

***N*<sup>1</sup>-(1,10-phenanthrolin-2-yl)-*N*<sup>4</sup>-(quinolin-2-yl)benzene-1,4-diamine (21a):** <sup>1</sup>H NMR (400 MHz, CDCl<sub>3</sub>)

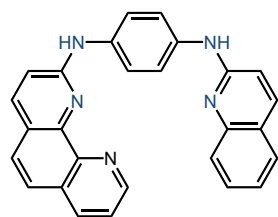

**21a**

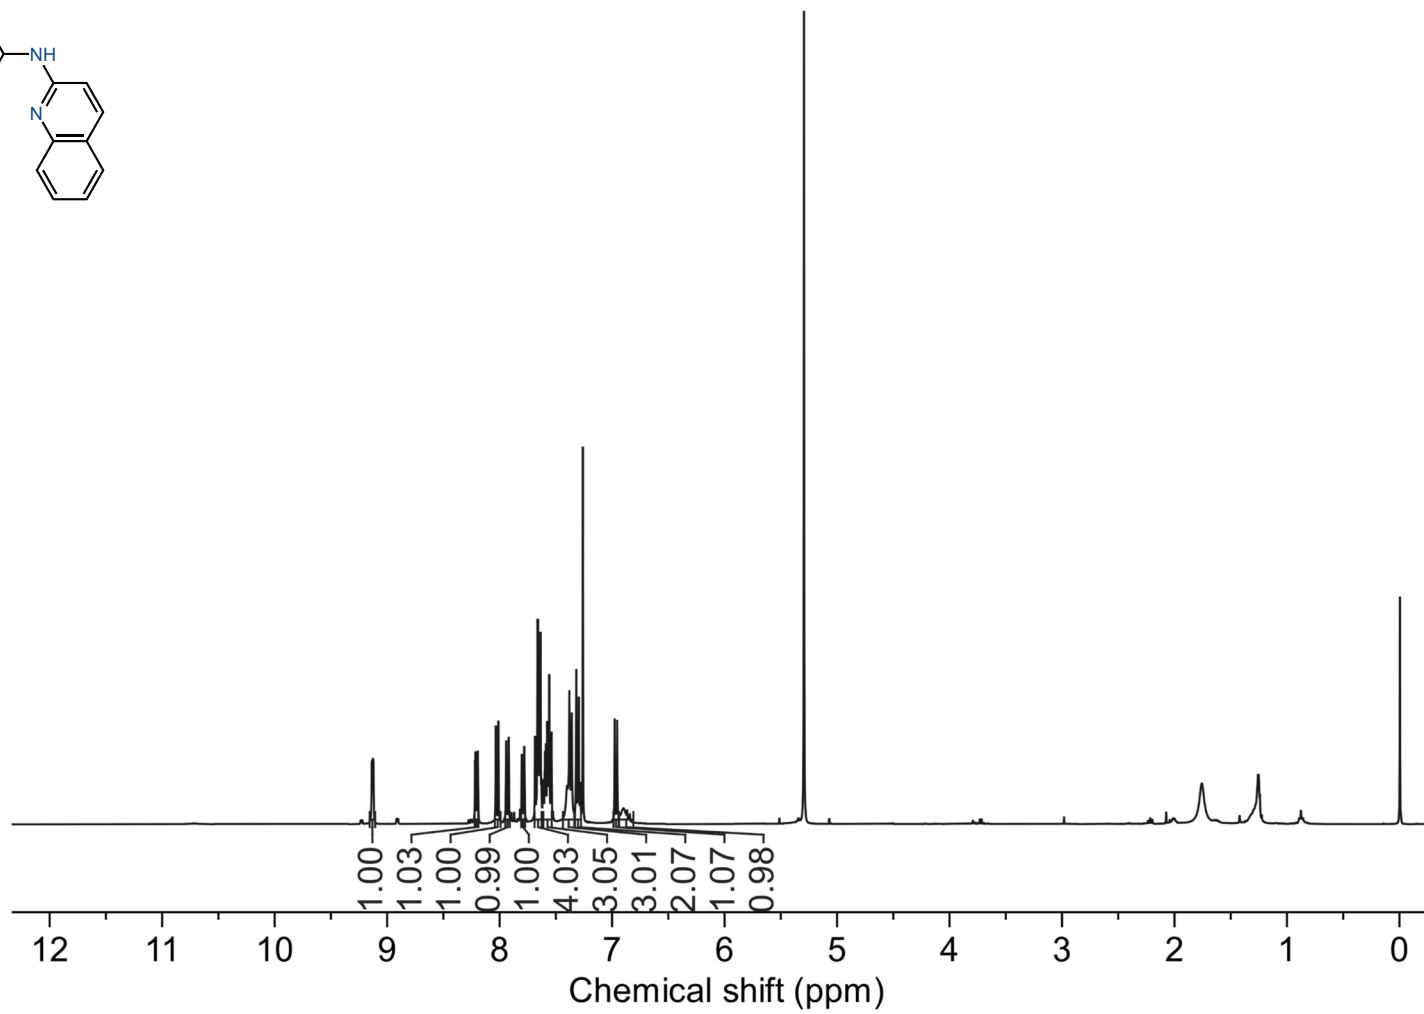

$^{13}\text{C}$  NMR (100 MHz,  $\text{CDCl}_3$ )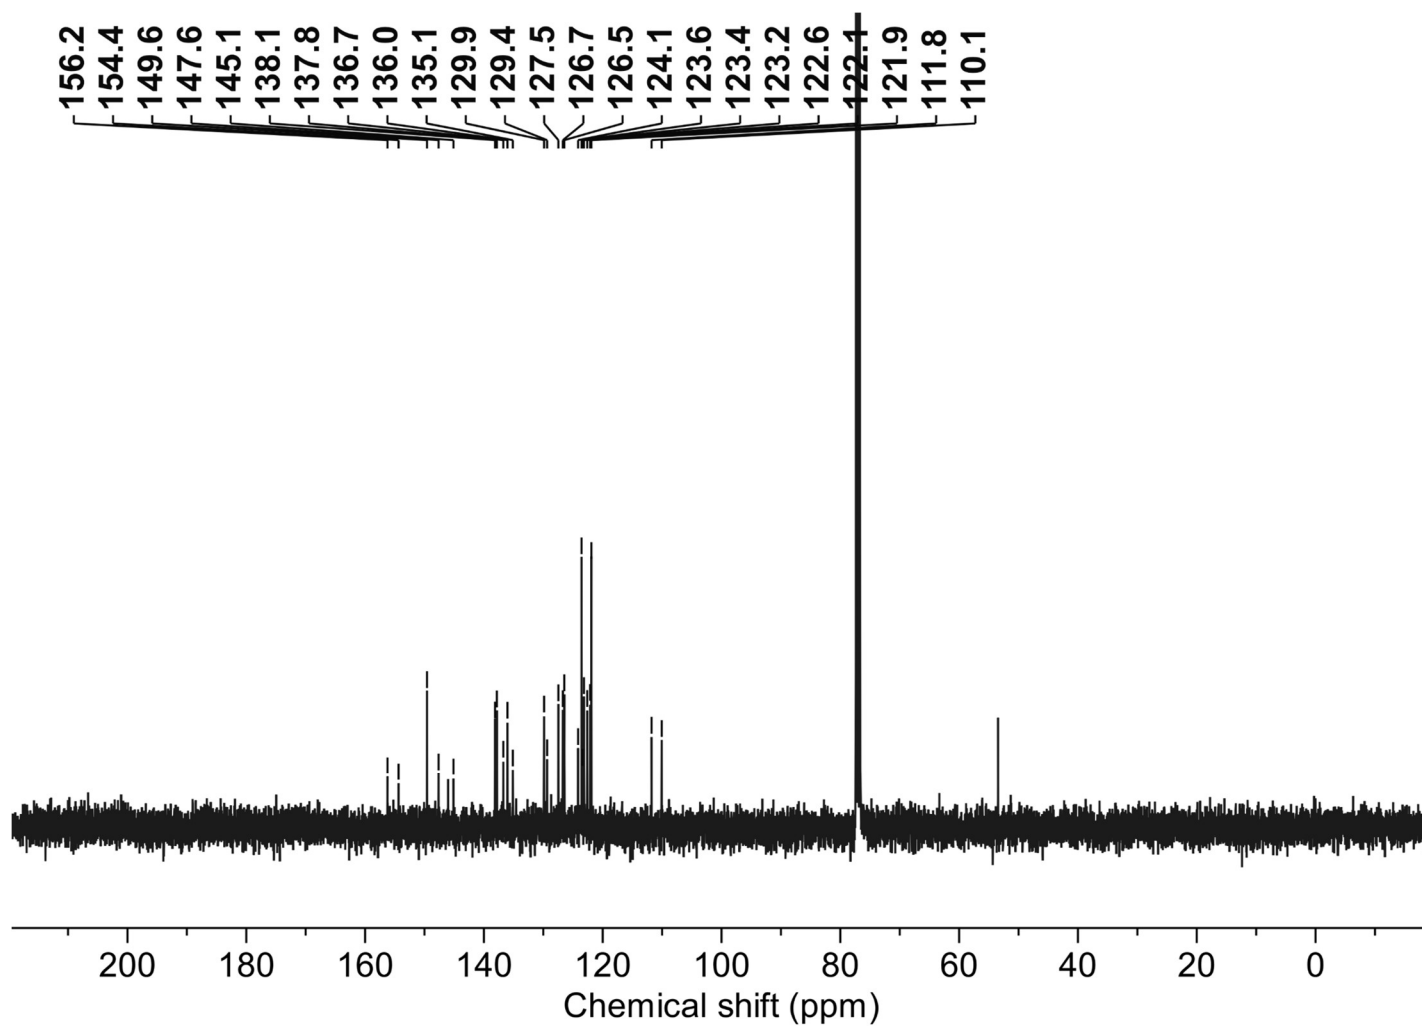

$N^1, N^4$ -di(1,10-phenanthrolin-2-yl)benzene-1,4-diamine (**22a**):  $^1\text{H}$  NMR (400 MHz,  $\text{DMSO-}d_6$ )

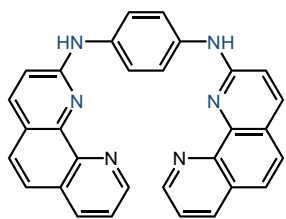

**22a**

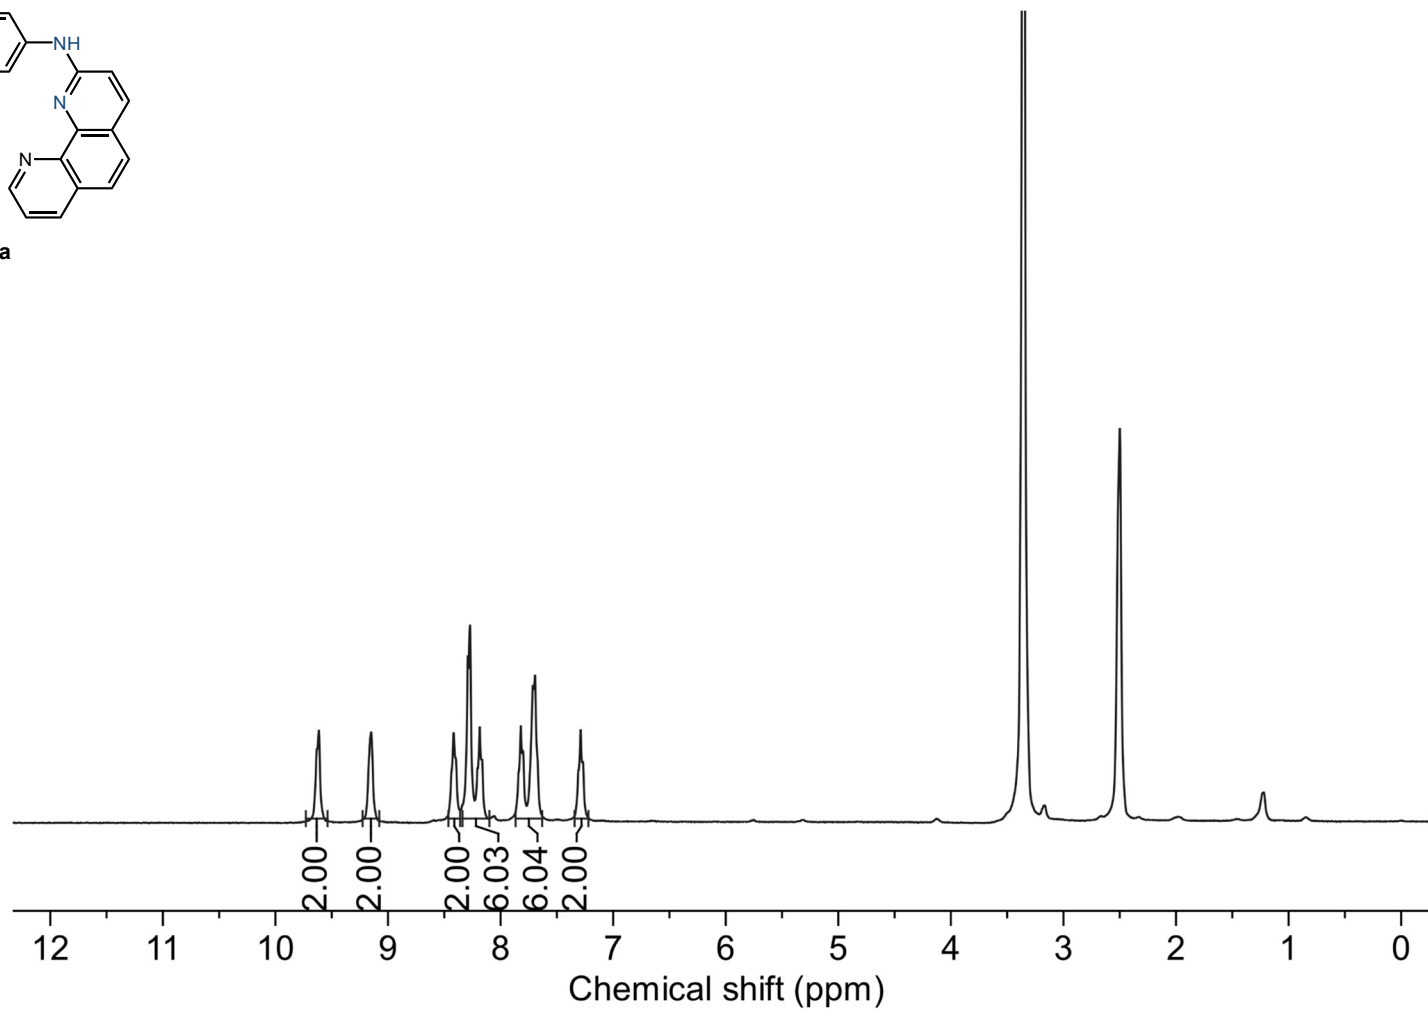

$^{13}\text{C}$  NMR (100 MHz, DMSO- $d_6$ )

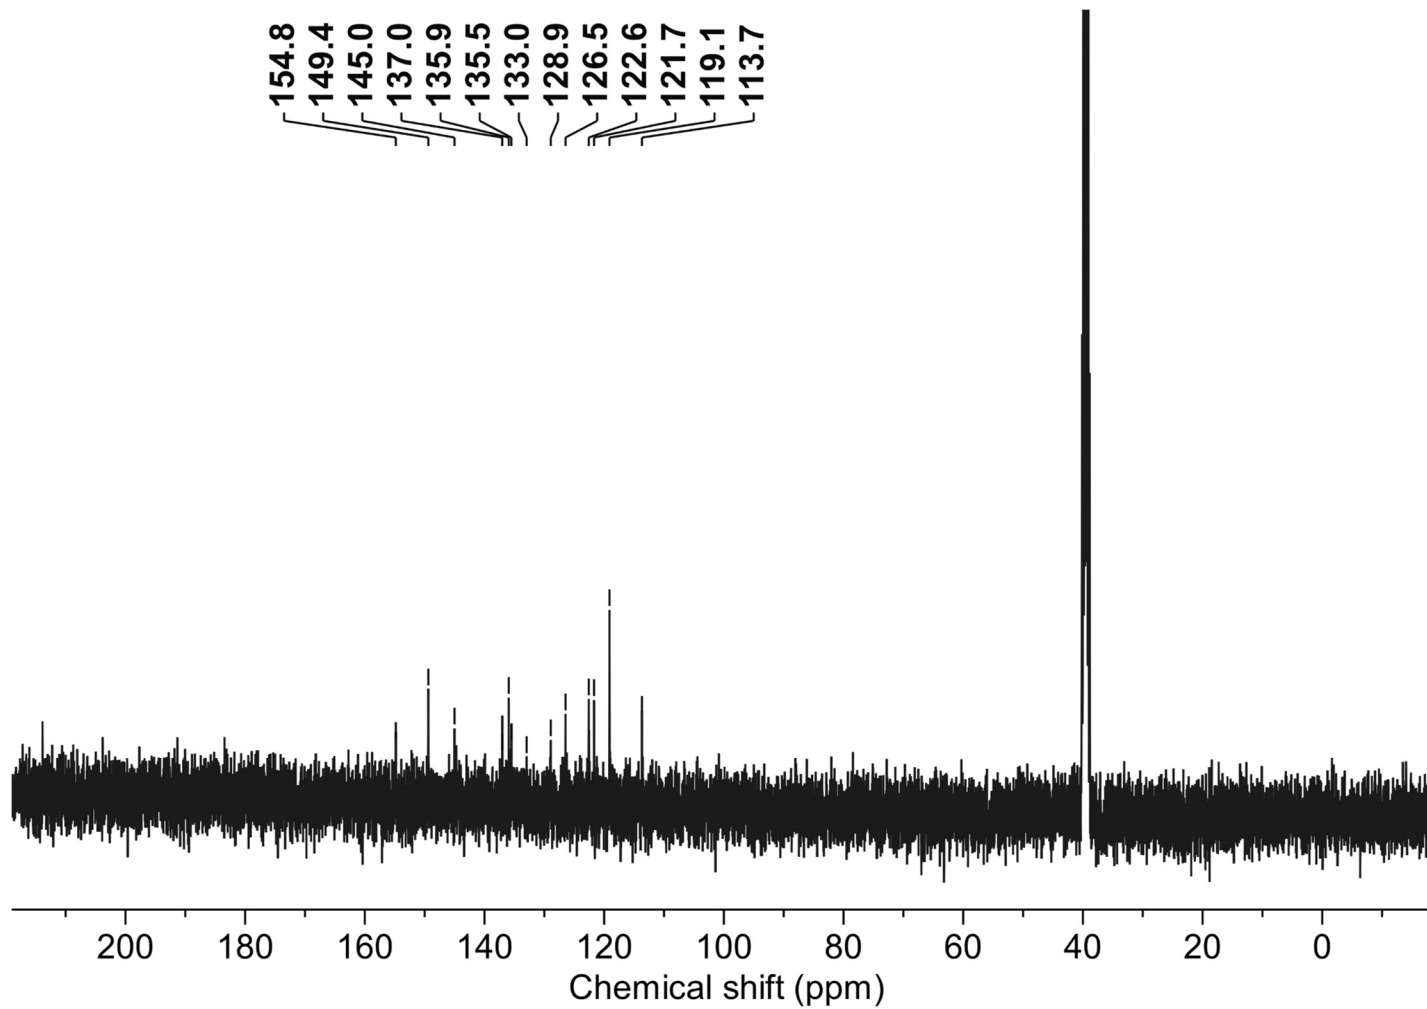

**2,2'-(1,4-phenylenebis(azanediyl))bis(*N*-((*S*)-1-phenylethyl)quinoline-4-carboxamide) (23a):**  $^1\text{H}$  NMR (400 MHz,  $\text{DMSO-}d_6$ )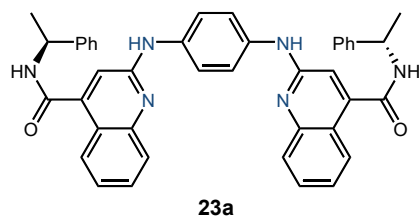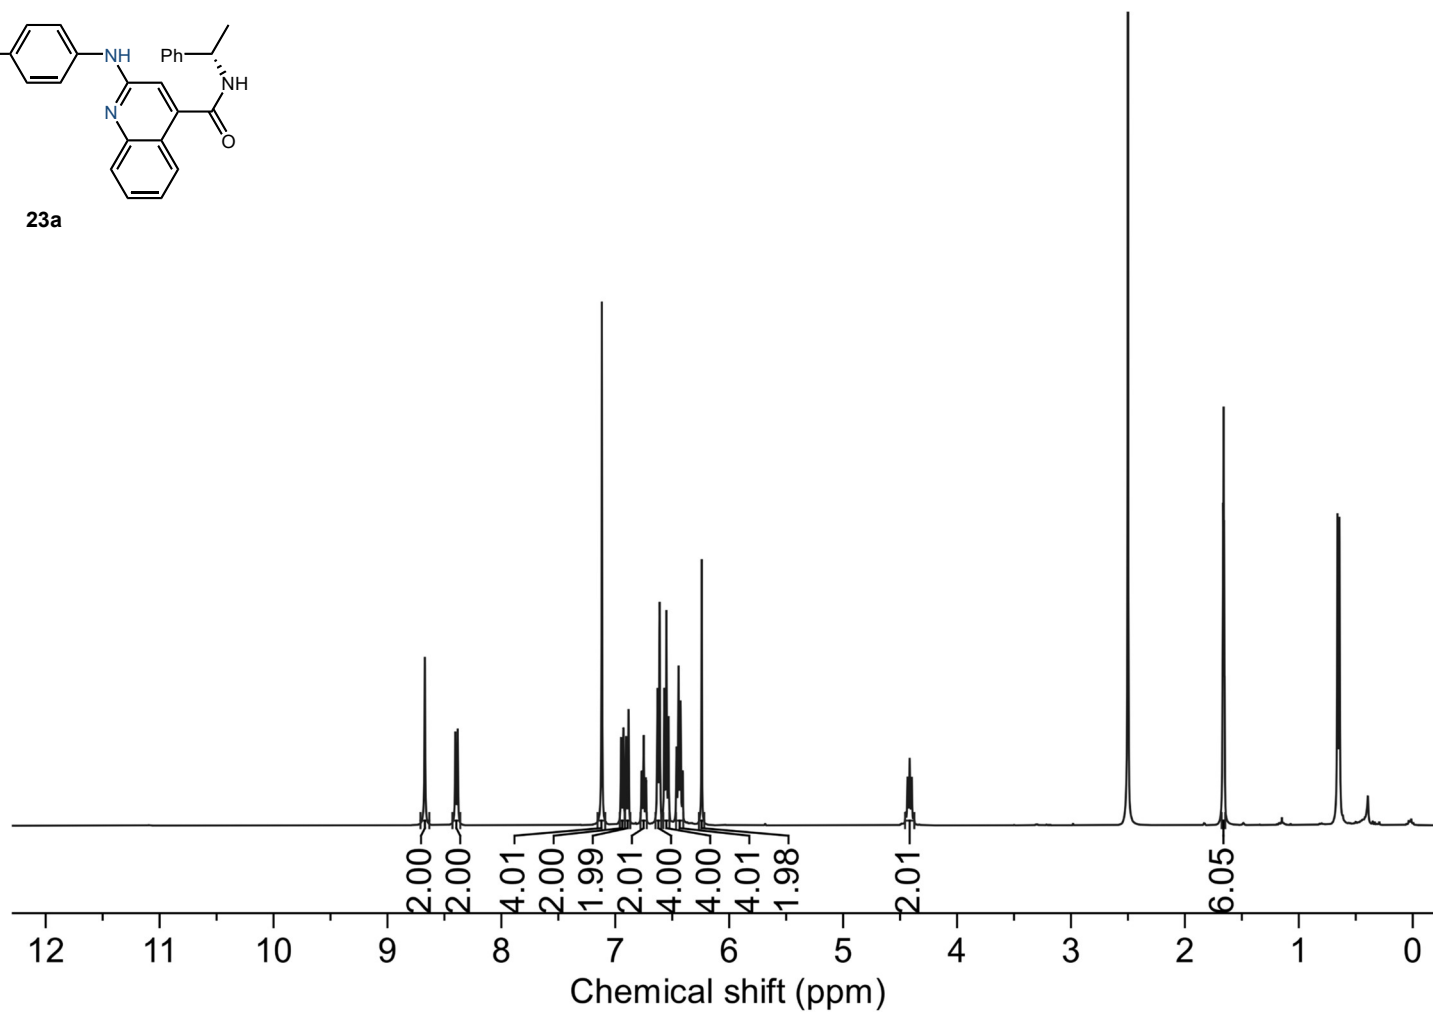

$^{13}\text{C}$  NMR (100 MHz, DMSO- $d_6$ )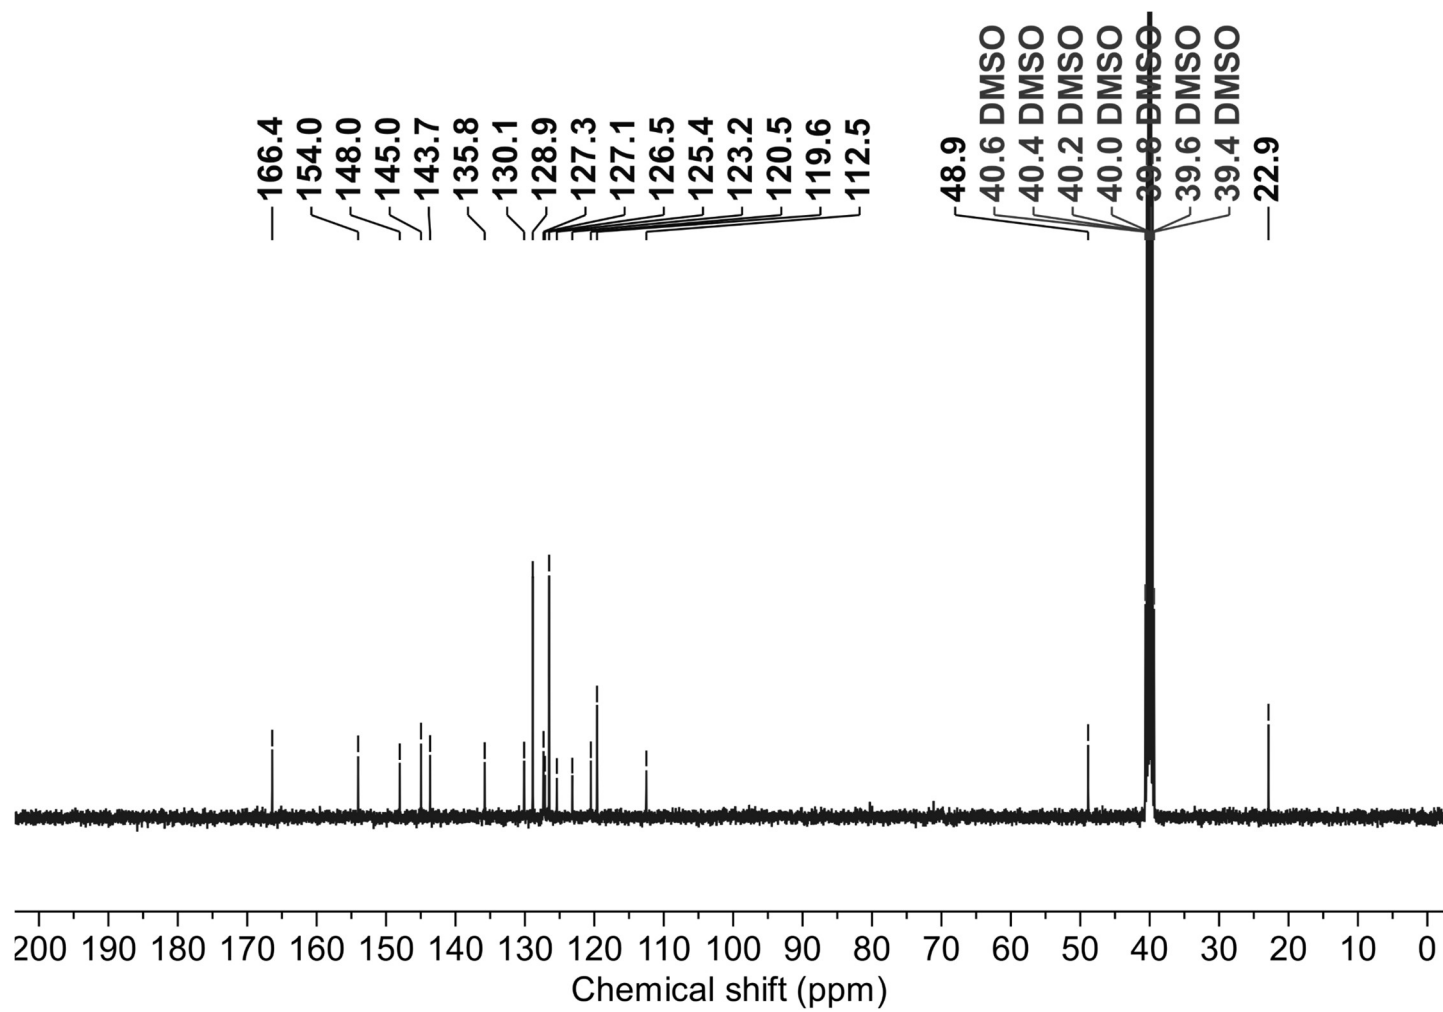

**12-methoxybenzo[4,5]imidazo[1,2-a][1,10]phenanthroline (1):  $^1\text{H}$  NMR (400 MHz,  $\text{CDCl}_3$ )**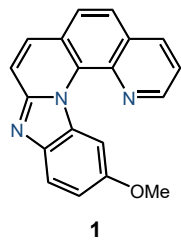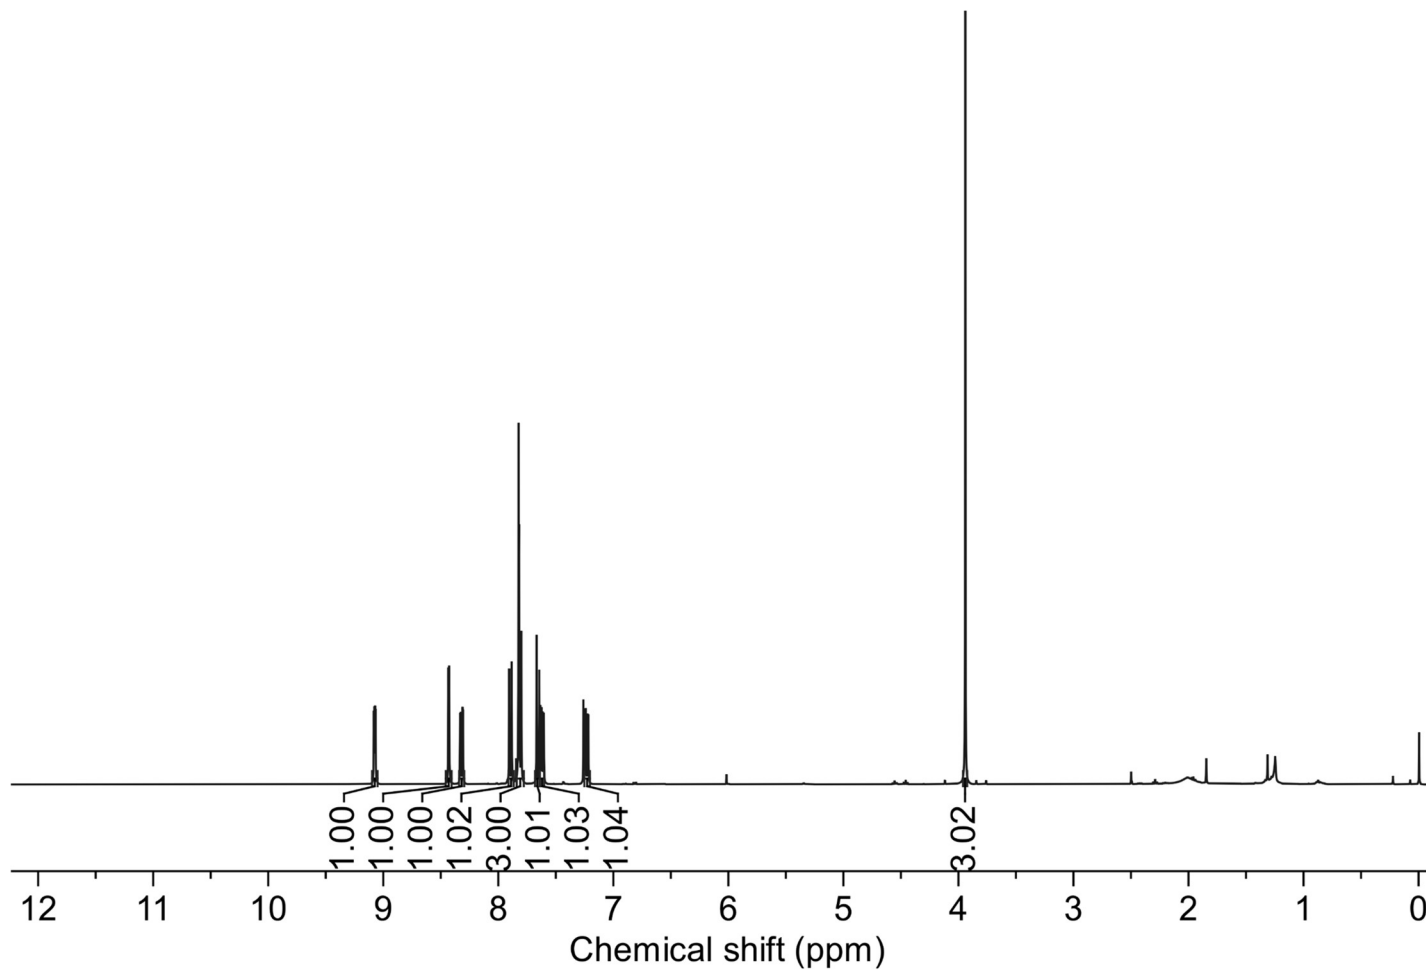

$^{13}\text{C}$  NMR (100 MHz,  $\text{CDCl}_3$ )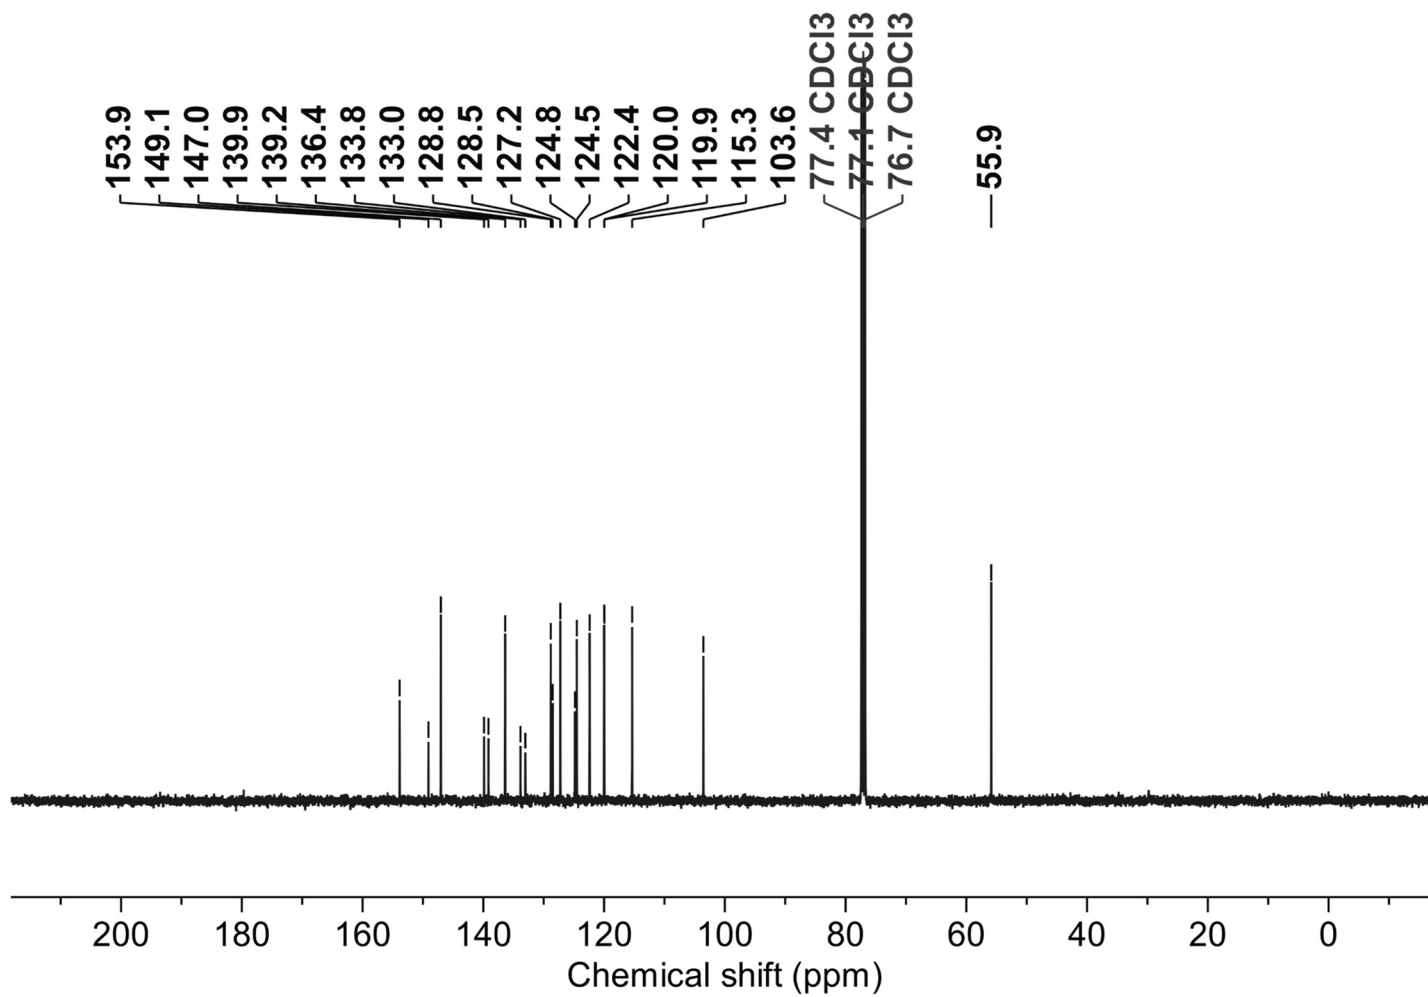

**Benzo[4,5]imidazo[1,2-a][1,10]phenanthroline-12-carbonitrile (2):  $^1\text{H}$  NMR (400 MHz,  $\text{CDCl}_3$ )**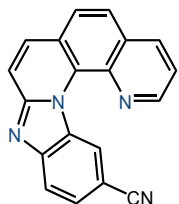**2**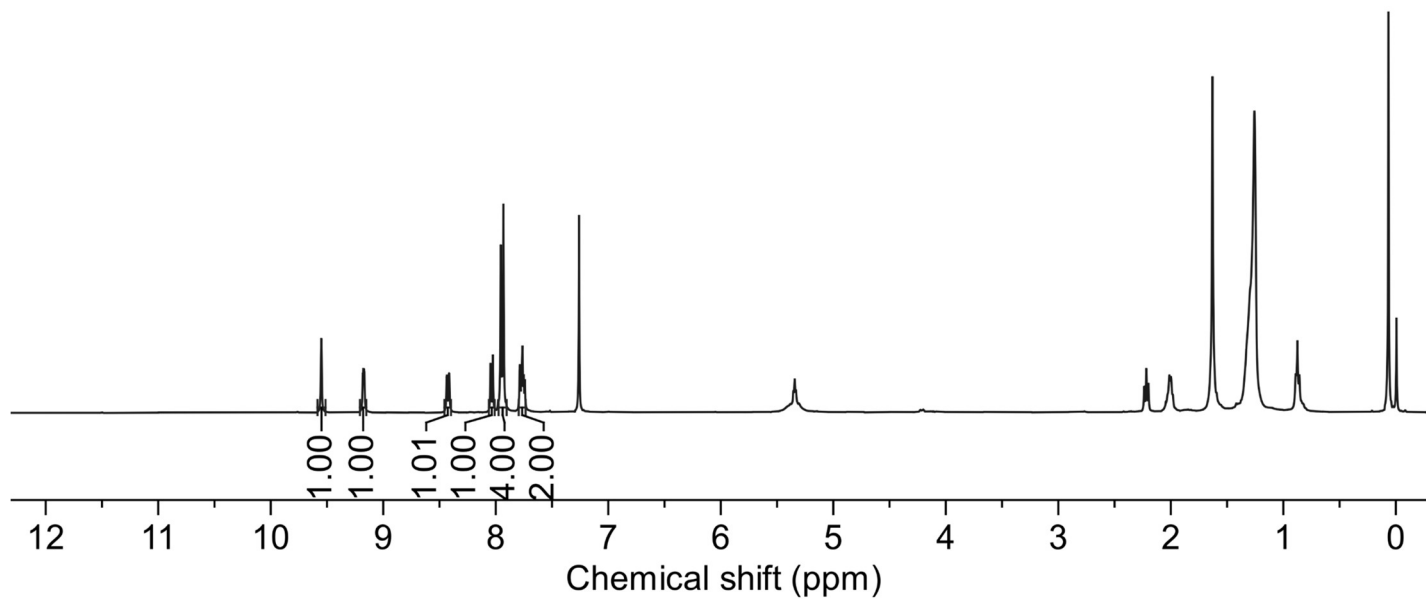

$^{13}\text{C}$  NMR (100 MHz,  $\text{CDCl}_3$ )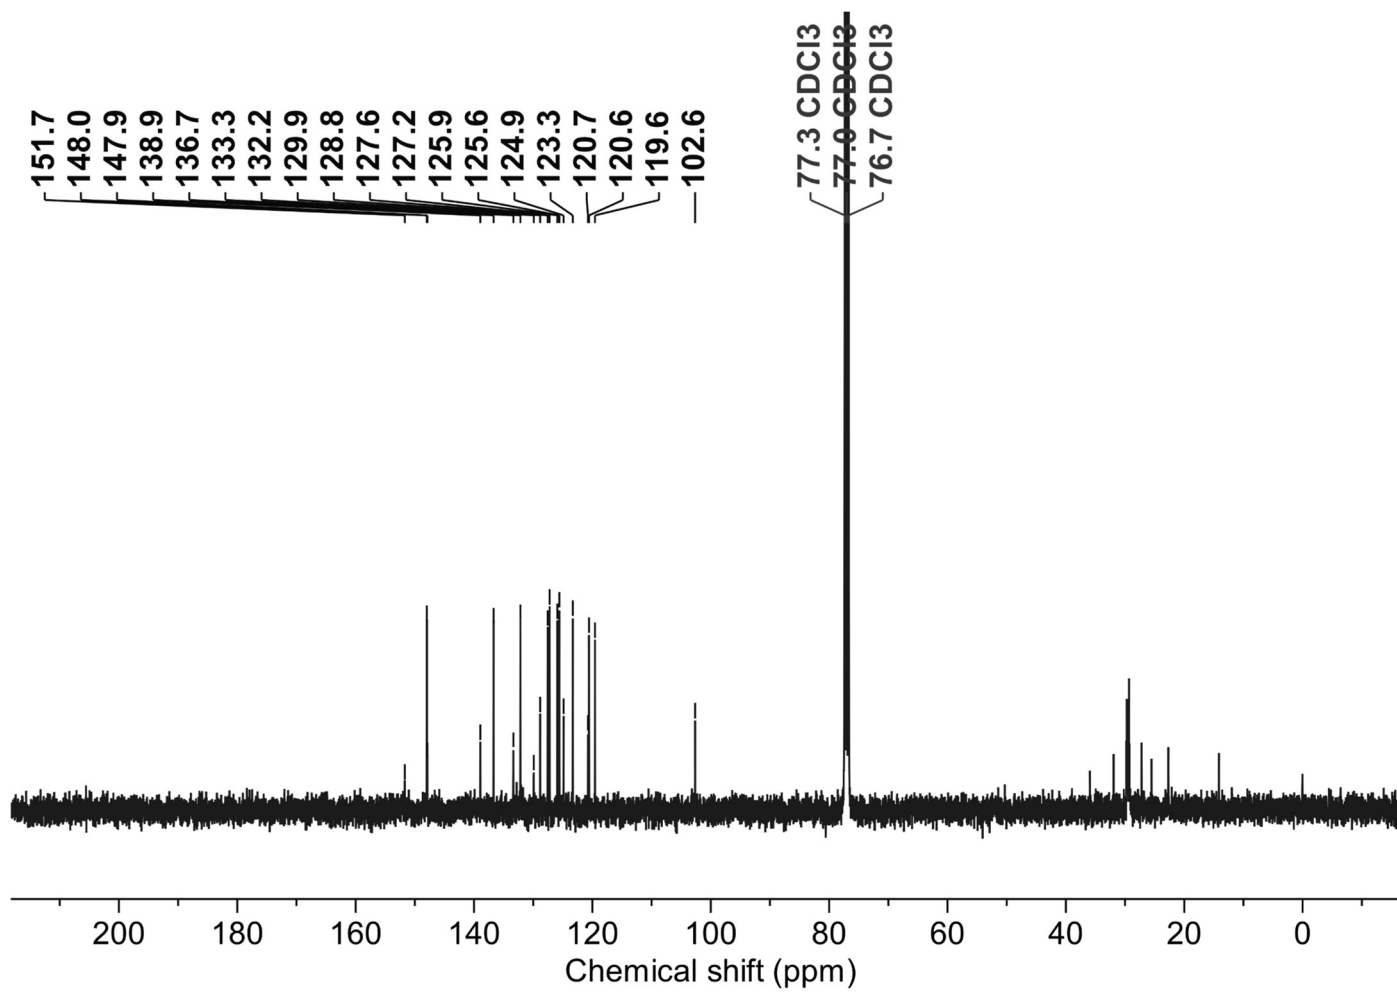

**Quinolino[8',7':4,5]imidazo[1,2-a][1,10]phenanthroline (3):  $^1\text{H}$  NMR (400 MHz,  $\text{CDCl}_3$ )**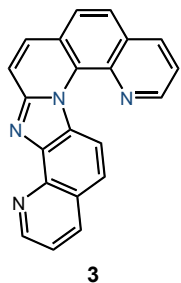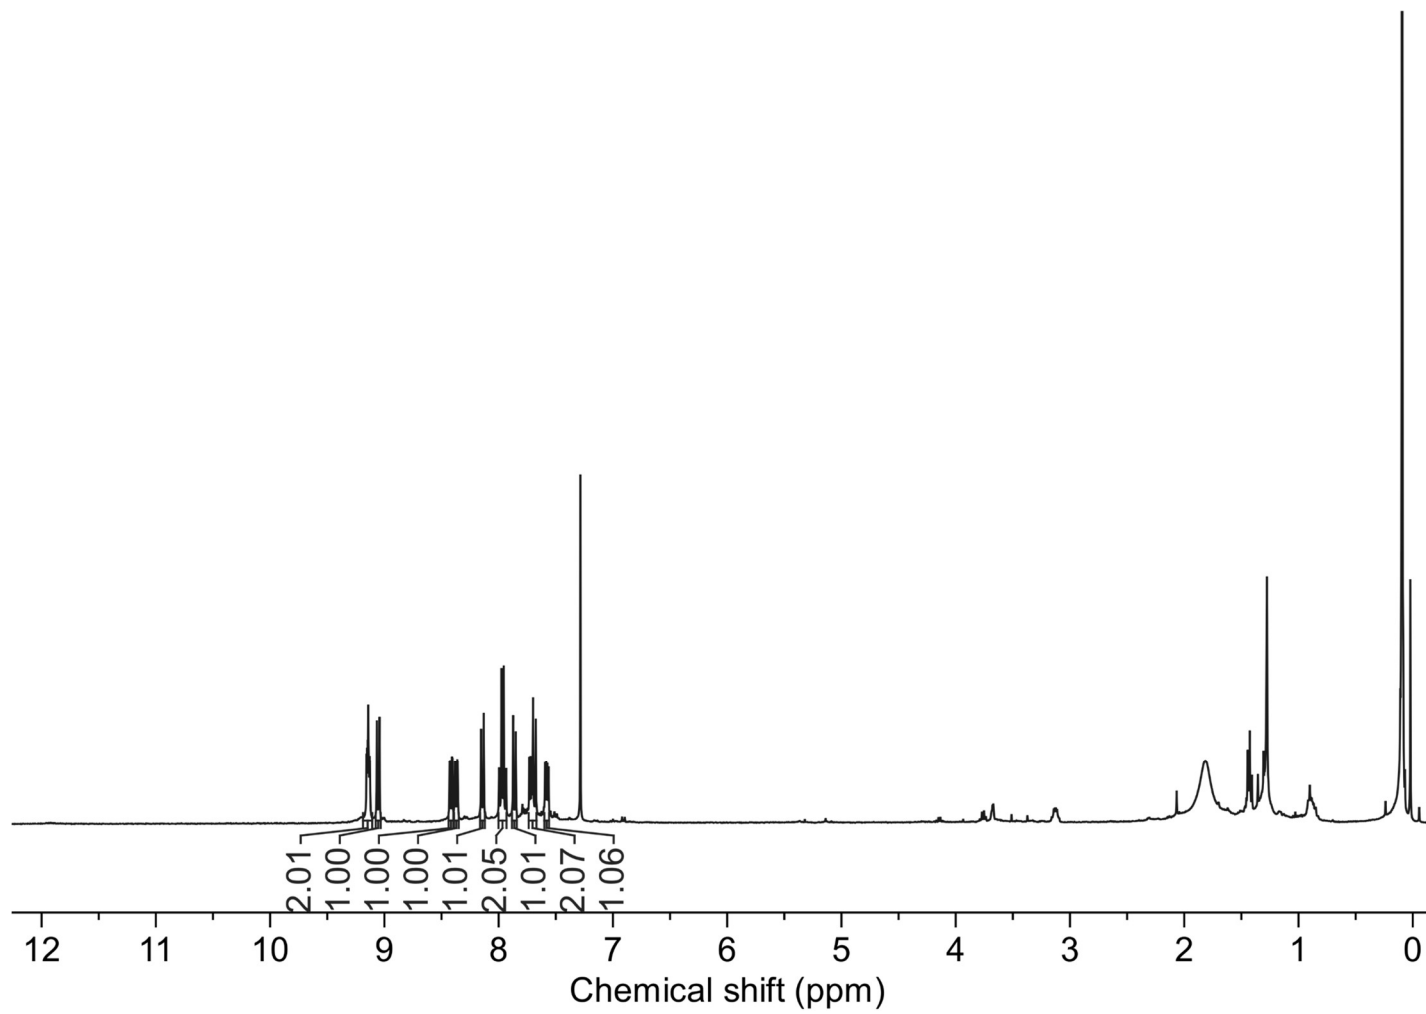

$^{13}\text{C}$  NMR (100 MHz,  $\text{CDCl}_3$ )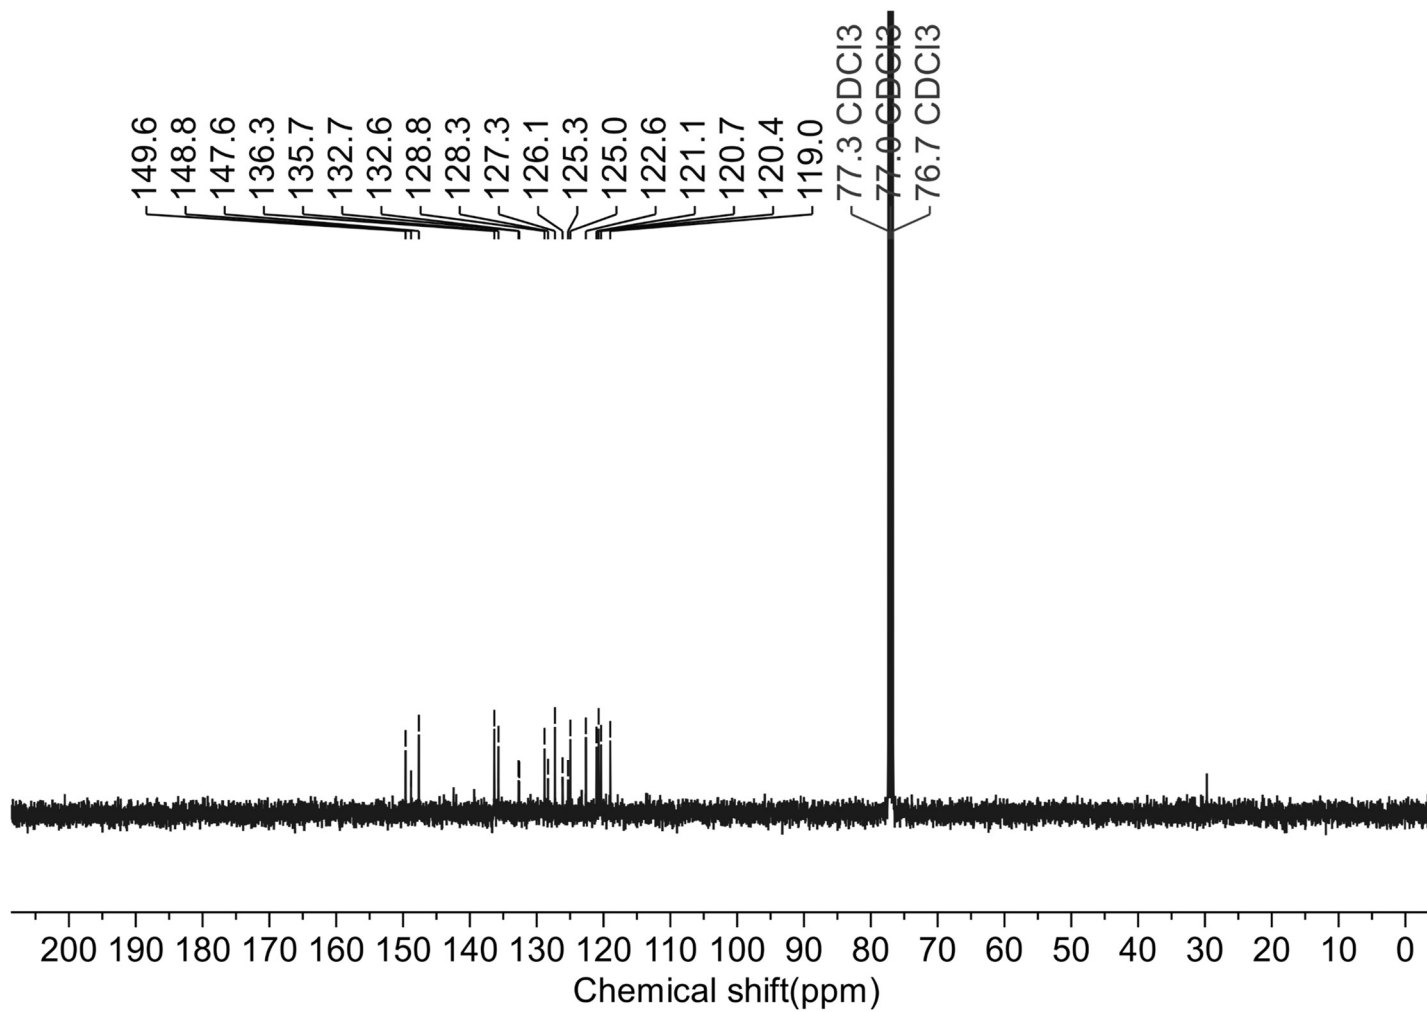

Benzo[4,5]imidazo[1,2-*a*]benzo[4,5]imidazo[2,1-*k*][1,10]phenanthroline (4):  $^1\text{H}$  NMR (400 MHz,  $\text{DMSO-}d_6$ )

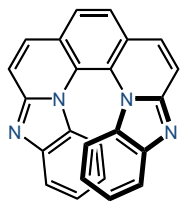

4

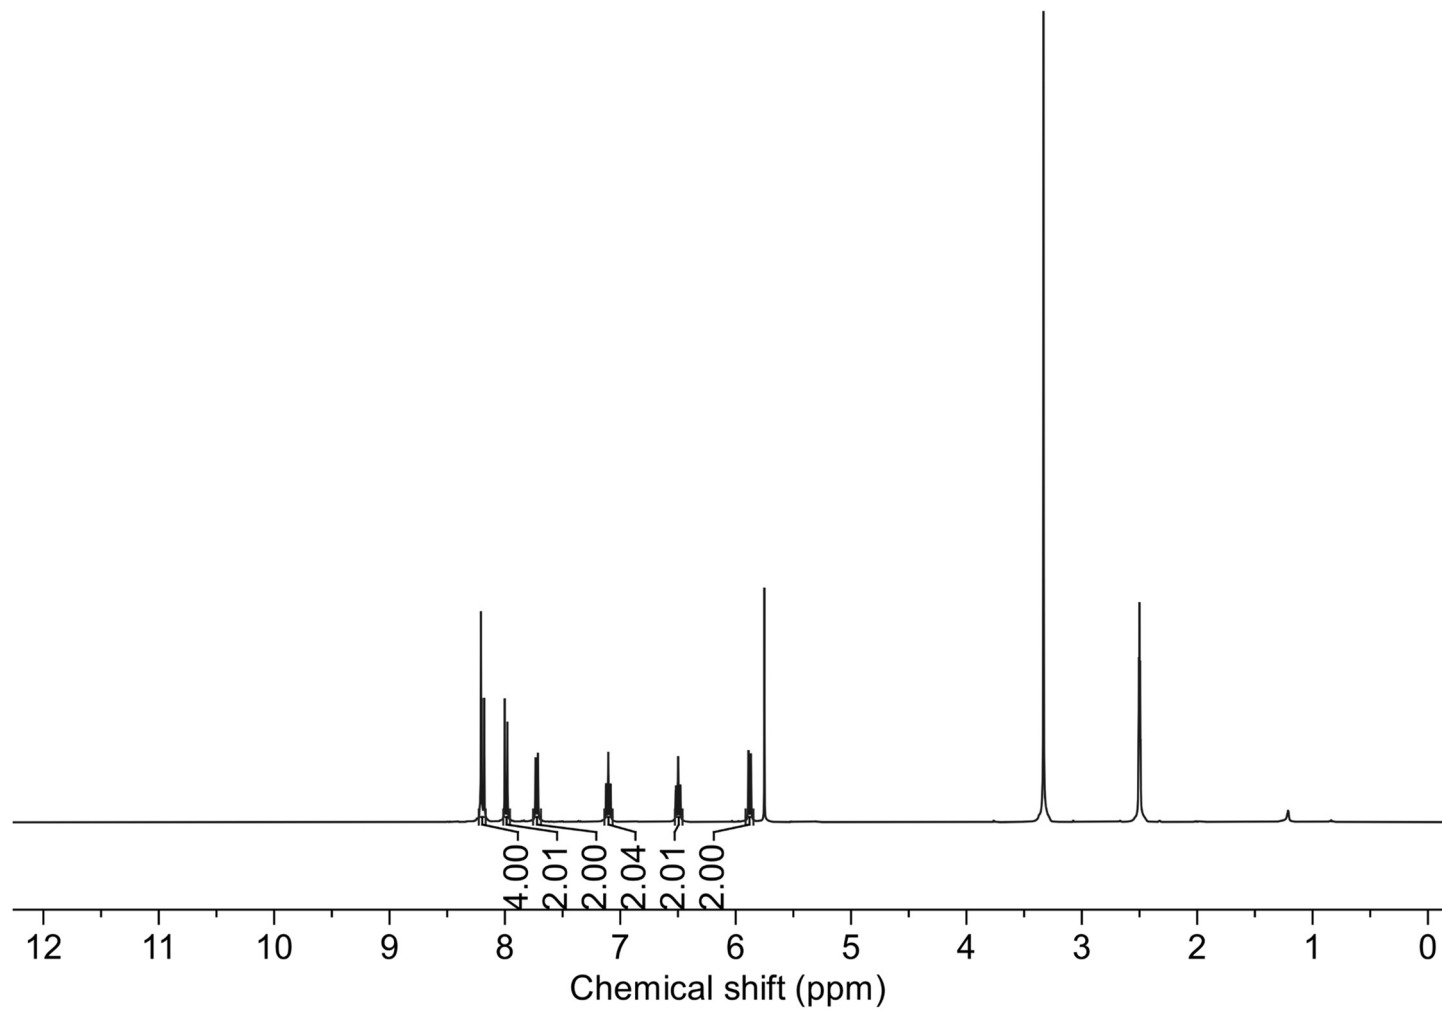

$^{13}\text{C}$  NMR (100 MHz, DMSO- $d_6$ )

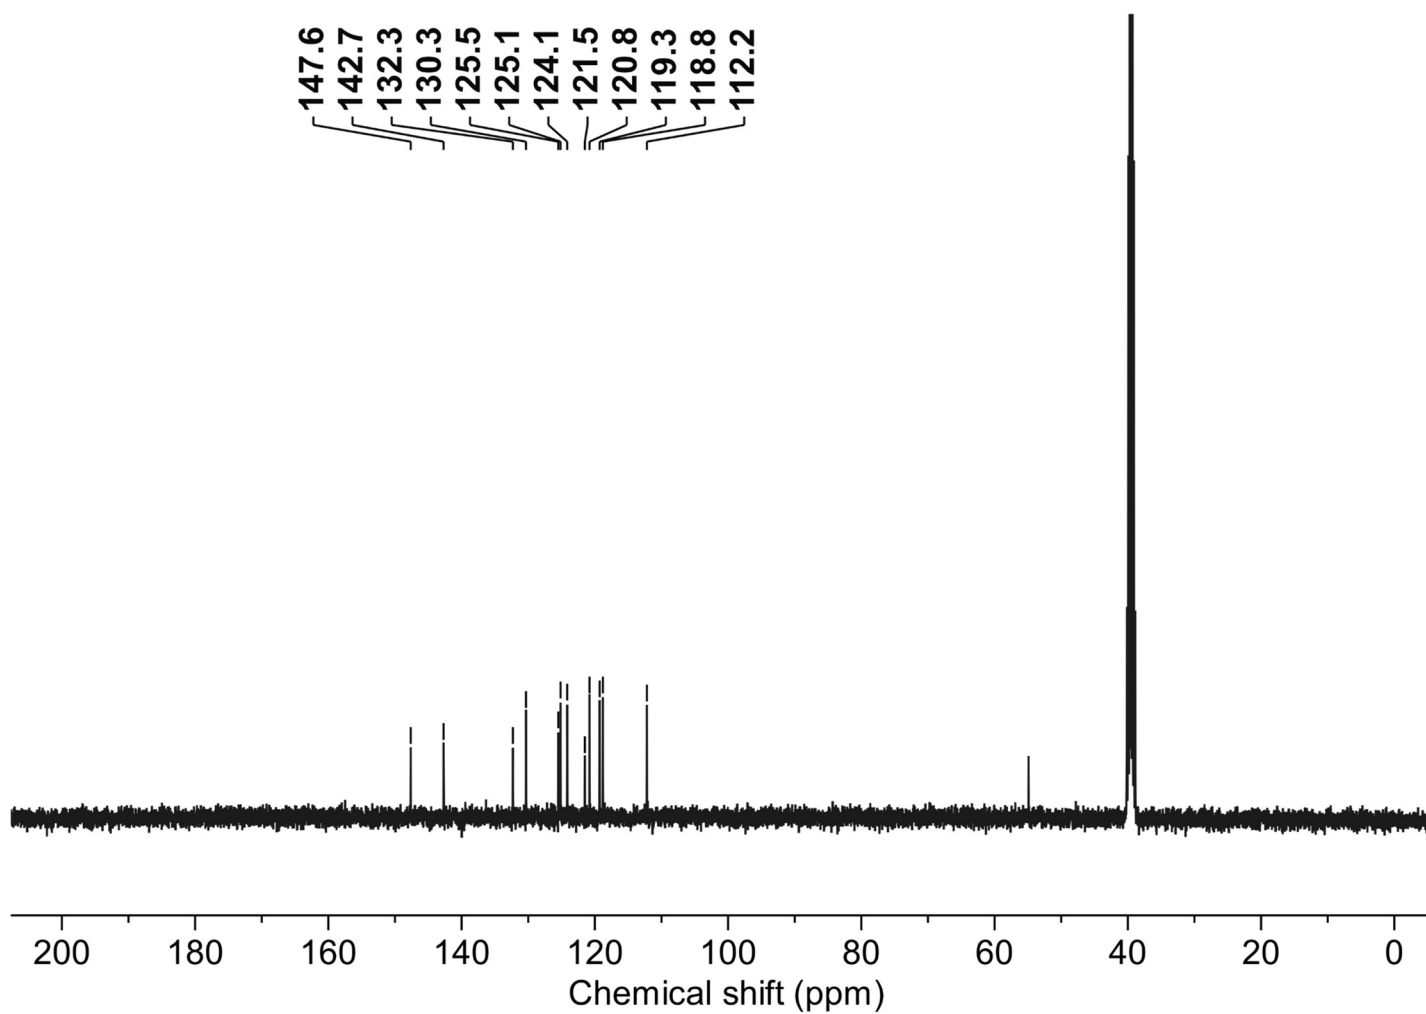

10,15-dimethoxybenzo[4,5]imidazo[1,2-*a*]benzo[4,5]imidazo[2,1-*k*][1,10]phenanthroline (5):  $^1\text{H}$  NMR (400 MHz,  $\text{DMSO-}d_6$ )

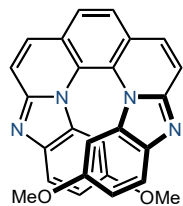

5

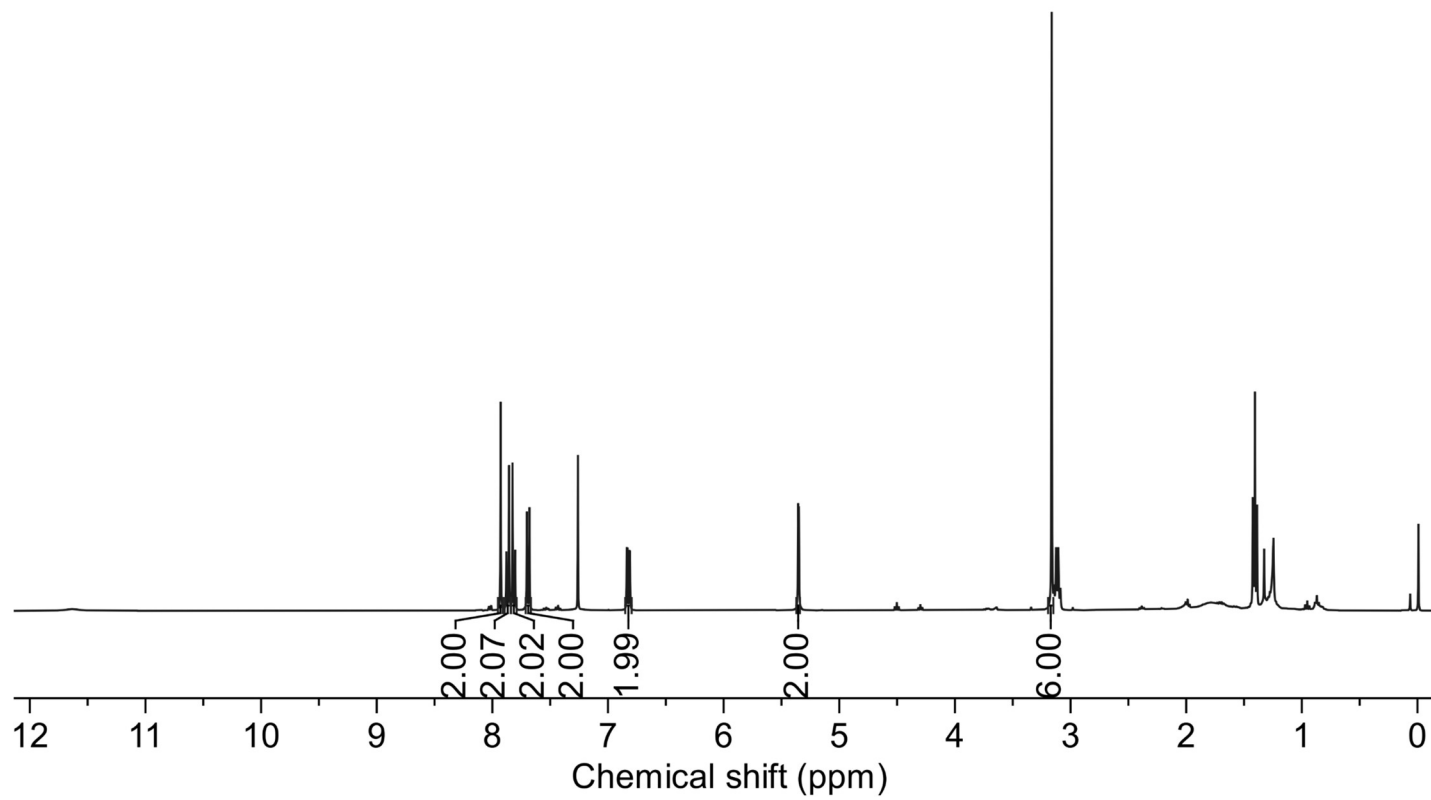

$^{13}\text{C}$  NMR (100 MHz, DMSO- $d_6$ )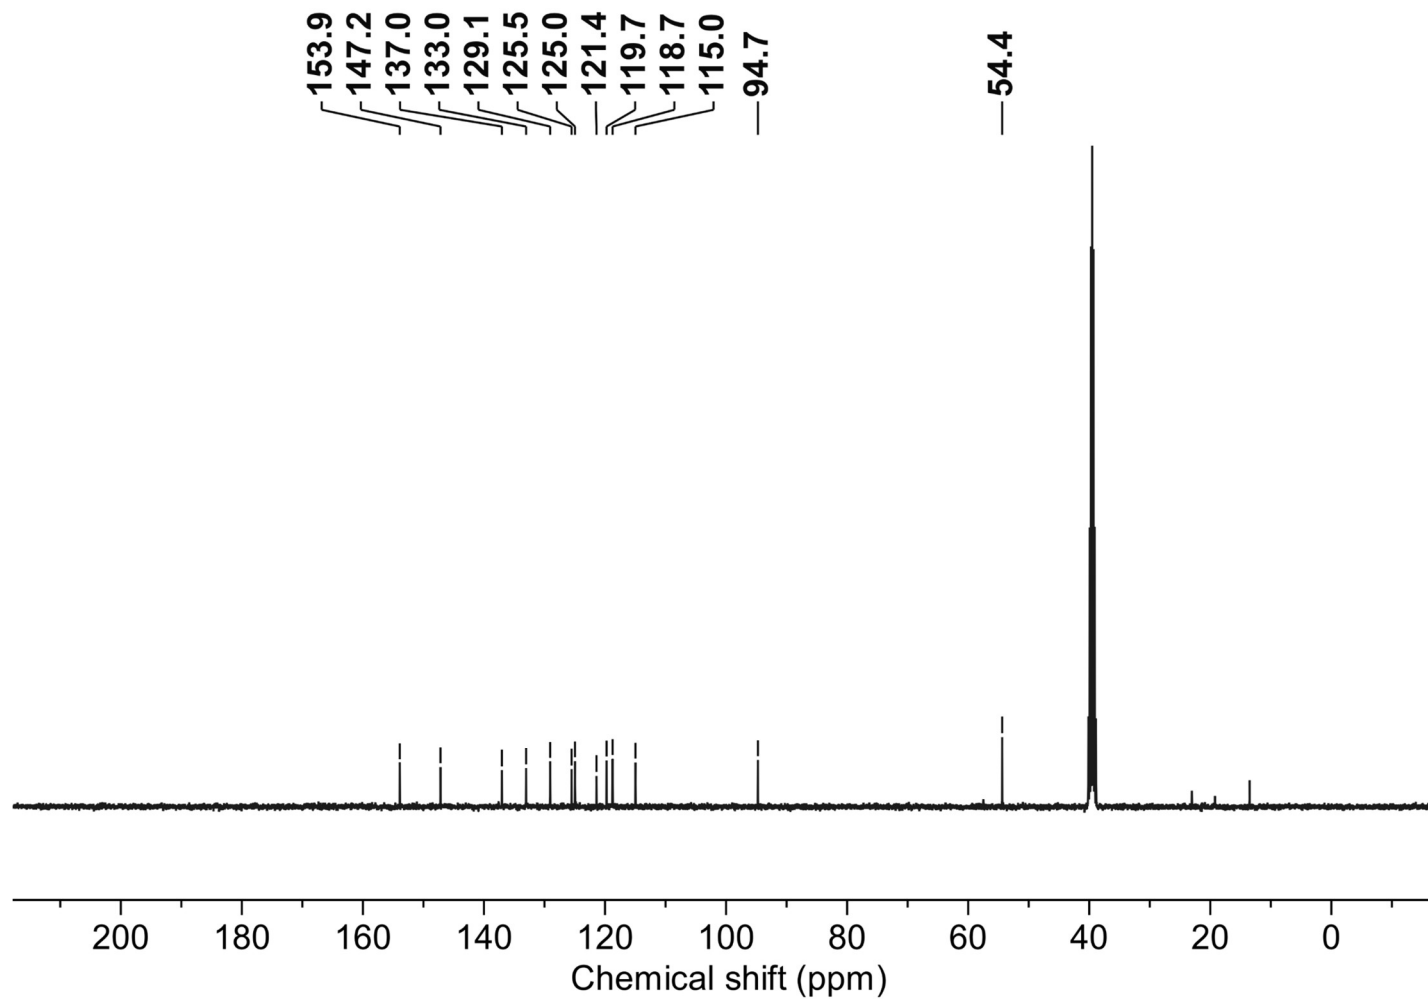

**10,15-bis(cyclopentyloxy)benzo[4,5]imidazo[1,2-a]benzo[4,5]imidazo[2,1-k][1,10]phenanthroline (6):**  $^1\text{H}$  NMR (400 MHz,  $\text{CDCl}_3$ )

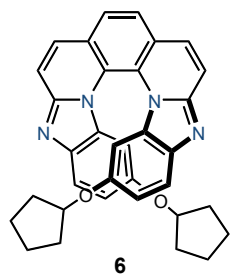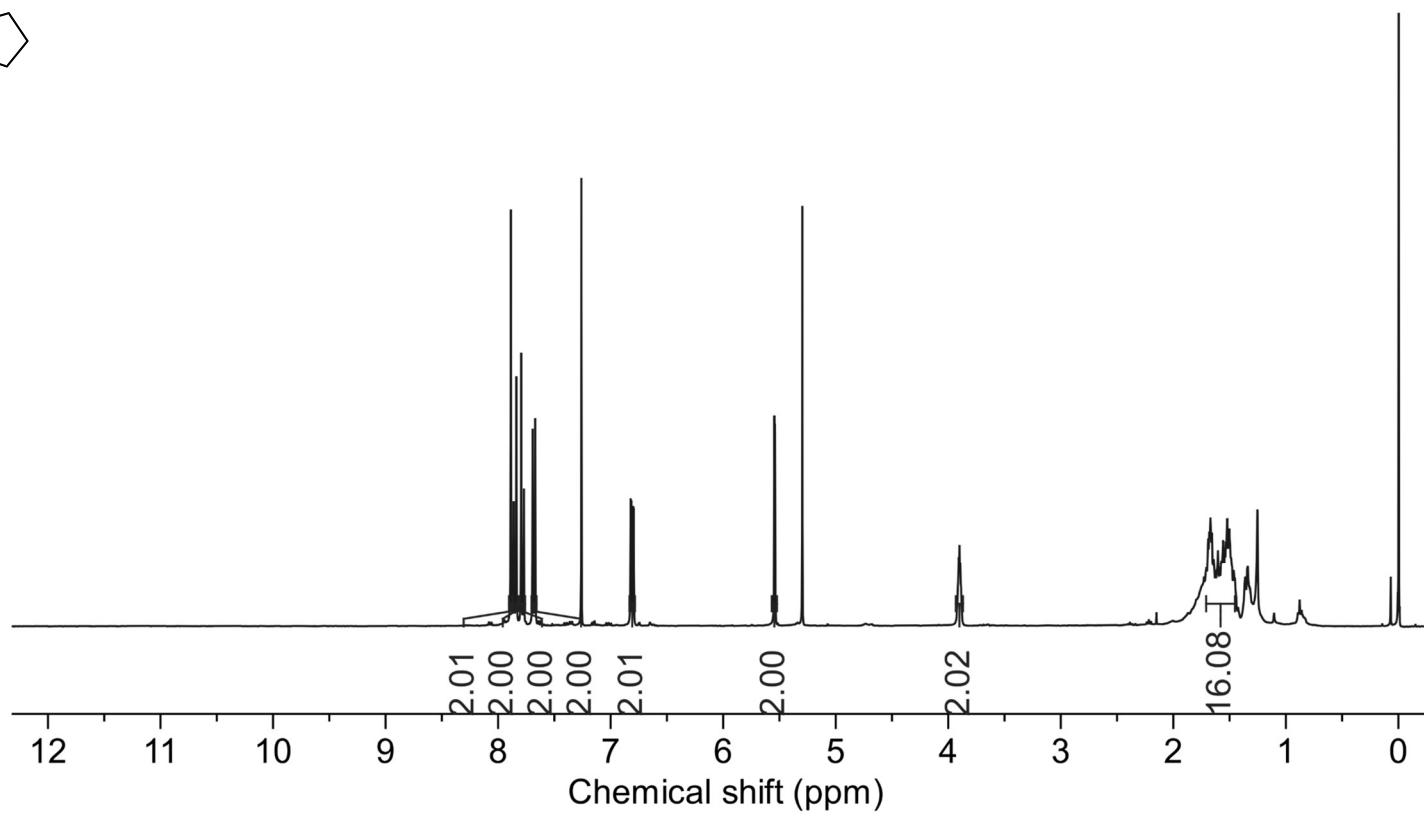

$^{13}\text{C}$  NMR (100 MHz,  $\text{CDCl}_3$ )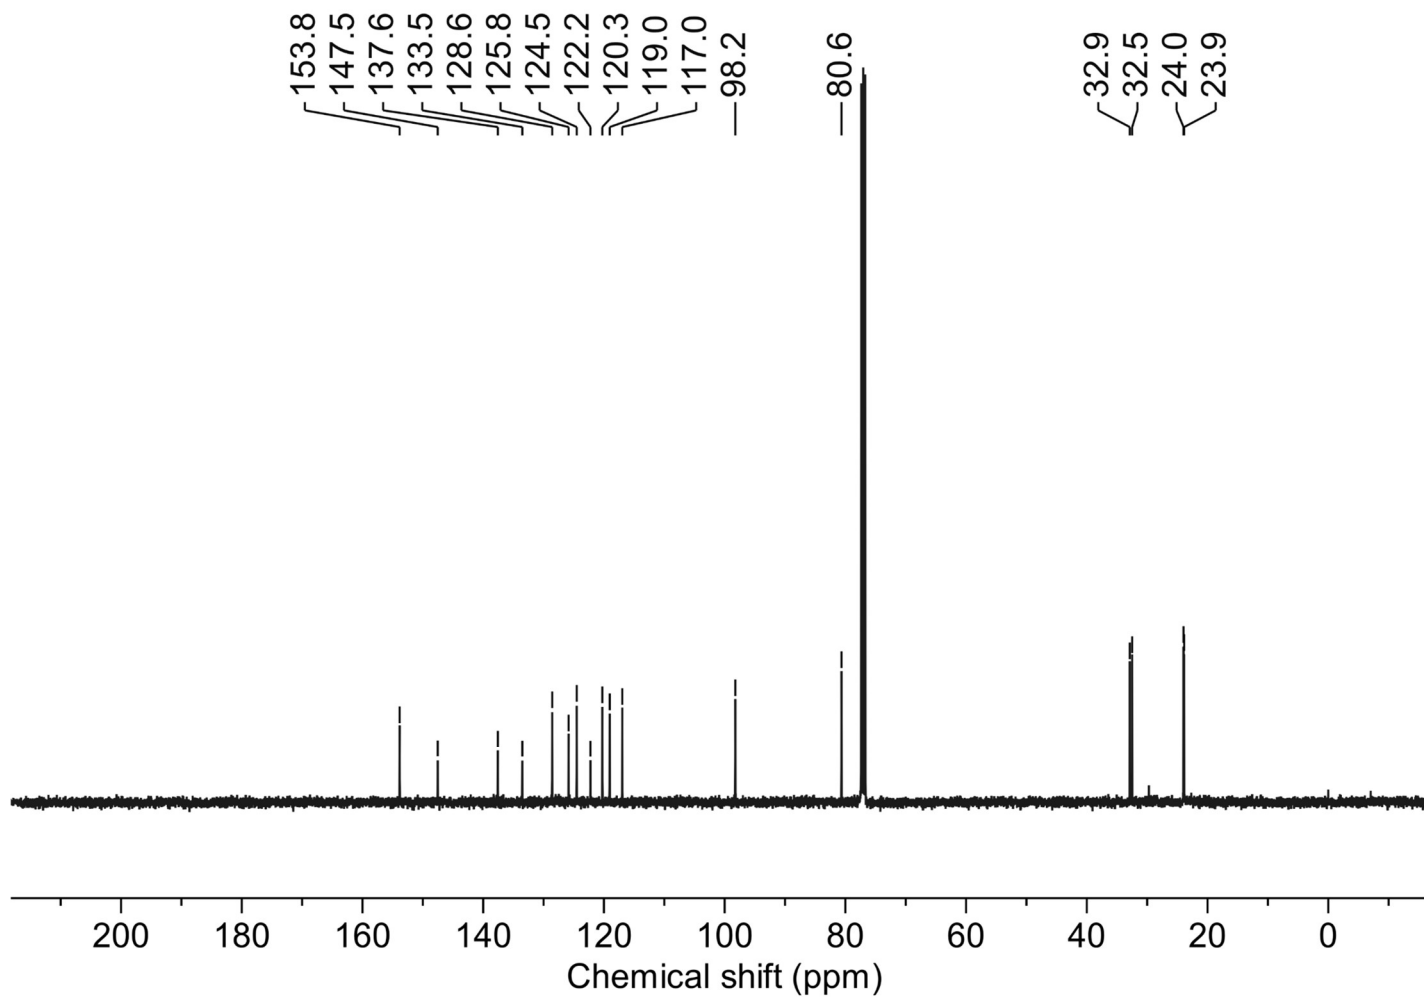

**10,15-di-*tert*-butylbenzo[4,5]imidazo[1,2-*a*]benzo[4,5]imidazo[2,1-*k*][1,10]phenanthroline (7):**  $^1\text{H}$  NMR (400 MHz,  $\text{CDCl}_3$ )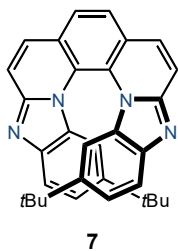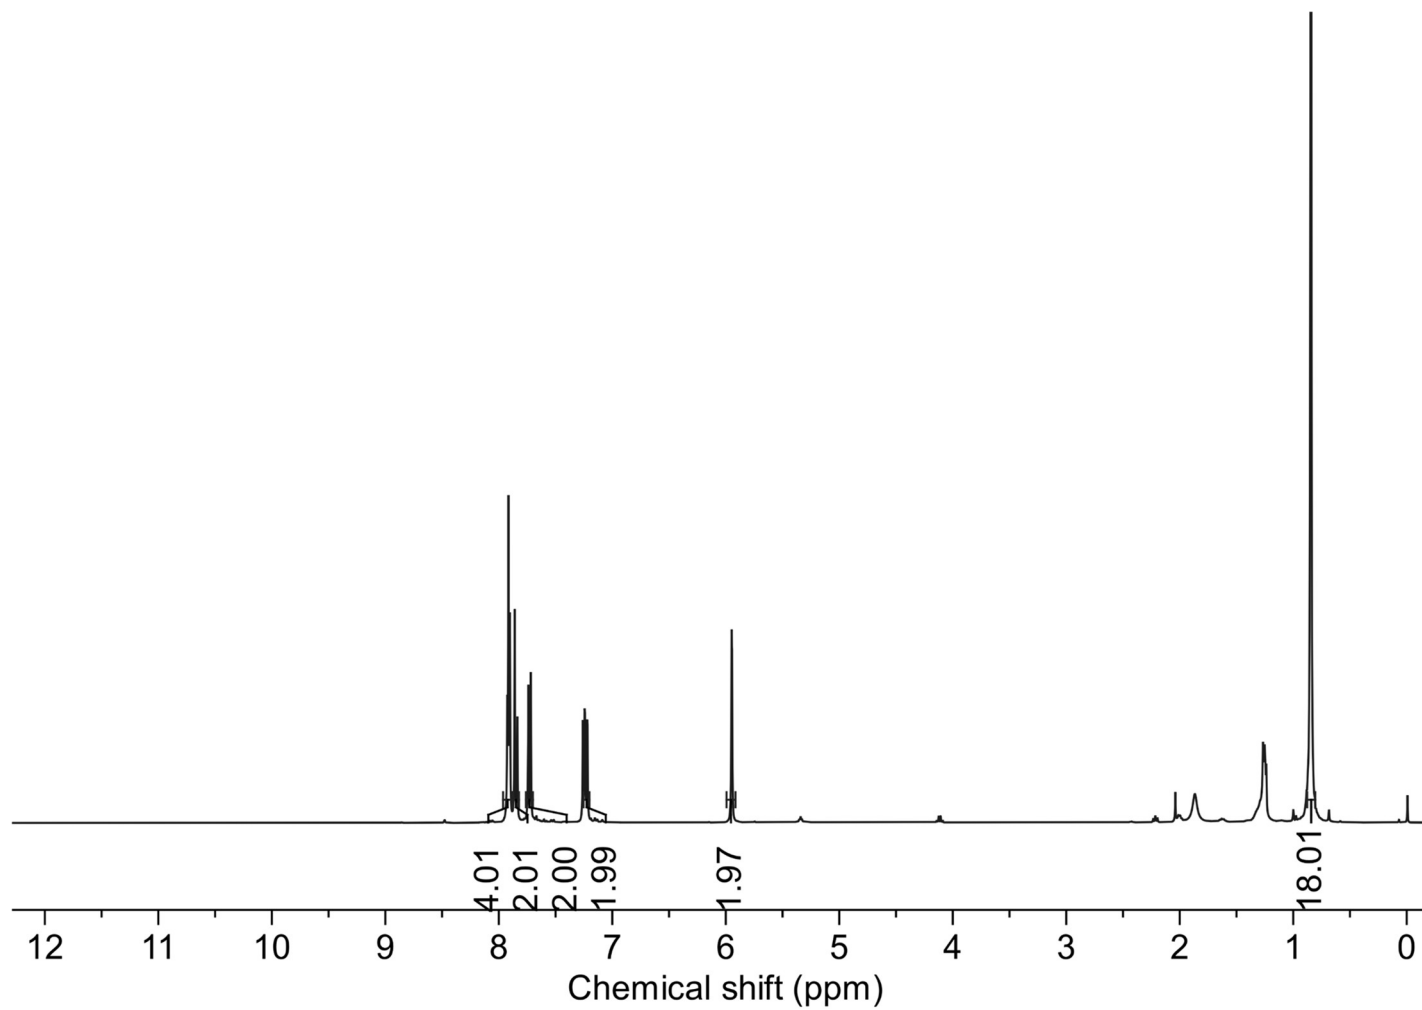

$^{13}\text{C}$  NMR (100 MHz,  $\text{CDCl}_3$ )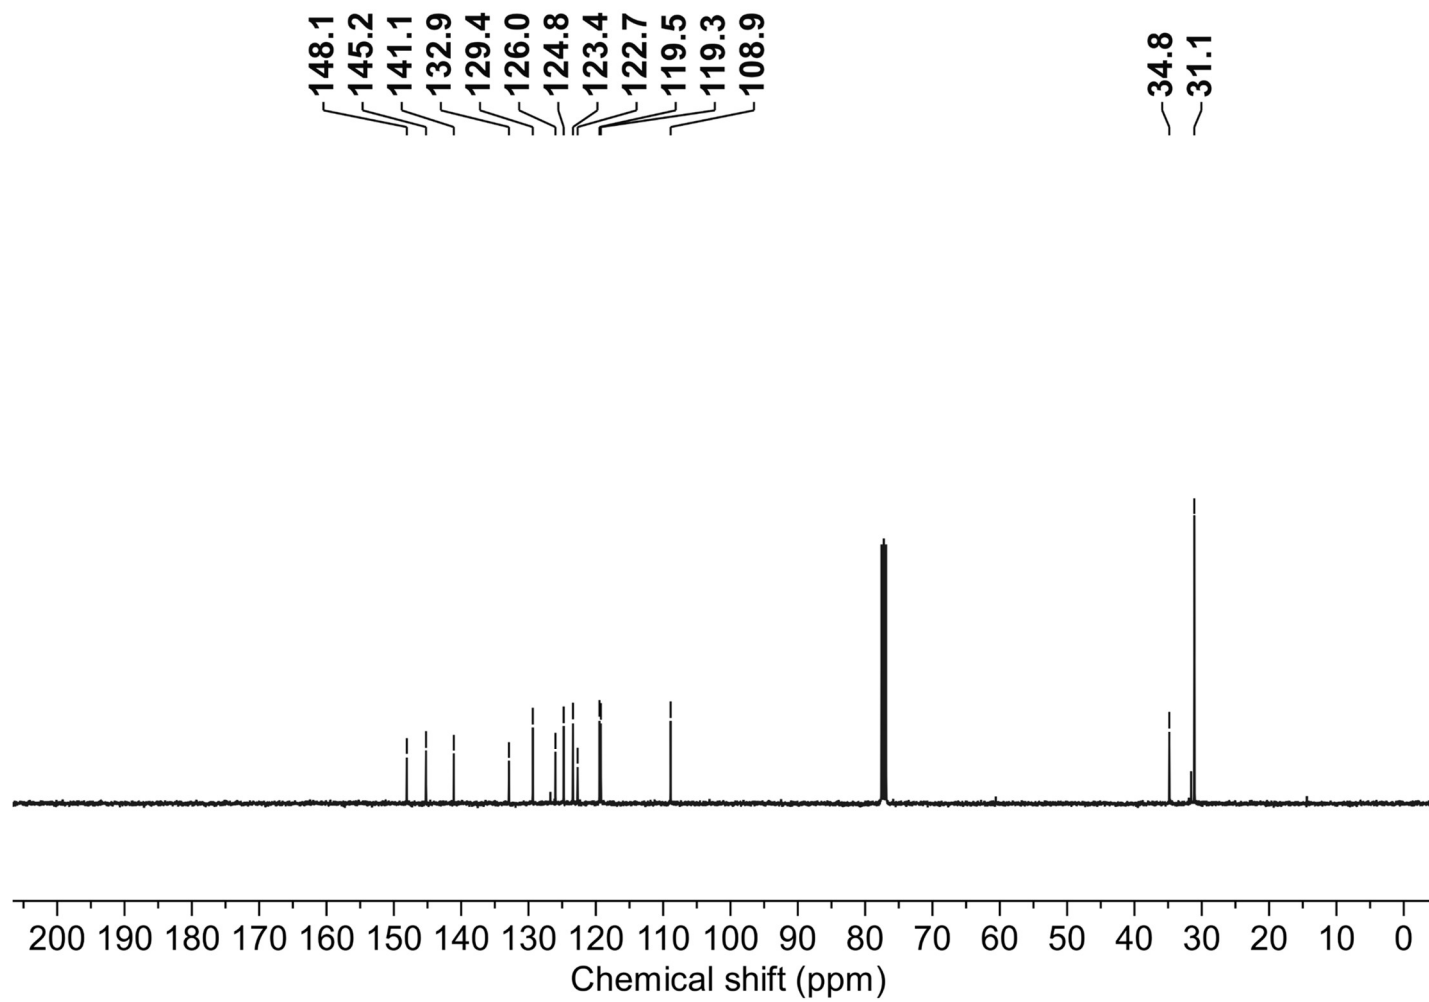

**10,15-diphenylbenzo[4,5]imidazo[1,2-a]benzo[4,5]imidazo[2,1-k][1,10]phenanthroline (8):**  $^1\text{H}$  NMR (800 MHz,  $\text{CDCl}_3$ )

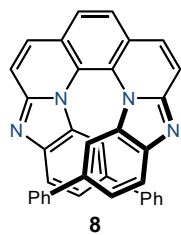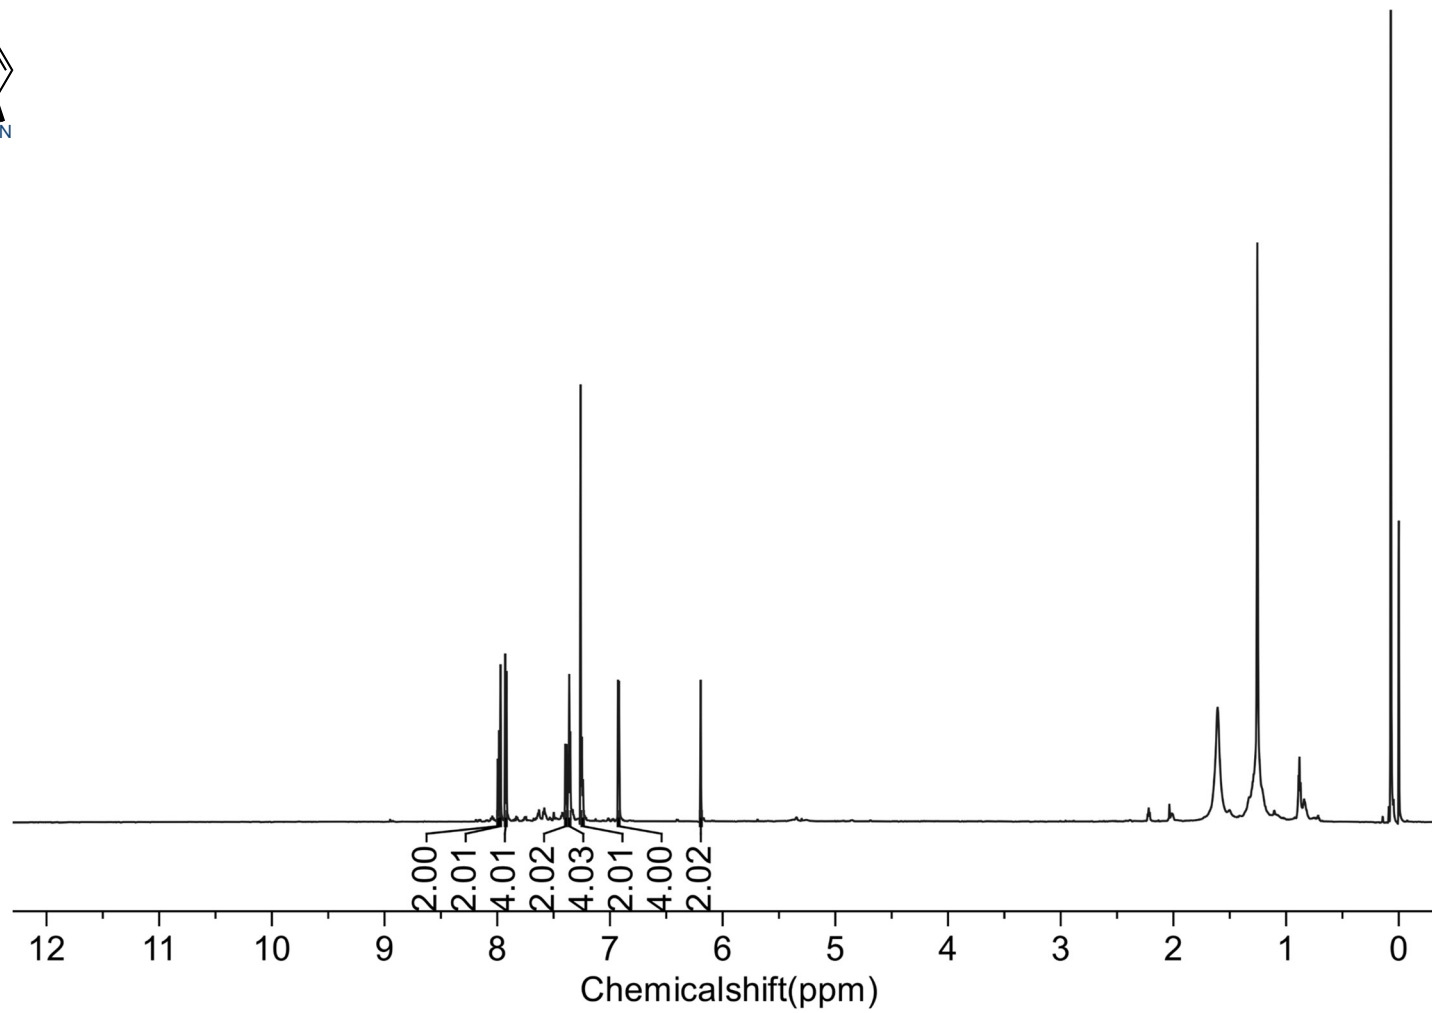

$^{13}\text{C}$  NMR (200 MHz,  $\text{CDCl}_3$ )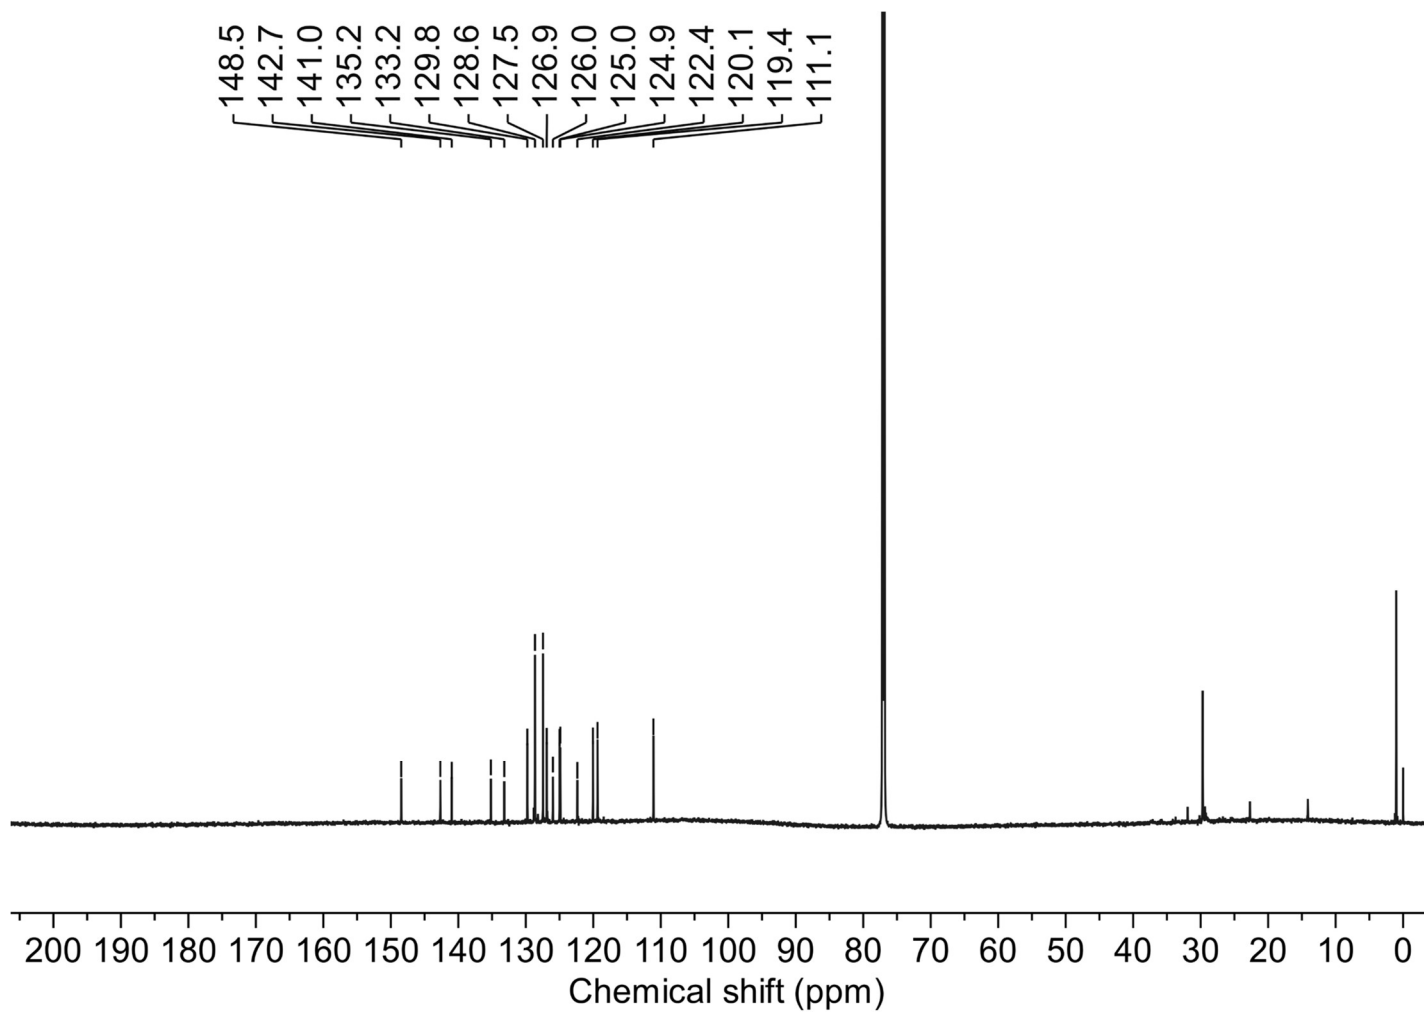

**Dimethyl benzo[4,5]imidazo[1,2-*a*]benzo[4,5]imidazo[2,1-*k*][1,10]phenanthroline-10,15-dicarboxylate (9):**  $^1\text{H}$  NMR (400 MHz,  $\text{CDCl}_3$ )

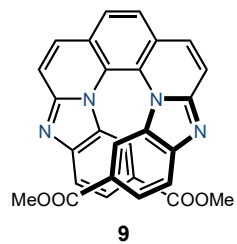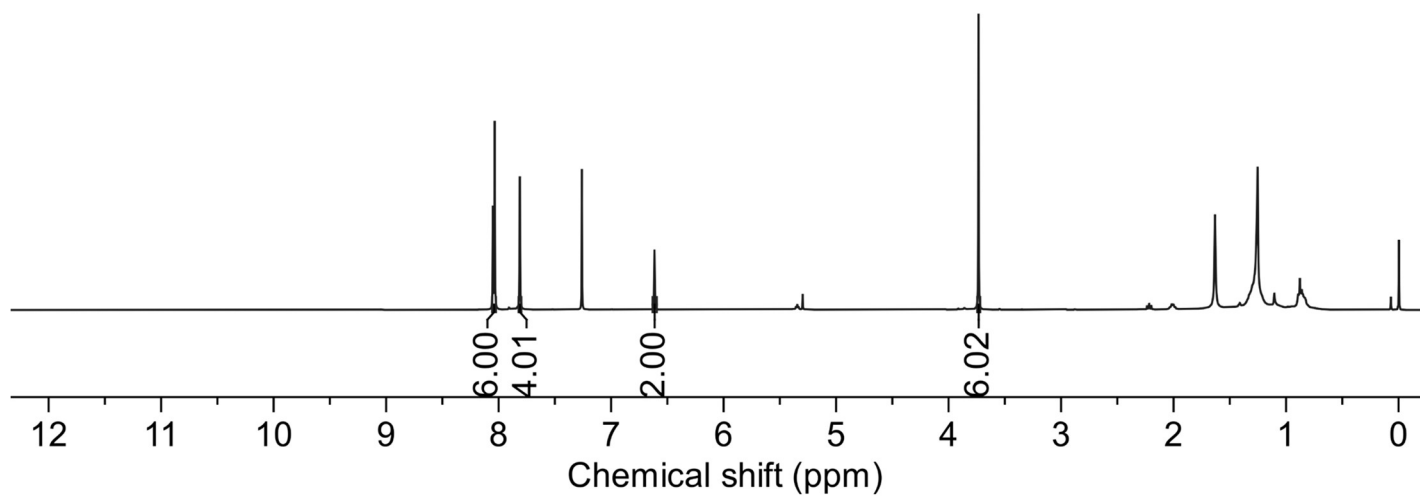

$^{13}\text{C}$  NMR (200 MHz,  $\text{CDCl}_3$ )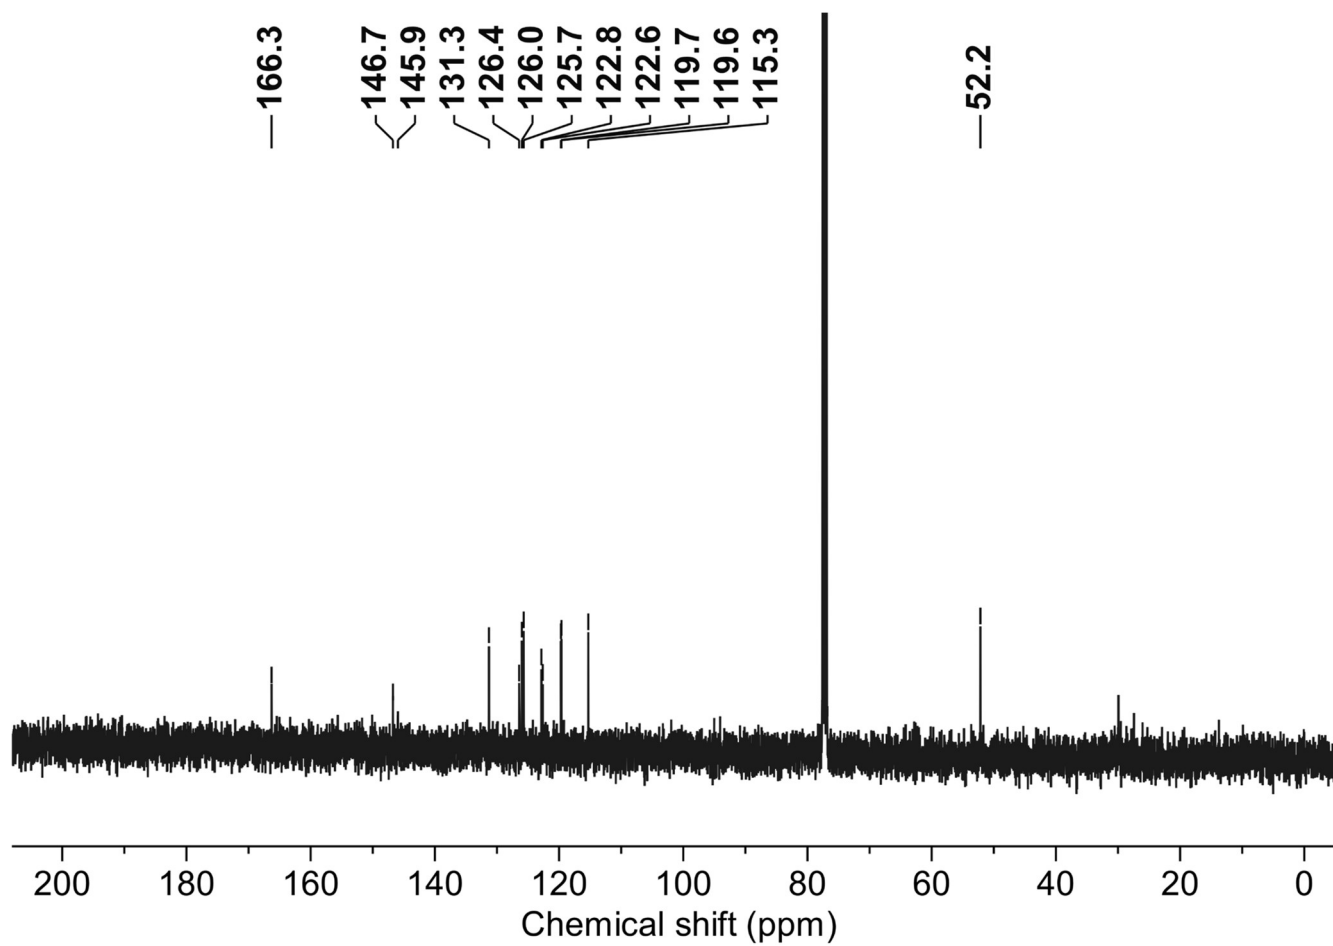

**1,1'-(benzo[4,5]imidazo[1,2-a]benzo[4,5]imidazo[2,1-k][1,10]phenanthroline-10,15-diyl)bis(ethan-1-one) (10):**  $^1\text{H}$  NMR (400 MHz,  $\text{CDCl}_3$ )

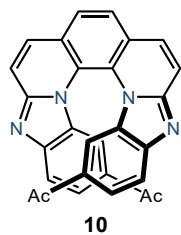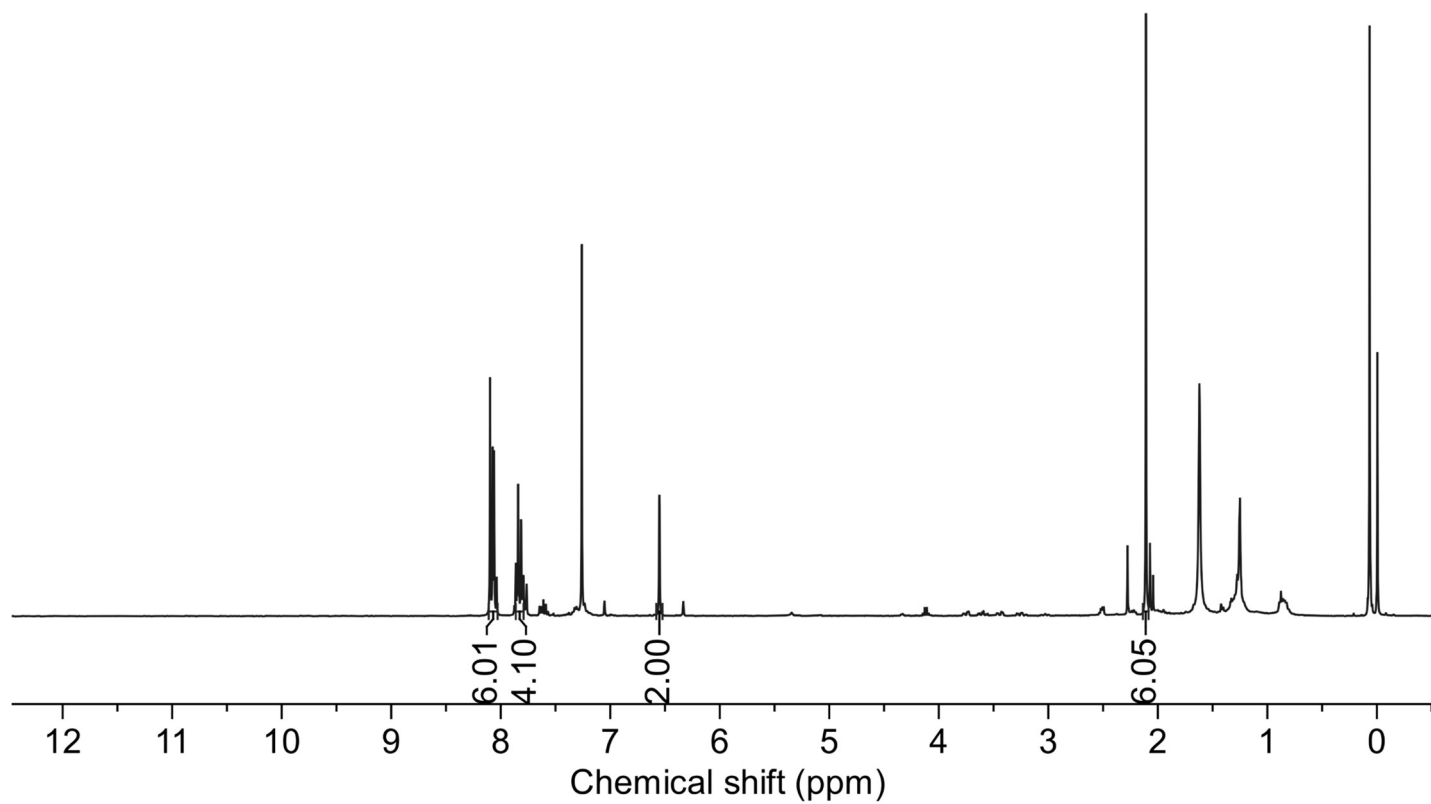

$^{13}\text{C}$  NMR (100 MHz,  $\text{CDCl}_3$ )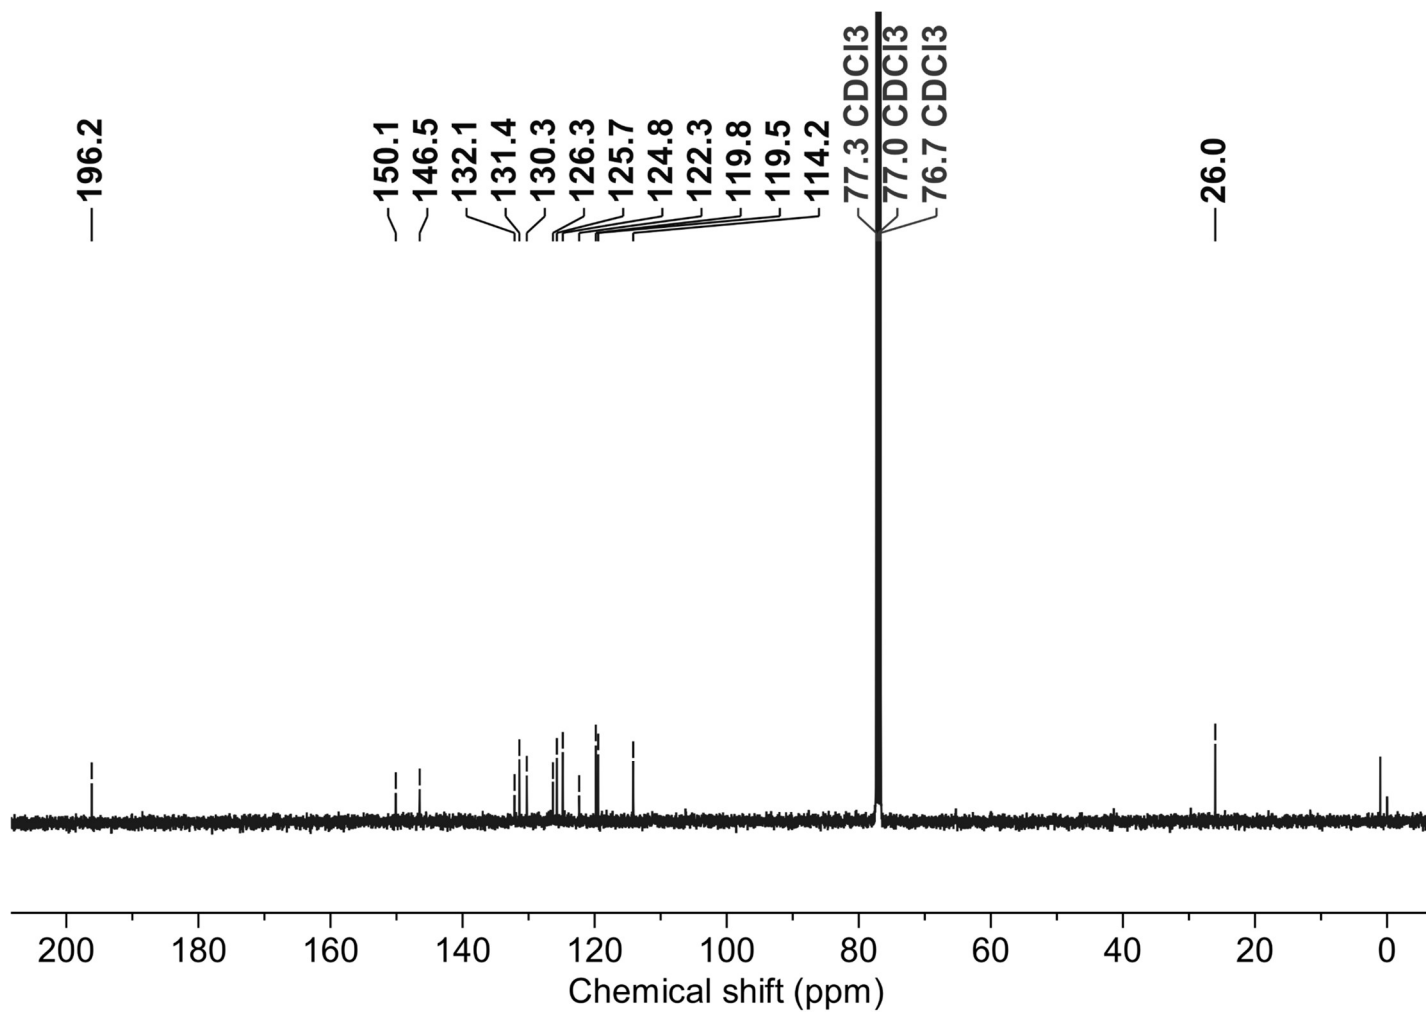

**10,15-bis(trifluoromethyl)benzo[4,5]imidazo[1,2-*a*]benzo[4,5]imidazo[2,1-*k*][1,10]phenanthroline (11):**  $^1\text{H}$  NMR (400 MHz,  $\text{DMSO-}d_6$ )

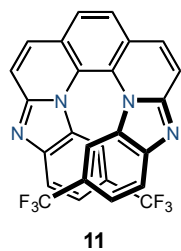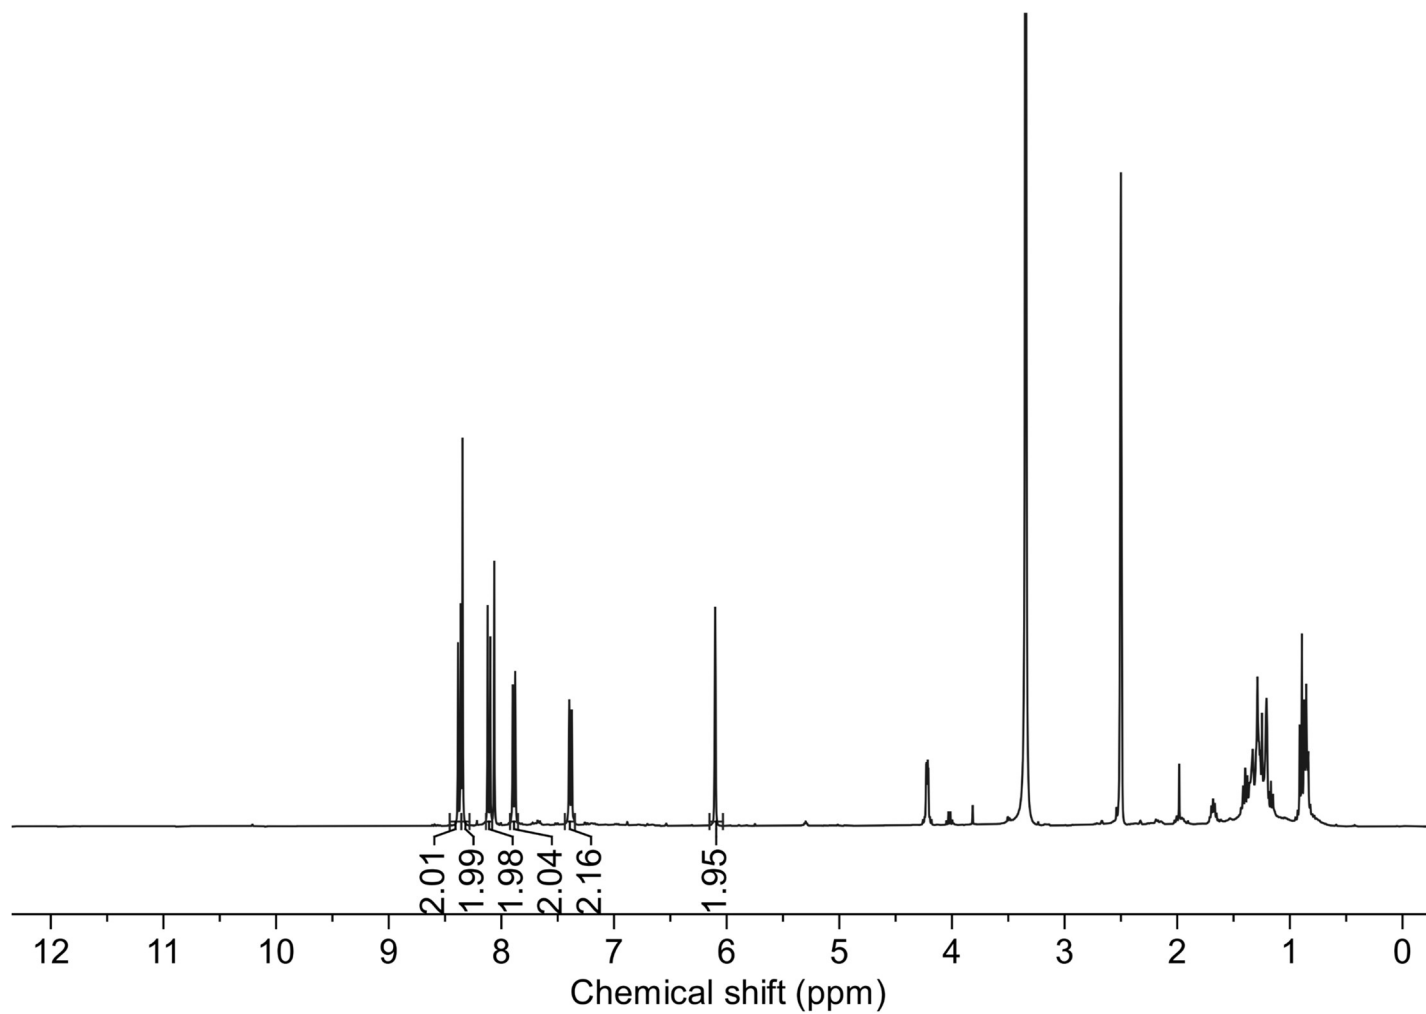

$^{13}\text{C}$  NMR (100 MHz,  $\text{CDCl}_3$ )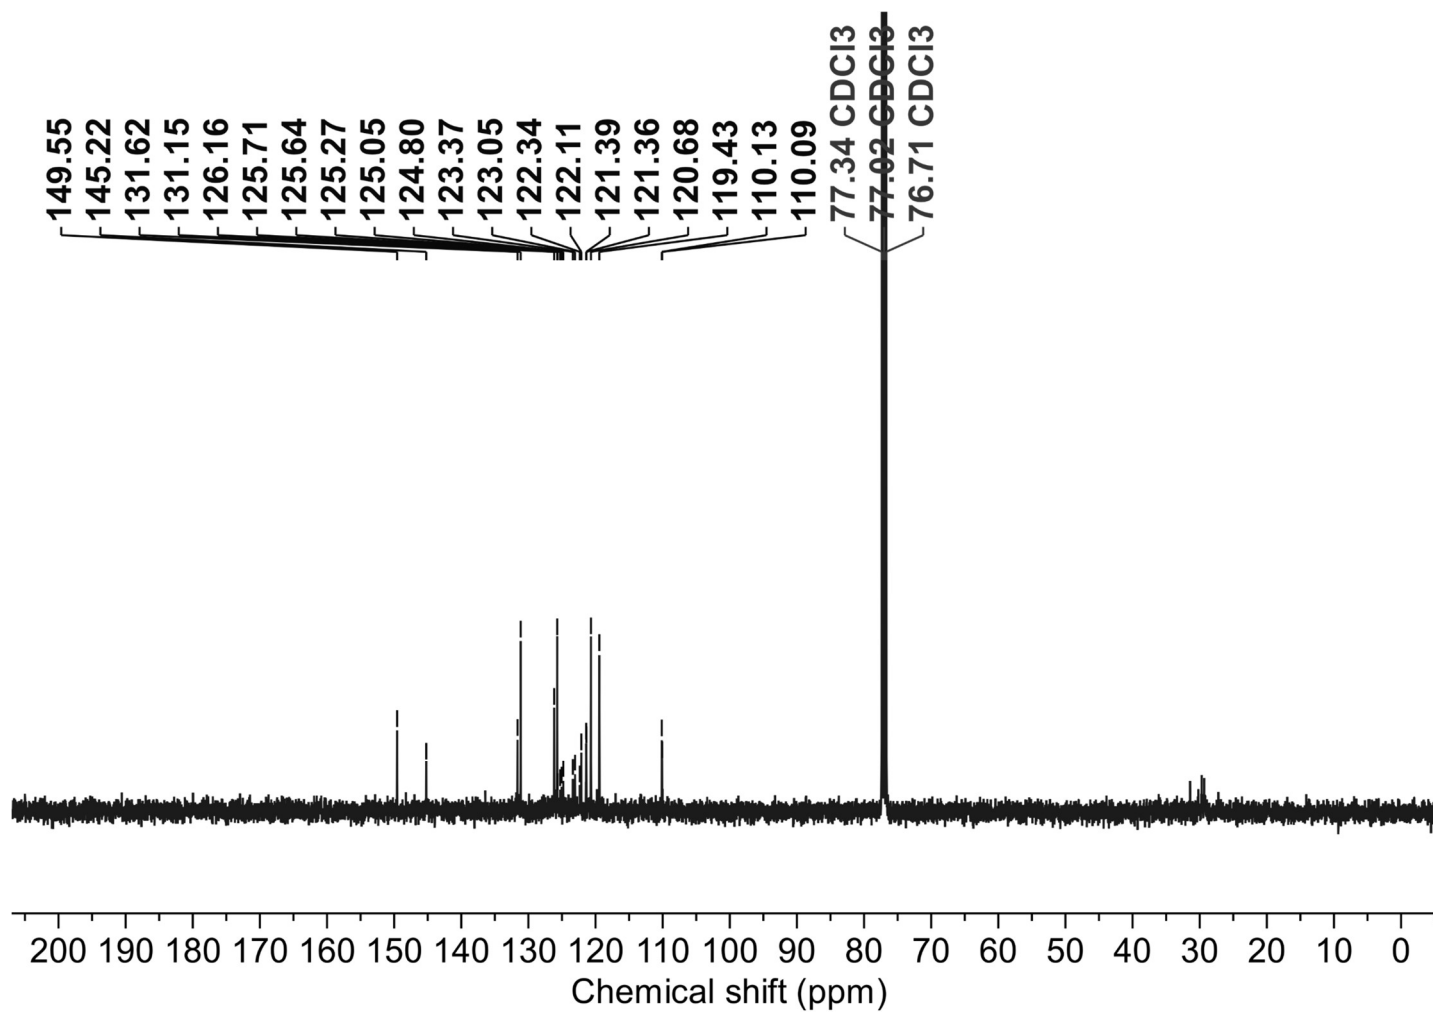

Pyrido[2',3':4,5]imidazo[1,2-a]pyrido[2',3':4,5]imidazo[2,1-k][1,10]phenanthroline (**12**):  $^1\text{H}$  NMR (400 MHz,  $\text{DMSO-}d_6$ )

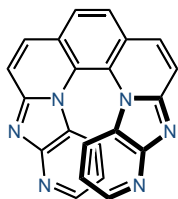

**12**

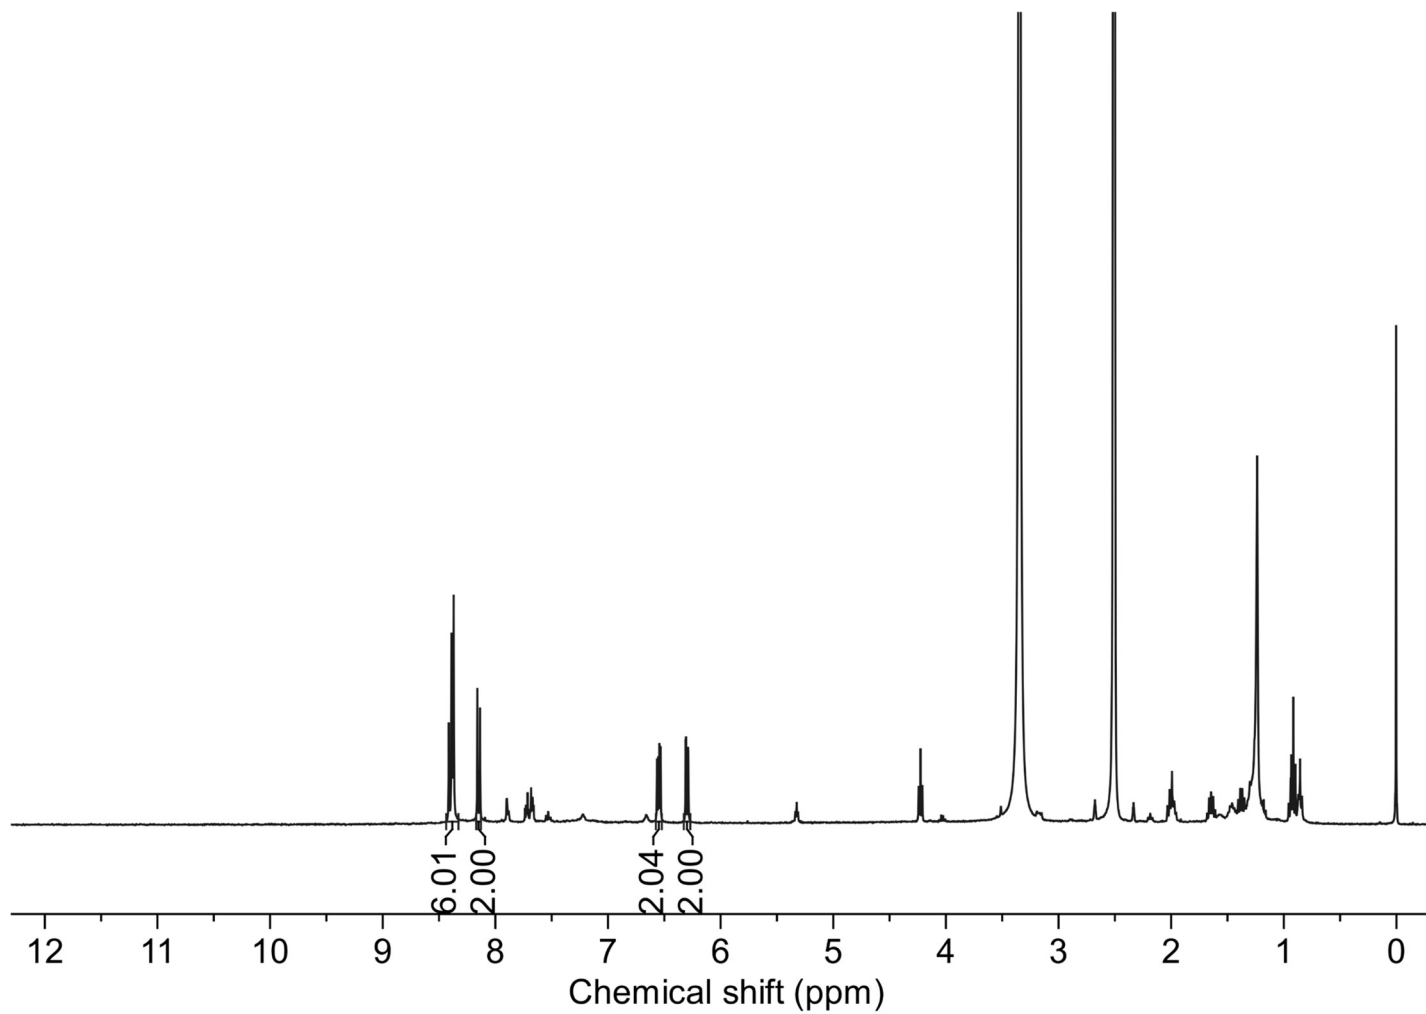

Quinolino[8',7':4,5]imidazo[1,2-*a*]quinolino[8',7':4,5]imidazo[2,1-*k*][1,10]phenanthroline (13):  $^1\text{H}$  NMR (400 MHz,  $\text{CDCl}_3$ )

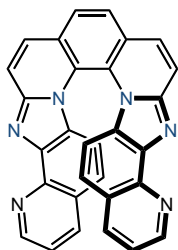

13

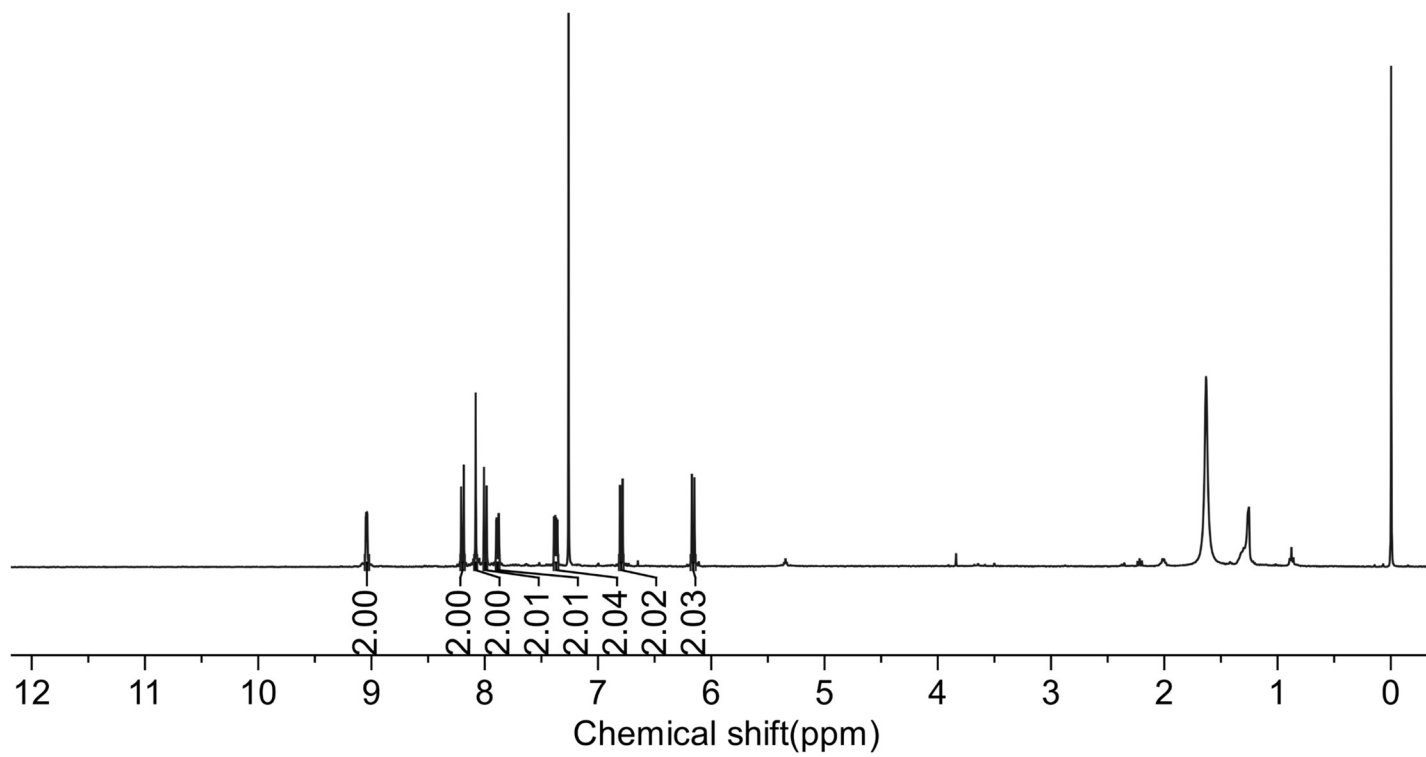

$^{13}\text{C}$  NMR (100 MHz,  $\text{CDCl}_3$ )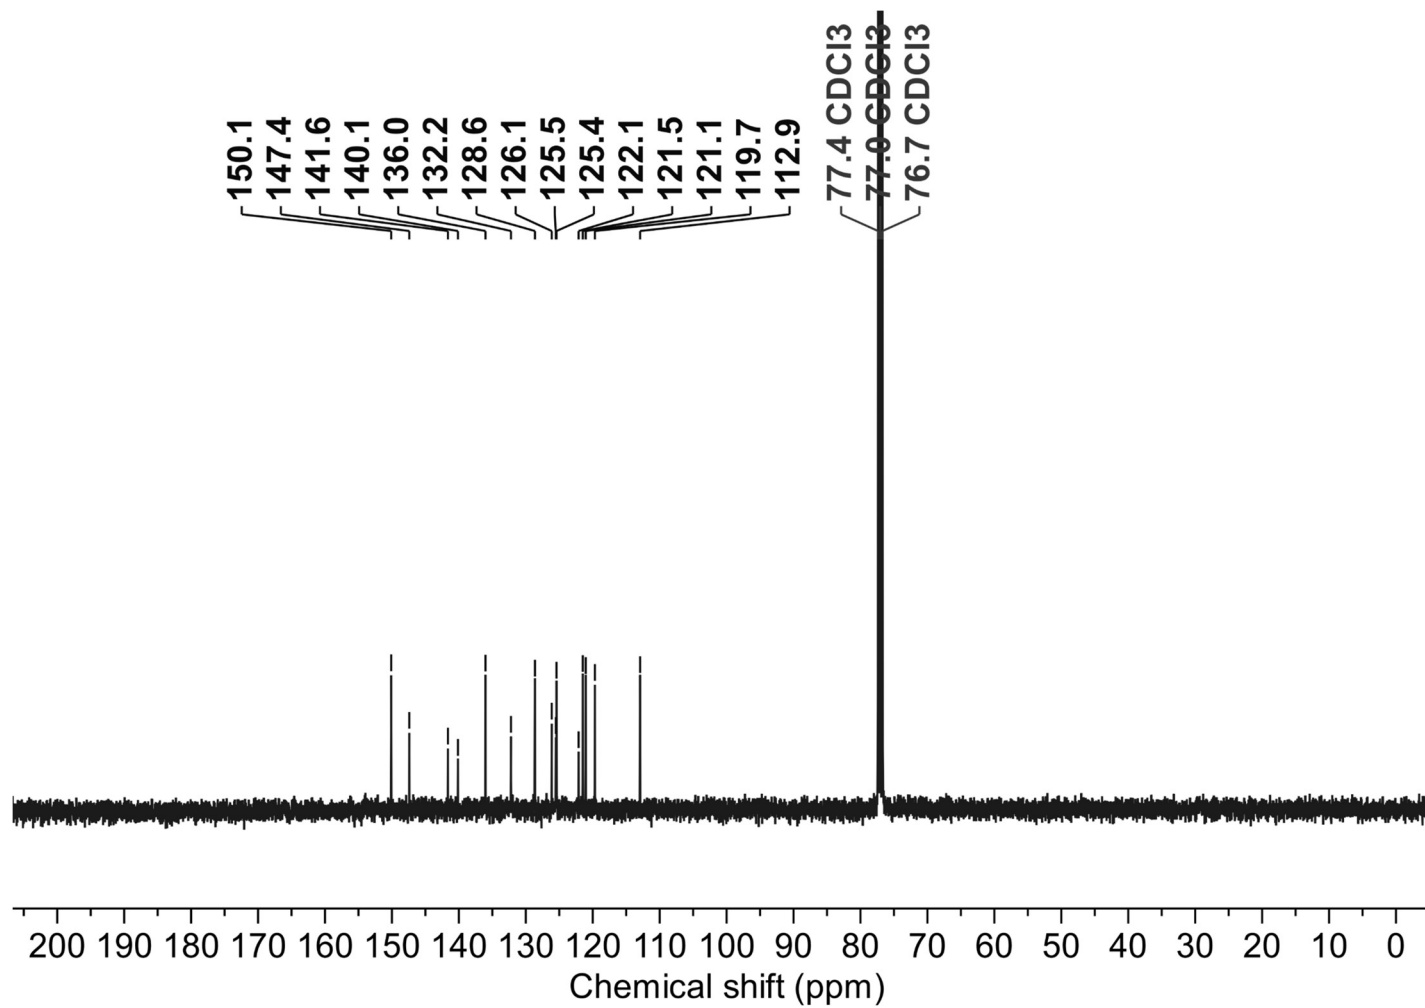

Naphtho[1',2':4,5]imidazo[1,2-*a*]naphtho[1,2':4,5]imidazo[2,1-*k*][1,10]phenanthroline (**14**):  $^1\text{H}$  NMR (400 MHz,  $\text{DMSO-}d_6$ )

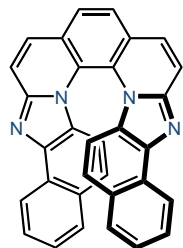

**14**

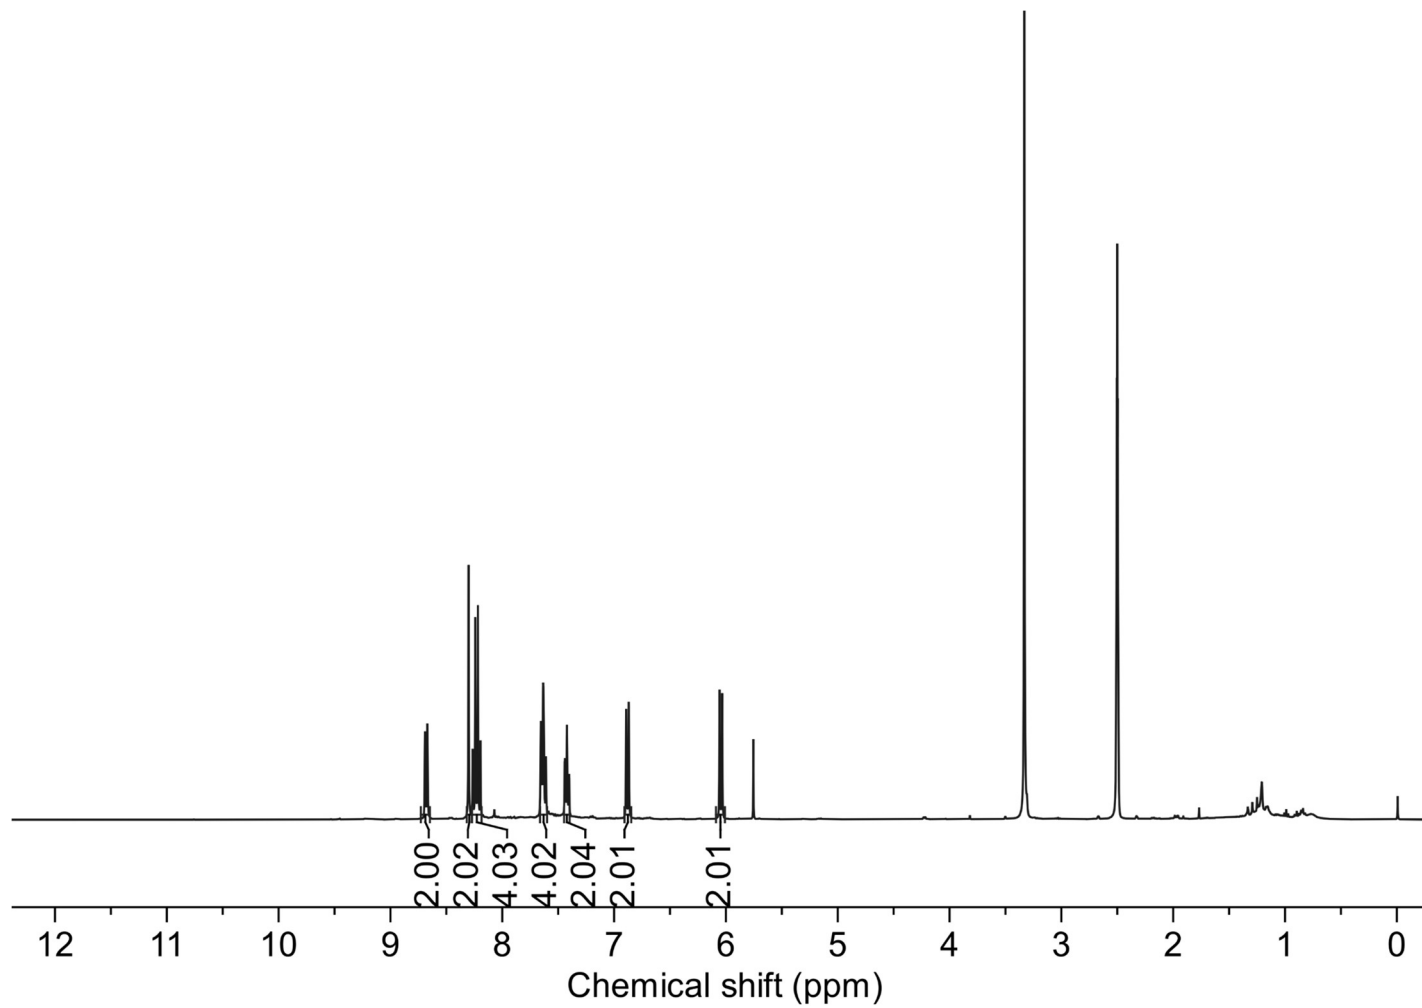

$^{13}\text{C}$  NMR (100 MHz, DMSO- $d_6$ )

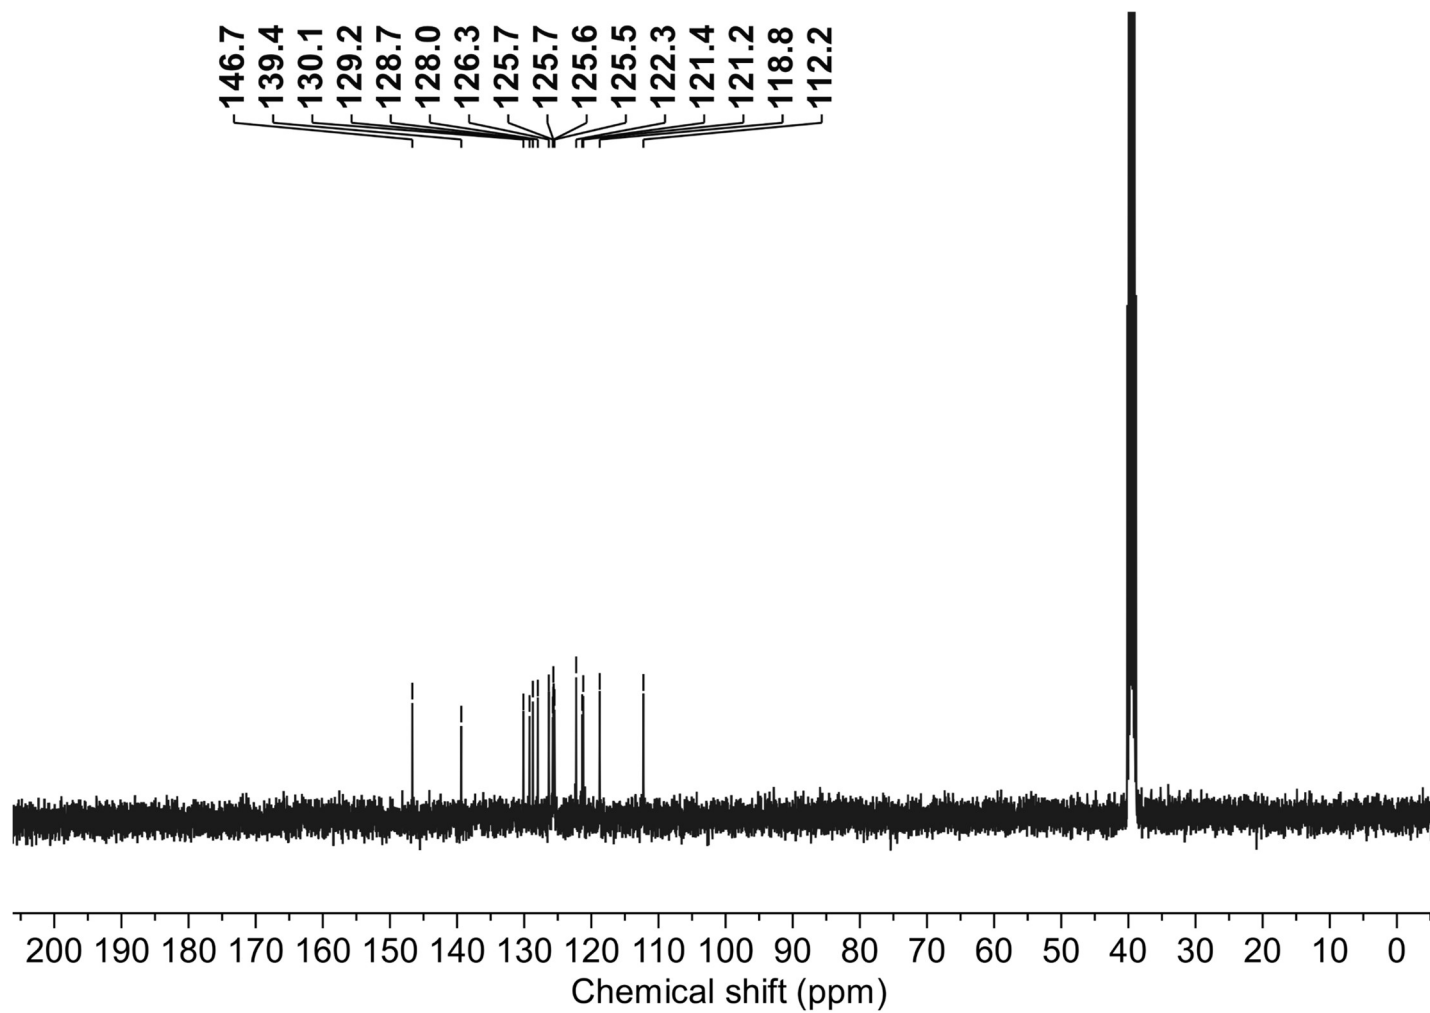

Naphtho[2',3':4,5]imidazo[1,2-*a*]naphtho[2',3':4,5]imidazo[2,1-*k*][1,10]phenanthroline (15):  $^1\text{H}$  NMR (400 MHz,  $\text{CDCl}_3$ )

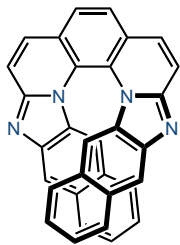

15

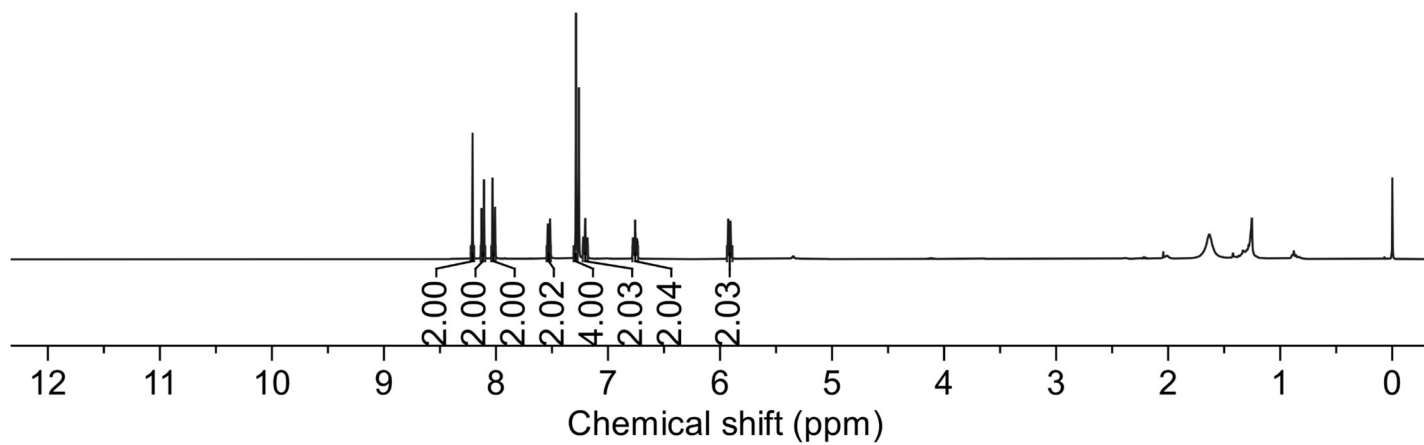

$^{13}\text{C}$  NMR (100 MHz,  $\text{CDCl}_3$ )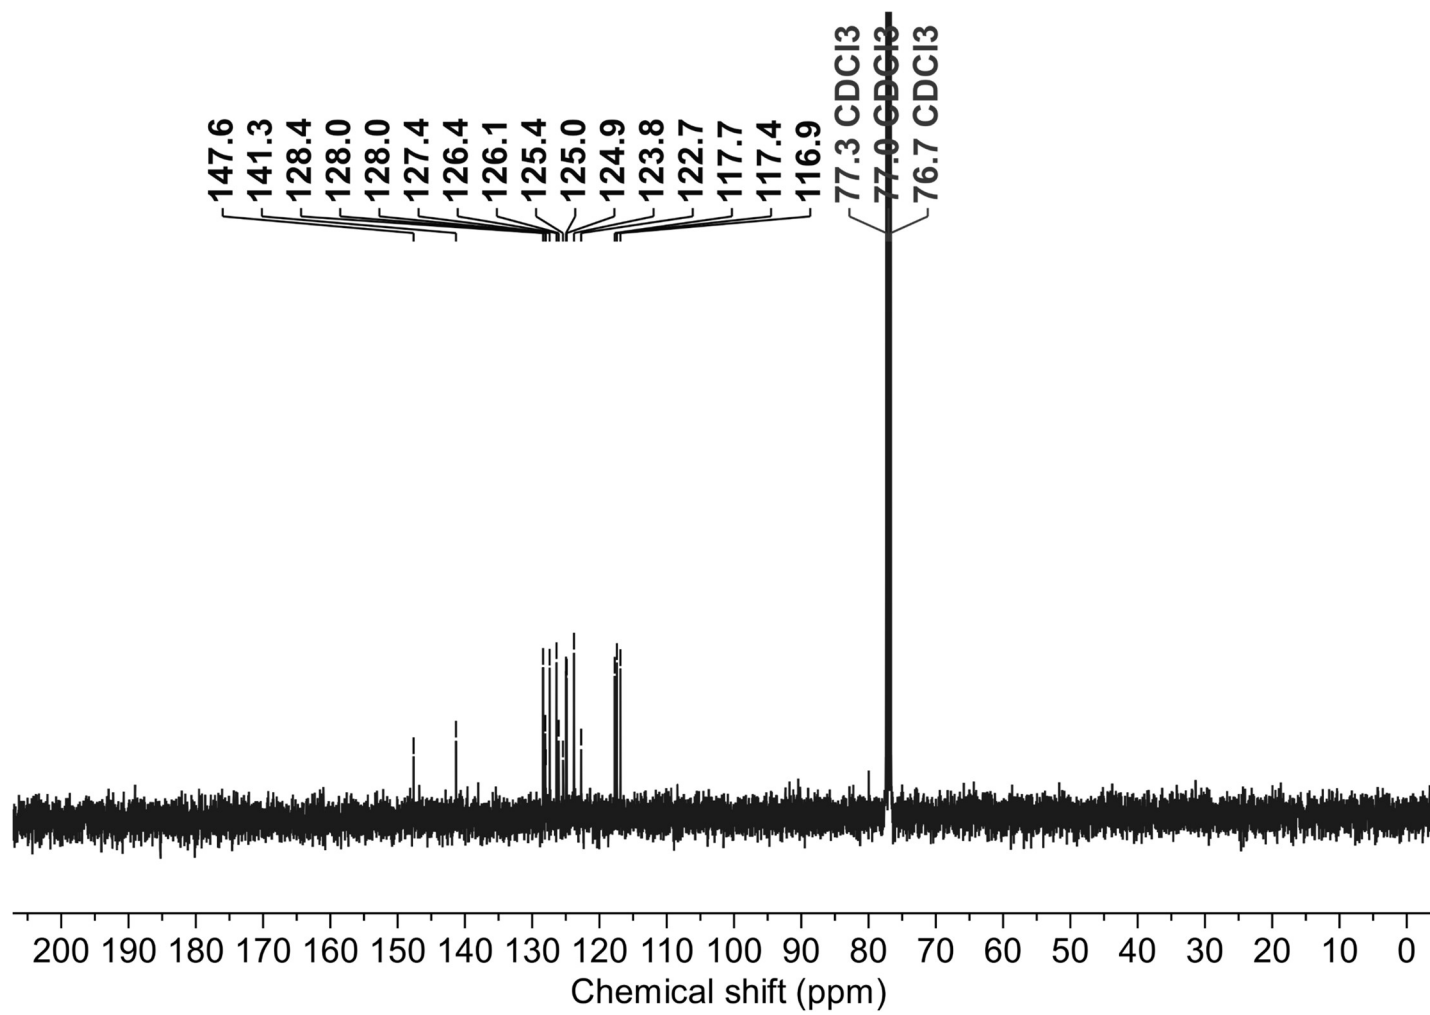

**9,10,15,16-tetramethoxybenzo[4,5]imidazo[1,2-a]benzo[4,5]imidazo[2,1-k][1,10]phenanthroline (16):**  $^1\text{H}$  NMR (400 MHz,  $\text{DMSO-}d_6$ )

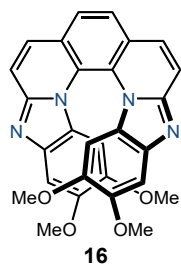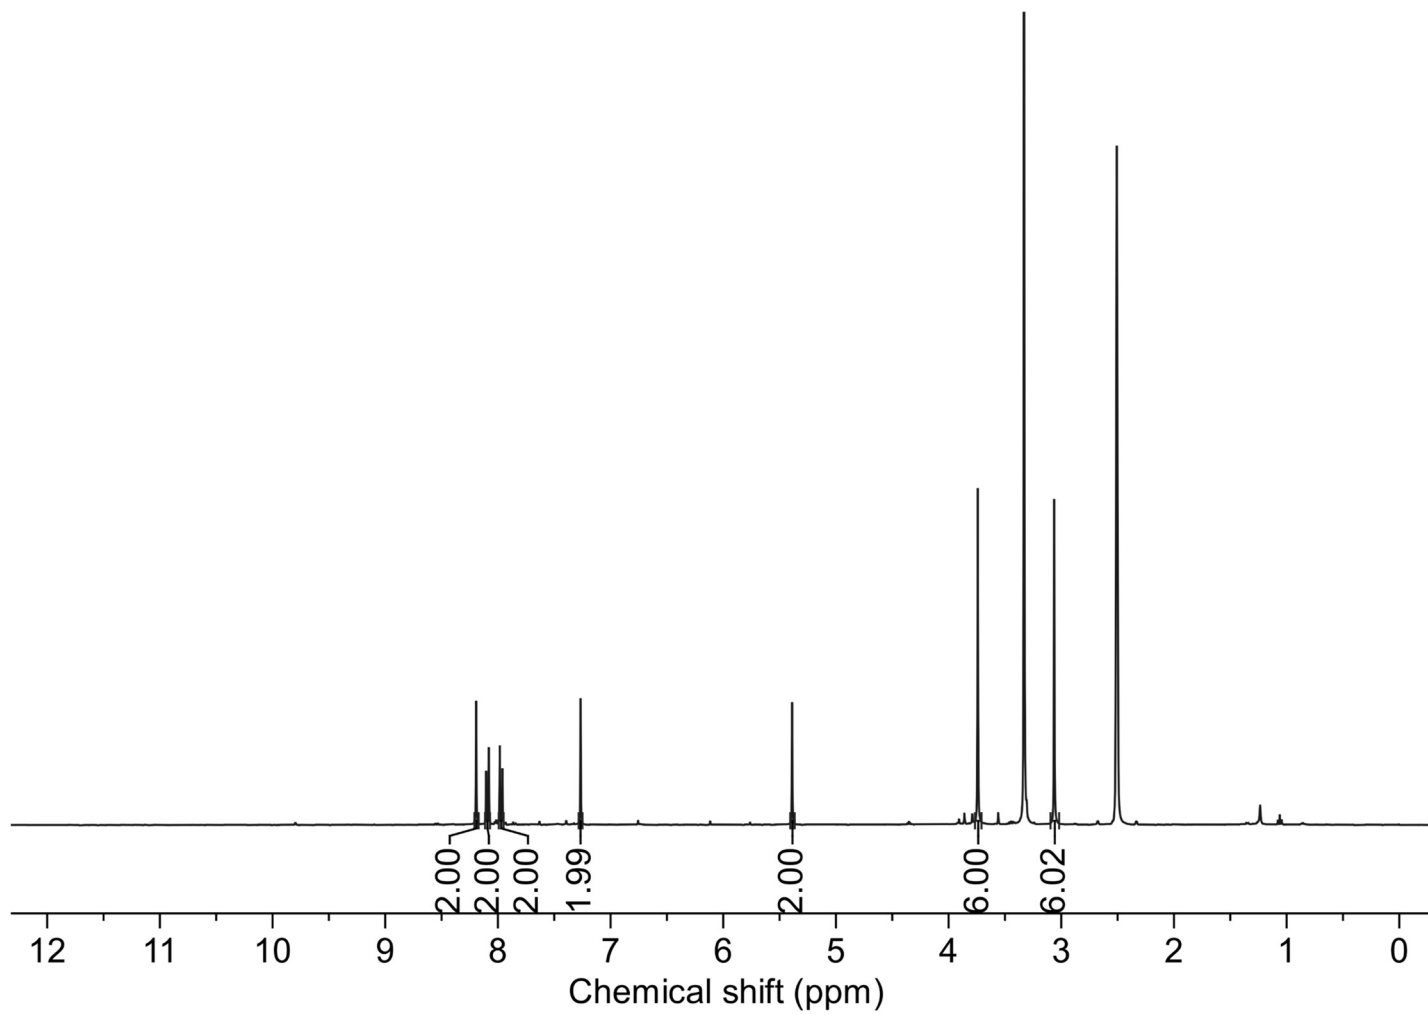

$^{13}\text{C}$  NMR (100 MHz,  $\text{CDCl}_3$ )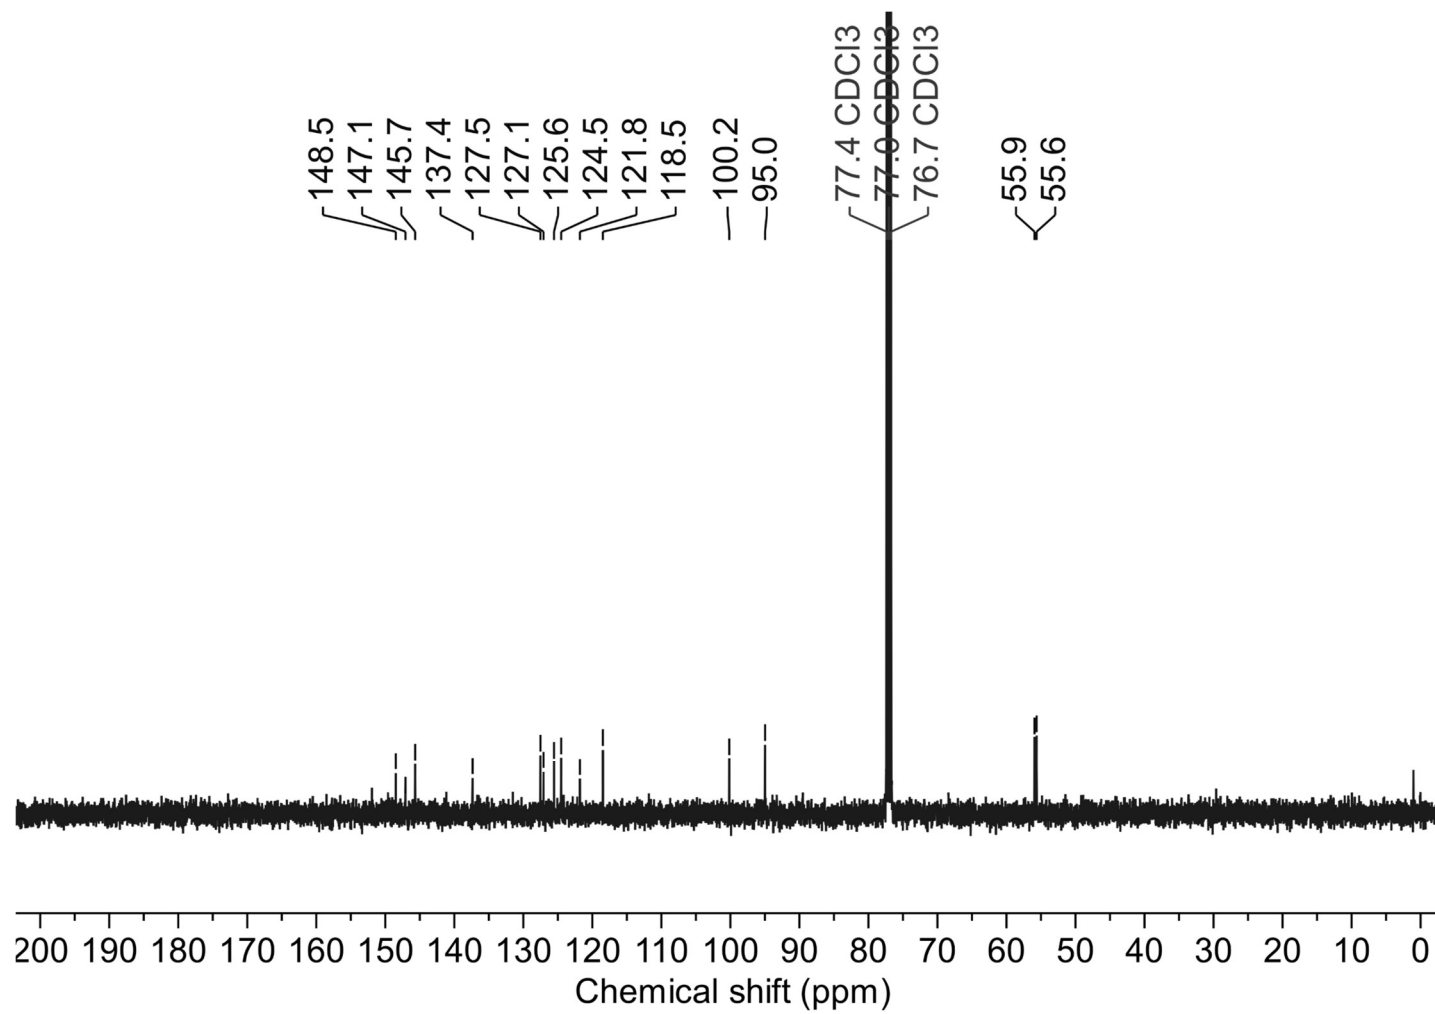

Pyrido[2''',1'''':2'',3'']imidazo[4'',5''':3',4']benzo[1',2':4,5]imidazo[1,2-*a*]pyridine (17):  $^1\text{H}$  NMR (400 MHz,  $\text{CDCl}_3$ )

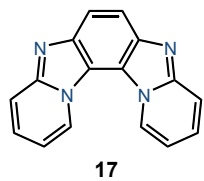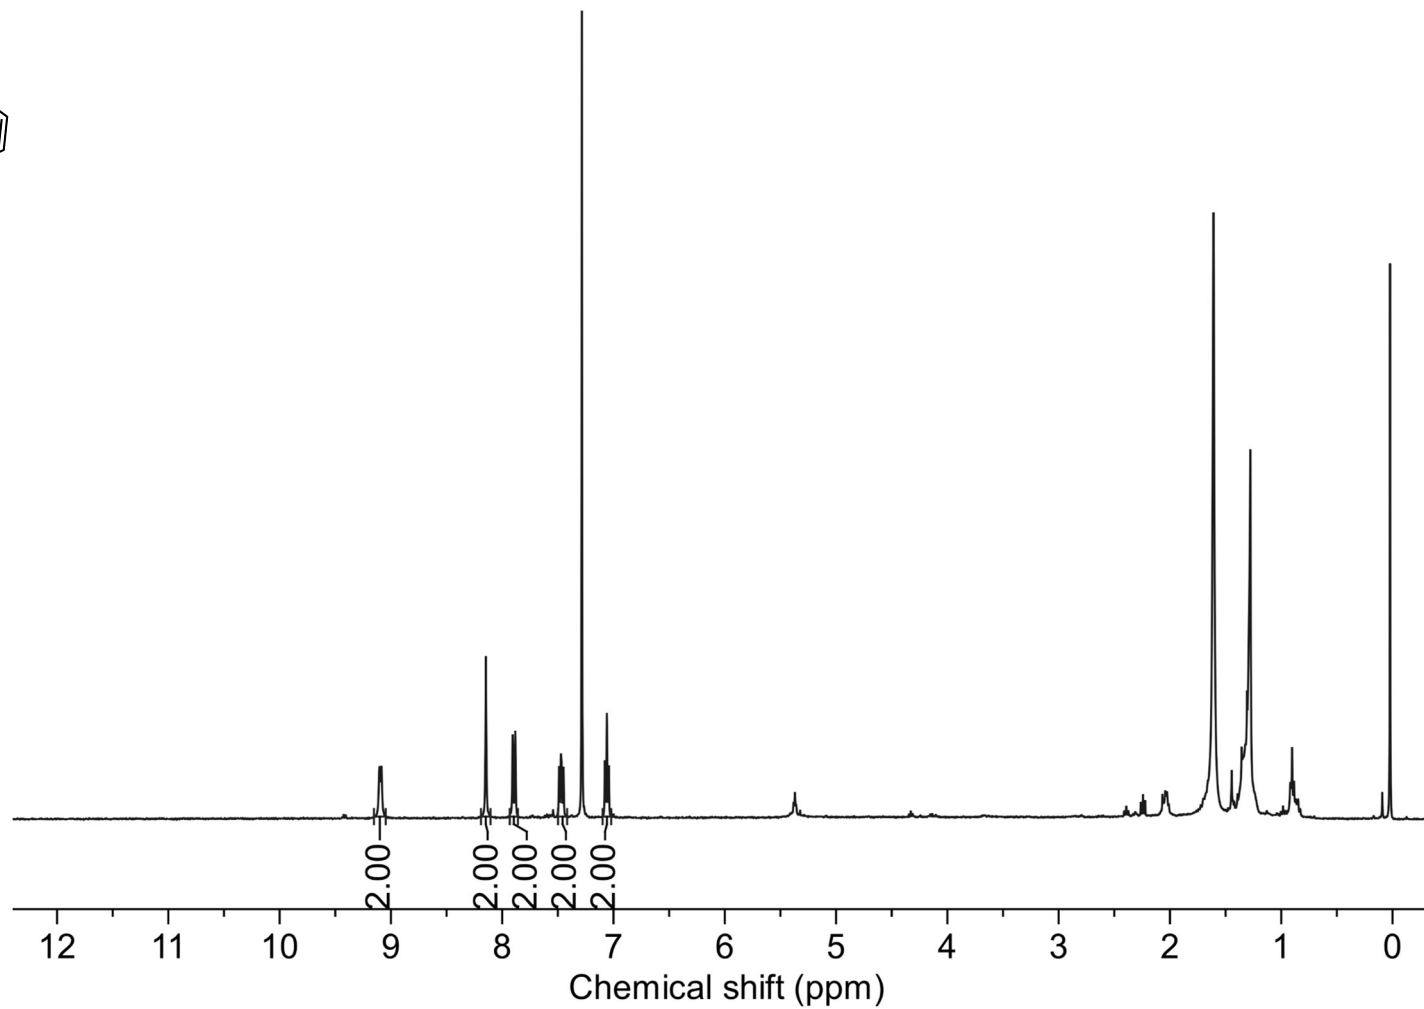

$^{13}\text{C}$  NMR (100 MHz,  $\text{CDCl}_3$ )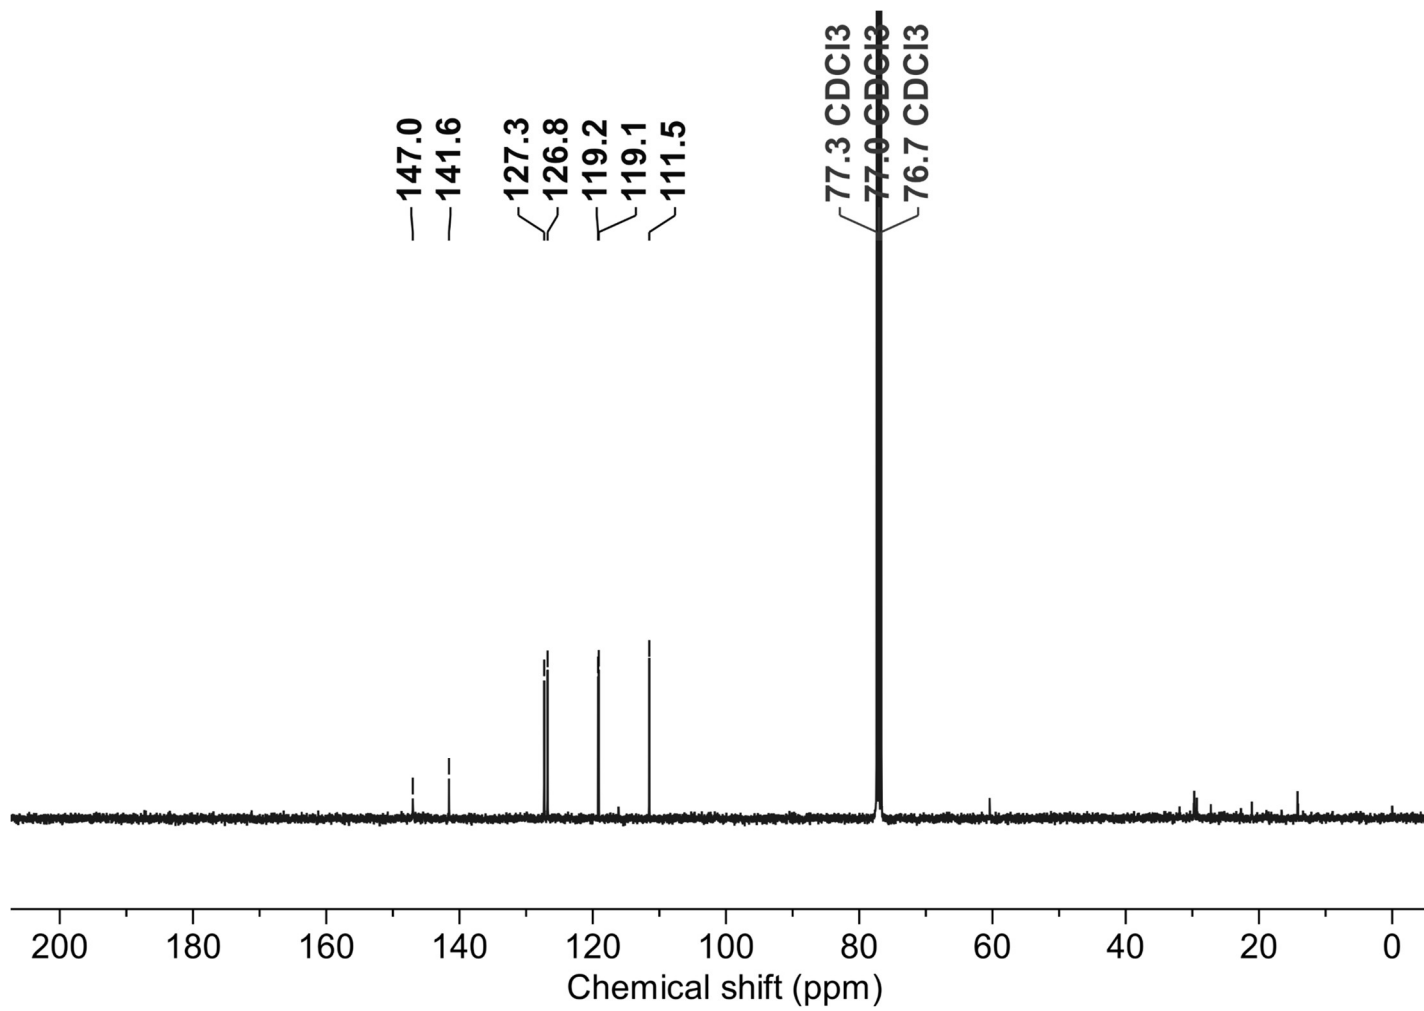

Pyrido[2''',1''':2'',3'']imidazo[4'',5'':3',4']benzo[1',2':4,5]imidazo[1,2-*a*]quinoline (18):  $^1\text{H}$  NMR (400 MHz,  $\text{CDCl}_3$ )

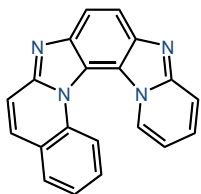

18

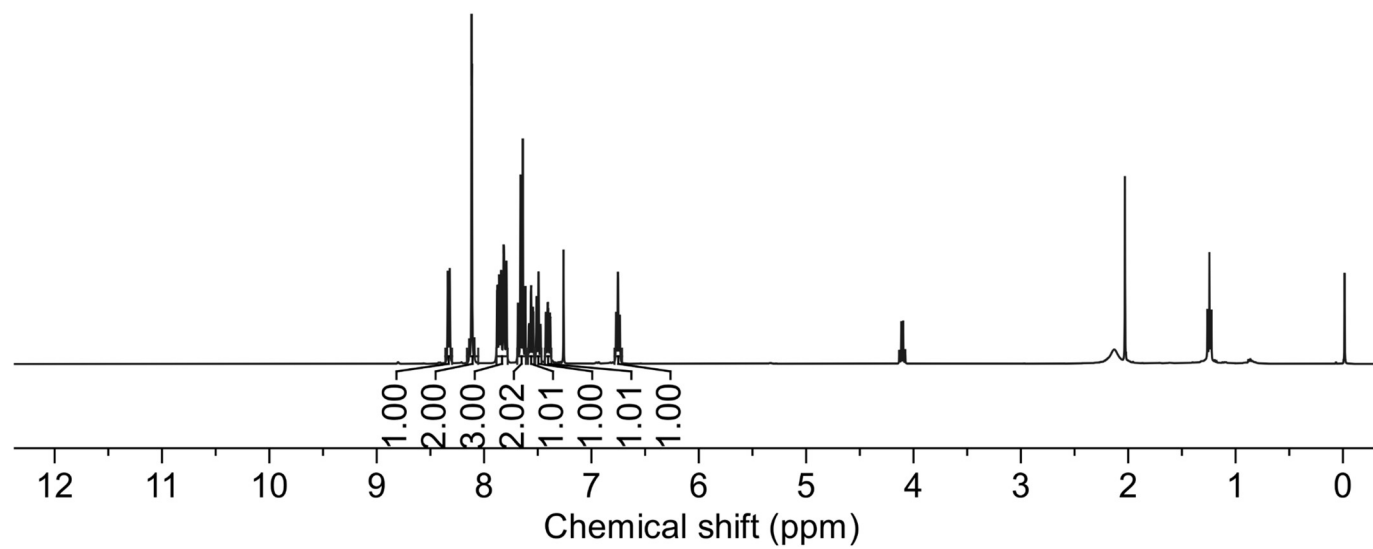

$^{13}\text{C}$  NMR (400 MHz,  $\text{CDCl}_3$ )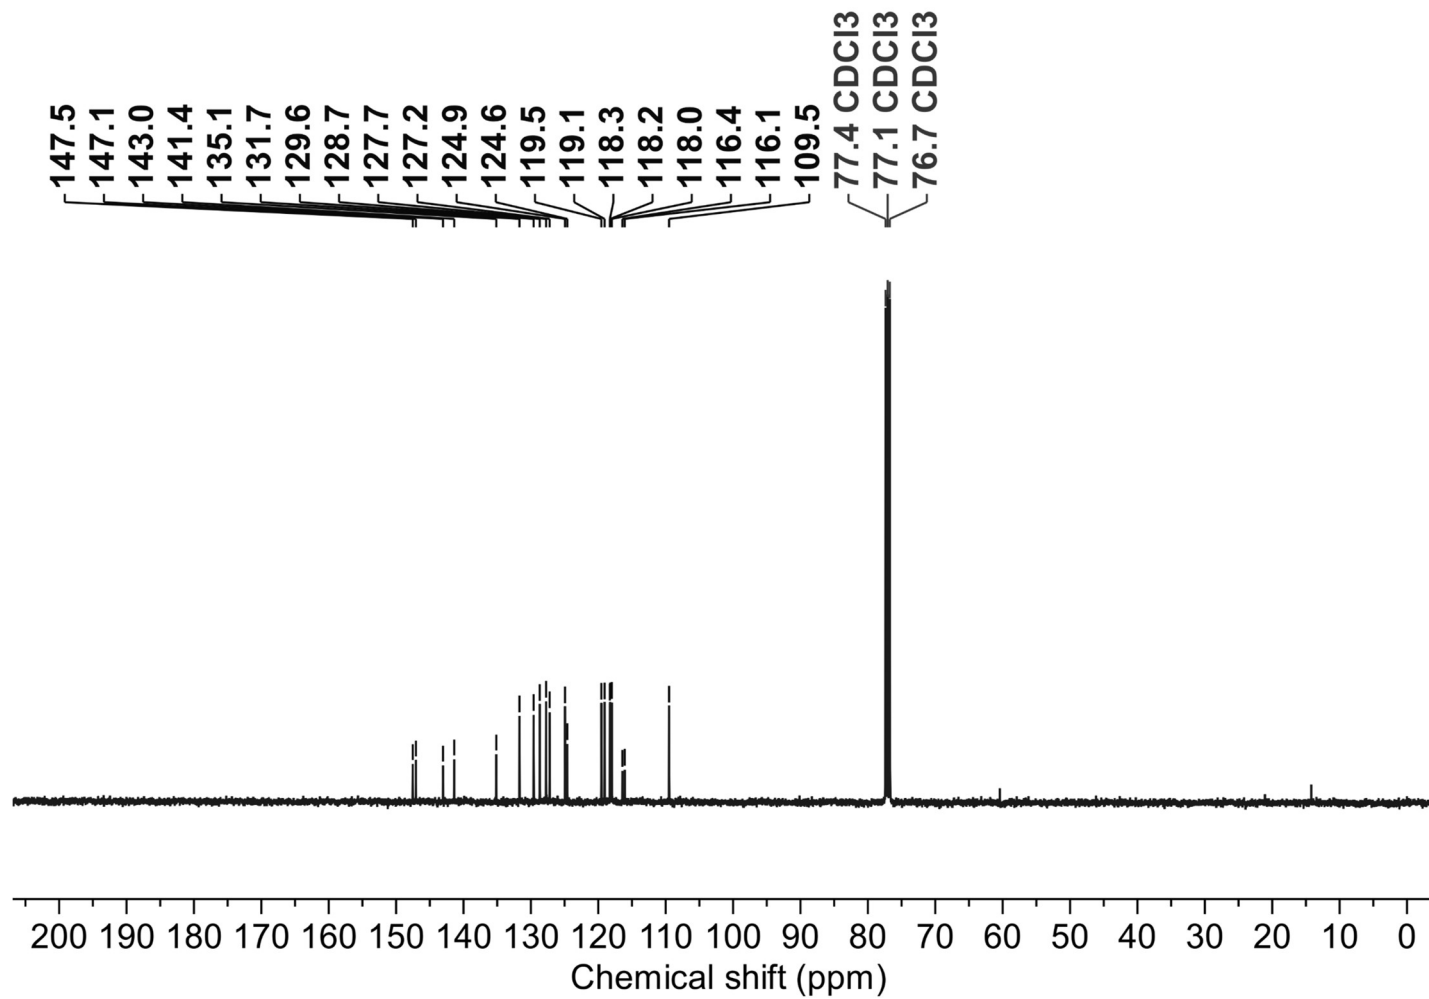

Quinolino[2''',1'''':2'',3''']imidazo[4'',5'':3',4']benzo[1',2':4,5]imidazo[1,2-*a*]quinoline (19):  $^1\text{H}$  NMR (400 MHz,  $\text{CDCl}_3$ )

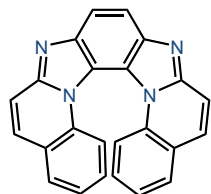

19

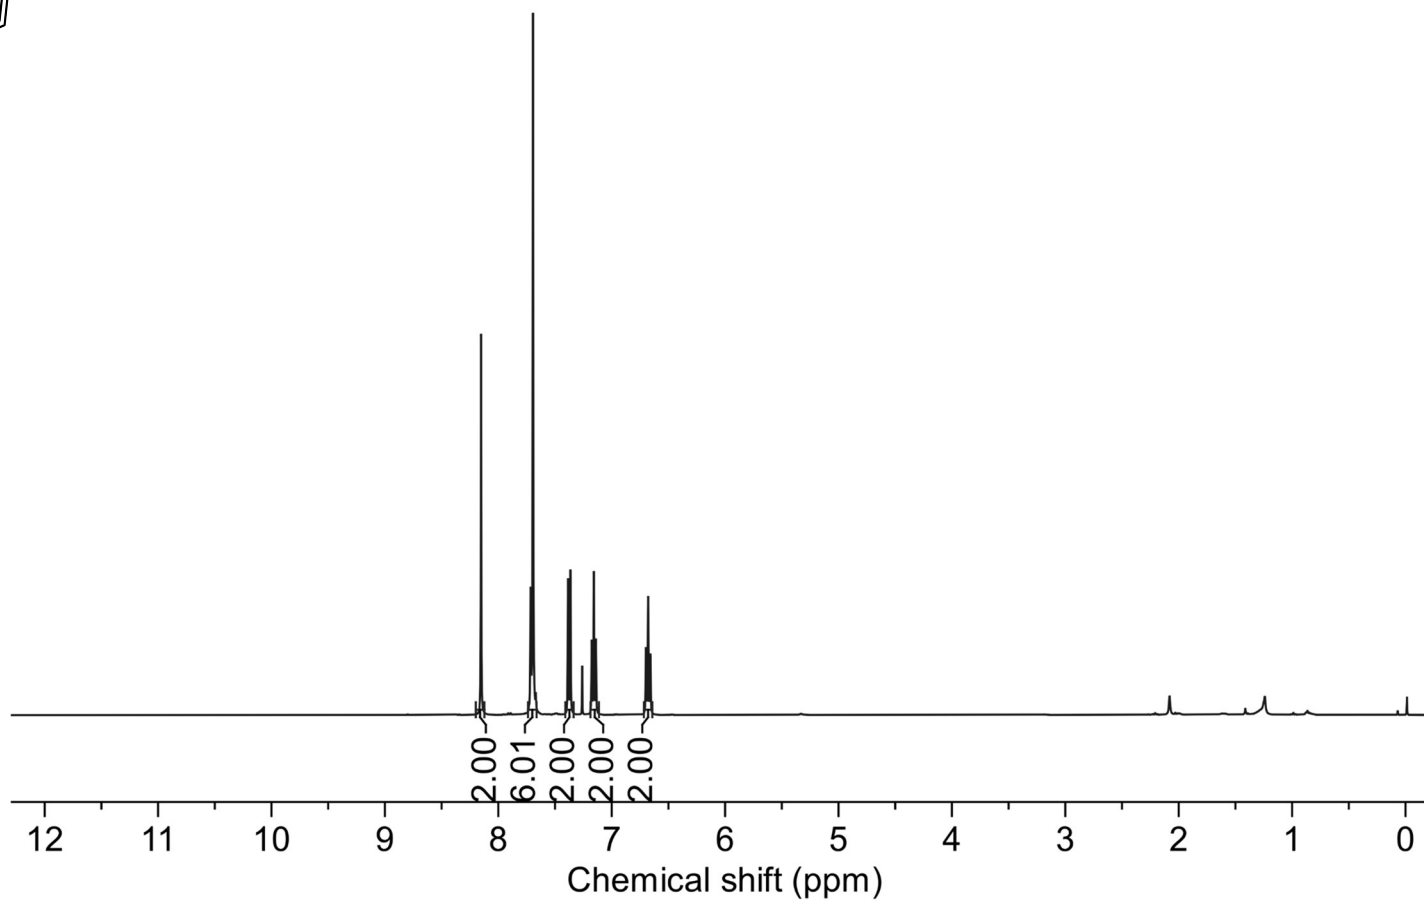

$^{13}\text{C}$  NMR (100 MHz,  $\text{CDCl}_3$ )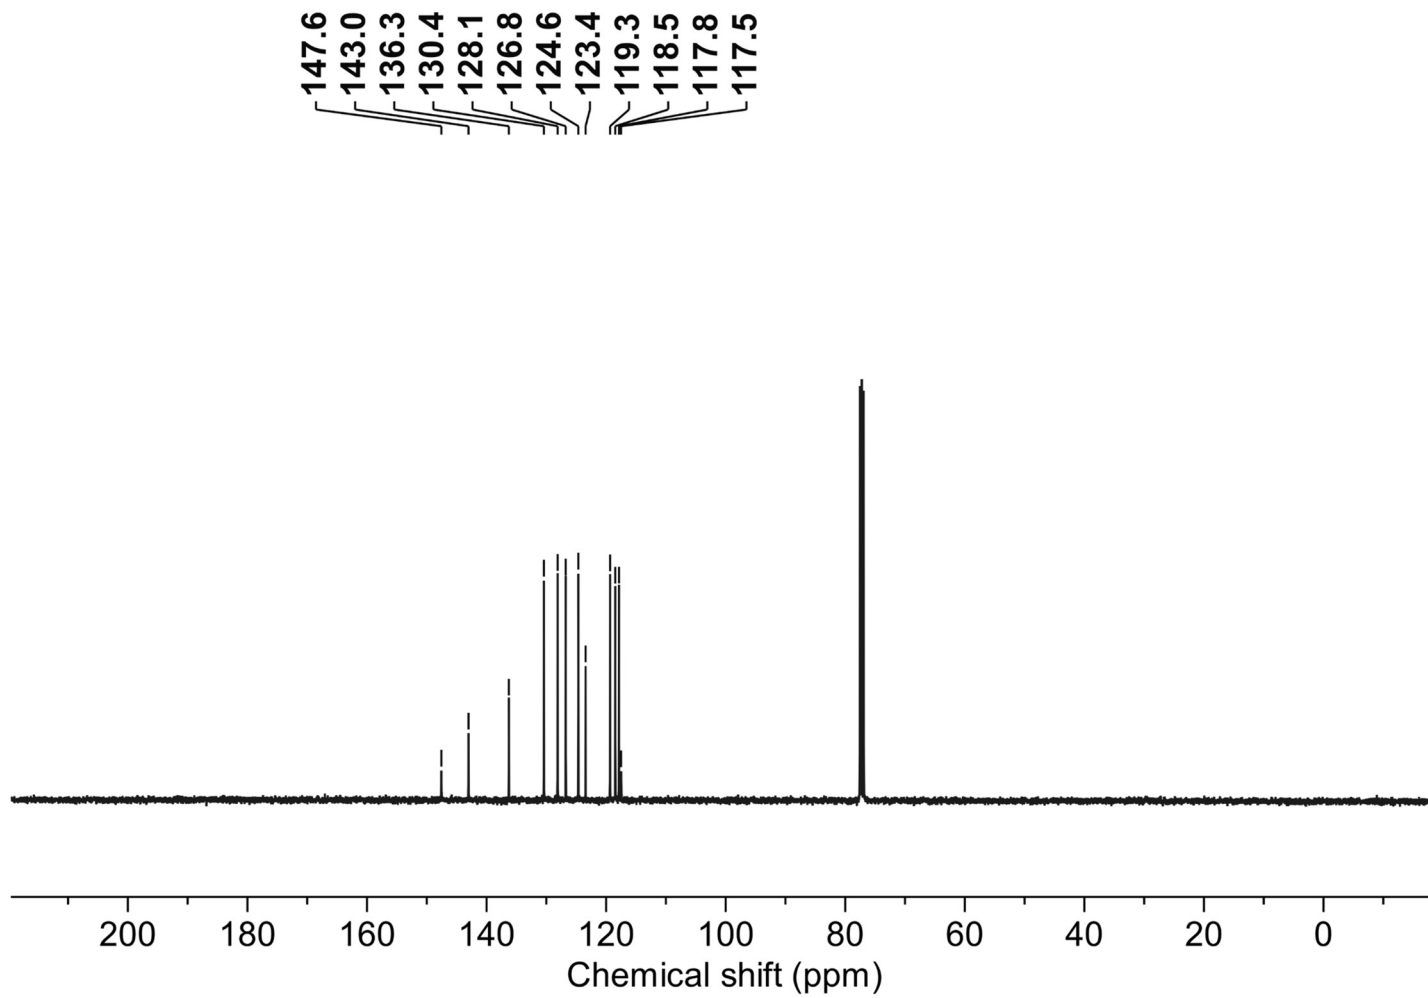

**2,15-Dibromoquinolino[2''',1'''':2'',3'']imidazo[4'',5'':3',4']benzo[1',2':4,5]imidazo[1,2-a]quinoline (20):**  $^1\text{H}$  NMR (400 MHz,  $\text{DMSO-}d_6$ )

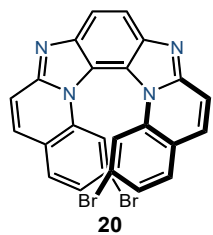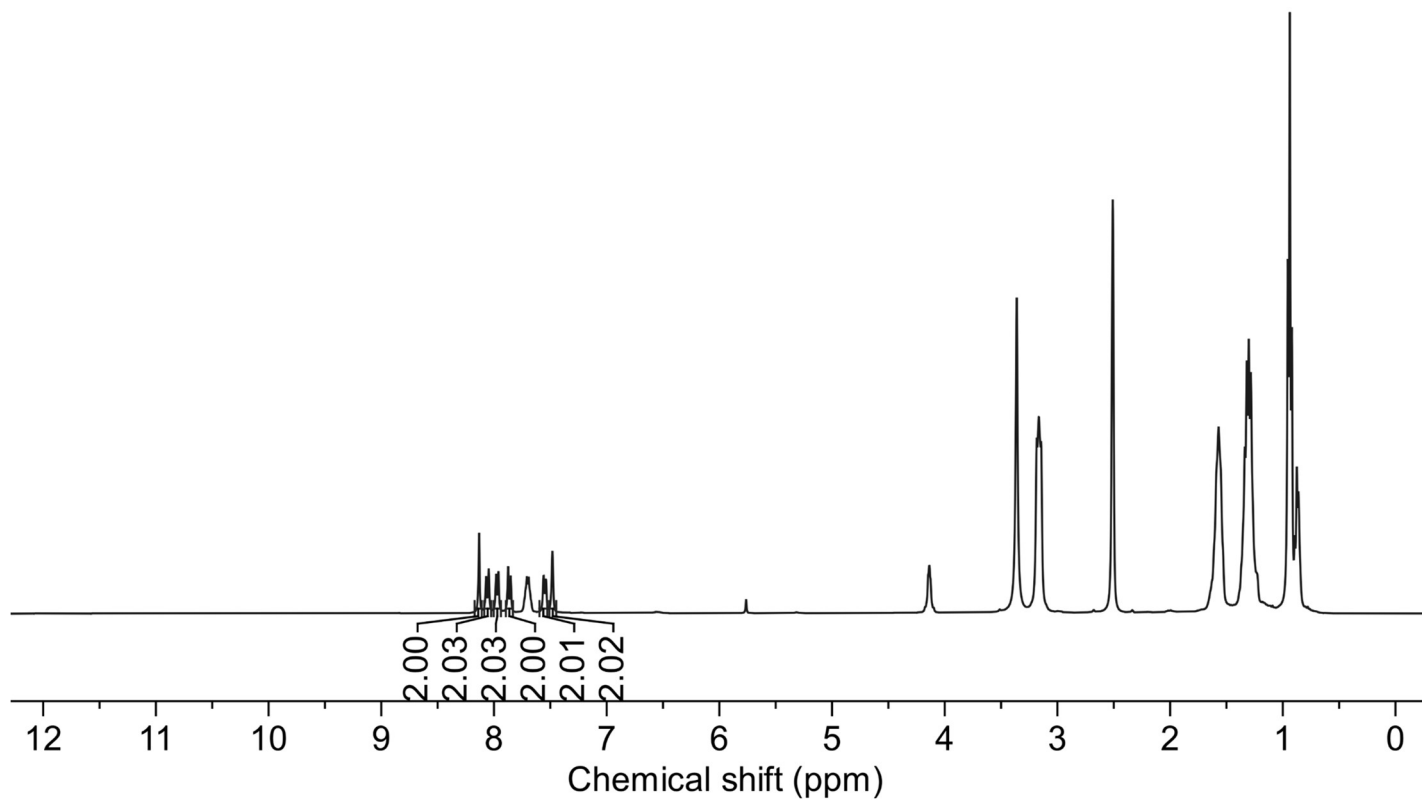

$^{13}\text{C}$  NMR (100 MHz,  $\text{CDCl}_3$ )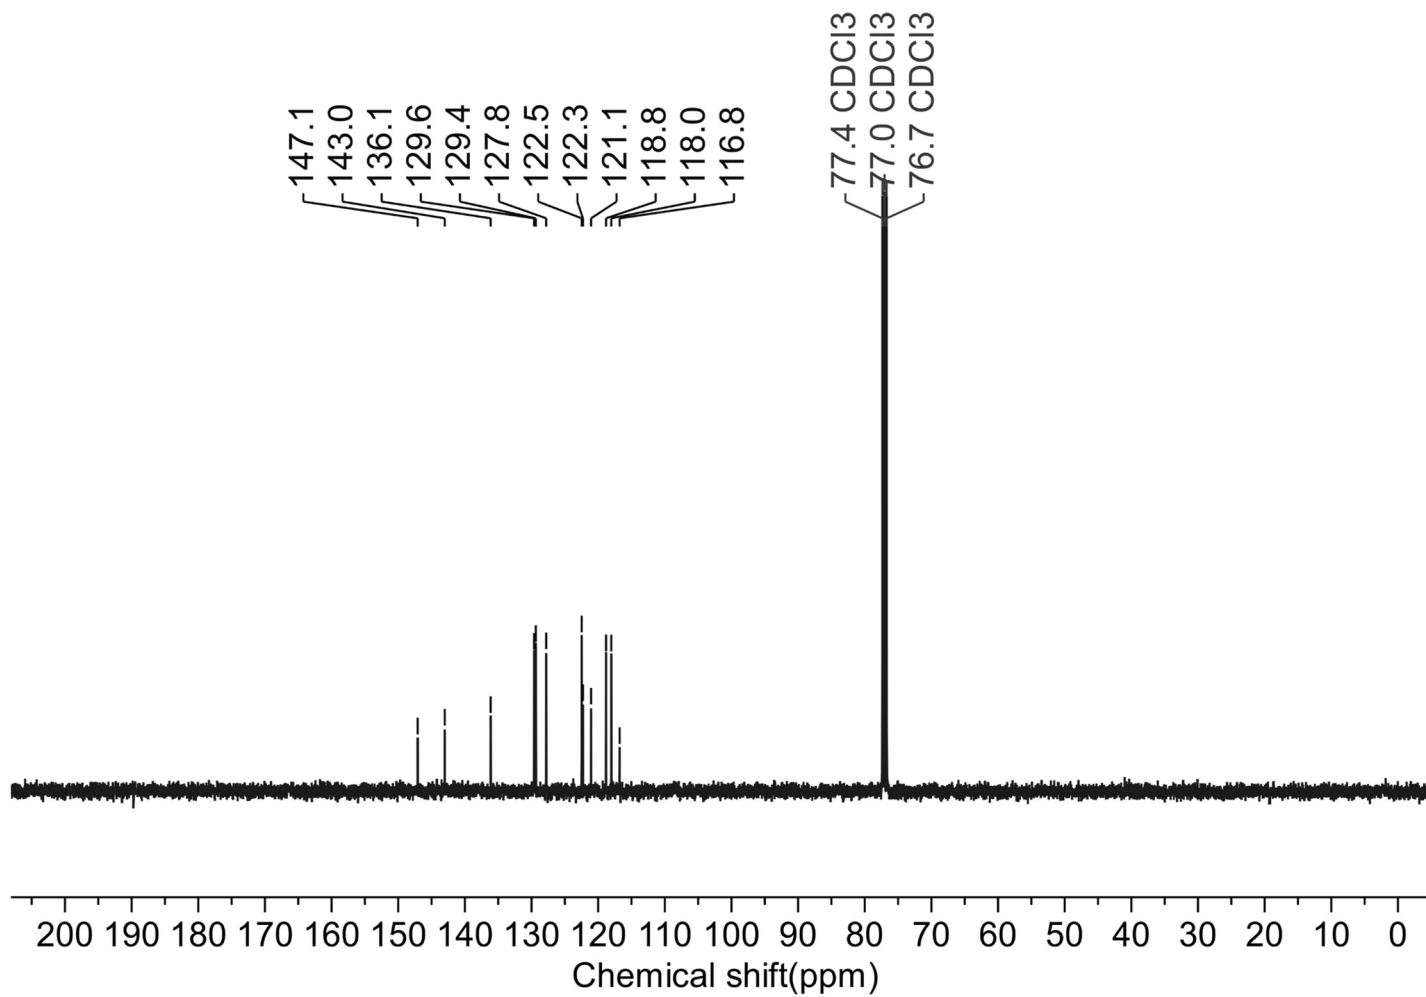

Quinolino[2''',1'''':2'',3''']imidazo[4'',5'':3',4']benzo[1',2':4,5]imidazo[1,2-a][1,10]phenanthroline (21):  $^1\text{H}$  NMR (400 MHz,  $\text{CDCl}_3$ )

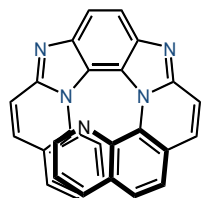

21

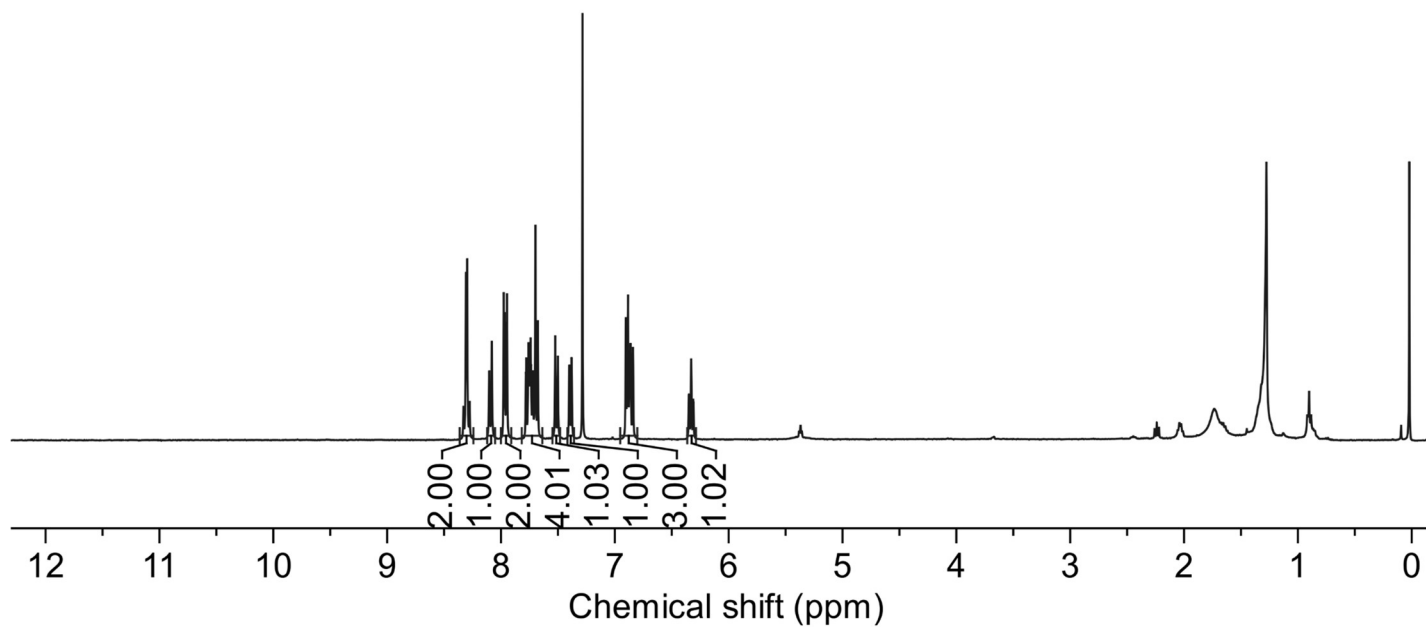

$^{13}\text{C}$  NMR (100 MHz,  $\text{CDCl}_3$ )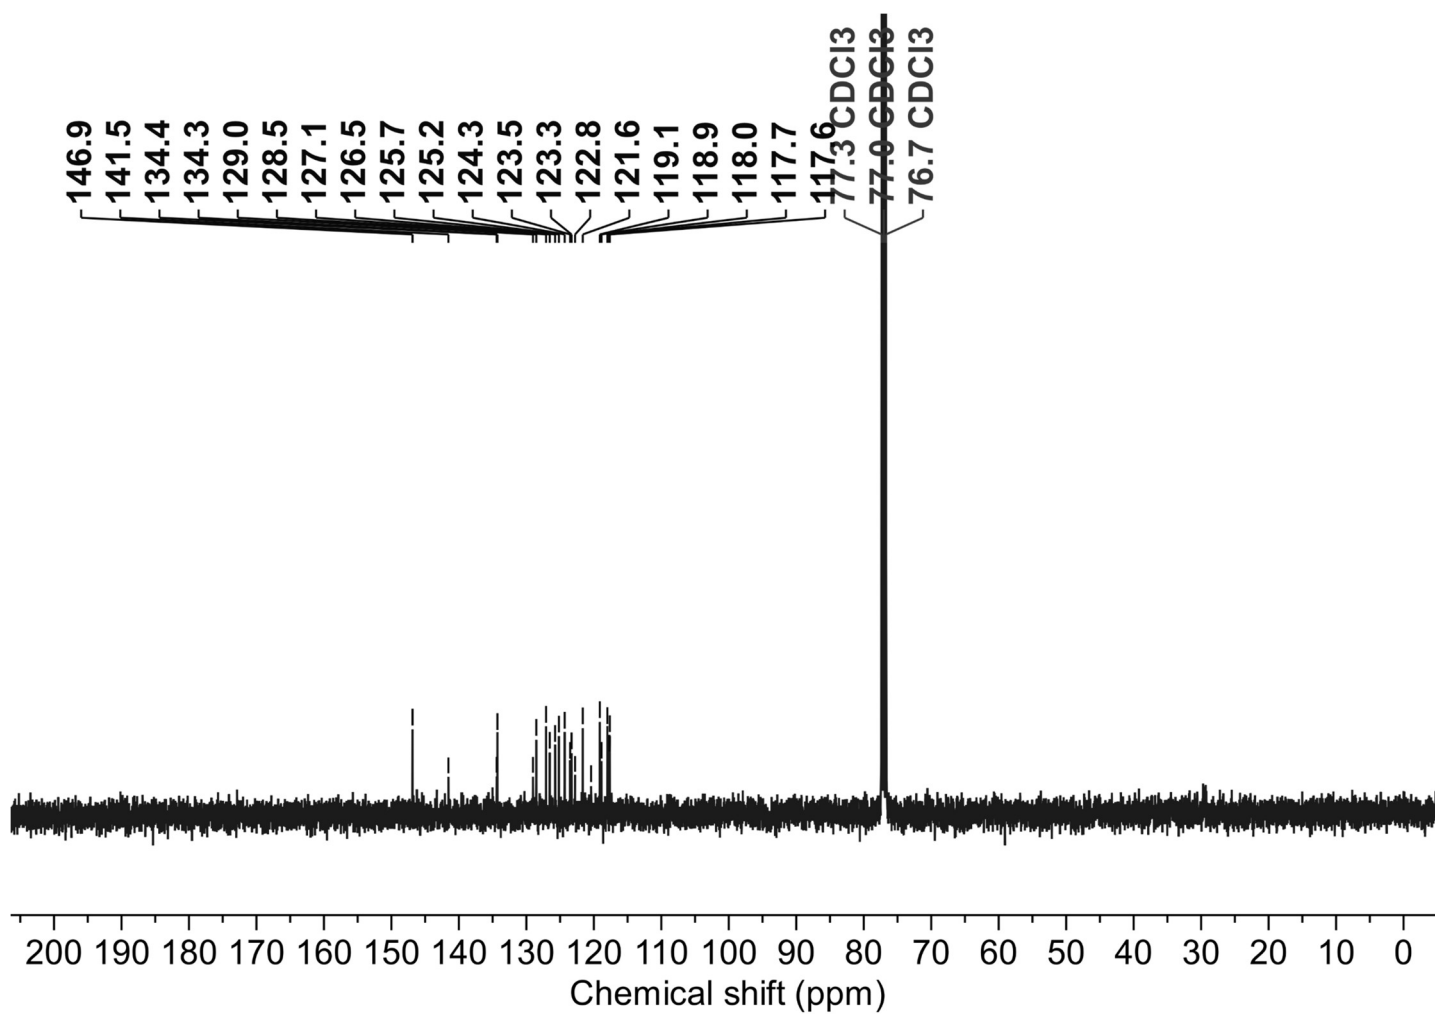

Phenanthro[2'',1''':2'',3''']imidazo[4'',5''':3',4']benzo[1',2':4,5]imidazo[1,2-*a*]phenanthroline (22):  $^1\text{H}$  NMR (400 MHz,  $\text{CDCl}_3$ )

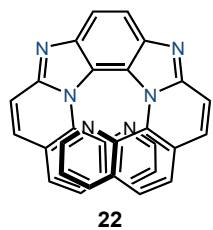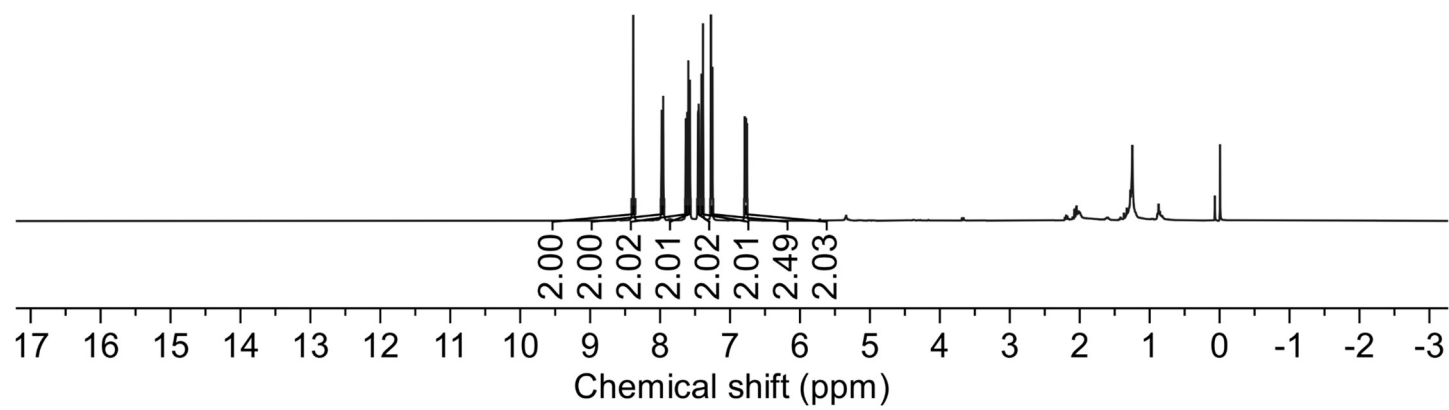

$^{13}\text{C}$  NMR (100 MHz,  $\text{CDCl}_3$ )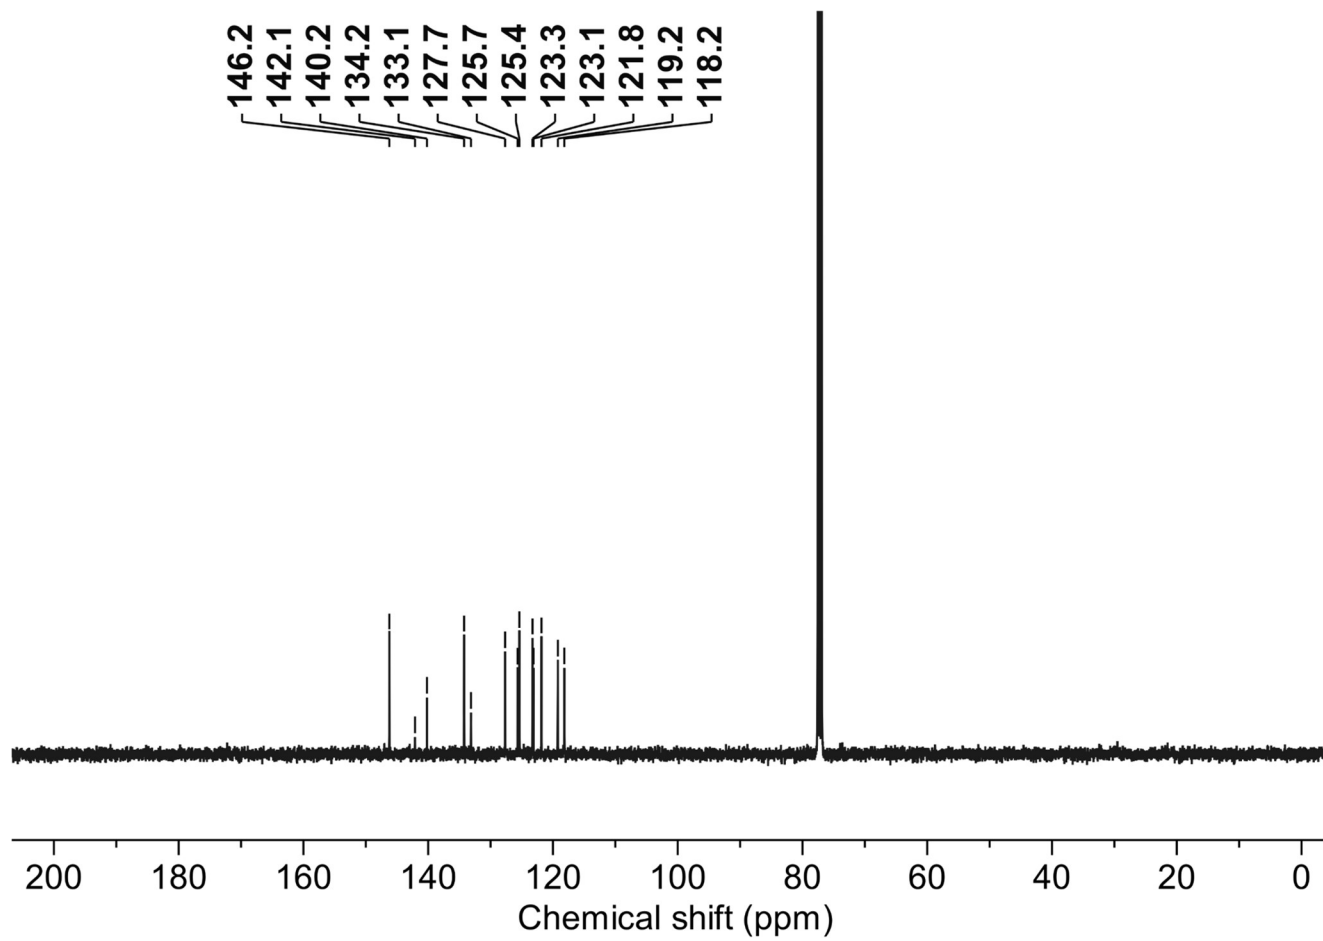

5,12-Di(N-((S)-1-phenylethyl)quinolino[2''',1''':2'',3'']imidazo[4'',5'':3',4']benzo[1',2':4,5]imidazo[1,2-a]quinoline (23):  $^1\text{H}$  NMR (400 MHz,  $\text{CDCl}_3$ )

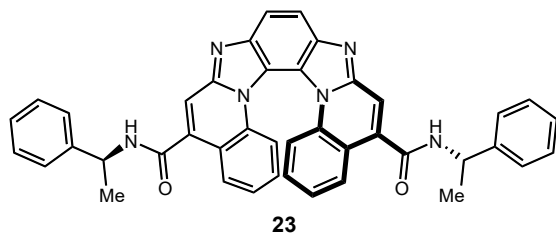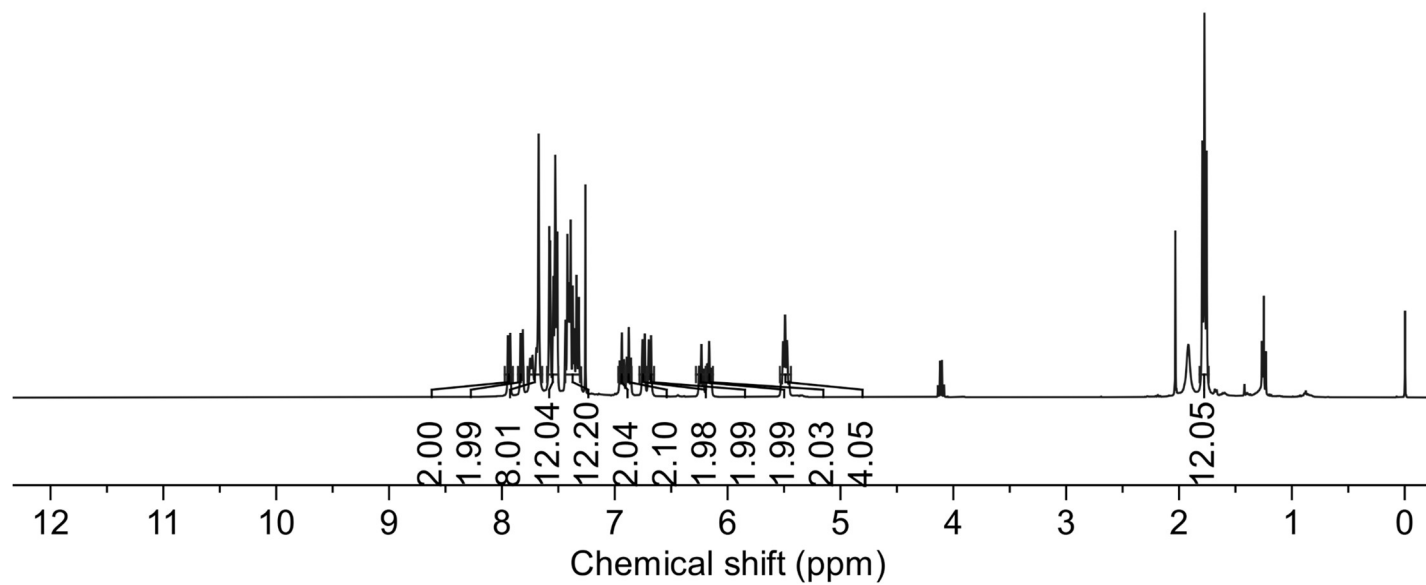

$^{13}\text{C}$  NMR (100 MHz,  $\text{CDCl}_3$ )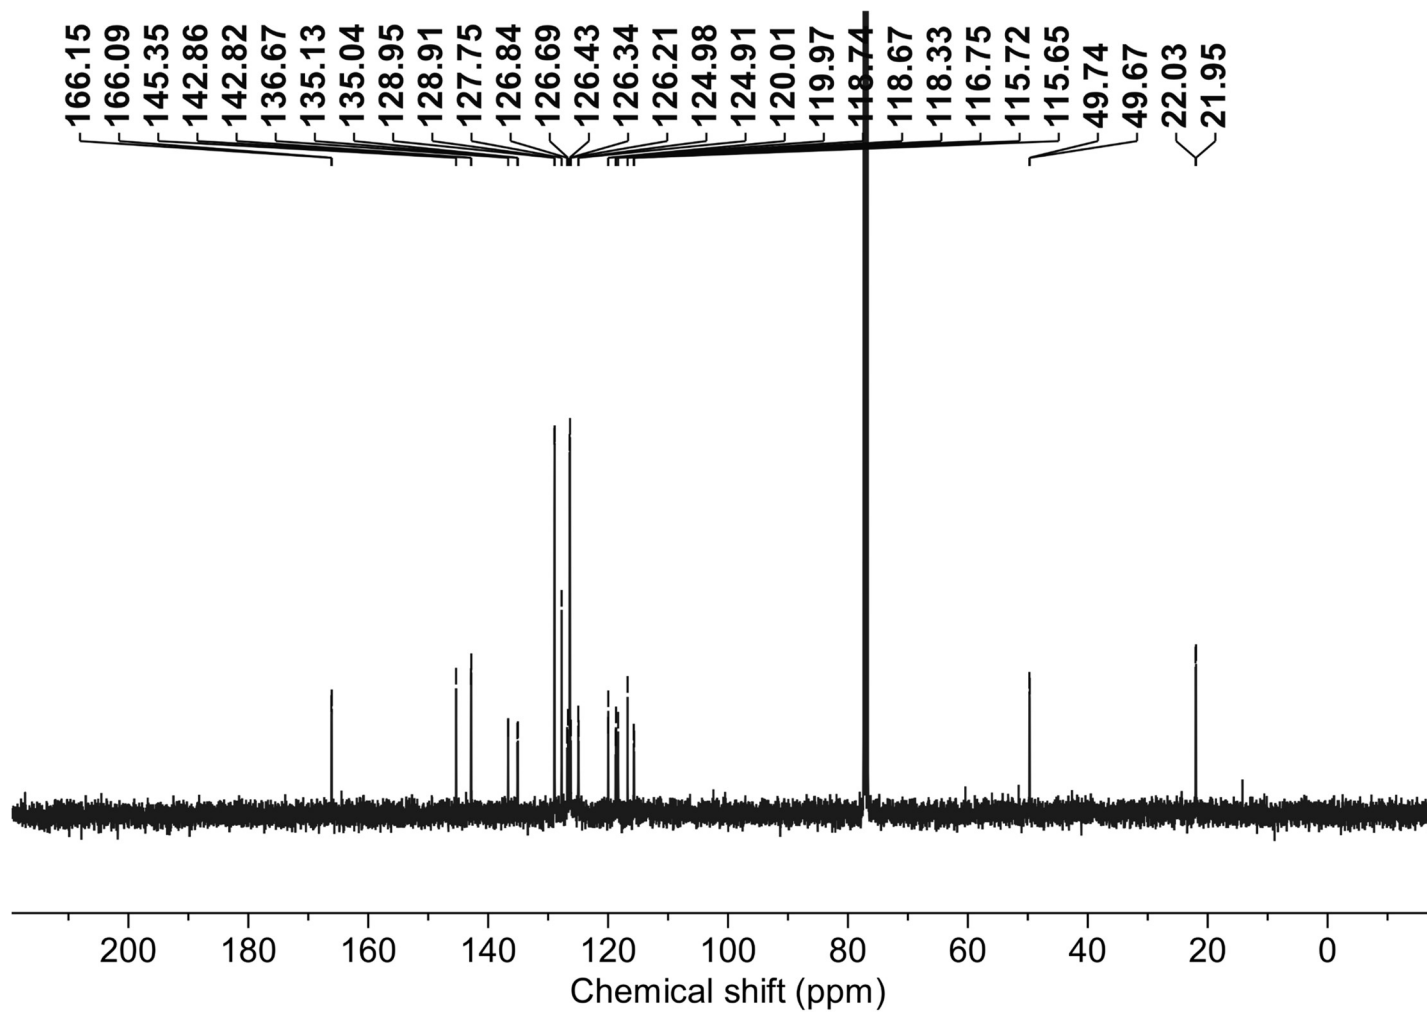

## 12 References

1. Otani, T. *et al.* Facile Two-Step Synthesis of 1,10-Phenanthroline-Derived Polyaza[7]helicenes with High Fluorescence and CPL Efficiency. *Angew. Chem. Int. Ed.* **56**, 3906–3910 (2017).
2. Otani, T. *et al.* Short-step synthesis and chiroptical properties of polyaza[5]–[9]helicenes with blue to green-colour emission. *Chem. Commun.* **56**, 4484–4487 (2020).
3. Rodríguez, R. *et al.* Mutual Monomer Orientation To Bias the Supramolecular Polymerization of [6]Helicenes and the Resulting Circularly Polarized Light and Spin Filtering Properties. *J. Am. Chem. Soc.* **144**, 7709–7719 (2022).
4. Zhang, D.-Y. *et al.* Highly Conductive Topologically Chiral Molecular Knots as Efficient Spin Filters. *J. Am. Chem. Soc.* **145**, 26791–26798 (2023).
5. Wang, Y., Zhang, Y., Wang, Y.-Y. & Yan, Q. Highly Conductive Chiral Organic Cages and Their Helical Assemblies Enable Efficient Spin Filtering. *J. Am. Chem. Soc.* **147**, 8751–8759 (2025).
6. Malatong, R. *et al.* Highly Durable Spin Filter Switching Based on Self-Assembled Chiral Molecular Motor. *Small* **19**, 2302714 (2023).
7. Suda, M. *et al.* Light-driven molecular switch for reconfigurable spin filters. *Nat. Commun.* **10**, 2455 (2019).
8. Zhu, Q. *et al.* Multistate Switching of Spin Selectivity in Electron Transport through Light-Driven Molecular Motors. *Adv. Sci.* **8**, 2101773 (2021).
9. Ko, C.-H. *et al.* Twisted molecular wires polarize spin currents at room temperature. *Proc. Natl. Acad. Sci.* **119**, e2116180119 (2022).
10. Bullard, G. *et al.* Low-Resistance Molecular Wires Propagate Spin-Polarized Currents. *J. Am. Chem. Soc.* **141**, 14707–14711 (2019).
11. Kettner, M. *et al.* Chirality-Dependent Electron Spin Filtering by Molecular Monolayers of Helicenes. *J. Phys. Chem. Lett.* **9**, 2025–2030 (2018).
12. Giaconi, N. *et al.* Efficient Spin-Selective Electron Transport at Low Voltages of Thia-Bridged Triarylamine Hetero[4]helicenes Chemisorbed Monolayer. *ACS Nano* **17**, 15189–15198 (2023).
13. Niu, W. *et al.* Lateral  $\pi$ -extended helical nanographenes with large spin polarization. *Chem. Sci.* **16**, 21446–21453 (2025).
14. Giaconi, N. *et al.* Spin polarized current in chiral organic radical monolayers. *J. Mater. Chem. C* **12**, 10029–10035 (2024).
15. Safari, M. R., Matthes, F., Schneider, C. M., Ernst, K. & Bürgler, D. E. Spin-Selective Electron Transport Through Single Chiral Molecules. *Small* **20**, 2308233 (2024).
16. Kiran, V. *et al.* Helicenes—A New Class of Organic Spin Filter. *Adv. Mater.* **28**, 1957–1962 (2016).
17. Rodríguez, R. *et al.* Weakly Self-Assembled [6]Helicenes: Circularly Polarized Light and Spin Filtering Properties. *Chem. – Eur. J.* **29**, e202302254 (2023).
18. Mishra, S. *et al.* Spin Filtering Along Chiral Polymers. *Angew. Chem. Int. Ed.* **59**, 14671–14676 (2020).
19. Bhowmick, D. K. *et al.* Spin-induced asymmetry reaction—The formation of asymmetric carbon by electropolymerization. *Sci. Adv.* **8**, eabq2727 (2022).
20. Wang, C. *et al.* Transverse Spin Selectivity in Helical Nanofibers Prepared without Any Chiral Molecule. *Phys. Rev. Lett.* **133**, 108001 (2024).
21. Mondal, A. K. *et al.* Spin Filtering in Supramolecular Polymers Assembled from Achiral Monomers Mediated by Chiral Solvents. *J. Am. Chem. Soc.* **143**, 7189–7195 (2021).

22. Sang, Y. *et al.* Ultrasound-Directed Symmetry Breaking and Spin Filtering of Supramolecular Assemblies from only Achiral Building Blocks. *Angew. Chem. Int. Ed.* **62**, e202215867 (2023).
23. Kulkarni, C. *et al.* Highly Efficient and Tunable Filtering of Electrons' Spin by Supramolecular Chirality of Nanofiber-Based Materials. *Adv Mater.* **32**, 1904965(2020).
24. Sun, S., Jiang, J., Jia, M., Tian, Y. & Xiao, Y. 1.5D Chiral Perovskites Mediated by Hydrogen-Bonding Network with Remarkable Spin-Polarized Property. *Angew. Chem. Int. Ed.* **64**, e202423314 (2025).
25. Kim, Y.-H. *et al.* Chiral-induced spin selectivity enables a room-temperature spin light-emitting diode. *Science* **371**, 1129–1133 (2021).
26. Park, Y. S. *et al.* Efficient solar-driven hydrogen peroxide production enabled by a perovskite electrochemical device integrated with a cobalt-based chiral catalyst. *Energy Environ. Sci.* **19**, 312–326 (2026).
27. Feng, S. *et al.* Chiral two-dimensional conjugated metal-organic frameworks with high spin polarization. *Nat. Commun.* **16**, 9473 (2025).
28. Chen, X. *et al.* Helical polymer metal–organic framework hybrids. *Nat. Synth.* **5**, 46–54 (2025).
29. Jiang, L. *et al.* Morphological chirality engineering in achiral CoNi-MOFs enables CISS-driven spin-selective oxygen evolution. *Nano Res.* **18**, 94907634 (2025).
30. Jiang, C. *et al.* Topology-Controlled Chirality and Spin Selectivity in Two-Dimensional Covalent Organic Frameworks. *J. Am. Chem. Soc.* **148**, 2551–2562 (2026).
31. Zhang, X. *et al.* Amplifying Chirality-Induced Spin Selectivity in Helical Covalent Organic Frameworks through Fullerene Encapsulation. *J. Am. Chem. Soc.* **147**, 26546–26556 (2025).
32. Liu, Z. *et al.* An Insight into the Relation of Spin-Polarization and Oxygen Evolution Enhancement with a Monolayer Chiral Covalent Organic Framework Model Catalyst. *J. Am. Chem. Soc.* **147**, 31975–31983 (2025).
33. Sun, X., Zhang, K.-Y., Zhou, S.-Z. & Fu, H.-H. Robust chirality-induced spin selectivity in topologically chiral molecular knots. *Nat. Commun.* <https://doi.org/10.1038/s41467-025-67988-8> (2025)
34. Bloom, B. P., Kiran, V., Varade, V., Naaman, R. & Waldeck, David. H. Spin Selective Charge Transport through Cysteine Capped CdSe Quantum Dots. *Nano Lett.* **16**, 4583–4589 (2016).
35. Mishra, S. *et al.* Length-Dependent Electron Spin Polarization in Oligopeptides and DNA. *J. Phys. Chem. C* **124**, 10776–10782 (2020).
36. Labella, J., Bhowmick, D. K., Kumar, A., Naaman, R. & Torres, T. Easily processable spin filters: exploring the chiral induced spin selectivity of bowl-shaped chiral subphthalocyanines. *Chem. Sci.* **14**, 4273–4277 (2023).
37. Bian, Z. *et al.* Hybrid Chiral MoS<sub>2</sub> Layers for Spin-Polarized Charge Transport and Spin-Dependent Electrocatalytic Applications. *Adv. Sci.* **9**, 2201063 (2022).
